# Supplementary material for: Anti-Adipogenic Lanostane-Type Triterpenoids from the Edible and Medicinal Mushroom Ganoderma applanatum
Source: MDPI journal article supplement (doi:10.3390/jof8040331), 2022-03-22
Supplement: s1 [file s1]

**Anti-Adipogenic Lanostane-Type Triterpenoids from the Edible and Medicinal Mushroom *Ganoderma applanatum***

**Xing-Rong Peng,<sup>1,2,#</sup> Qian Wang,<sup>3,#</sup> Hai-Guo Su,<sup>1,2</sup> Lin Zhou,<sup>1,2</sup> Wen-Yong Xiong,<sup>1,3,\*</sup> and Ming-Hua Qiu<sup>1,2,\*</sup>**

1 State Key Laboratory of Phytochemistry and Plant Resources in West China, Kunming Institute of Botany, Chinese Academy of Science, Kunming 650201, People's Republic of China

2 University of the Chinese Academy of Science, Beijing 100049, People's Republic of China

3 Key Laboratory of Medicinal Chemistry for Natural Resource, Ministry of Education; Yunnan Provincial Center for Research & Development of Natural Products; School of Chemical Science and Technology, Yunnan University, Kunming 650091, P.R.China.

\* Correspondence: pengxingrong@mail.kib.ac.cn (X.-R.P); xwy@ynu.edu.cn (W.-Y.X); mhchiu@mail.kib.ac.cn (M.-H.Q)

<sup>#</sup> These authors equally contribute to this paper.

## Contents

|                                                                                                                          |           |
|--------------------------------------------------------------------------------------------------------------------------|-----------|
| <b>Section S1: 1D and 2D NMR spectra of compound 1 .....</b>                                                             | <b>7</b>  |
| Figure S1. <sup>1</sup> H NMR (600 MHz, MeOH- <i>d</i> <sub>4</sub> ) spectrum of 1. ....                                | 7         |
| Figure S2. <sup>13</sup> C NMR (150 MHz, MeOH- <i>d</i> <sub>4</sub> ) spectrum of 1. ....                               | 8         |
| Figure S3. <sup>1</sup> H- <sup>1</sup> H COSY (600 MHz, MeOH- <i>d</i> <sub>4</sub> ) spectrum of 1. ....               | 9         |
| Figure S4. HSQC (600/150 MHz, MeOH- <i>d</i> <sub>4</sub> ) spectrum of 1. ....                                          | 10        |
| Figure S5. HMBC (600/150 MHz, MeOH- <i>d</i> <sub>4</sub> ) spectrum of 1. ....                                          | 11        |
| Figure S6. ROESY (600/150 MHz, MeOH- <i>d</i> <sub>4</sub> ) spectrum of 1. ....                                         | 12        |
| <b>Section S2: HRESIMS spectrum of 1 .....</b>                                                                           | <b>13</b> |
| <b>Section S3: X-ray crystallographic data of 1 .....</b>                                                                | <b>14</b> |
| <b>Section S4: 1D and 2D NMR spectra of compound 2 .....</b>                                                             | <b>16</b> |
| Figure S8. <sup>1</sup> H NMR (600 MHz, MeOH- <i>d</i> <sub>4</sub> ) spectrum of 2. ....                                | 16        |
| Figure S9. <sup>13</sup> C NMR (150 MHz, MeOH- <i>d</i> <sub>4</sub> ) spectrum of 2. ....                               | 17        |
| Figure S10. <sup>1</sup> H- <sup>1</sup> H COSY (600 MHz, MeOH- <i>d</i> <sub>4</sub> ) spectrum of 2. ....              | 18        |
| Figure S11. HSQC (600/150 MHz, MeOH- <i>d</i> <sub>4</sub> ) spectrum of 2. ....                                         | 19        |
| Figure S12. HMBC (600/150 MHz, MeOH- <i>d</i> <sub>4</sub> ) spectrum of 2. ....                                         | 20        |
| Figure S13. ROESY (600/150 MHz, MeOH- <i>d</i> <sub>4</sub> ) spectrum of 2. ....                                        | 21        |
| <b>Section S5: HRESIMS spectrum of 2 .....</b>                                                                           | <b>22</b> |
| <b>Section S6: 1D and 2D NMR spectra of compound 3 .....</b>                                                             | <b>23</b> |
| Figure S15. <sup>1</sup> H NMR (600 MHz, MeOH- <i>d</i> <sub>4</sub> ) spectrum of 3. ....                               | 23        |
| Figure S16. <sup>13</sup> C NMR (150 MHz, MeOH- <i>d</i> <sub>4</sub> ) spectrum of 3. ....                              | 24        |
| Figure S17. <sup>1</sup> H- <sup>1</sup> H COSY (600 MHz, MeOH- <i>d</i> <sub>4</sub> ) spectrum of 3. ....              | 25        |
| Figure S18. HSQC (600/150 MHz, MeOH- <i>d</i> <sub>4</sub> ) spectrum of 3. ....                                         | 26        |
| Figure S19. HMBC (600/150 MHz, MeOH- <i>d</i> <sub>4</sub> ) spectrum of 3. ....                                         | 27        |
| Figure S20. ROESY (600/150 MHz, MeOH- <i>d</i> <sub>4</sub> ) spectrum of 3. ....                                        | 28        |
| <b>Section S7: HRESIMS spectrum of 3 .....</b>                                                                           | <b>29</b> |
| <b>Section S8: 1D and 2D NMR spectra of compound 4 .....</b>                                                             | <b>30</b> |
| Figure S22. <sup>1</sup> H NMR (600 MHz, MeOH- <i>d</i> <sub>4</sub> ) spectrum of 4. ....                               | 30        |
| Figure S23. <sup>13</sup> C NMR (150 MHz, MeOH- <i>d</i> <sub>4</sub> ) spectrum of 4. ....                              | 31        |
| Figure S24. <sup>1</sup> H- <sup>1</sup> H COSY (600 MHz, MeOH- <i>d</i> <sub>4</sub> ) spectrum of 4. ....              | 32        |
| Figure S25. HSQC (600/150 MHz, MeOH- <i>d</i> <sub>4</sub> ) spectrum of 4. ....                                         | 33        |
| Figure S26. HMBC (600/150 MHz, MeOH- <i>d</i> <sub>4</sub> ) spectrum of 4. ....                                         | 34        |
| Figure S27. ROESY (600/150 MHz, MeOH- <i>d</i> <sub>4</sub> ) spectrum of 4. ....                                        | 35        |
| <b>Section S9: HRESIMS spectrum of 4 .....</b>                                                                           | <b>36</b> |
| <b>Section S10: Comparison of <sup>1</sup>H NMR and <sup>1</sup>H-<sup>1</sup>H COSY spectra between 4r and 4s .....</b> | <b>37</b> |



|                                                                                                      |    |
|------------------------------------------------------------------------------------------------------|----|
| Figure S29. Comparison of $^1\text{H}$ NMR spectra (600 MHz, pyridine- $d_5$ ) between 4r and 4s.... | 37 |
| Figure S30. The $^1\text{H}$ - $^1\text{H}$ COSY spectrum (600 MHz, pyridine- $d_5$ ) of 4r. ....    | 38 |
| Figure S31. The $^1\text{H}$ - $^1\text{H}$ COSY spectrum (600 MHz, pyridine- $d_5$ ) of 4r. ....    | 39 |
| Section S11: 1D and 2D NMR spectra of compound 5 .....                                               | 40 |
| Figure S32. $^1\text{H}$ NMR (600 MHz, MeOH- $d_4$ ) spectrum of 5. ....                             | 40 |
| Figure S33. $^{13}\text{C}$ NMR (150 MHz, MeOH- $d_4$ ) spectrum of 5. ....                          | 41 |
| Figure S34. $^1\text{H}$ - $^1\text{H}$ COSY (600 MHz, MeOH- $d_4$ ) spectrum of 5. ....             | 42 |
| Figure S35. HSQC (600/150 MHz, MeOH- $d_4$ ) spectrum of 5. ....                                     | 43 |
| Figure S36. HMBC (600/150 MHz, MeOH- $d_4$ ) spectrum of 5. ....                                     | 44 |
| Figure S37. ROESY (600/150 MHz, MeOH- $d_4$ ) spectrum of 5. ....                                    | 45 |
| Section S12: HRESIMS spectrum of 5.....                                                              | 46 |
| Section S13: 1D and 2D NMR spectra of compound 6 .....                                               | 47 |
| Figure S39. $^1\text{H}$ NMR (600 MHz, MeOH- $d_4$ ) spectrum of 6. ....                             | 47 |
| Figure S40. $^{13}\text{C}$ NMR (150 MHz, MeOH- $d_4$ ) spectrum of 6. ....                          | 48 |
| Figure S41. $^1\text{H}$ - $^1\text{H}$ COSY (600 MHz, MeOH- $d_4$ ) spectrum of 6. ....             | 49 |
| Figure S42. HSQC (600/150 MHz, MeOH- $d_4$ ) spectrum of 6. ....                                     | 50 |
| Figure S43. HMBC (600/150 MHz, MeOH- $d_4$ ) spectrum of 6. ....                                     | 51 |
| Figure S44. ROESY (600/150 MHz, MeOH- $d_4$ ) spectrum of 6. ....                                    | 52 |
| Section S14: HRESIMS spectrum of 6.....                                                              | 53 |
| Section S15: 1D and 2D NMR spectra of compound 7 .....                                               | 54 |
| Figure S46. $^1\text{H}$ NMR (600 MHz, MeOH- $d_4$ ) spectrum of 7. ....                             | 54 |
| Figure S47. $^{13}\text{C}$ NMR (150 MHz, MeOH- $d_4$ ) spectrum of 7. ....                          | 55 |
| Figure S48. $^1\text{H}$ - $^1\text{H}$ COSY (600 MHz, MeOH- $d_4$ ) spectrum of 7. ....             | 56 |
| Figure S49. HSQC (600/150 MHz, MeOH- $d_4$ ) spectrum of 7. ....                                     | 57 |
| Figure S50. HMBC (600/150 MHz, MeOH- $d_4$ ) spectrum of 7. ....                                     | 58 |
| Figure S51. ROESY (600/150 MHz, MeOH- $d_4$ ) spectrum of 7. ....                                    | 59 |
| Section S16: HRESIMS spectrum of 7.....                                                              | 60 |
| Section S17: 1D and 2D NMR spectra of compound 8 .....                                               | 61 |
| Figure S53. $^1\text{H}$ NMR (600 MHz, MeOH- $d_4$ ) spectrum of 8. ....                             | 61 |
| Figure S54. $^{13}\text{C}$ NMR (150 MHz, MeOH- $d_4$ ) spectrum of 8. ....                          | 62 |
| Figure S55. $^1\text{H}$ - $^1\text{H}$ COSY (600 MHz, MeOH- $d_4$ ) spectrum of 8. ....             | 63 |
| Figure S56. HSQC (600/150 MHz, MeOH- $d_4$ ) spectrum of 8. ....                                     | 64 |
| Figure S57. HMBC (600/150 MHz, MeOH- $d_4$ ) spectrum of 8. ....                                     | 65 |
| Figure S58. ROESY (600 MHz, MeOH- $d_4$ ) spectrum of 8. ....                                        | 66 |
| Section S18: HRESIMS spectrum of 8.....                                                              | 67 |
| Section S19: 1D and 2D NMR spectra of compound 9 .....                                               | 68 |

|                                                                                                             |    |
|-------------------------------------------------------------------------------------------------------------|----|
| Figure S60. <sup>1</sup> H NMR (600 MHz, CDCl <sub>3</sub> ) spectrum of 9.....                             | 68 |
| Figure S61. <sup>13</sup> C NMR (150 MHz, CDCl <sub>3</sub> ) spectrum of 9.....                            | 69 |
| Figure S62. <sup>1</sup> H- <sup>1</sup> H COSY (600 MHz, CDCl <sub>3</sub> ) spectrum of 9. ....           | 70 |
| Figure S63. HSQC (600/150 MHz, CDCl <sub>3</sub> ) spectrum of 9. ....                                      | 71 |
| Figure S64. HMBC (600/150 MHz, CDCl <sub>3</sub> ) spectrum of 9. ....                                      | 72 |
| Figure S65. ROESY (600/150 MHz, CDCl <sub>3</sub> ) spectrum of 9.....                                      | 73 |
| Section S20: HRESIMS spectrum of 9.....                                                                     | 74 |
| Section S21: 1D and 2D NMR spectra of compound 10 .....                                                     | 75 |
| Figure S67. <sup>1</sup> H NMR (600 MHz, MeOH- <i>d</i> <sub>4</sub> ) spectrum of 10. ....                 | 75 |
| Figure S68. <sup>13</sup> C NMR (150 MHz, MeOH- <i>d</i> <sub>4</sub> ) spectrum of 10. ....                | 76 |
| Figure S69. <sup>1</sup> H- <sup>1</sup> H COSY (600 MHz, MeOH- <i>d</i> <sub>4</sub> ) spectrum of 10..... | 77 |
| Figure S70. HSQC (600/150 MHz, MeOH- <i>d</i> <sub>4</sub> ) spectrum of 10.....                            | 78 |
| Figure S71. HMBC (600/150 MHz, MeOH- <i>d</i> <sub>4</sub> ) spectrum of 10.....                            | 79 |
| Figure S72. ROESY (600/150 MHz, MeOH- <i>d</i> <sub>4</sub> ) spectrum of 10. ....                          | 80 |
| Section S22: HRESIMS spectrum of 10 .....                                                                   | 81 |
| Section S23: 1D and 2D NMR spectra of compound 11 .....                                                     | 82 |
| Figure S74. <sup>1</sup> H NMR (600 MHz, MeOH- <i>d</i> <sub>4</sub> ) spectrum of 11. ....                 | 82 |
| Figure S75. <sup>13</sup> C NMR (150 MHz, MeOH- <i>d</i> <sub>4</sub> ) spectrum of 11. ....                | 83 |
| Figure S76. <sup>1</sup> H- <sup>1</sup> H COSY (600 MHz, MeOH- <i>d</i> <sub>4</sub> ) spectrum of 11..... | 84 |
| Figure S77. HSQC (600/150 MHz, MeOH- <i>d</i> <sub>4</sub> ) spectrum of 11.....                            | 85 |
| Figure S78. HMBC (600/150 MHz, MeOH- <i>d</i> <sub>4</sub> ) spectrum of 11.....                            | 86 |
| Figure S79. ROESY (600/150 MHz, MeOH- <i>d</i> <sub>4</sub> ) spectrum of 11. ....                          | 87 |
| Section S24: HRESIMS spectrum of 11 .....                                                                   | 88 |
| Section S25: 1D and 2D NMR spectra of compound 12 .....                                                     | 89 |
| Figure S81. <sup>1</sup> H NMR (600 MHz, MeOH- <i>d</i> <sub>4</sub> ) spectrum of 12. ....                 | 89 |
| Figure S82. <sup>13</sup> C NMR (150 MHz, MeOH- <i>d</i> <sub>4</sub> ) spectrum of 12. ....                | 90 |
| Figure S83. <sup>1</sup> H- <sup>1</sup> H COSY (600 MHz, MeOH- <i>d</i> <sub>4</sub> ) spectrum of 12..... | 91 |
| Figure S84. HSQC (600/150 MHz, MeOH- <i>d</i> <sub>4</sub> ) spectrum of 12.....                            | 92 |
| Figure S85. HMBC (600/150 MHz, MeOH- <i>d</i> <sub>4</sub> ) spectrum of 12.....                            | 93 |
| Figure S86. ROESY (600/150 MHz, MeOH- <i>d</i> <sub>4</sub> ) spectrum of 12. ....                          | 94 |
| Section S26: HRESIMS spectrum of 12 .....                                                                   | 95 |
| Section S27: 1D and 2D NMR spectra of compound 13 .....                                                     | 96 |
| Figure S88. <sup>1</sup> H NMR (600 MHz, MeOH- <i>d</i> <sub>4</sub> ) spectrum of 13. ....                 | 96 |
| Figure S89. <sup>13</sup> C NMR (150 MHz, MeOH- <i>d</i> <sub>4</sub> ) spectrum of 13. ....                | 97 |
| Figure S90. <sup>1</sup> H- <sup>1</sup> H COSY (600 MHz, MeOH- <i>d</i> <sub>4</sub> ) spectrum of 13..... | 98 |
| Figure S91. HSQC (600/150 MHz, MeOH- <i>d</i> <sub>4</sub> ) spectrum of 13.....                            | 99 |

|                                                                                                                     |     |
|---------------------------------------------------------------------------------------------------------------------|-----|
| Figure S92. HMBC (600/150 MHz, MeOH- <i>d</i> <sub>4</sub> ) spectrum of 13.....                                    | 100 |
| Figure S93. ROESY (600/150 MHz, MeOH- <i>d</i> <sub>4</sub> ) spectrum of 13. ....                                  | 101 |
| Section S28: HRESIMS spectrum of 13 .....                                                                           | 102 |
| Section S29: 1D and 2D NMR spectra of compound 14 .....                                                             | 103 |
| Figure S95. <sup>1</sup> H NMR (600 MHz, MeOH- <i>d</i> <sub>4</sub> ) spectrum of 14. ....                         | 103 |
| Figure S96. <sup>13</sup> C NMR (150 MHz, MeOH- <i>d</i> <sub>4</sub> ) spectrum of 14. ....                        | 104 |
| Figure S97. <sup>1</sup> H- <sup>1</sup> H COSY (600 MHz, MeOH- <i>d</i> <sub>4</sub> ) spectrum of 14.....         | 105 |
| Figure S98. HSQC (600/150 MHz, MeOH- <i>d</i> <sub>4</sub> ) spectrum of 14.....                                    | 106 |
| Figure S99. HMBC (600/150 MHz, MeOH- <i>d</i> <sub>4</sub> ) spectrum of 14.....                                    | 107 |
| Figure S100. ROESY (600/150 MHz, MeOH- <i>d</i> <sub>4</sub> ) spectrum of 14.....                                  | 108 |
| Section S30: HRESIMS spectrum of 14 .....                                                                           | 109 |
| Section S31: 1D and 2D NMR spectra of compound 15 .....                                                             | 110 |
| Figure S102. Comparison of the <sup>1</sup> H NMR (600 MHz, MeOH- <i>d</i> <sub>4</sub> ) spectra of 15 and 28..... | 110 |
| Section S32: HRESIMS spectrum of 15 .....                                                                           | 111 |
| Figure S103. HRESIMS spectrum of 15.....                                                                            | 111 |
| Section S33: 1D and 2D NMR spectra of compound 16 .....                                                             | 112 |
| Figure S104. <sup>1</sup> H NMR (600 MHz, CDCl <sub>3</sub> ) spectrum of 16.....                                   | 112 |
| Figure S105. <sup>13</sup> C NMR (150 MHz, CDCl <sub>3</sub> ) spectrum of 16.....                                  | 113 |
| Figure S106. <sup>1</sup> H- <sup>1</sup> H COSY (600 MHz, CDCl <sub>3</sub> ) spectrum of 16. ....                 | 114 |
| Figure S107. HSQC (600/150 MHz, CDCl <sub>3</sub> ) spectrum of 16. ....                                            | 115 |
| Figure S108. HMBC (600/150 MHz, CDCl <sub>3</sub> ) spectrum of 16. ....                                            | 116 |
| Figure S109. ROESY (600/150 MHz, CDCl <sub>3</sub> ) spectrum of 16.....                                            | 117 |
| Section S34: HRESIMS spectrum of 16 .....                                                                           | 118 |

## Section S1: 1D and 2D NMR spectra of compound 1

Figure S1.  $^1\text{H}$  NMR (600 MHz,  $\text{MeOH-}d_4$ ) spectrum of 1.

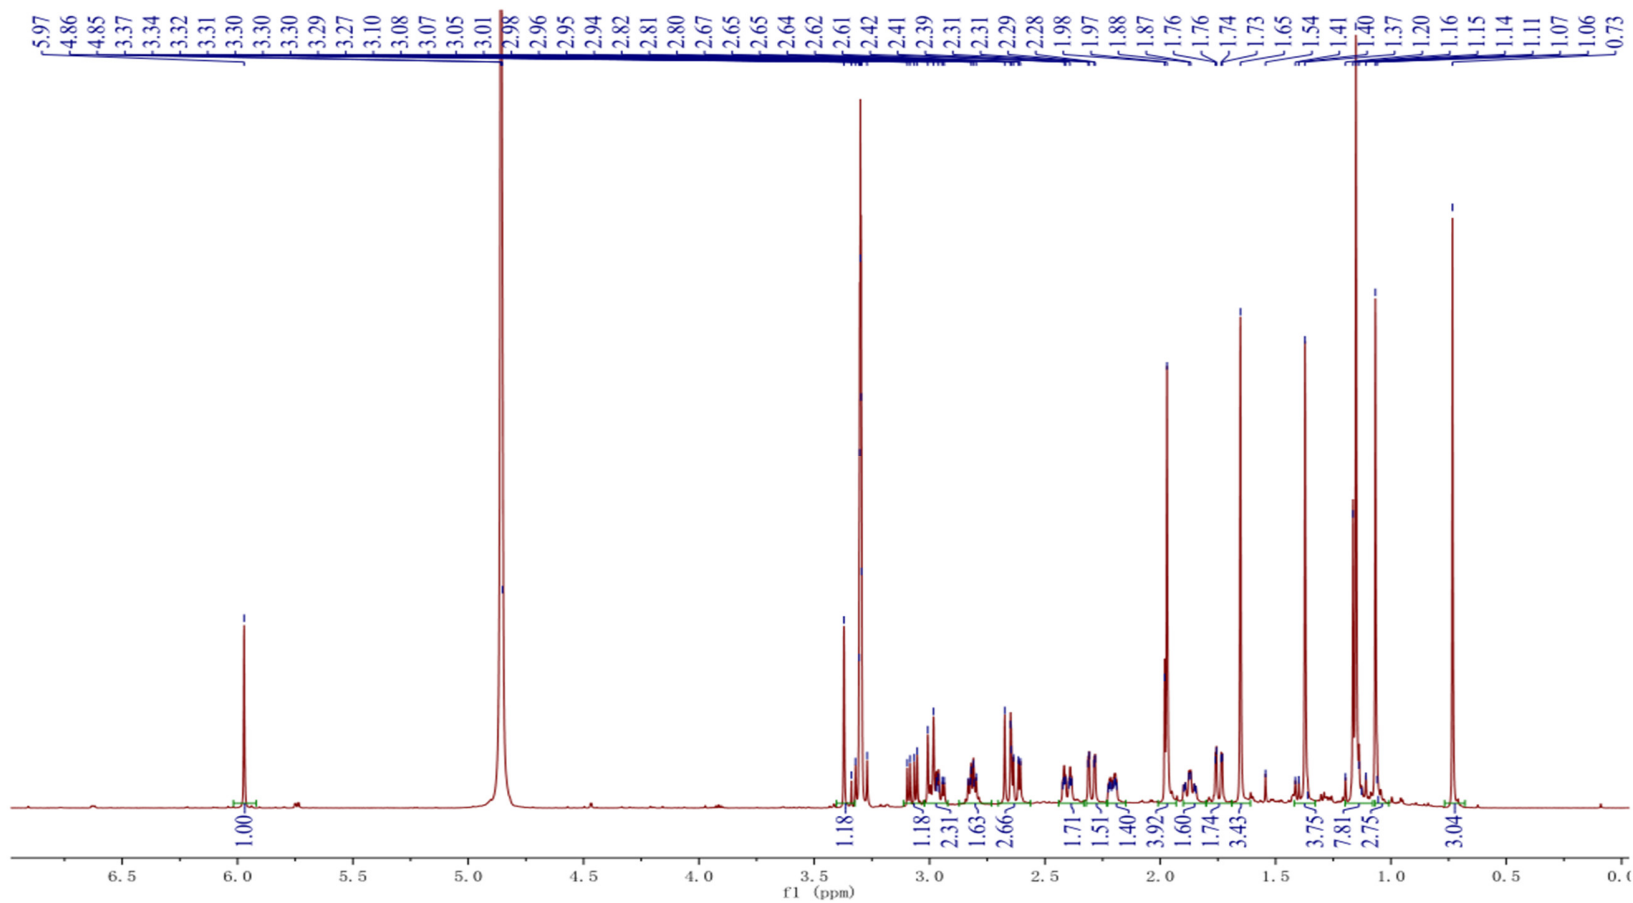

Figure S2.  $^{13}\text{C}$  NMR (150 MHz,  $\text{MeOH-}d_4$ ) spectrum of 1.

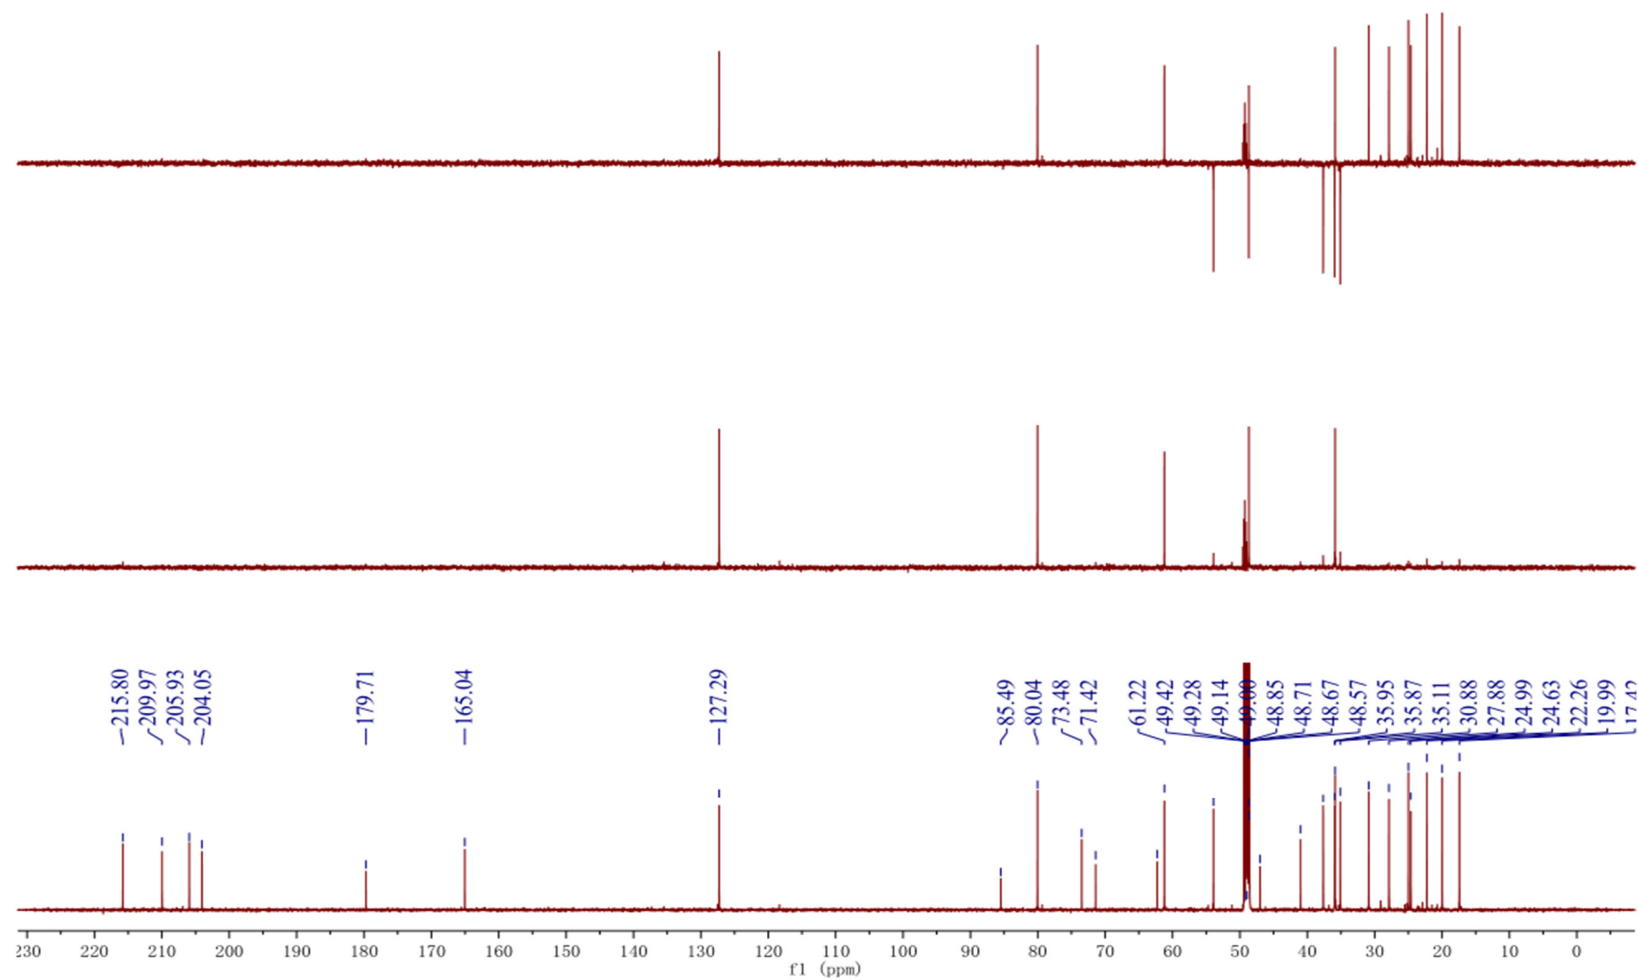

Figure S3.  $^1\text{H}$ - $^1\text{H}$  COSY (600 MHz,  $\text{MeOH-}d_4$ ) spectrum of 1.

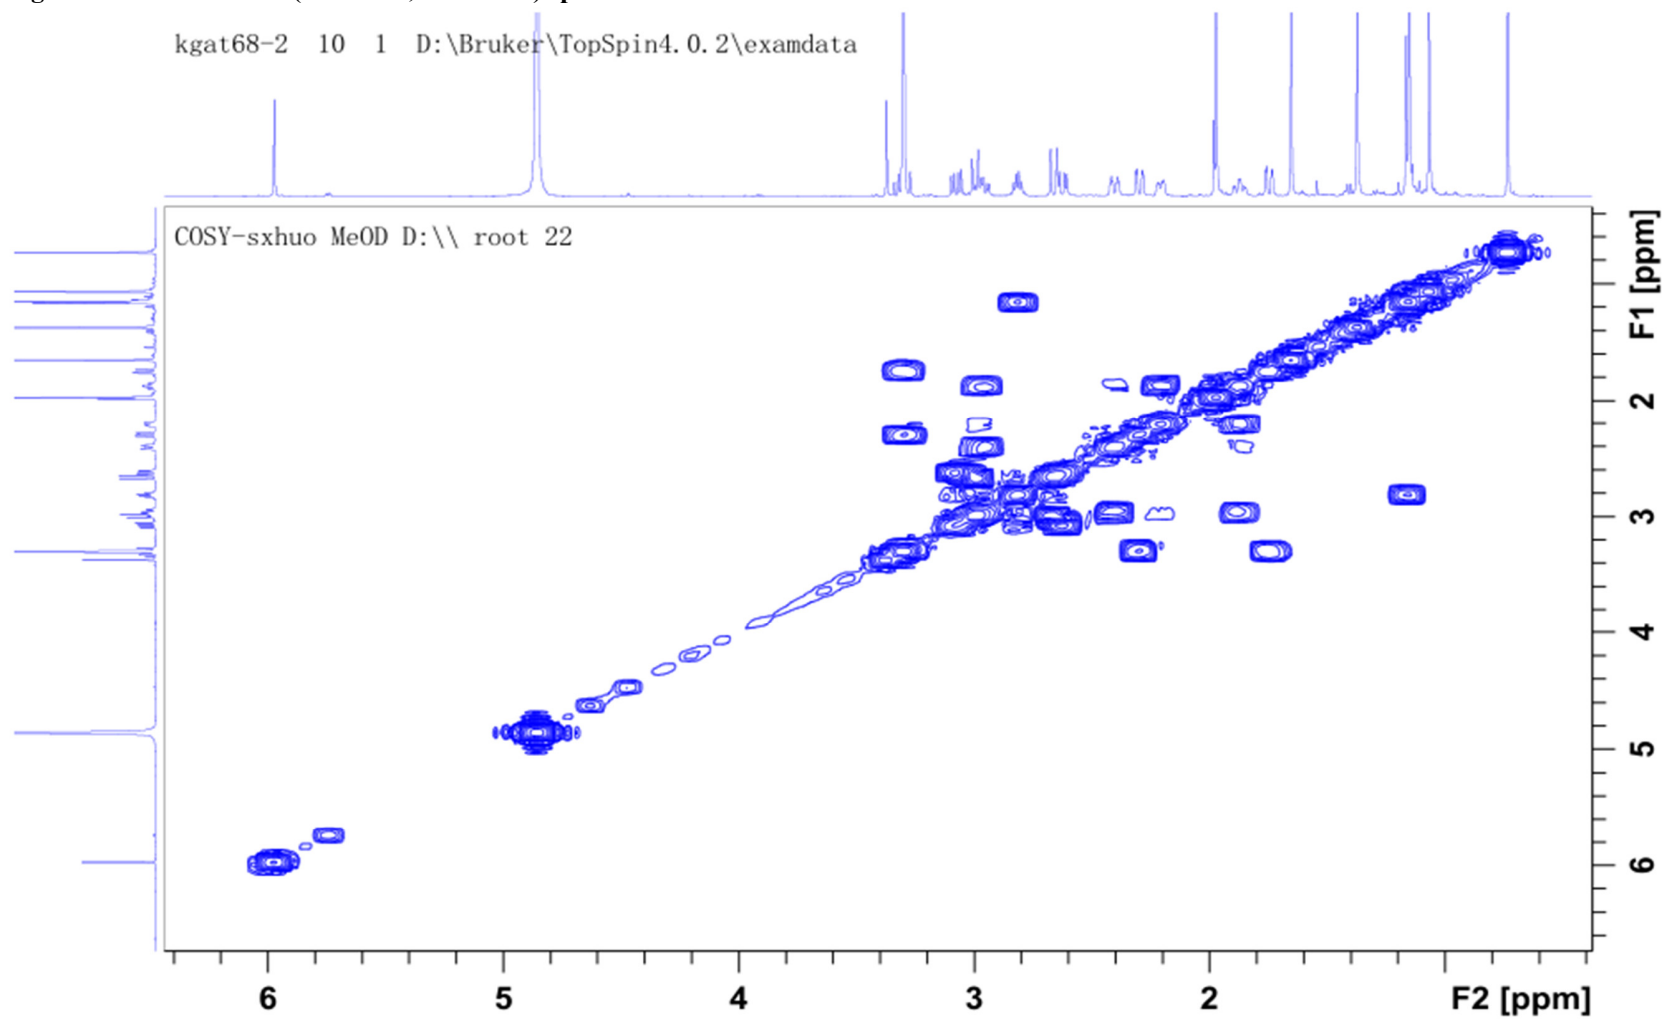

Figure S4. HSQC (600/150 MHz, MeOH-*d*<sub>4</sub>) spectrum of 1.

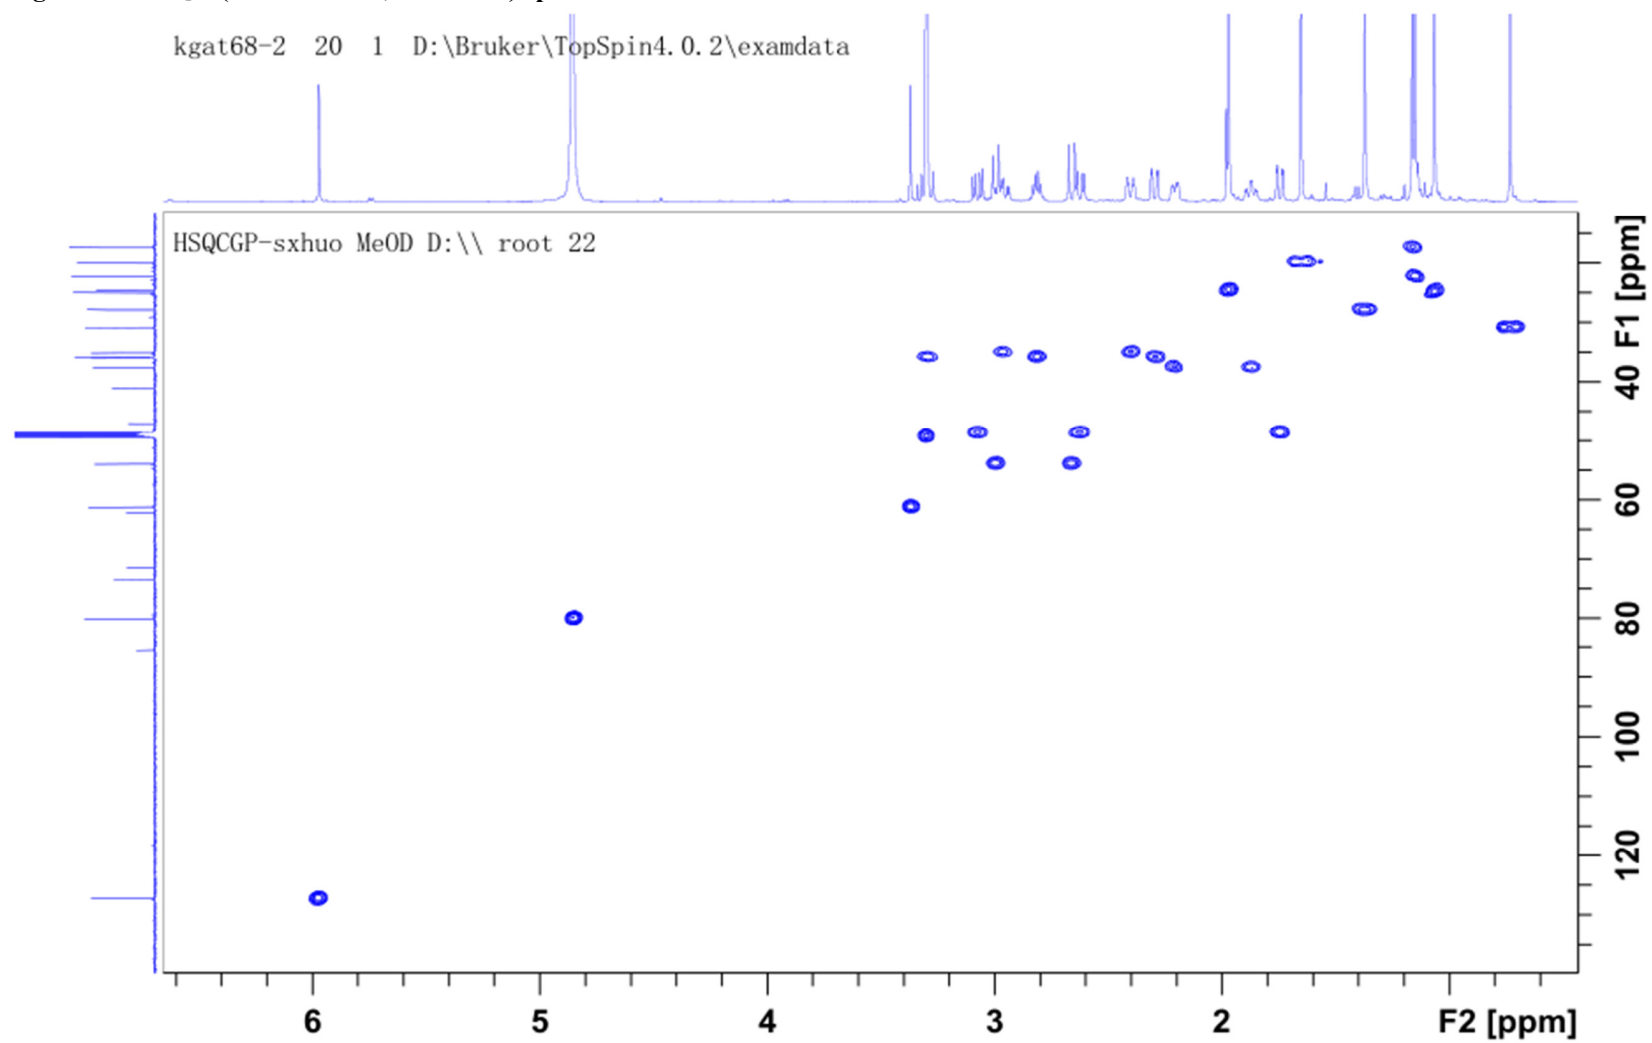

Figure S5. HMBC (600/150 MHz, MeOH-*d*<sub>4</sub>) spectrum of 1.

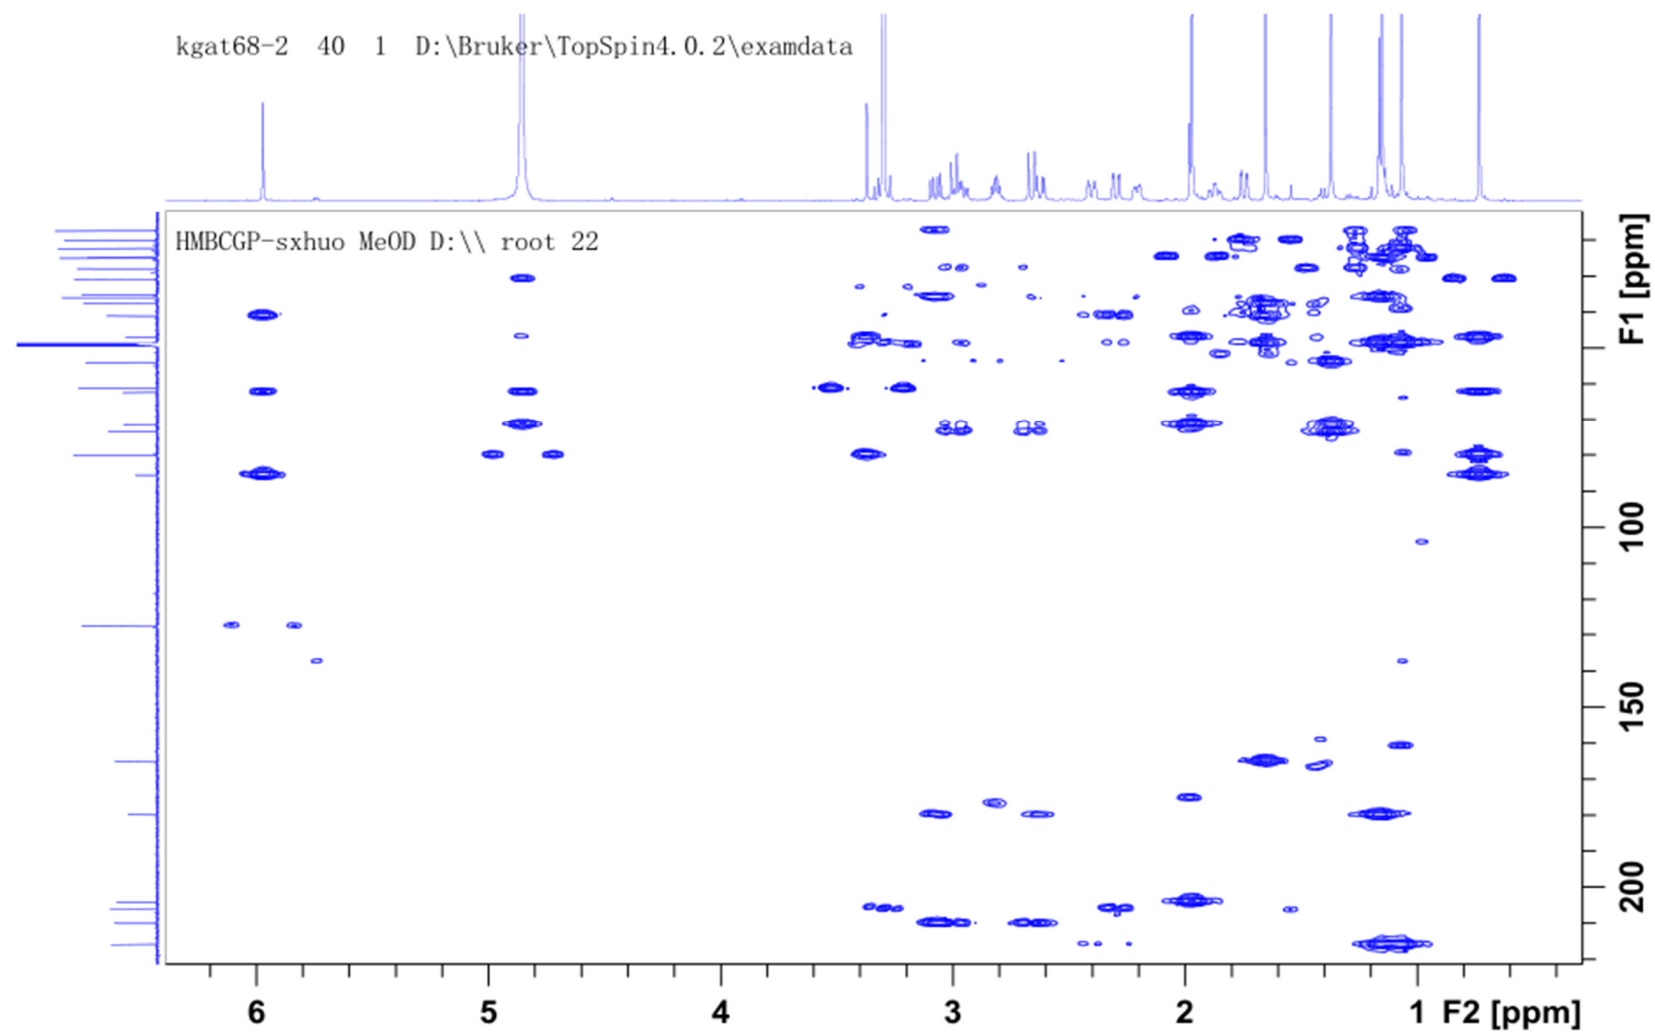



Figure S6. ROESY (600/150 MHz, MeOH-*d*<sub>4</sub>) spectrum of 1.

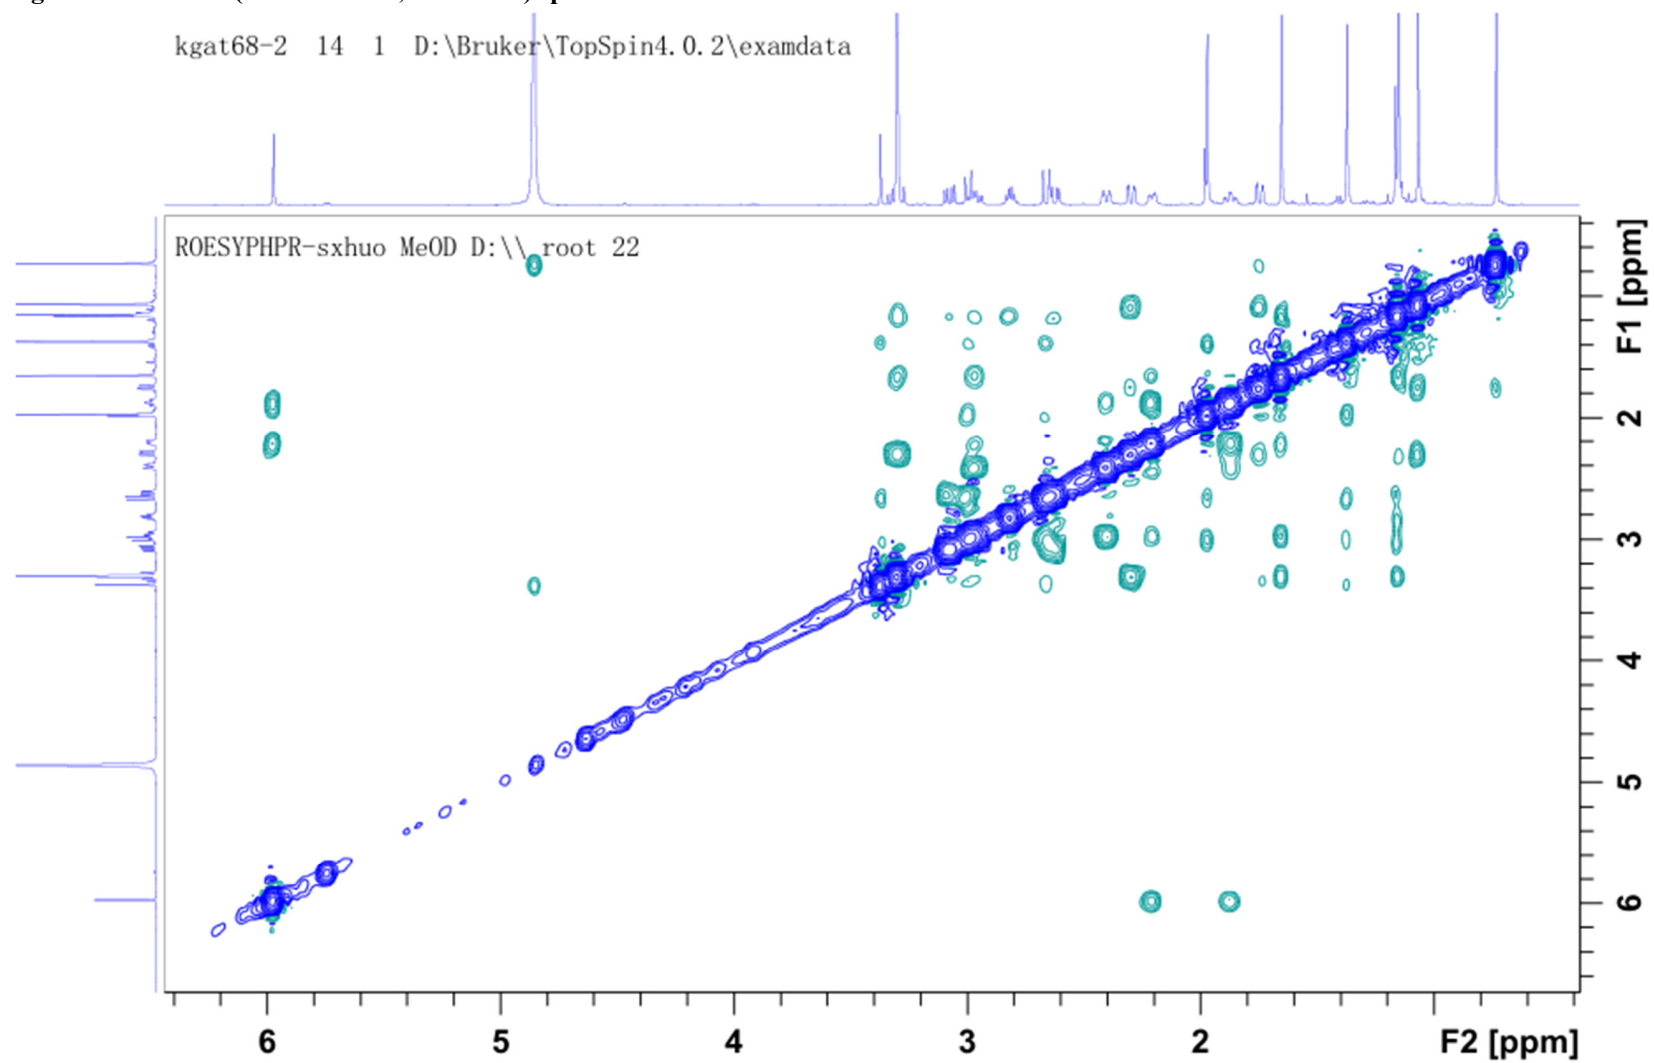

## Section S2: HRESIMS spectrum of 1

Figure S7. HRESIMS spectrum of 1.

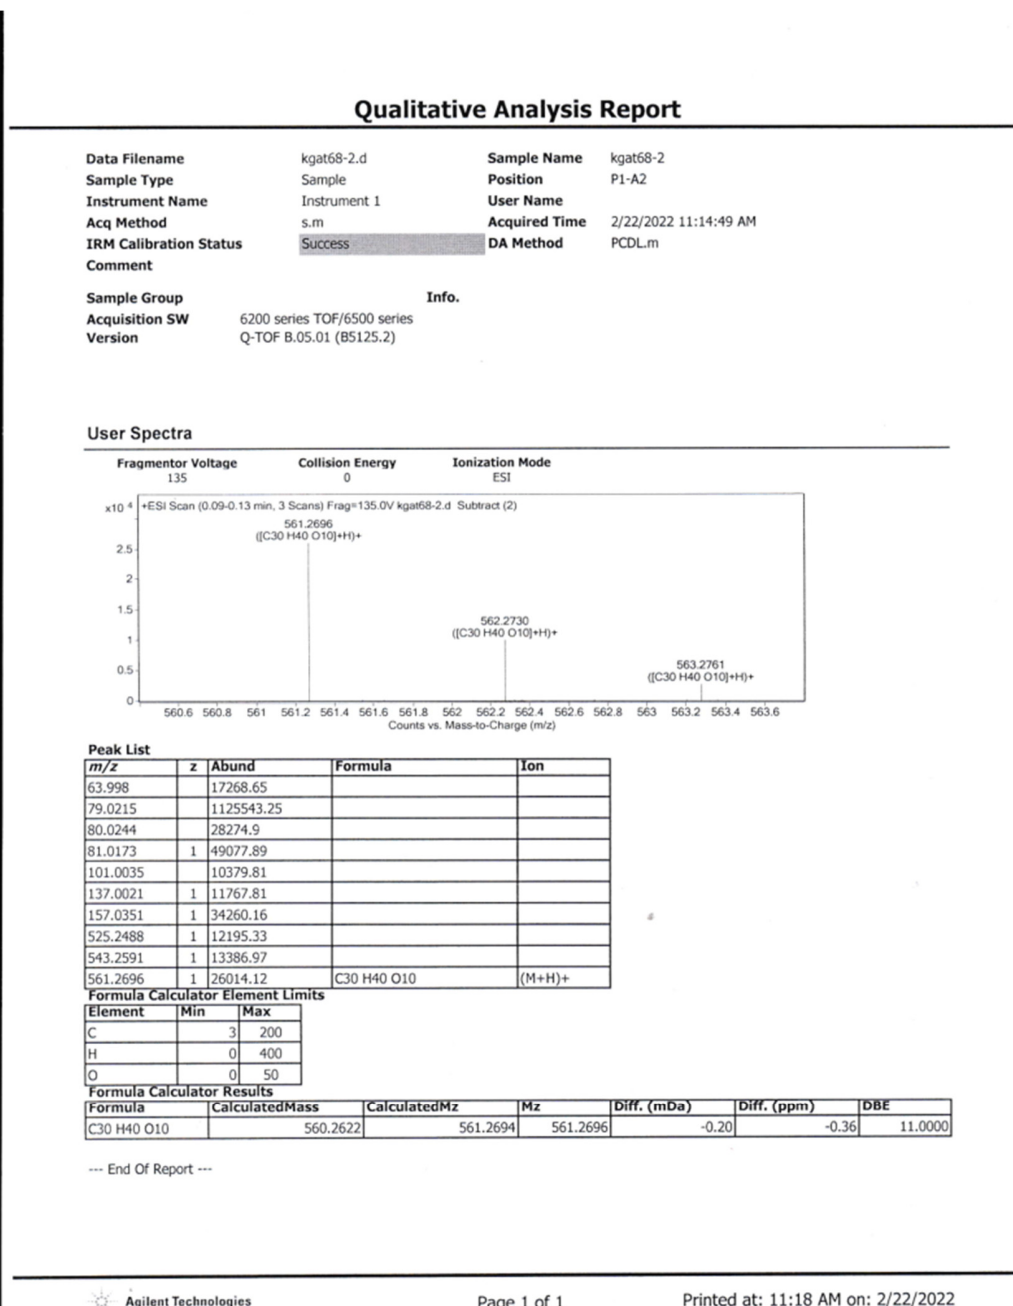

### Section S3: X-ray crystallographic data of 1

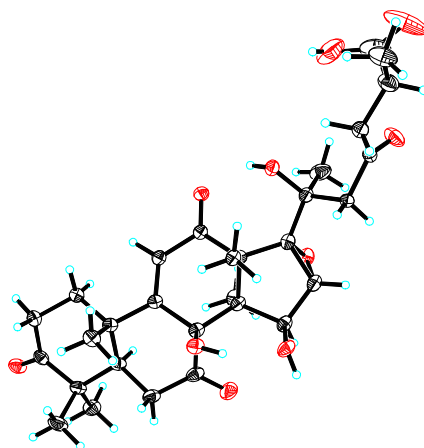

View of a molecule of 1 with the atom-labelling scheme.  
Displacement ellipsoids are drawn at the 30% probability level.

**Table S1. Crystal data and structure refinement for 1.**

|                                   |                                                                                                           |
|-----------------------------------|-----------------------------------------------------------------------------------------------------------|
| Identification code               | global                                                                                                    |
| Empirical formula                 | C <sub>31</sub> H <sub>46</sub> O <sub>12</sub>                                                           |
| Formula weight                    | 610.68                                                                                                    |
| Temperature                       | 100(2) K                                                                                                  |
| Wavelength                        | 1.54178 Å                                                                                                 |
| Crystal system                    | Monoclinic                                                                                                |
| Space group                       | P 1 21 1                                                                                                  |
| Unit cell dimensions              | a = 13.9761(7) Å, $\alpha$ = 90°; b = 6.9089(3) Å, $\beta$ = 90.948(2)°; c = 15.8732(7) Å, $\gamma$ = 90° |
| Volume                            | 1532.50(12) Å <sup>3</sup>                                                                                |
| Z                                 | 2                                                                                                         |
| Density (calculated)              | 1.323 Mg/m <sup>3</sup>                                                                                   |
| Absorption coefficient            | 0.844 mm <sup>-1</sup>                                                                                    |
| F(000)                            | 656                                                                                                       |
| Crystal size                      | 1.050 x 0.140 x 0.120 mm <sup>3</sup>                                                                     |
| Theta range for data collection   | 2.78 to 72.57°                                                                                            |
| Index ranges                      | -17 ≤ h ≤ 17, -8 ≤ k ≤ 8, -19 ≤ l ≤ 19                                                                    |
| Reflections collected             | 26208                                                                                                     |
| Independent reflections           | 5973 [R(int) = 0.0593]                                                                                    |
| Completeness to theta = 72.57°    | 99.6 %                                                                                                    |
| Absorption correction             | Semi-empirical from equivalents                                                                           |
| Max. and min. transmission        | 0.91 and 0.62                                                                                             |
| Refinement method                 | Full-matrix least-squares on F <sup>2</sup>                                                               |
| Data / restraints / parameters    | 5973 / 352 / 506                                                                                          |
| Goodness-of-fit on F <sup>2</sup> | 1.042                                                                                                     |
| Final R indices [I > 2σ(I)]       | R1 = 0.0504, wR2 = 0.1381                                                                                 |
| R indices (all data)              | R1 = 0.0543, wR2 = 0.1436                                                                                 |
| Absolute structure parameter      | 0.07(9)                                                                                                   |
| Largest diff. peak and hole       | 0.372 and -0.254 e.Å <sup>-3</sup>                                                                        |

## Section S4: 1D and 2D NMR spectra of compound 2

Figure S8.  $^1\text{H}$  NMR (600 MHz,  $\text{MeOH-}d_4$ ) spectrum of 2.

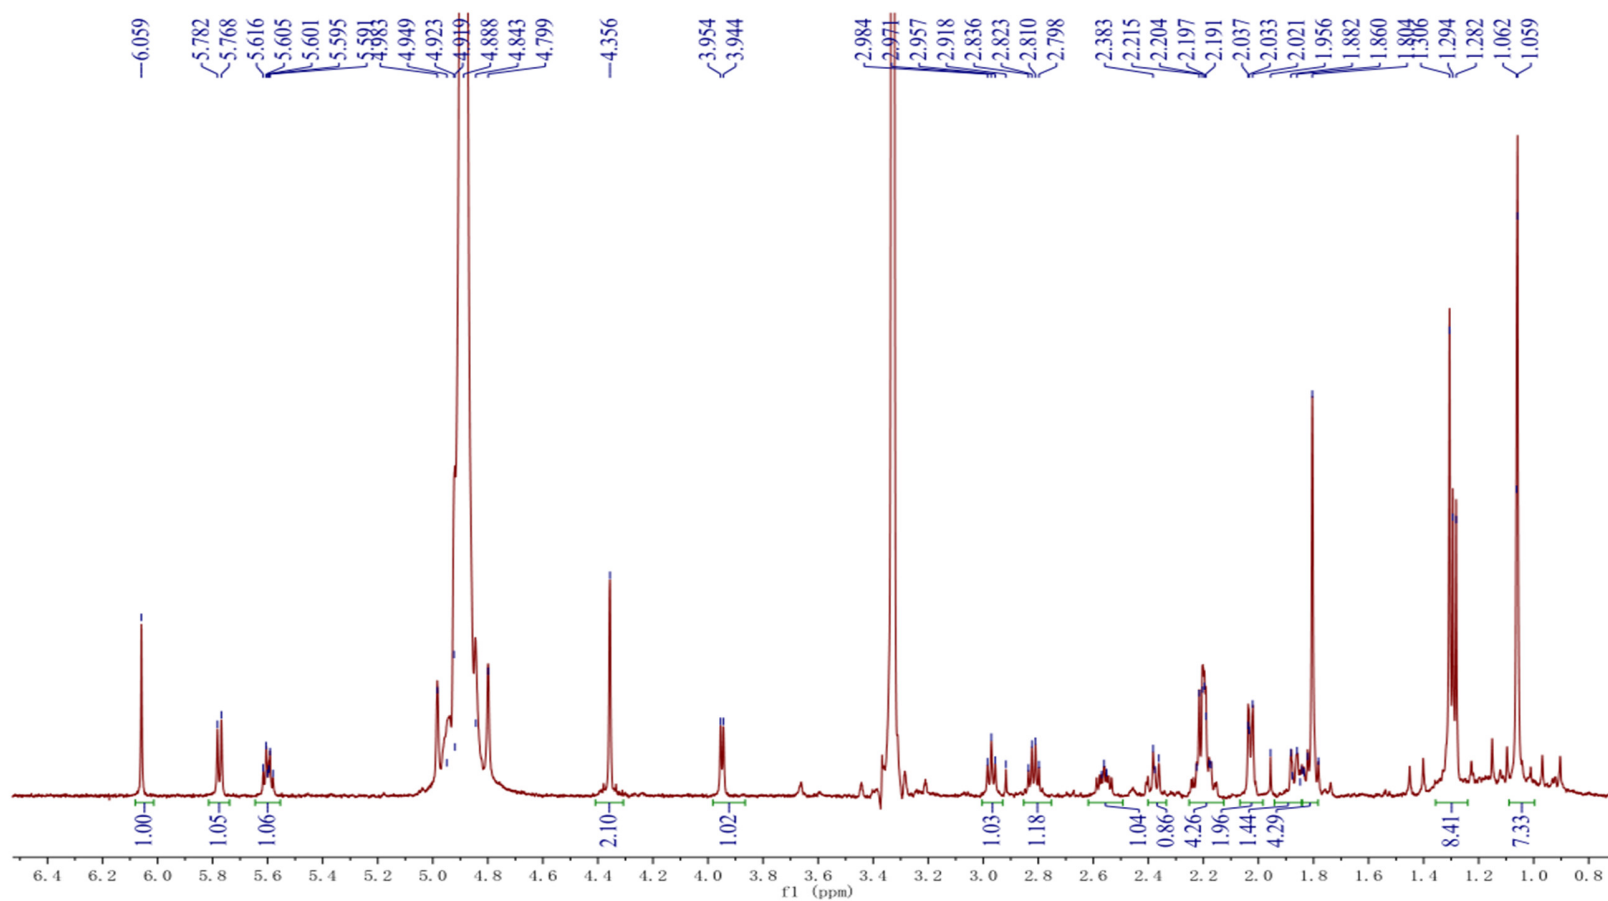

Figure S9.  $^{13}\text{C}$  NMR (150 MHz,  $\text{MeOH-}d_4$ ) spectrum of 2.

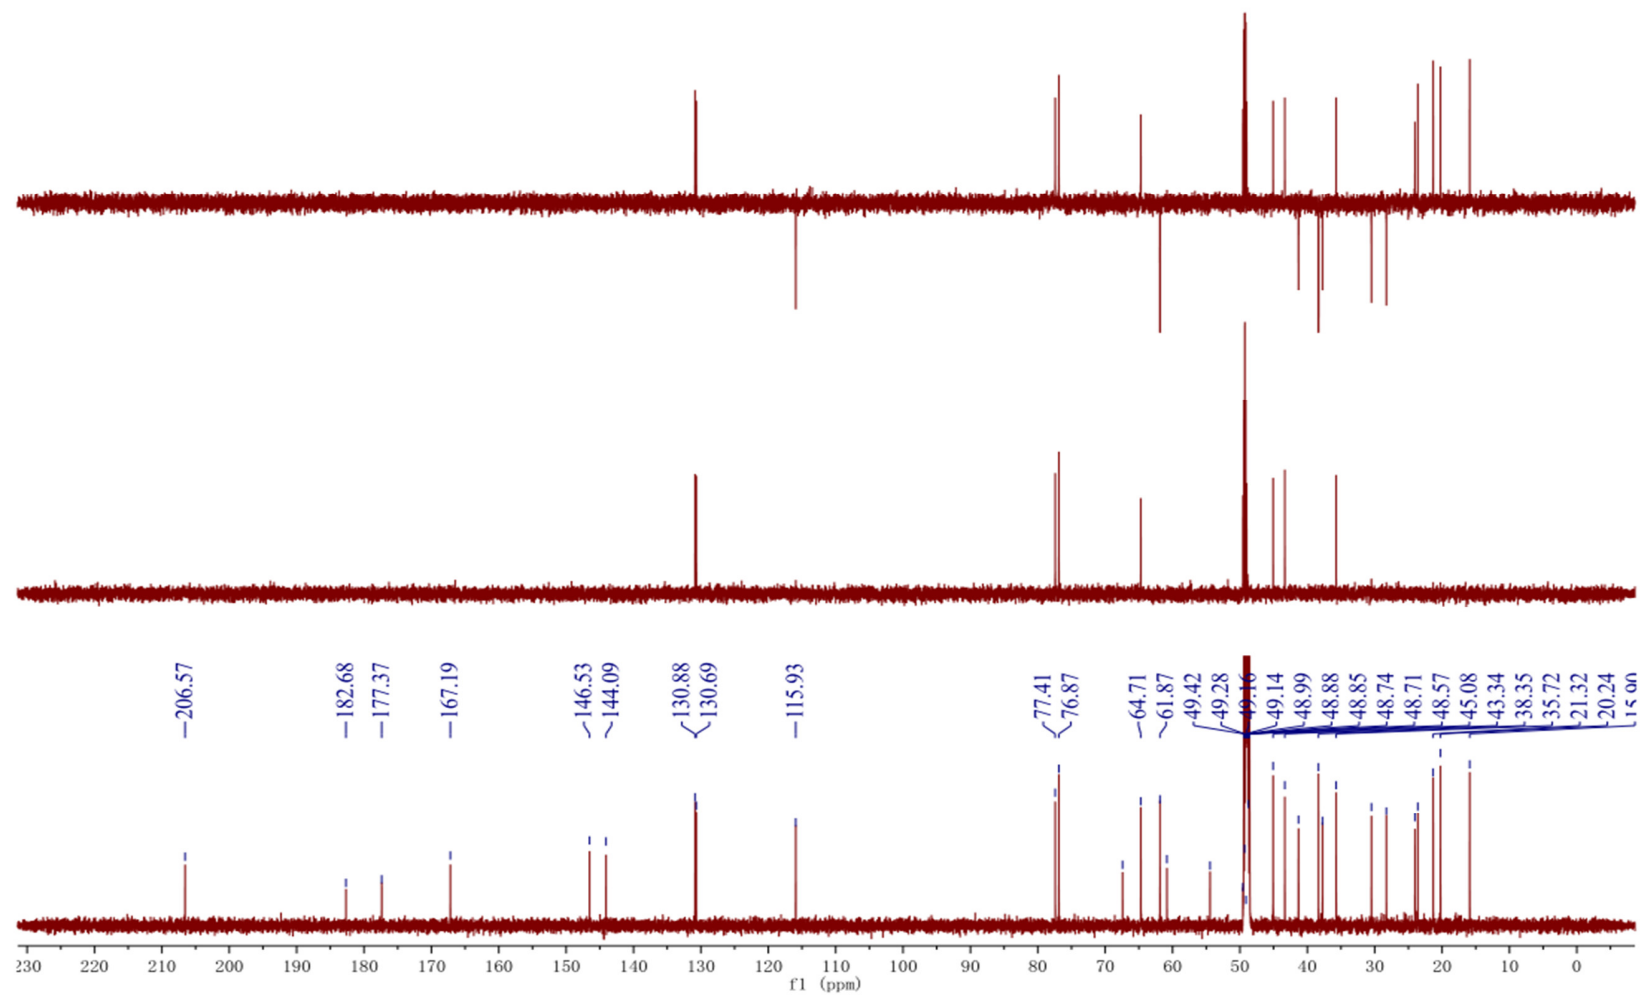

Figure S10.  $^1\text{H}$ - $^1\text{H}$  COSY (600 MHz,  $\text{MeOH-}d_4$ ) spectrum of 2.

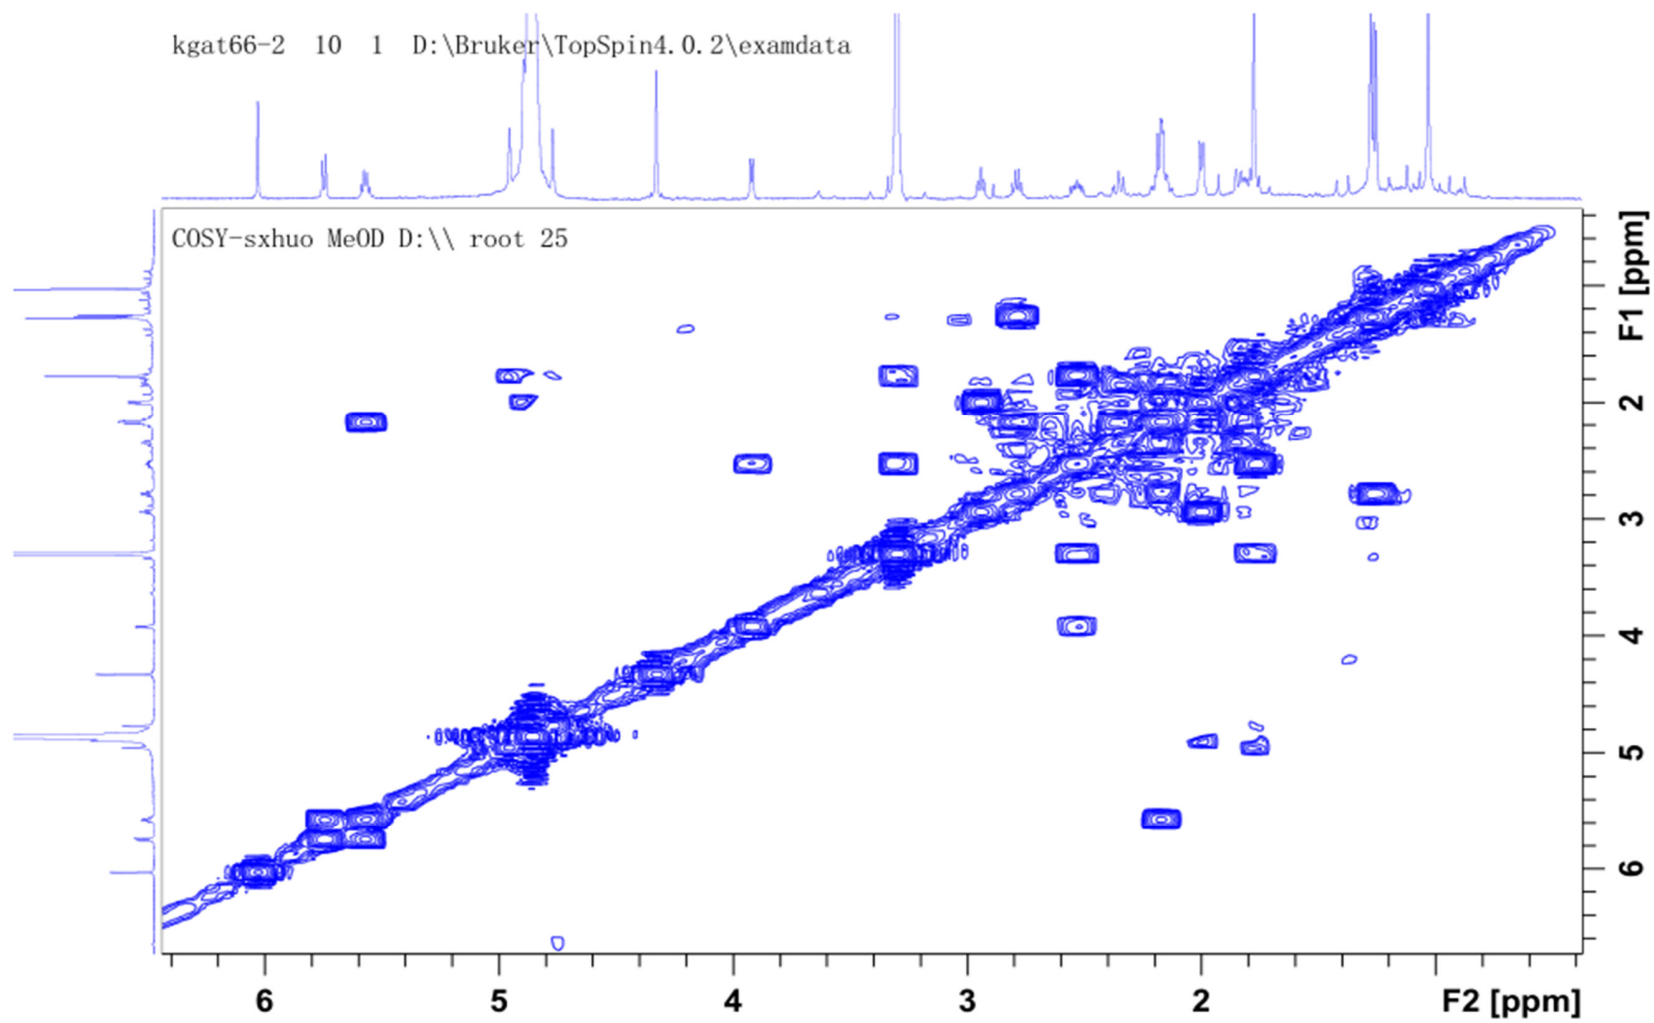

Figure S11. HSQC (600/150 MHz, MeOH-*d*<sub>4</sub>) spectrum of 2.

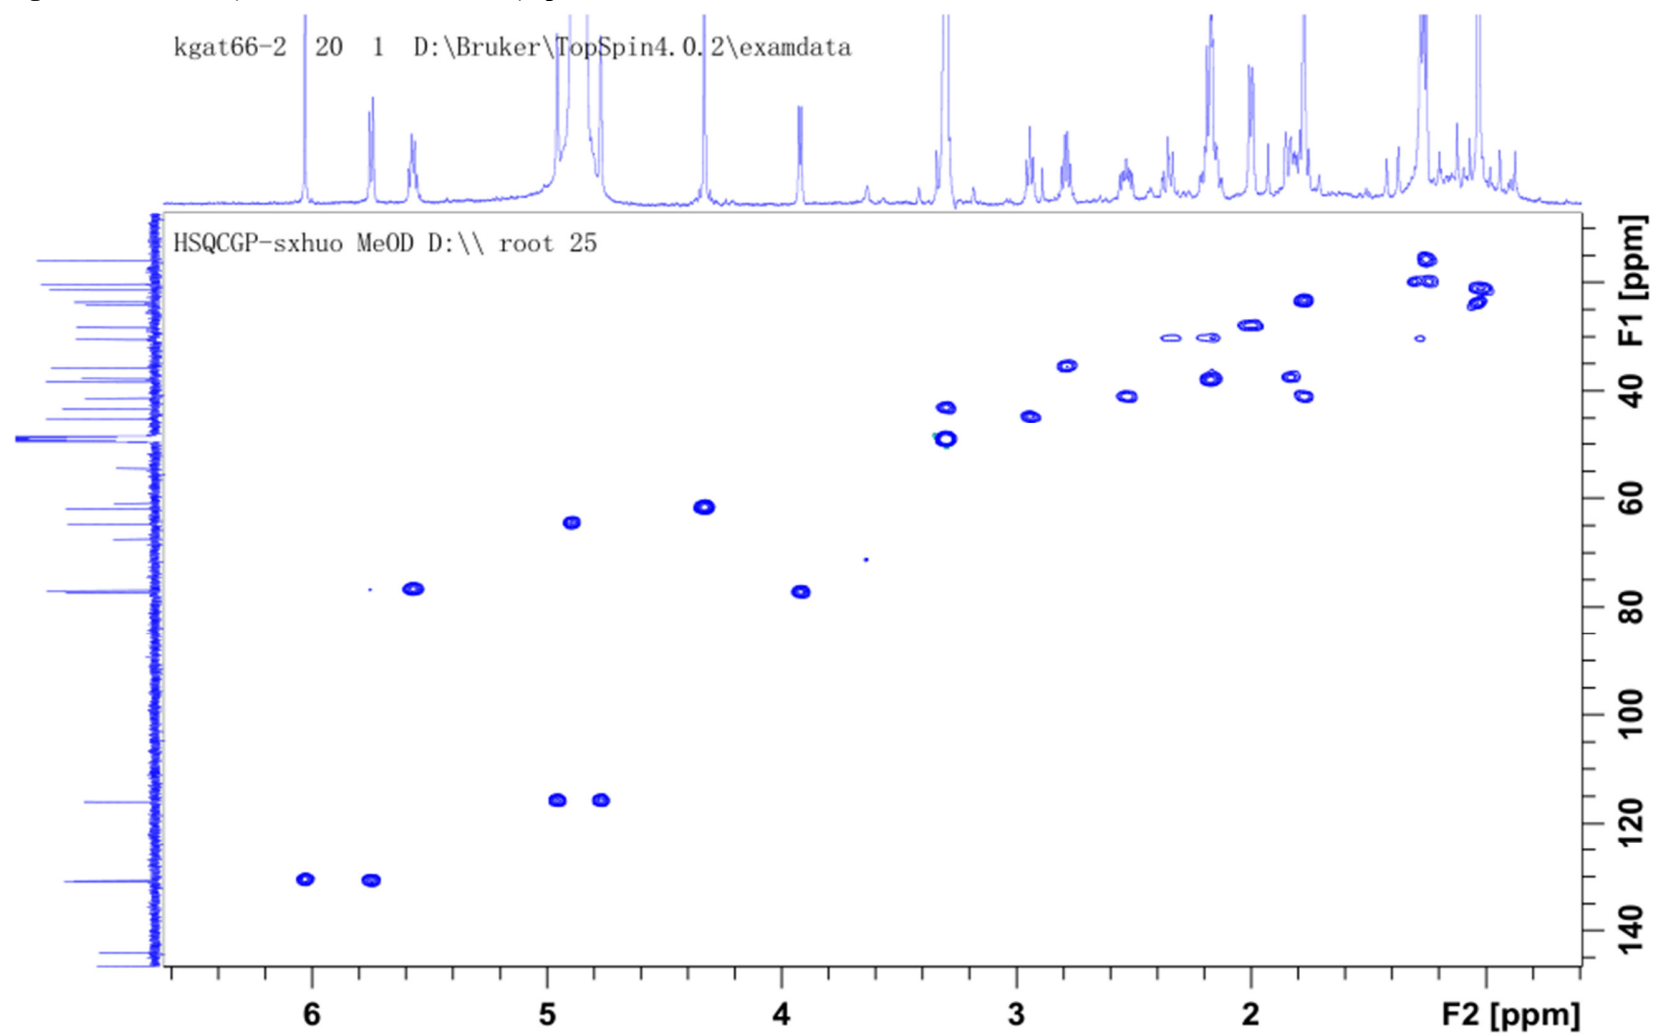



Figure S12. HMBC (600/150 MHz, MeOH-*d*<sub>4</sub>) spectrum of 2.

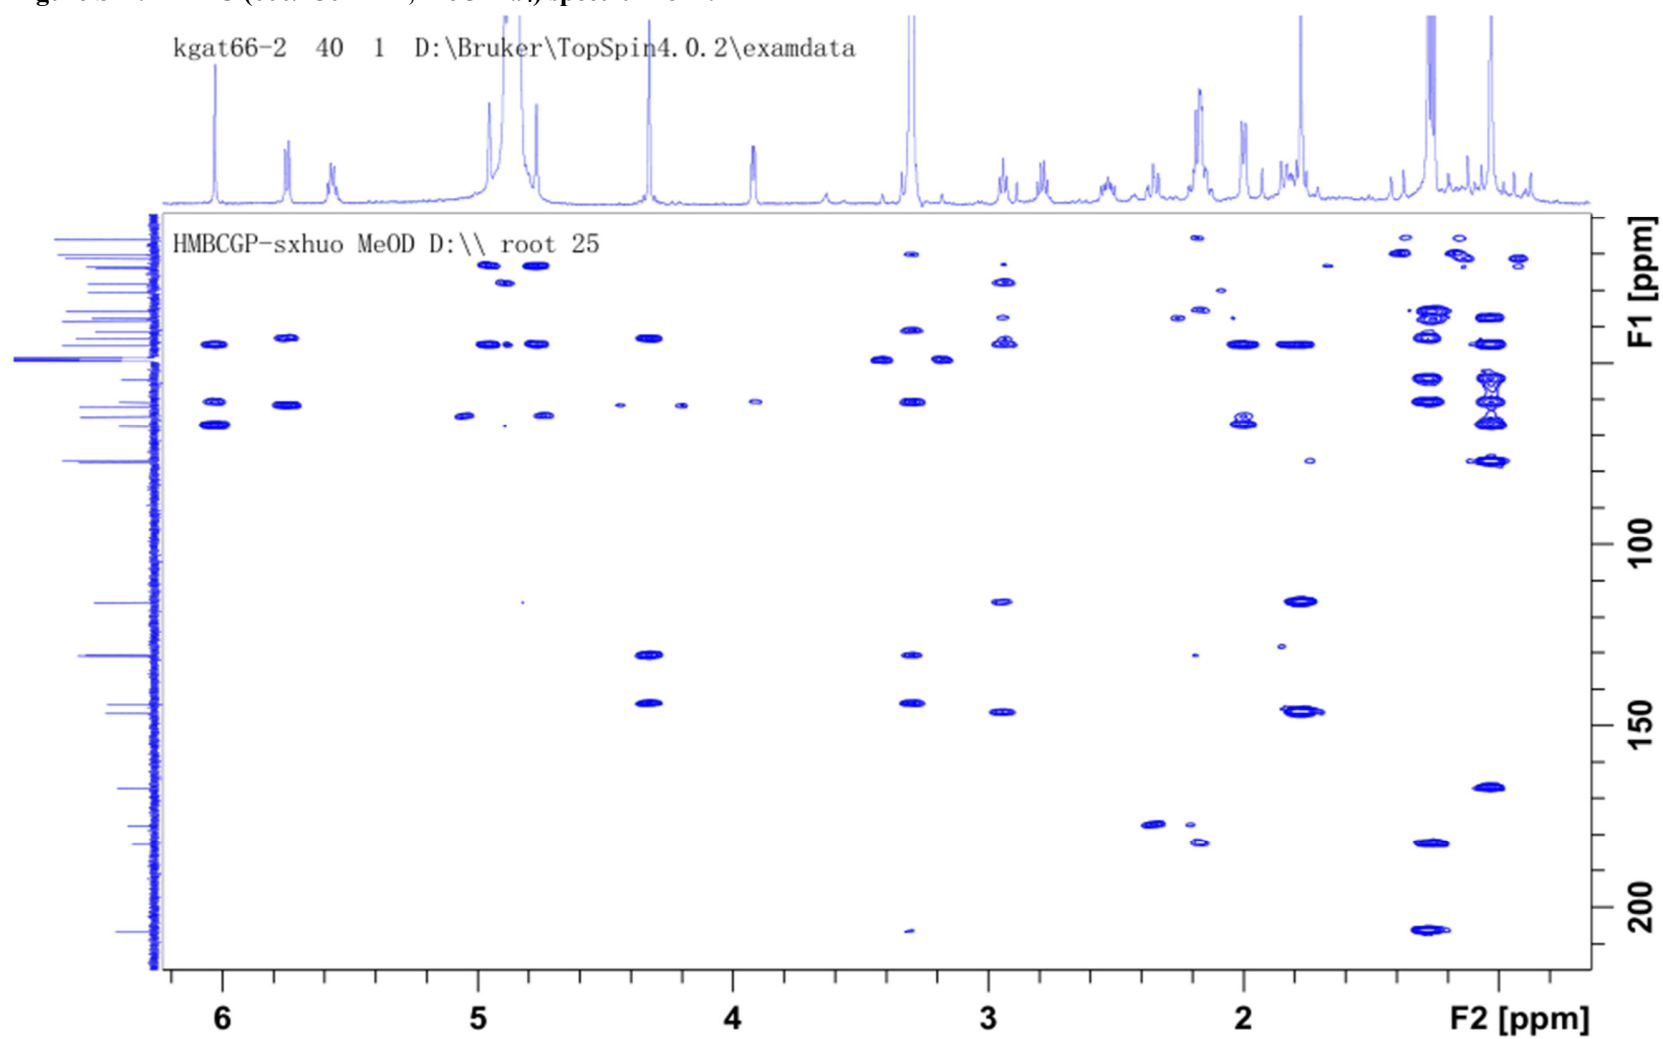



**Section S5: HRESIMS spectrum of 2**

**Figure S14. HRESIMS spectrum of 2.**

### Qualitative Analysis Report

|                               |              |                      |                     |
|-------------------------------|--------------|----------------------|---------------------|
| <b>Data Filename</b>          | kgat66-2.d   | <b>Sample Name</b>   | kgat66-2            |
| <b>Sample Type</b>            | Sample       | <b>Position</b>      | P1-A4               |
| <b>Instrument Name</b>        | Instrument 1 | <b>User Name</b>     |                     |
| <b>Acq Method</b>             | s-.m         | <b>Acquired Time</b> | 7/9/2021 2:54:52 PM |
| <b>IRM Calibration Status</b> | Success      | <b>DA Method</b>     | Default.m           |
| <b>Comment</b>                |              |                      |                     |

  

|                       |                             |              |
|-----------------------|-----------------------------|--------------|
| <b>Sample Group</b>   |                             | <b>Info.</b> |
| <b>Acquisition SW</b> | 6200 series TOF/6500 series |              |
| <b>Version</b>        | Q-TOF B.05.01 (B5125.2)     |              |

#### User Spectra

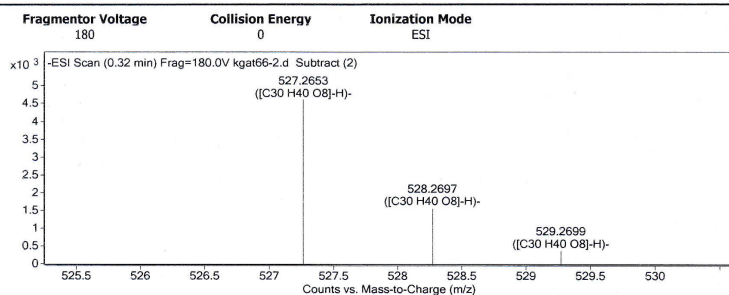

#### Peak List

| m/z       | z | Abund   | Formula    | Ion    |
|-----------|---|---------|------------|--------|
| 324.9885  |   | 348.81  |            |        |
| 447.5934  |   | 347.95  |            |        |
| 448.9755  |   | 365.66  |            |        |
| 500.3118  |   | 352.77  |            |        |
| 527.2653  | 1 | 4608.72 | C30 H40 O8 | (M-H)- |
| 528.2697  | 1 | 1573.13 | C30 H40 O8 | (M-H)- |
| 529.2699  | 1 | 360.96  | C30 H40 O8 | (M-H)- |
| 573.2709  |   | 593.19  |            |        |
| 595.2445  |   | 440.07  |            |        |
| 948.0079  |   | 444.48  |            |        |
| 1071.9621 |   | 314.56  |            |        |
| 1306.9568 |   | 366.34  |            |        |

#### Formula Calculator Element Limits

| Element | Min | Max |
|---------|-----|-----|
| C       | 3   | 60  |
| H       | 0   | 120 |
| O       | 0   | 30  |

#### Formula Calculator Results

| Formula    | CalculatedMass | CalculatedMz | Mz       | Diff. (mDa) | Diff. (ppm) | DBE     |
|------------|----------------|--------------|----------|-------------|-------------|---------|
| C30 H40 O8 | 528.2723       | 527.2650     | 527.2653 | -0.30       | -0.57       | 11.0000 |

--- End Of Report ---

## Section S6: 1D and 2D NMR spectra of compound 3

Figure S15.  $^1\text{H}$  NMR (600 MHz,  $\text{MeOH-}d_4$ ) spectrum of 3.

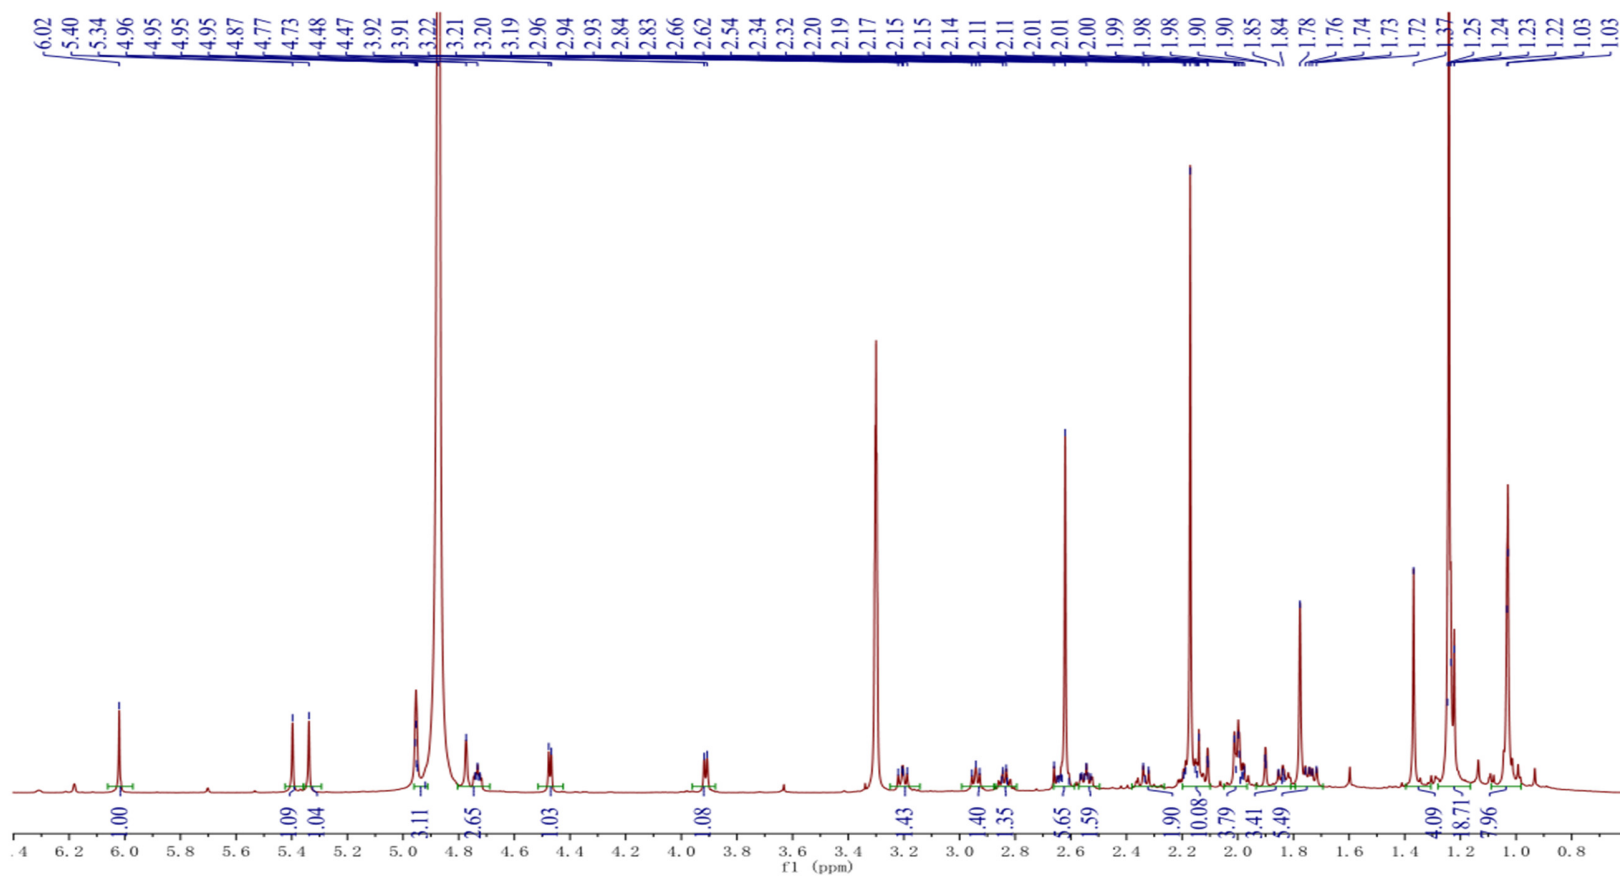

Figure S16.  $^{13}\text{C}$  NMR (150 MHz,  $\text{MeOH-}d_4$ ) spectrum of 3.

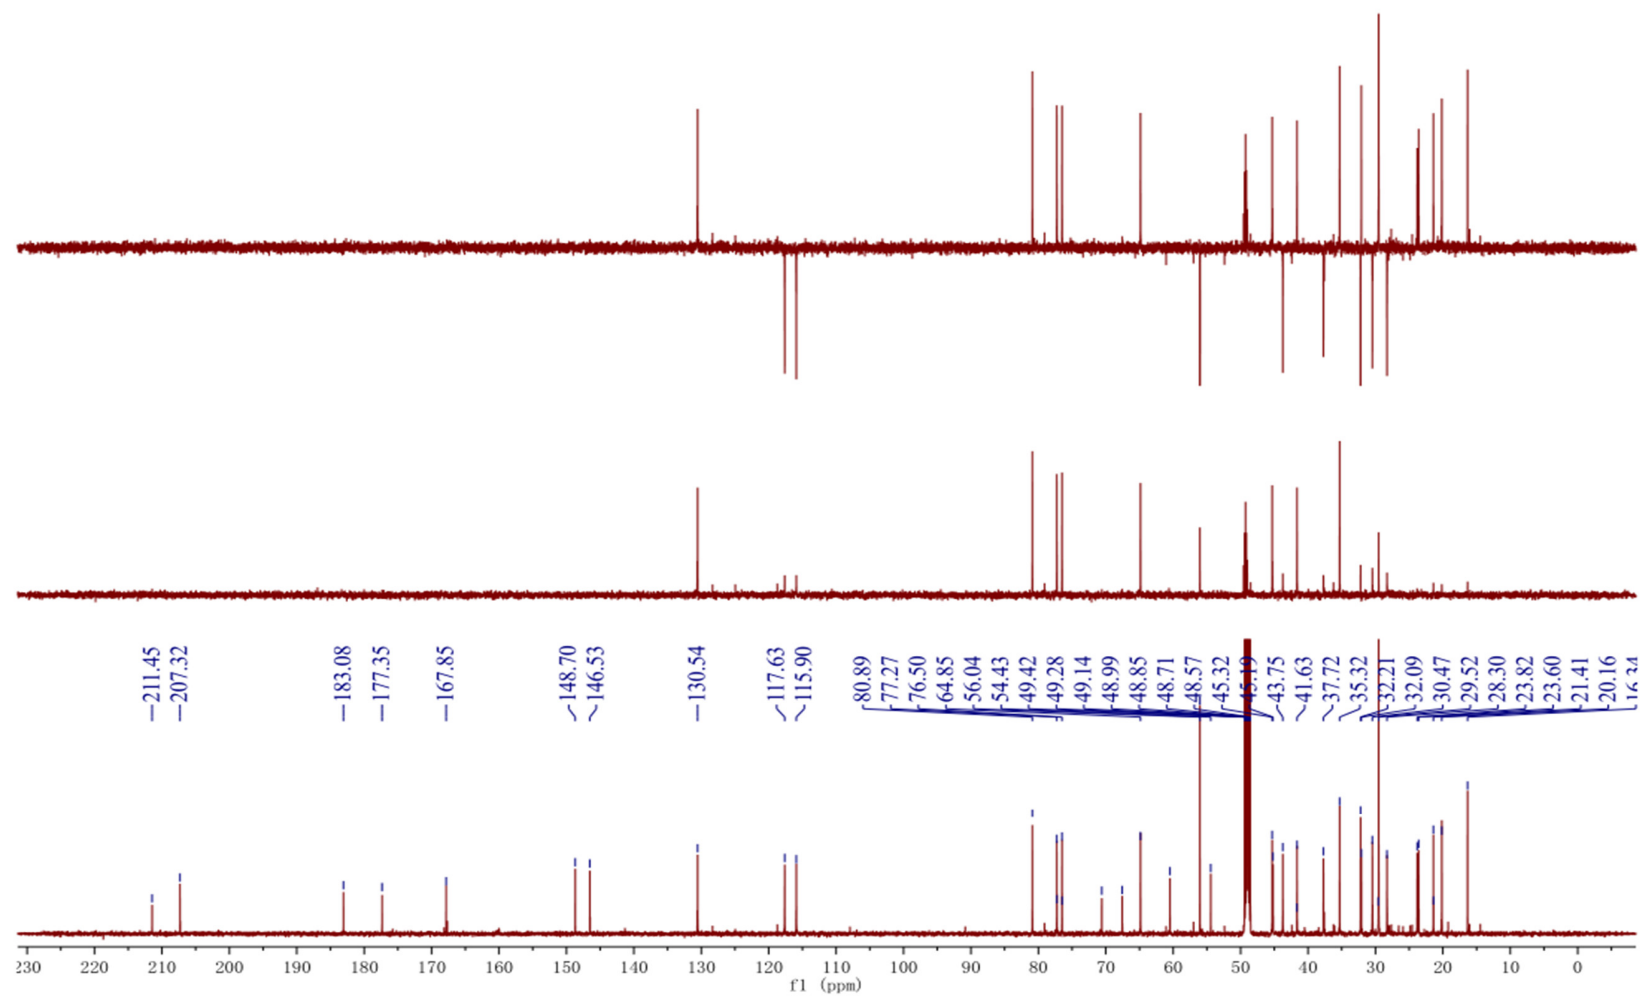

Figure S17.  $^1\text{H}$ - $^1\text{H}$  COSY (600 MHz,  $\text{MeOH-}d_4$ ) spectrum of 3.

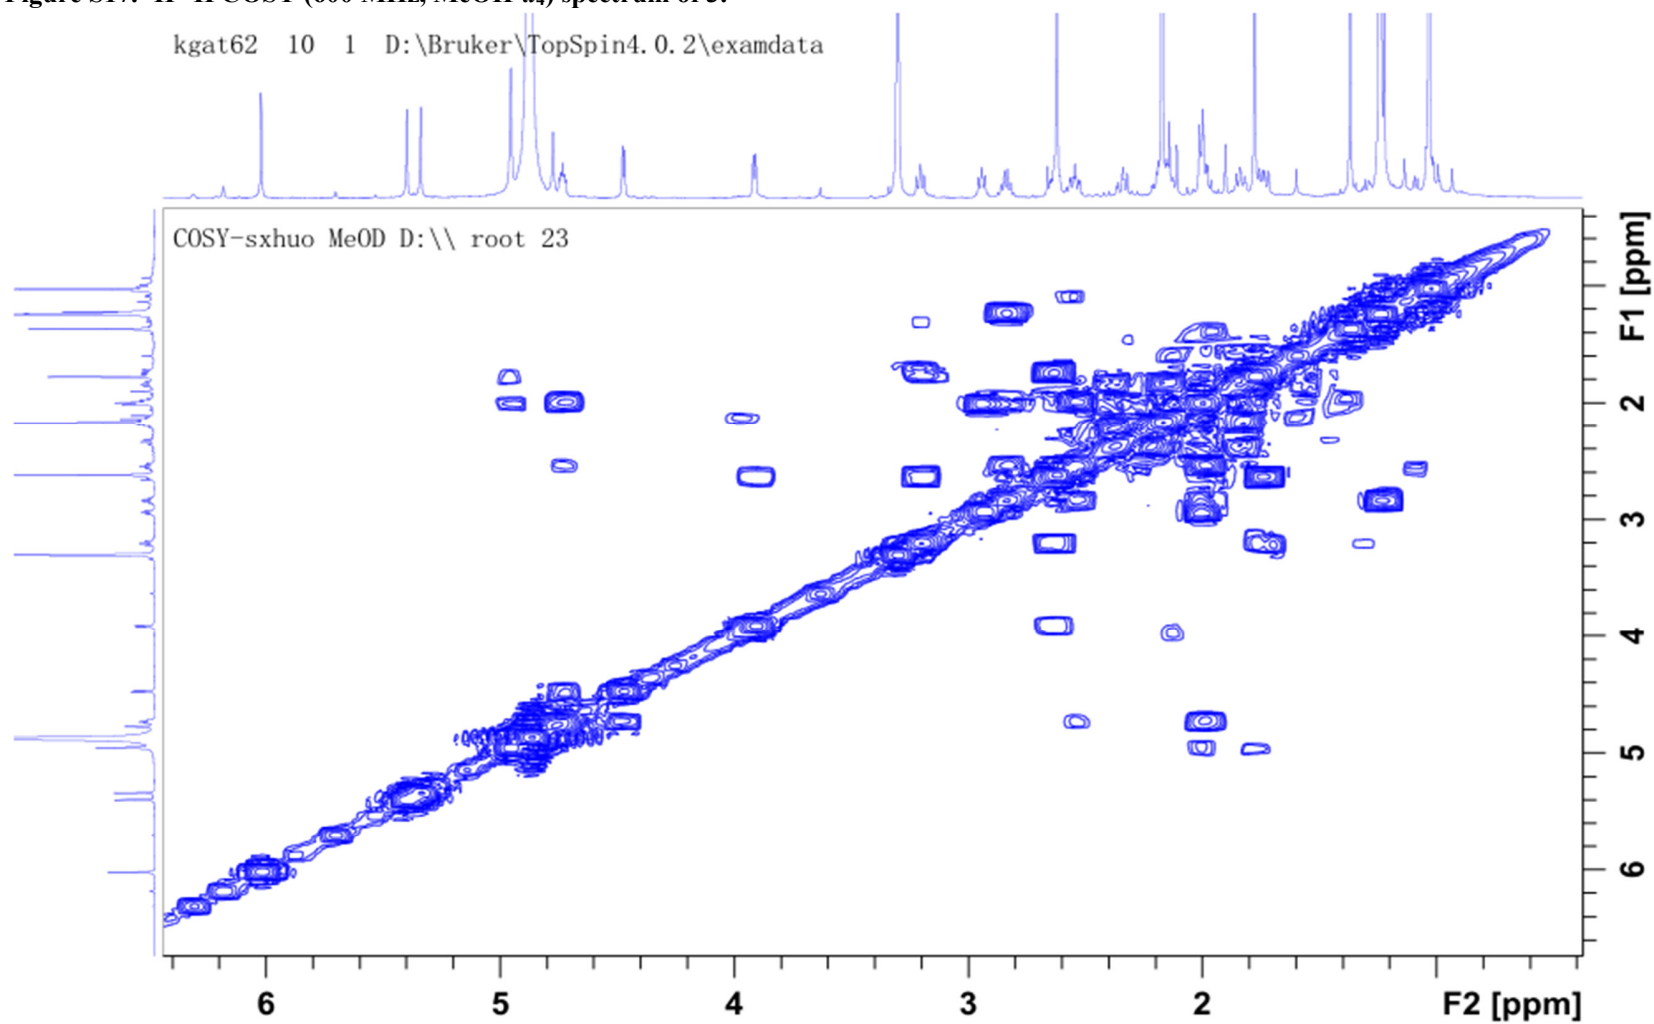

Figure S18. HSQC (600/150 MHz, MeOH-*d*<sub>4</sub>) spectrum of 3.

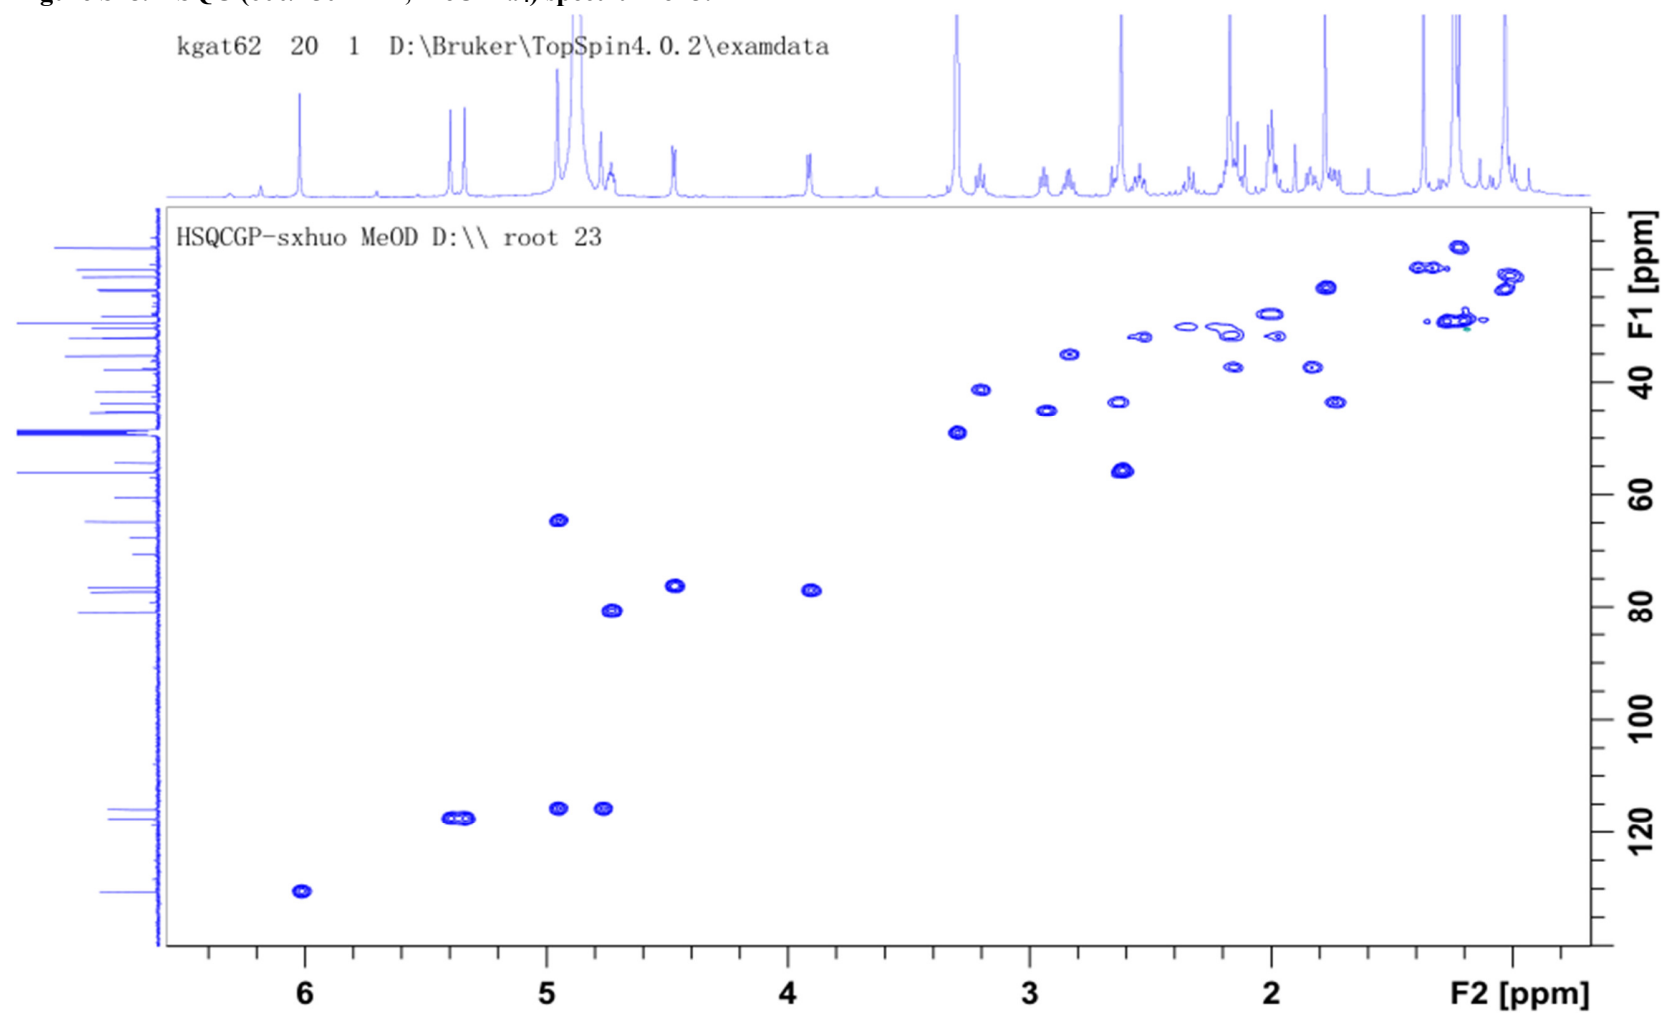

Figure S19. HMBC (600/150 MHz, MeOH-*d*<sub>4</sub>) spectrum of 3.

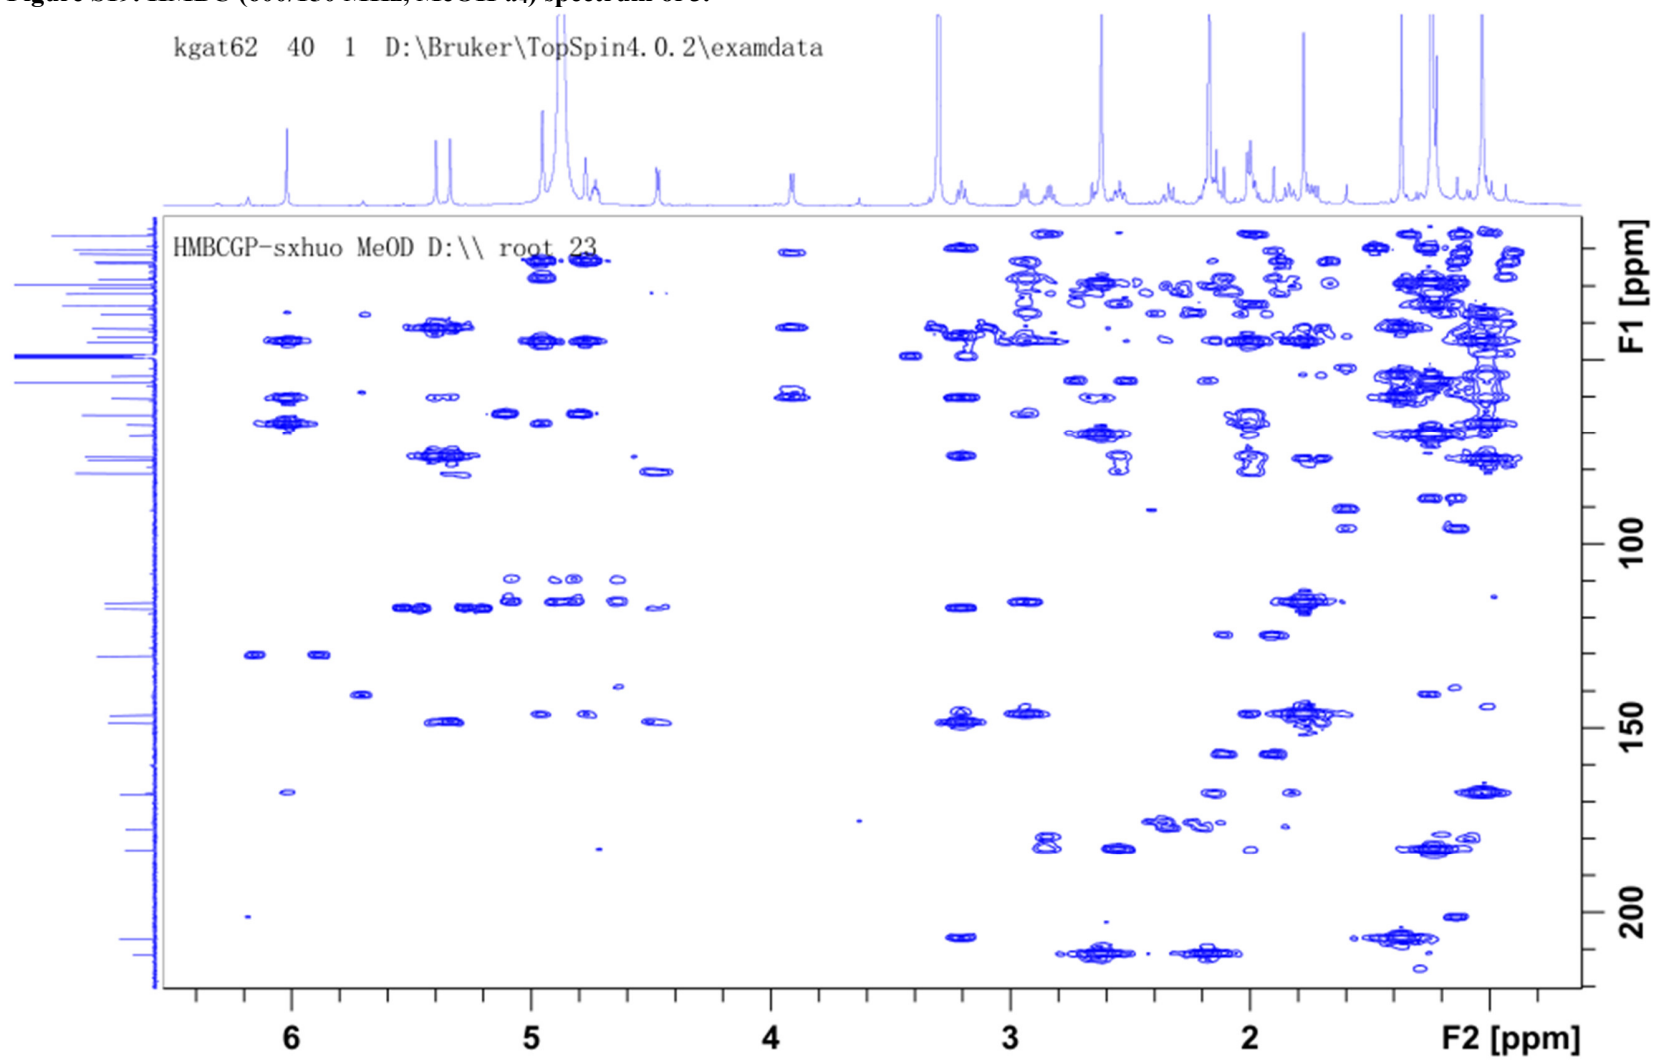



Figure S20. ROESY (600/150 MHz, MeOH-*d*<sub>4</sub>) spectrum of 3.

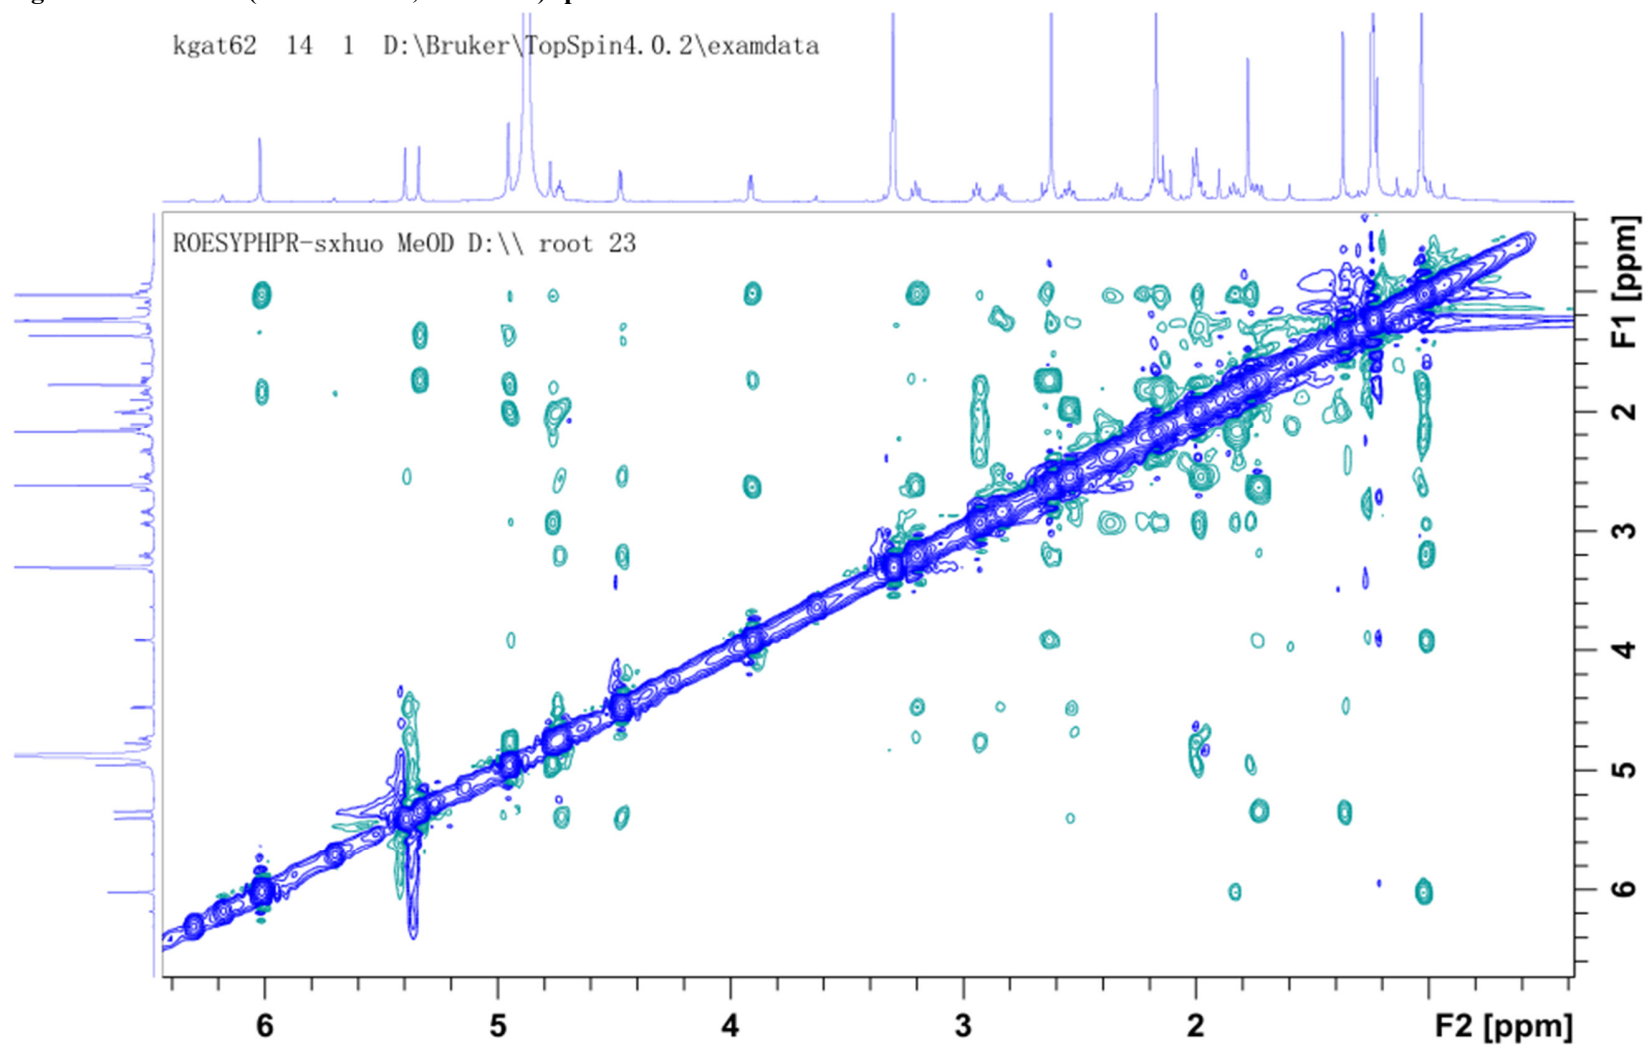

## Section S7: HRESIMS spectrum of 3

Figure S21. HRESIMS spectrum of 3.

### Qualitative Analysis Report

|                               |              |                      |                       |
|-------------------------------|--------------|----------------------|-----------------------|
| <b>Data Filename</b>          | kgat62.d     | <b>Sample Name</b>   | kgat62                |
| <b>Sample Type</b>            | Sample       | <b>Position</b>      | P1-A4                 |
| <b>Instrument Name</b>        | Instrument 1 | <b>User Name</b>     |                       |
| <b>Acq Method</b>             | s-.m         | <b>Acquired Time</b> | 5/19/2021 10:40:04 AM |
| <b>IRM Calibration Status</b> | Success      | <b>DA Method</b>     | Default.m             |
| <b>Comment</b>                |              |                      |                       |

  

|                       |                             |              |
|-----------------------|-----------------------------|--------------|
| <b>Sample Group</b>   |                             | <b>Info.</b> |
| <b>Acquisition SW</b> | 6200 series TOF/6500 series |              |
| <b>Version</b>        | Q-TOF B.05.01 (B5125.2)     |              |

### User Spectra

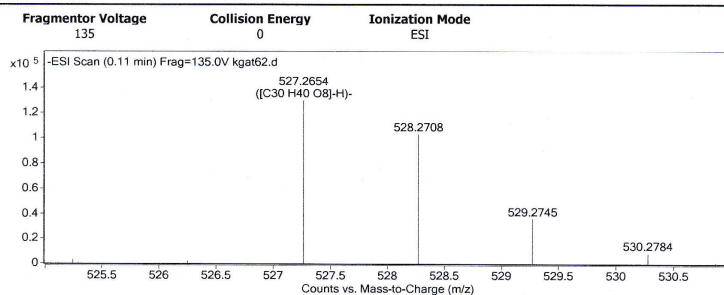

### Peak List

| m/z       | z | Abund     | Formula    | Ion    |
|-----------|---|-----------|------------|--------|
| 112.9856  |   | 326571.84 |            |        |
| 527.2654  |   | 129859.75 | C30 H40 O8 | (M-H)- |
| 528.2708  | 1 | 102946.99 |            |        |
| 544.2997  |   | 99789.67  |            |        |
| 545.306   | 1 | 271520.28 |            |        |
| 573.2709  | 1 | 99540.22  |            |        |
| 590.3058  | 1 | 644088.69 |            |        |
| 591.309   | 1 | 201983.73 |            |        |
| 1033.9885 | 1 | 247649.55 |            |        |
| 1055.5377 | 1 | 109539.64 |            |        |
| 1072.572  | 1 | 365939.16 |            |        |
| 1073.5753 | 1 | 247403.97 |            |        |

### Formula Calculator Element Limits

| Element | Min | Max |
|---------|-----|-----|
| C       | 3   | 60  |
| H       | 0   | 120 |
| O       | 0   | 30  |

### Formula Calculator Results

| Formula    | CalculatedMass | CalculatedMz | Mz       | Diff. (mDa) | Diff. (ppm) | DBE     |
|------------|----------------|--------------|----------|-------------|-------------|---------|
| C30 H40 O8 | 528.2723       | 527.2650     | 527.2654 | -0.40       | -0.76       | 11.0000 |

--- End Of Report ---

## Section S8: 1D and 2D NMR spectra of compound 4

Figure S22.  $^1\text{H}$  NMR (600 MHz,  $\text{MeOH-}d_4$ ) spectrum of 4.

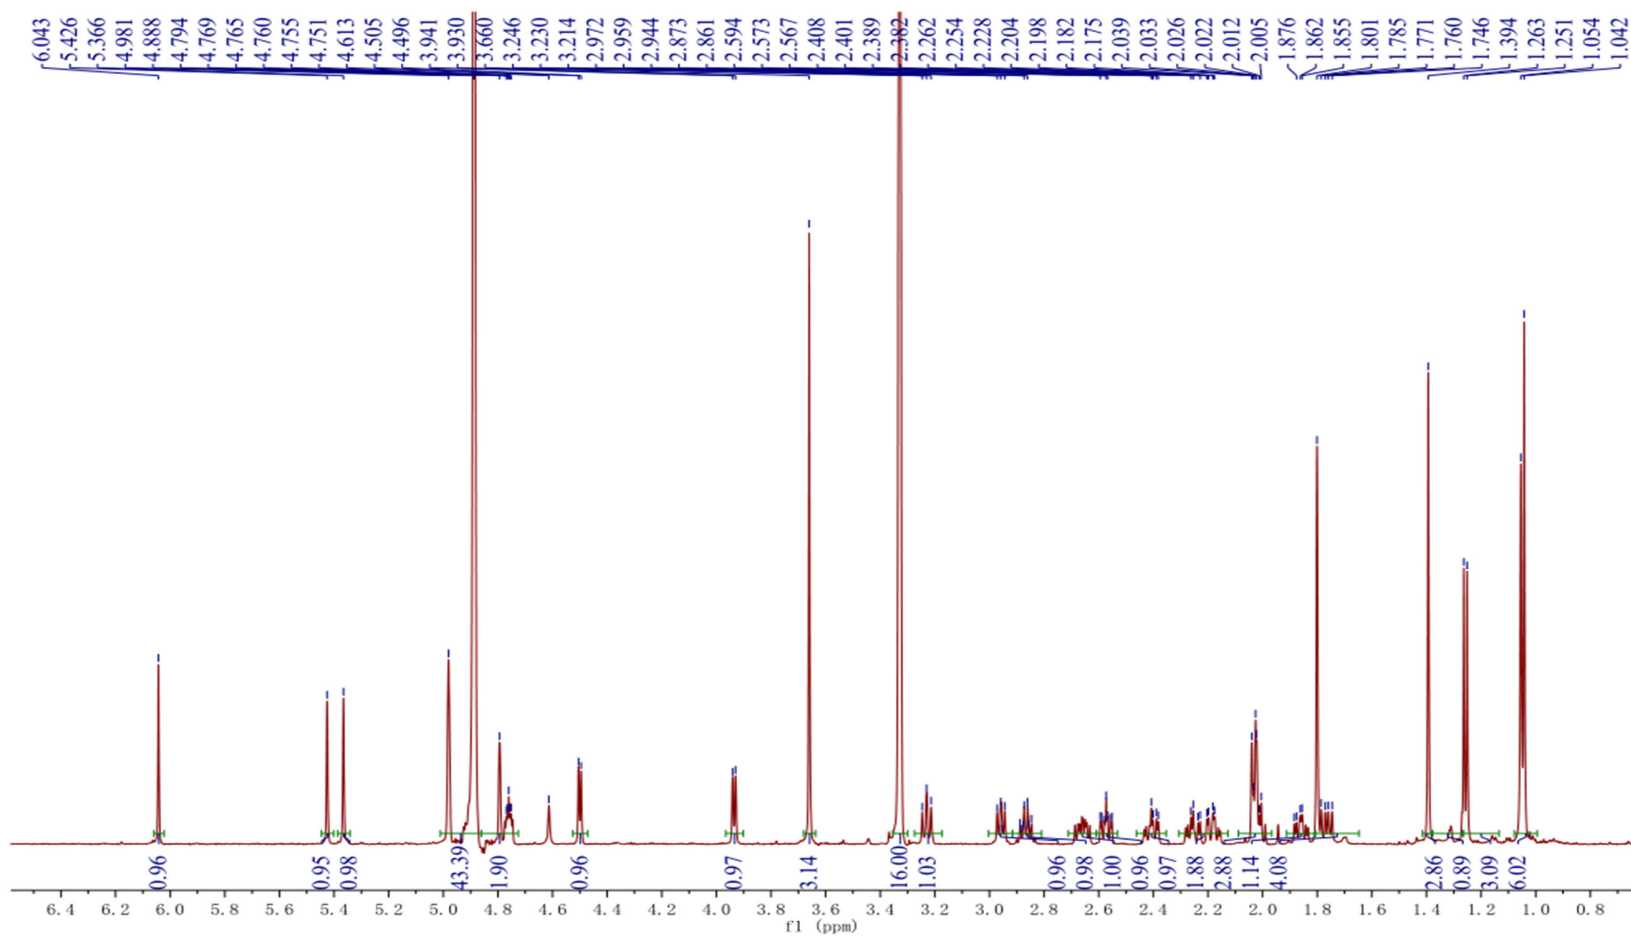

Figure S23.  $^{13}\text{C}$  NMR (150 MHz,  $\text{MeOH-}d_4$ ) spectrum of 4.

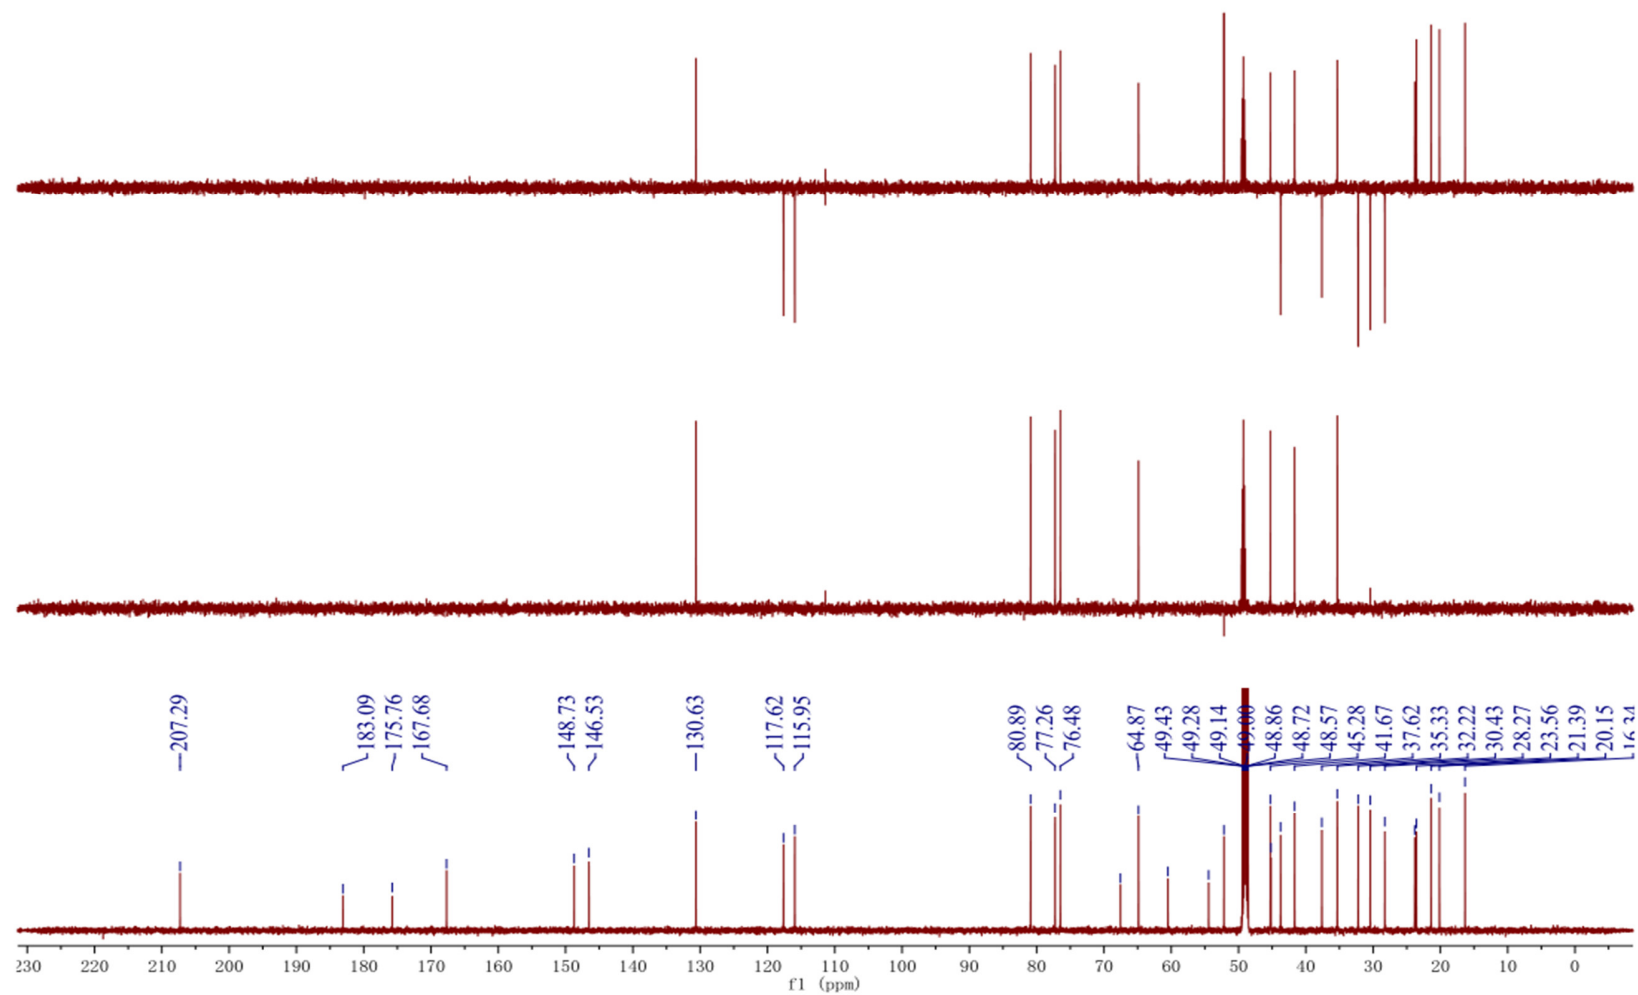

Figure S24.  $^1\text{H}$ - $^1\text{H}$  COSY (600 MHz,  $\text{MeOH-}d_4$ ) spectrum of 4.

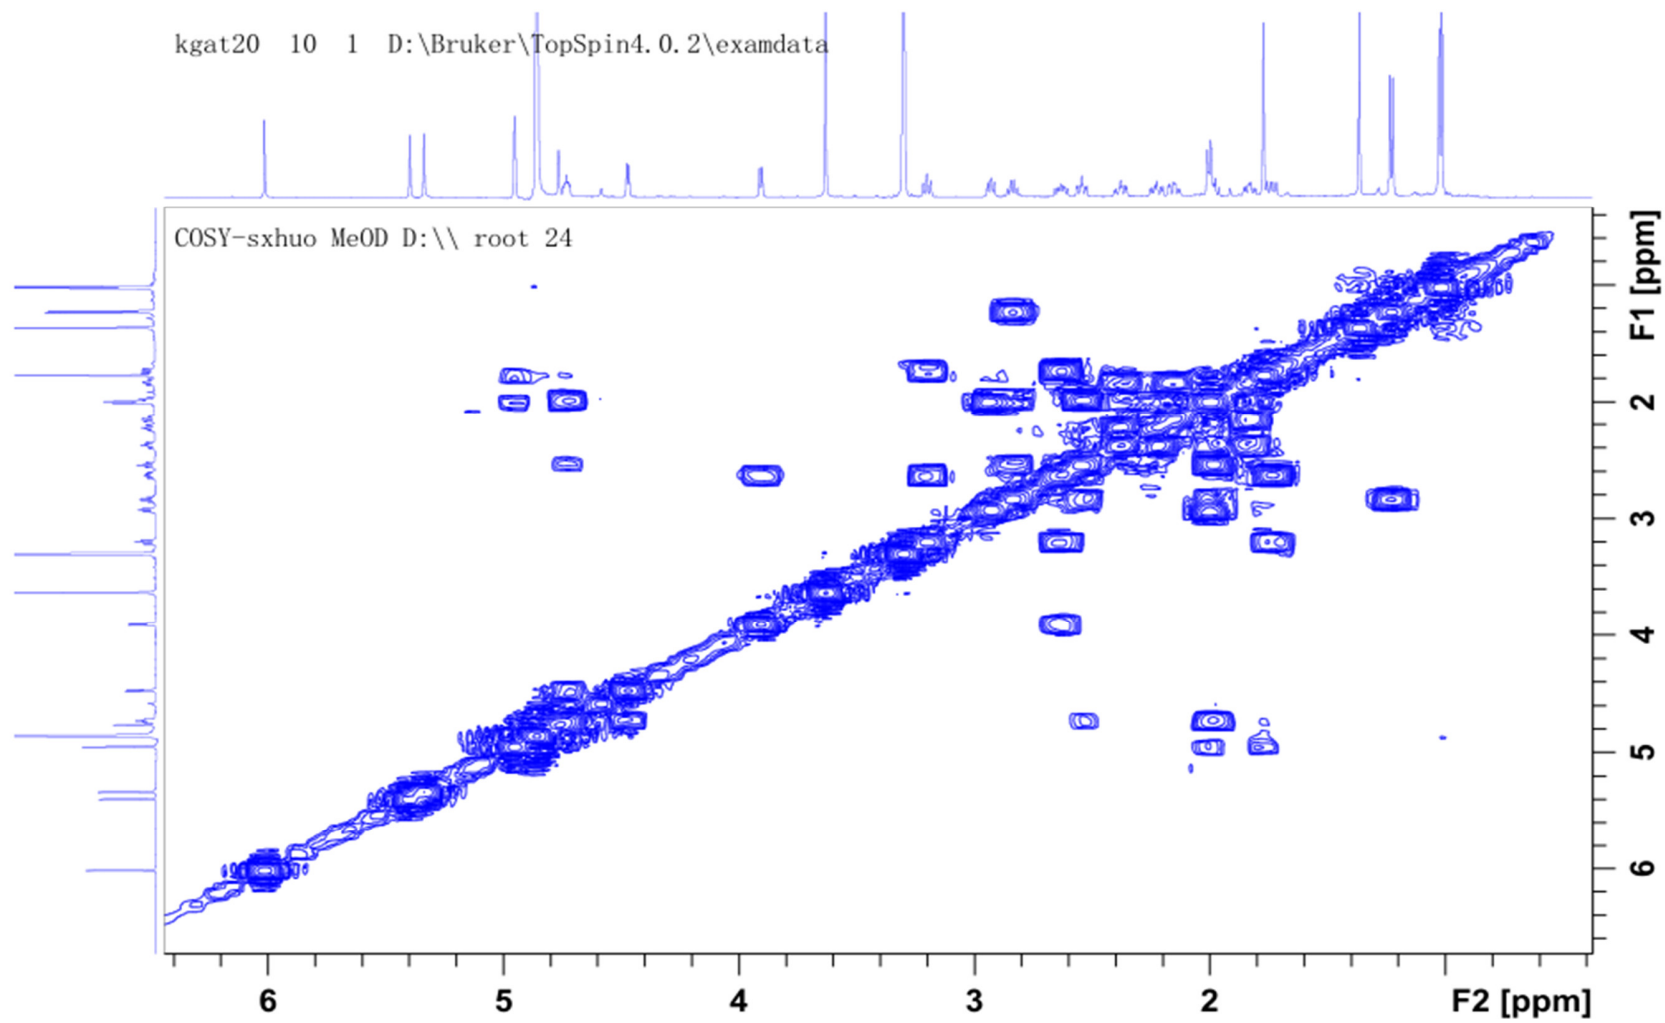

Figure S25. HSQC (600/150 MHz, MeOH-*d*<sub>4</sub>) spectrum of 4.

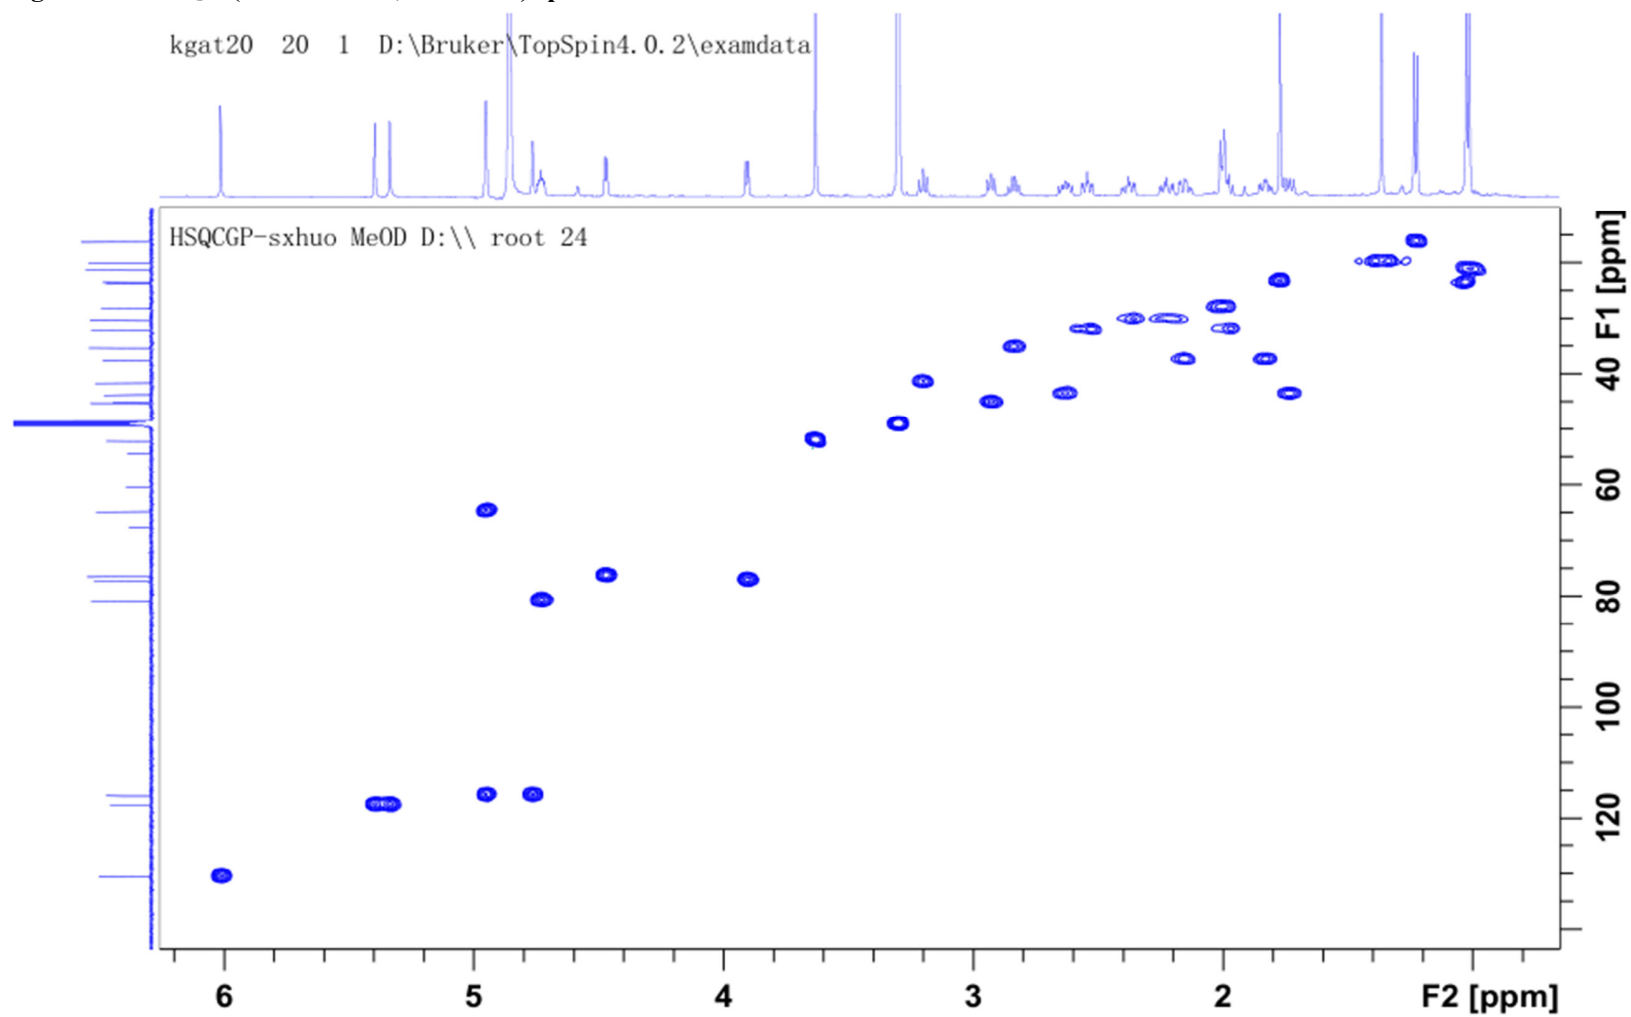

Figure S26. HMBC (600/150 MHz, MeOH-*d*<sub>4</sub>) spectrum of 4.

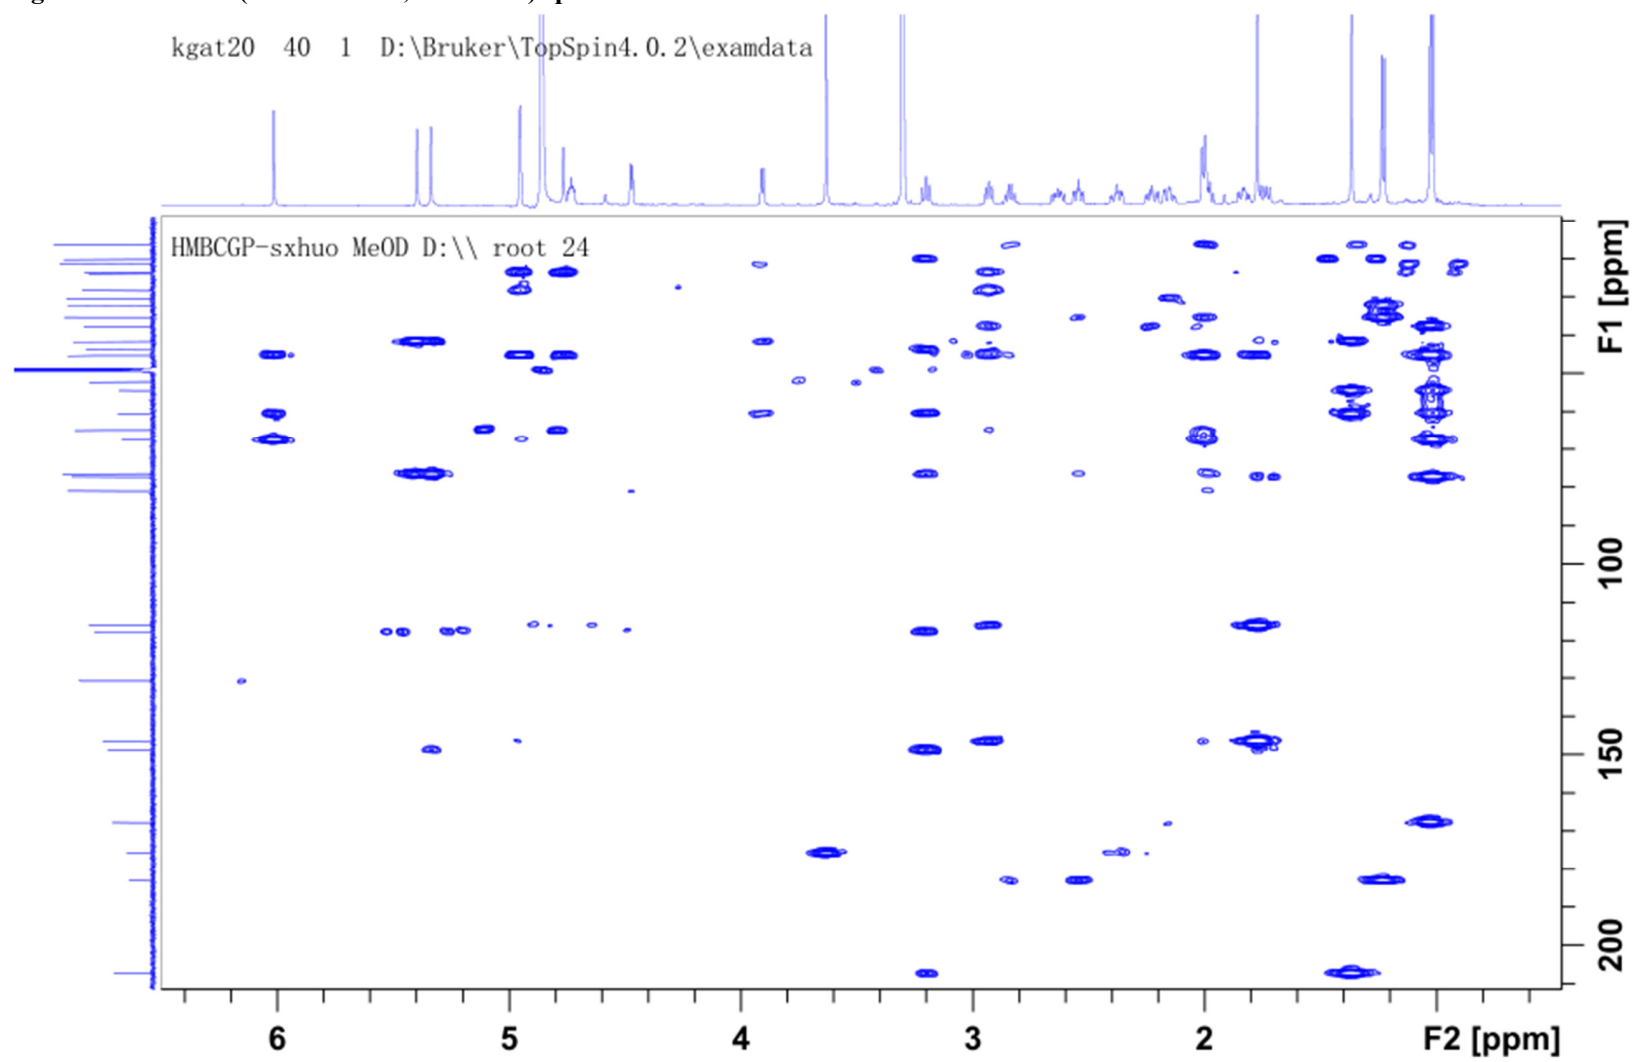

Figure S27. ROESY (600/150 MHz, MeOH-*d*<sub>4</sub>) spectrum of 4.

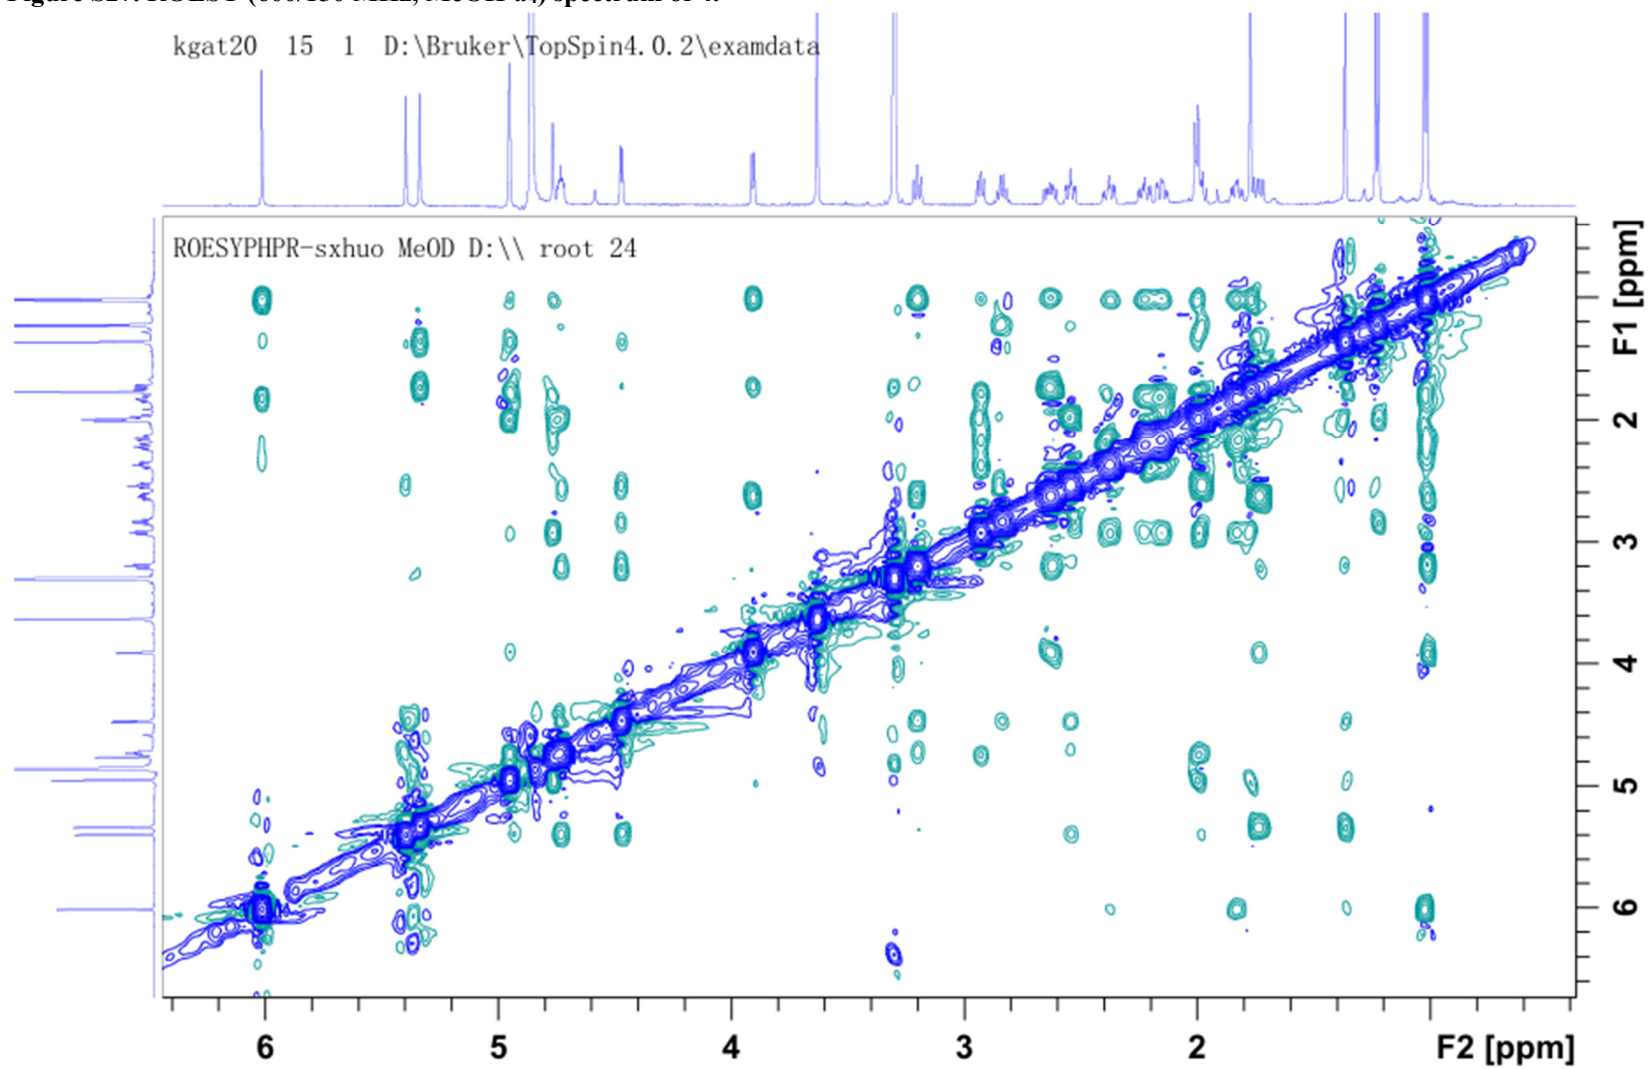



**Section S9: HRESIMS spectrum of 4**

**Figure S28. HRESIMS spectrum of 4.**

### Qualitative Analysis Report

|                               |                             |                      |                       |
|-------------------------------|-----------------------------|----------------------|-----------------------|
| <b>Data Filename</b>          | kgat18.d                    | <b>Sample Name</b>   | kgat18                |
| <b>Sample Type</b>            | Sample                      | <b>Position</b>      | P1-A7                 |
| <b>Instrument Name</b>        | Instrument 1                | <b>User Name</b>     |                       |
| <b>Acq Method</b>             | s.m                         | <b>Acquired Time</b> | 2/25/2021 11:44:06 AM |
| <b>IRM Calibration Status</b> | Success                     | <b>DA Method</b>     | Default.m             |
| <b>Comment</b>                |                             |                      |                       |
| <br>                          |                             |                      |                       |
| <b>Sample Group</b>           |                             | <b>Info.</b>         |                       |
| <b>Acquisition SW</b>         | 6200 series TOF/6500 series |                      |                       |
| <b>Version</b>                | Q-TOF B.05.01 (B5125.2)     |                      |                       |

#### User Spectra

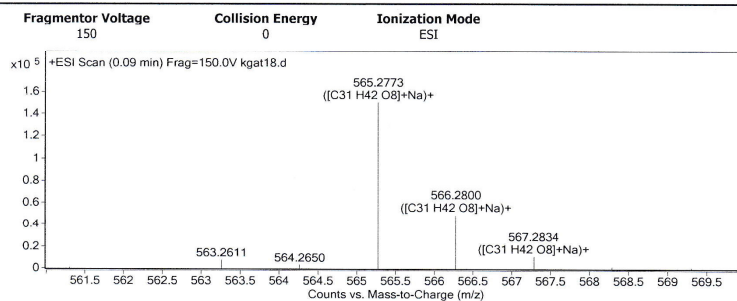

#### Peak List

| m/z       | z | Abund     | Formula    | Ion     |
|-----------|---|-----------|------------|---------|
| 102.1273  | 1 | 57547.51  |            |         |
| 146.0803  | 1 | 27420.7   |            |         |
| 172.0935  | 1 | 43954.79  |            |         |
| 535.3023  | 1 | 28773.45  |            |         |
| 543.2954  | 1 | 32063.38  |            |         |
| 565.2773  | 1 | 150467.63 | C31 H42 O8 | (M+Na)+ |
| 566.28    | 1 | 49360.54  | C31 H42 O8 | (M+Na)+ |
| 714.3826  | 1 | 25285.37  |            |         |
| 1107.565  | 1 | 43101.66  |            |         |
| 1108.5688 | 1 | 28253.28  |            |         |

#### Formula Calculator Element Limits

| Element | Min | Max |
|---------|-----|-----|
| C       | 3   | 60  |
| H       | 0   | 120 |
| O       | 0   | 30  |

#### Formula Calculator Results

| Formula    | CalculatedMass | CalculatedMz | Mz       | Diff. (mDa) | Diff. (ppm) | DBE     |
|------------|----------------|--------------|----------|-------------|-------------|---------|
| C31 H42 O8 | 542.2880       | 565.2772     | 565.2773 | -0.10       | -0.18       | 11.0000 |

--- End Of Report ---

**Section S10: Comparison of  $^1\text{H}$  NMR and  $^1\text{H}$ - $^1\text{H}$  COSY spectra between 4r and 4s**

**Figure S29. Comparison of  $^1\text{H}$  NMR spectra (600 MHz, pyridine- $d_5$ ) between 4r and 4s.**

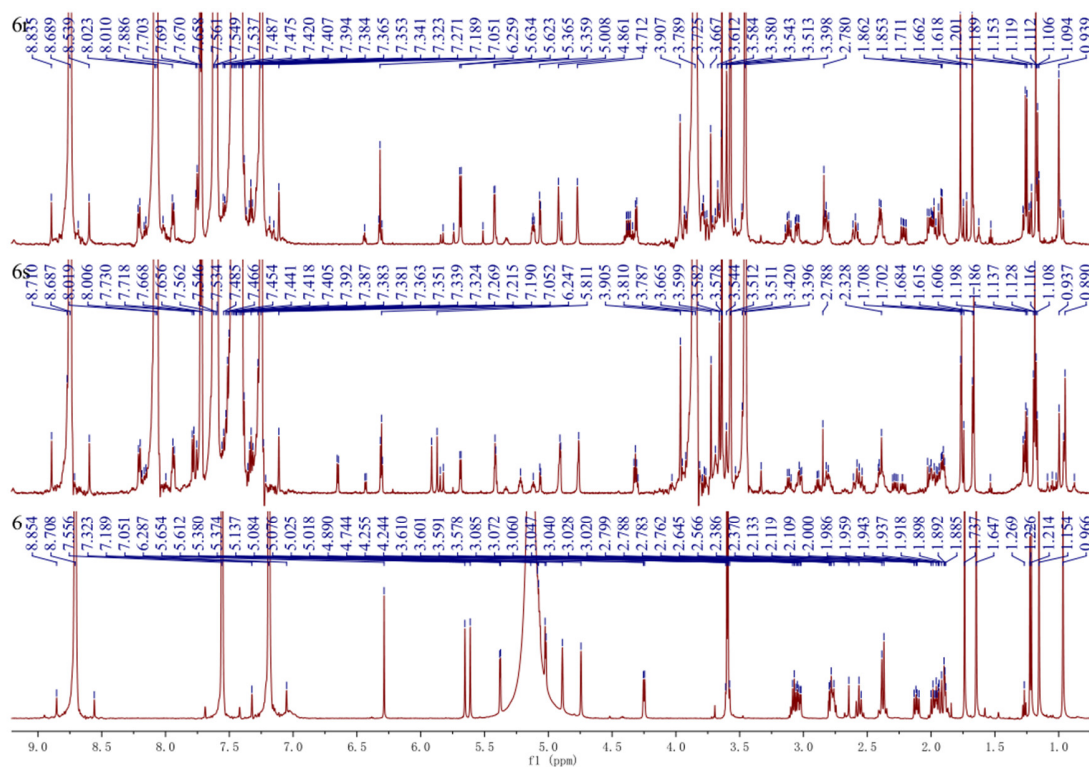

**Figure S30.** The  $^1\text{H}$ - $^1\text{H}$  COSY spectrum (600 MHz, pyridine- $d_5$ ) of 4r.

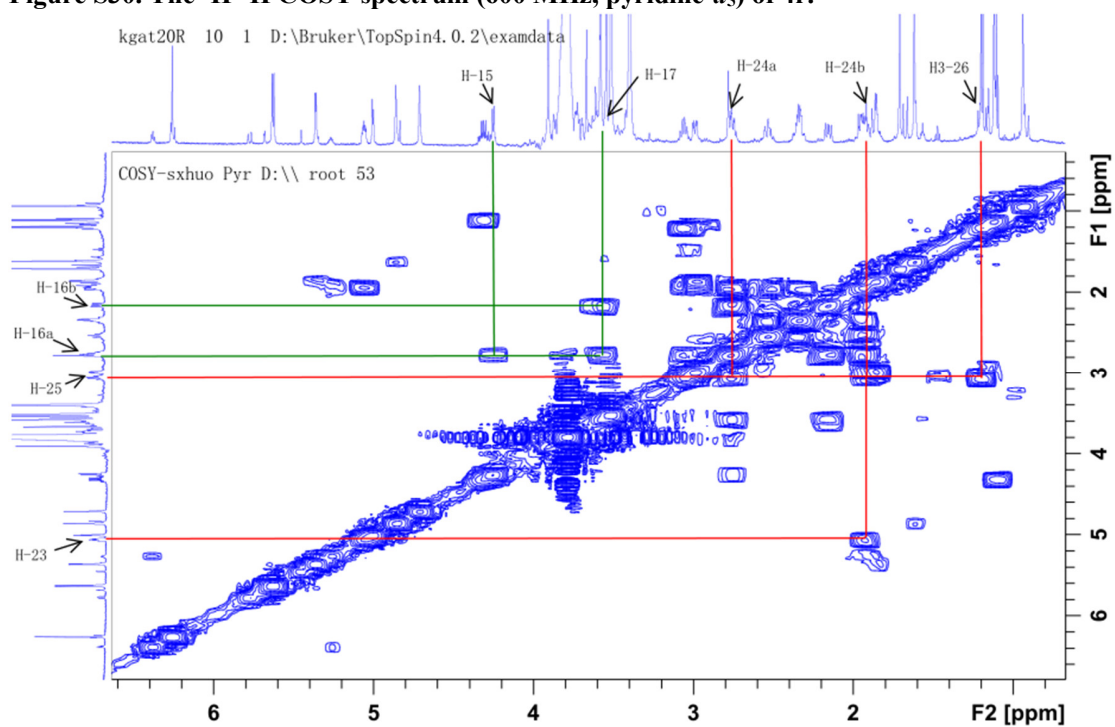

**Figure S31.** The  $^1\text{H}$ - $^1\text{H}$  COSY spectrum (600 MHz, pyridine- $d_5$ ) of 4r.

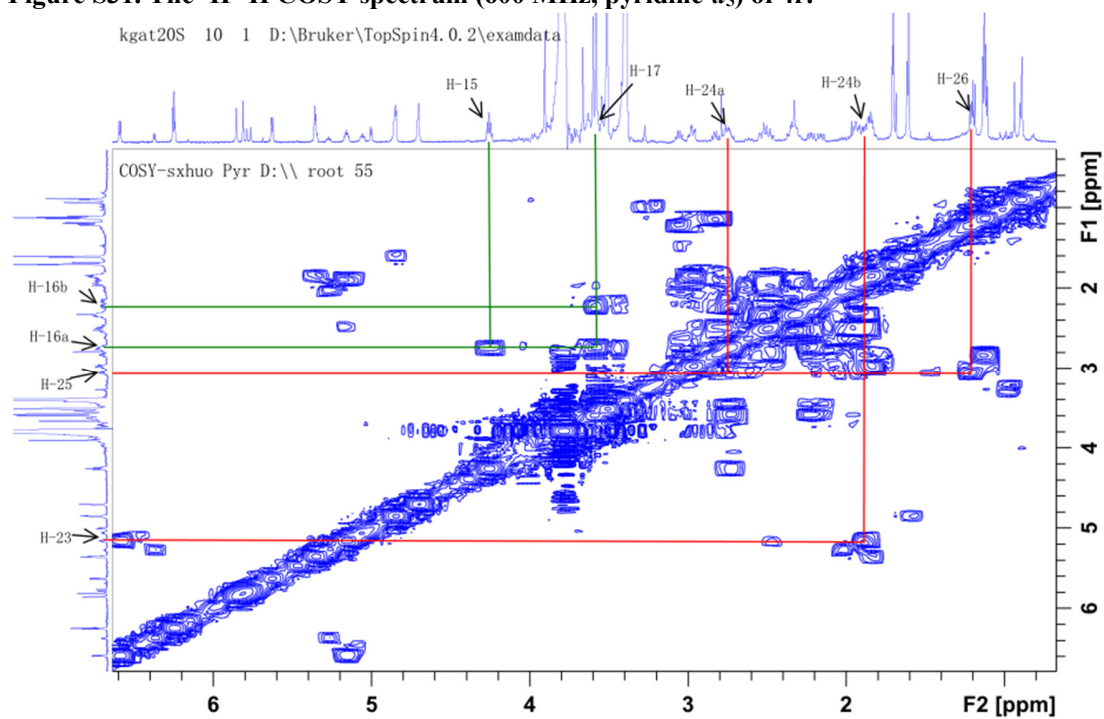

# Section S11: 1D and 2D NMR spectra of compound 5

Figure S32.  $^1\text{H}$  NMR (600 MHz,  $\text{MeOH-}d_4$ ) spectrum of 5.

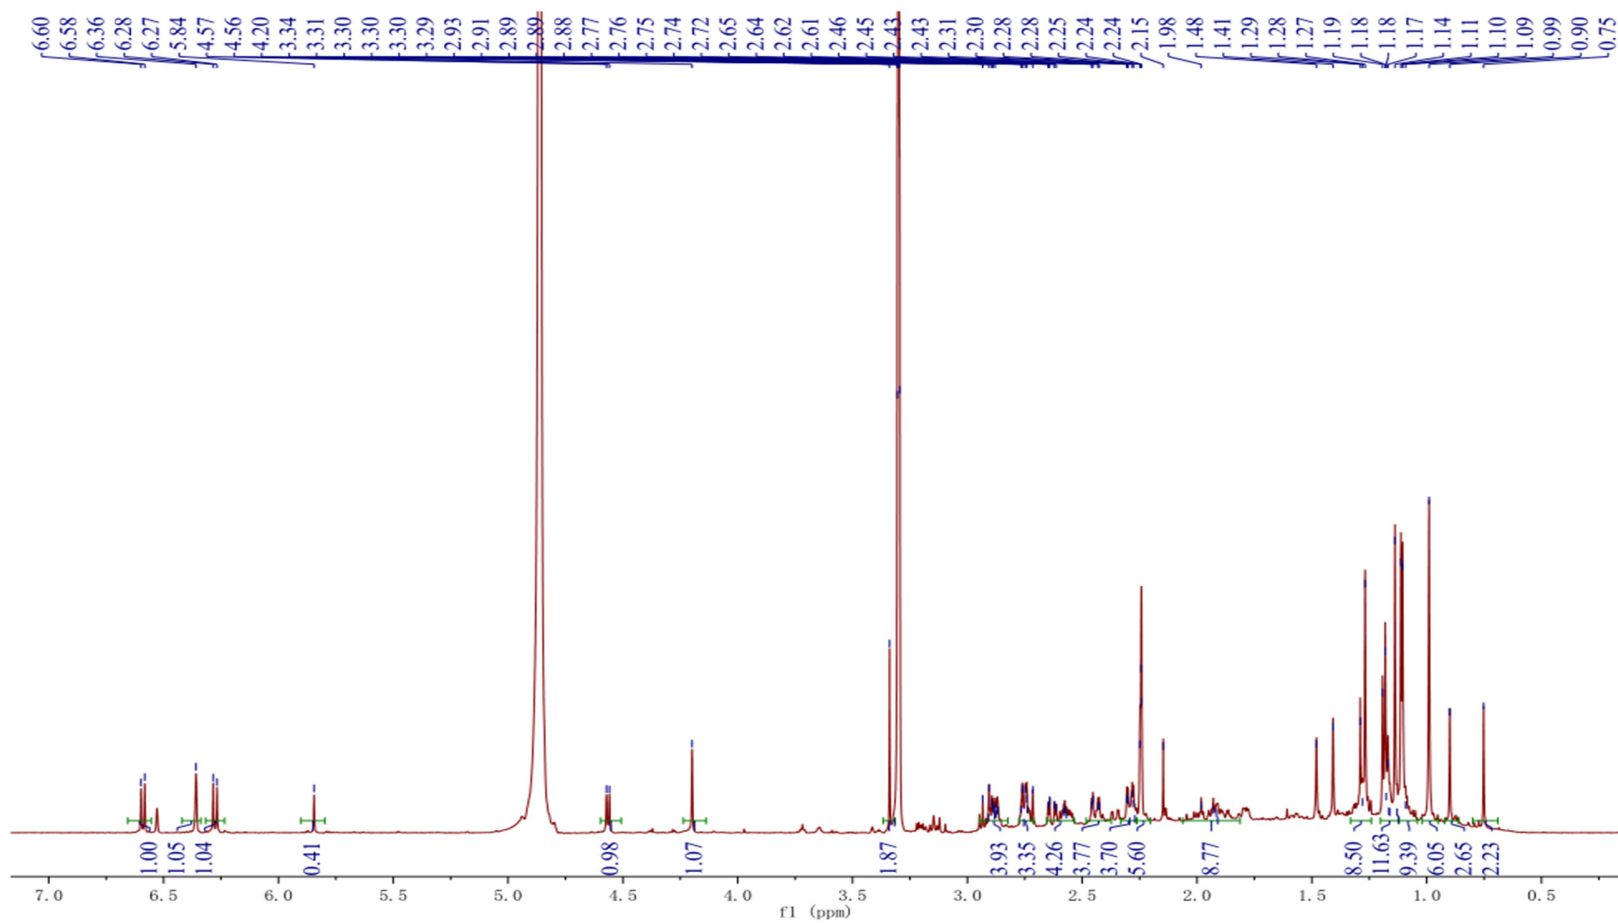

Figure S33.  $^{13}\text{C}$  NMR (150 MHz,  $\text{MeOH-}d_4$ ) spectrum of 5.

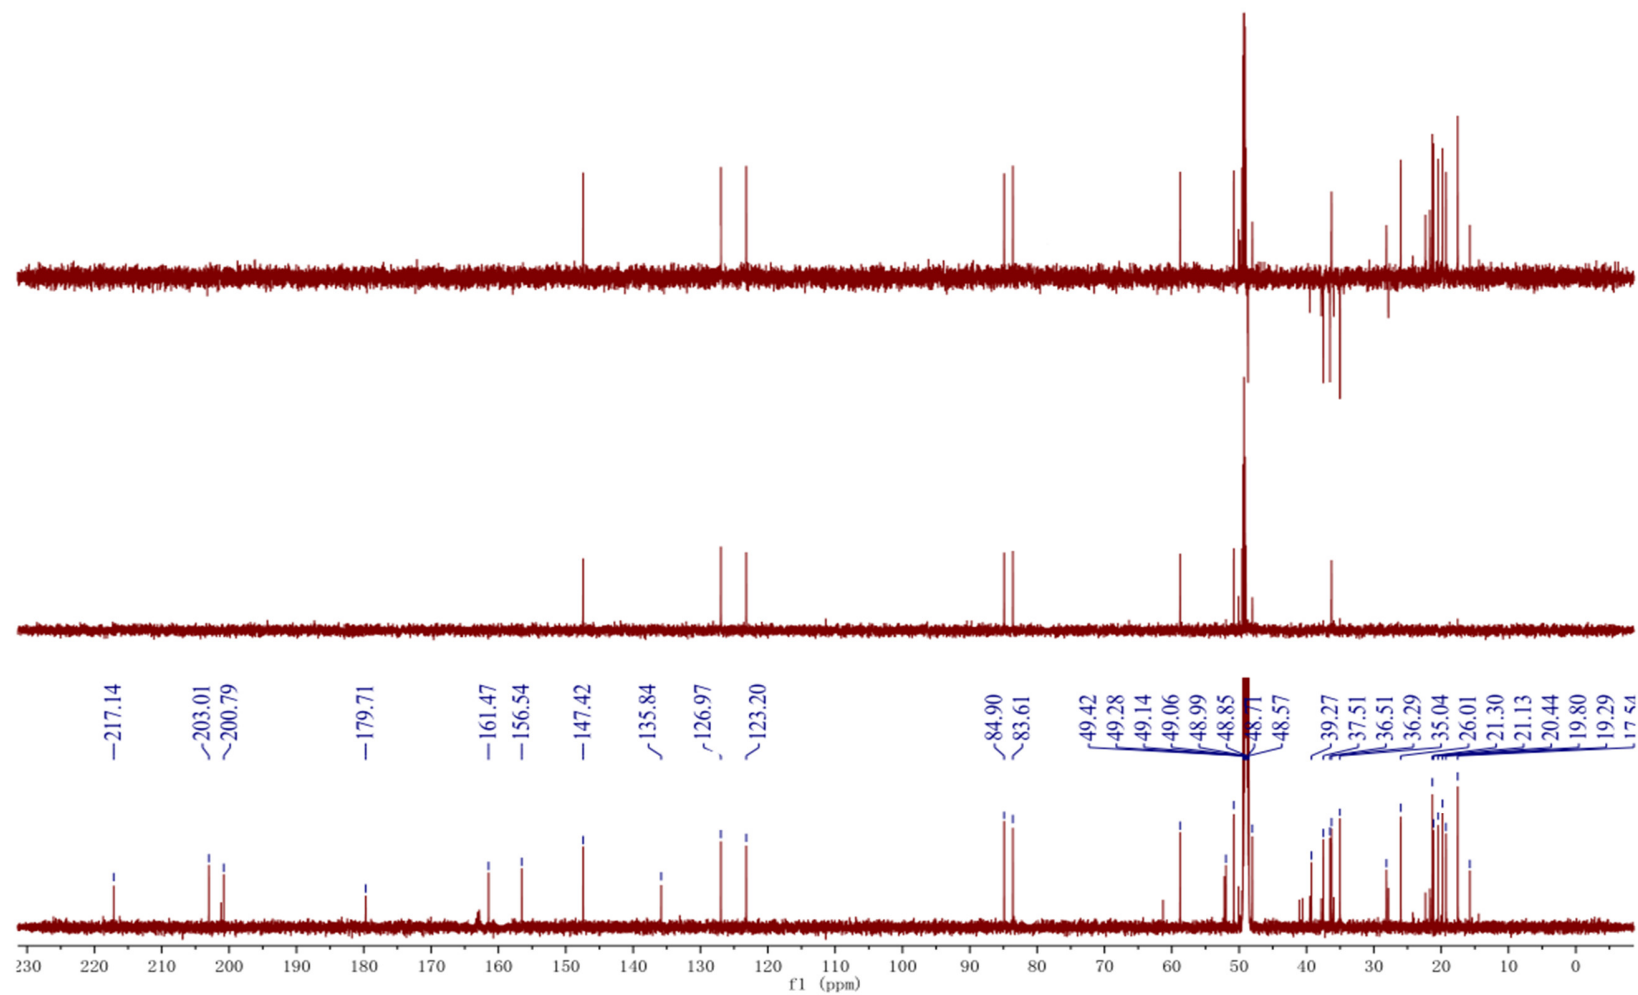

Figure S34.  $^1\text{H}$ - $^1\text{H}$  COSY (600 MHz,  $\text{MeOH-}d_4$ ) spectrum of 5.

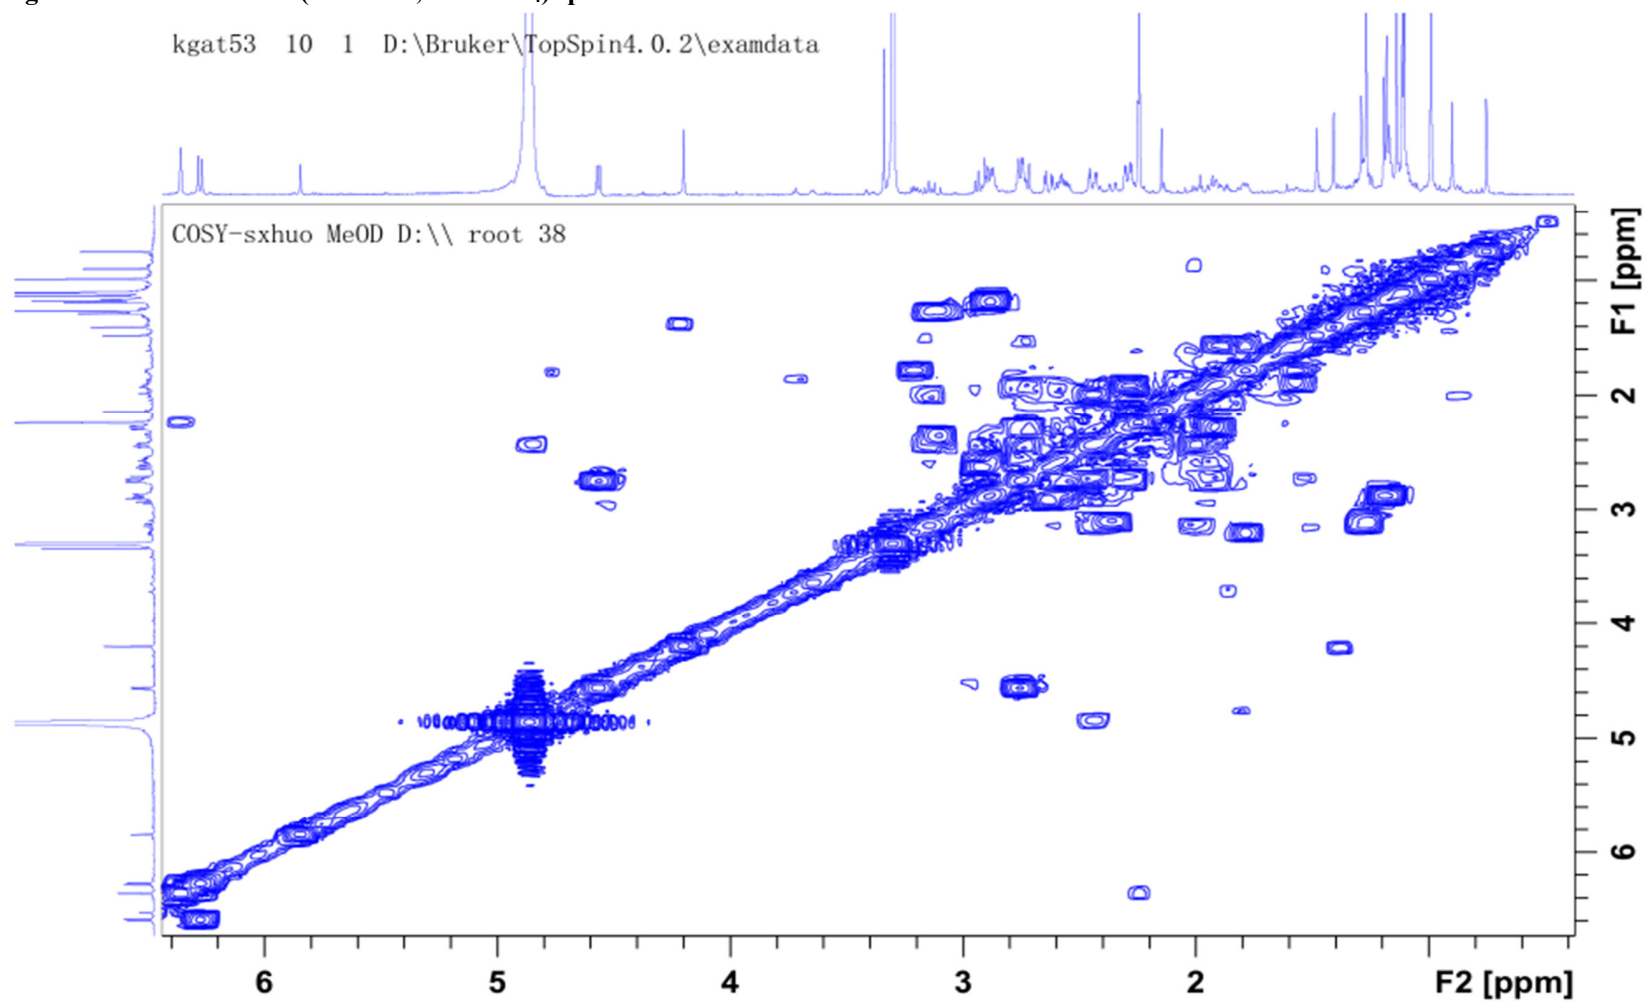

Figure S35. HSQC (600/150 MHz, MeOH-*d*<sub>4</sub>) spectrum of 5.

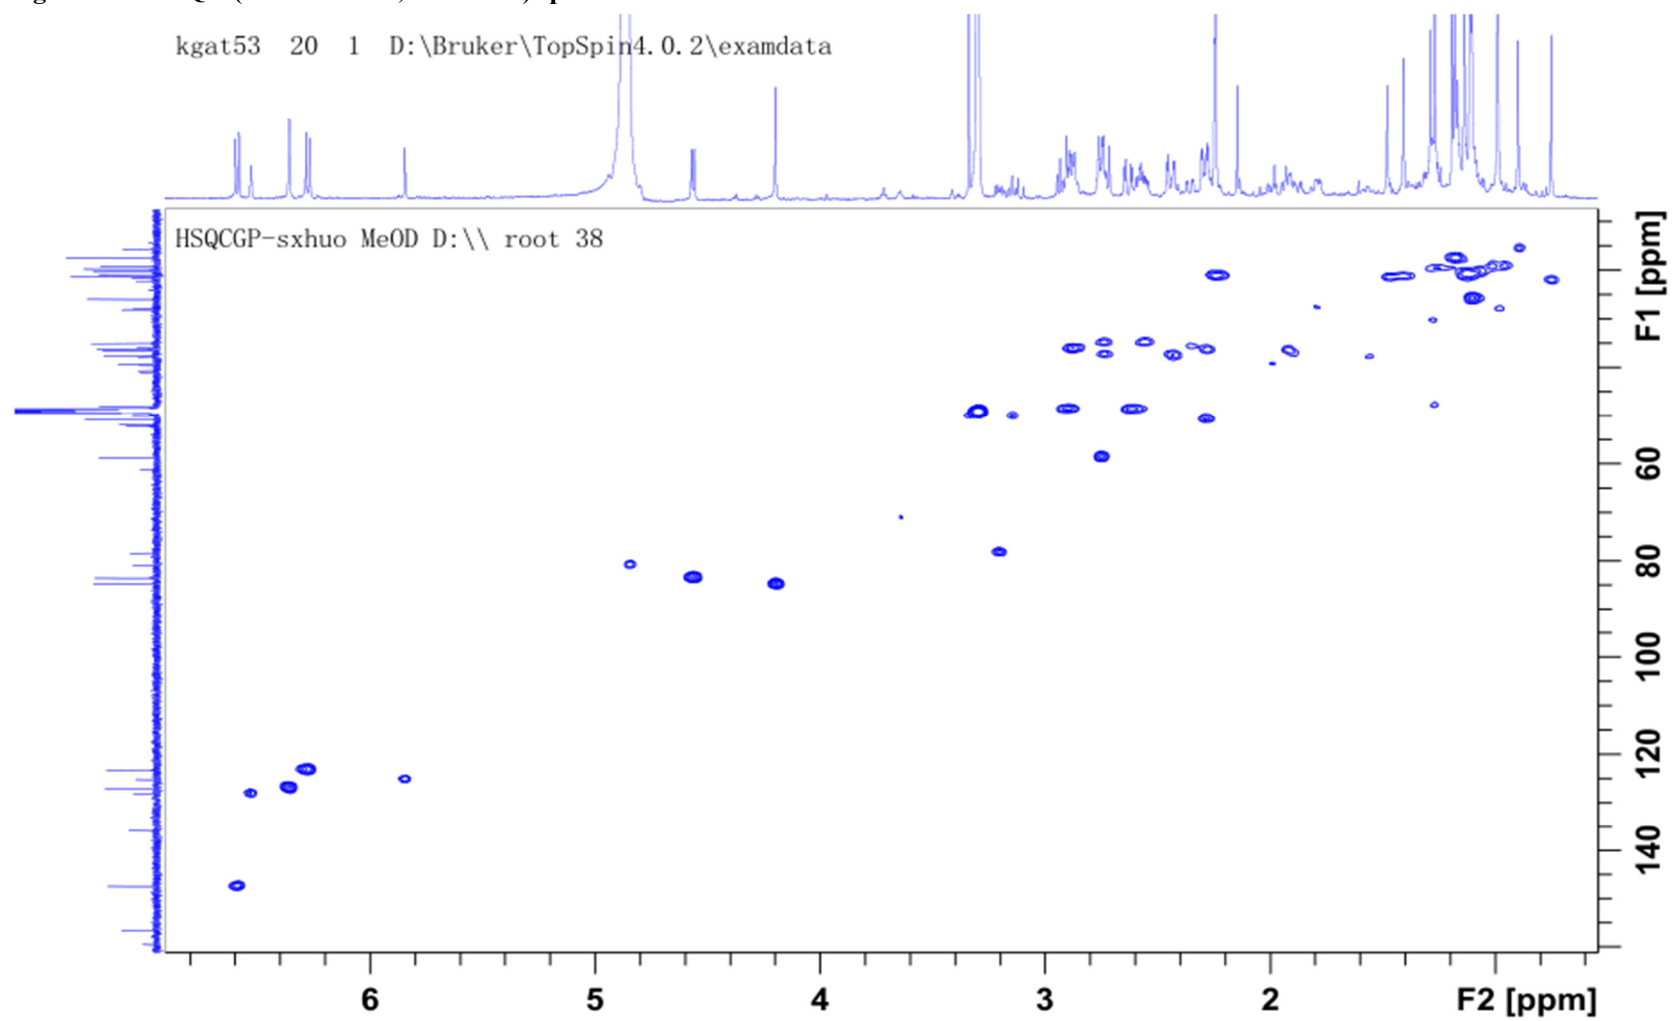



Figure S36. HMBC (600/150 MHz, MeOH-*d*<sub>4</sub>) spectrum of 5.

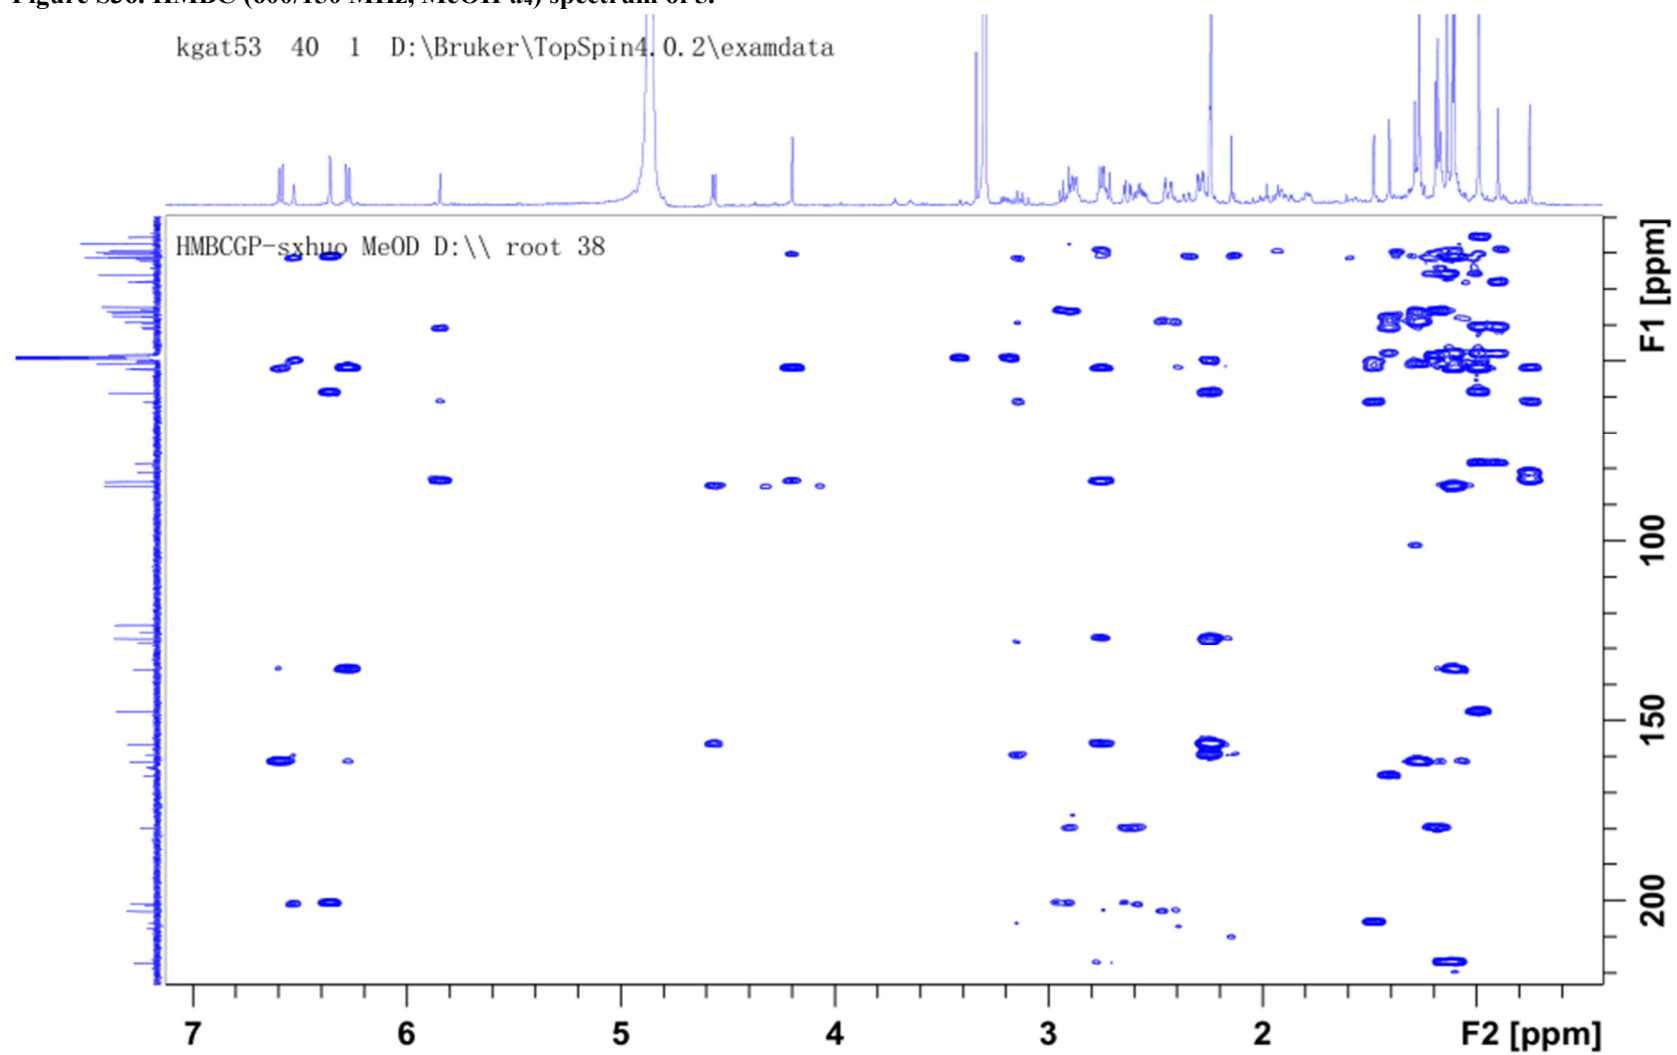

Figure S37. ROESY (600/150 MHz, MeOH-*d*<sub>4</sub>) spectrum of 5.

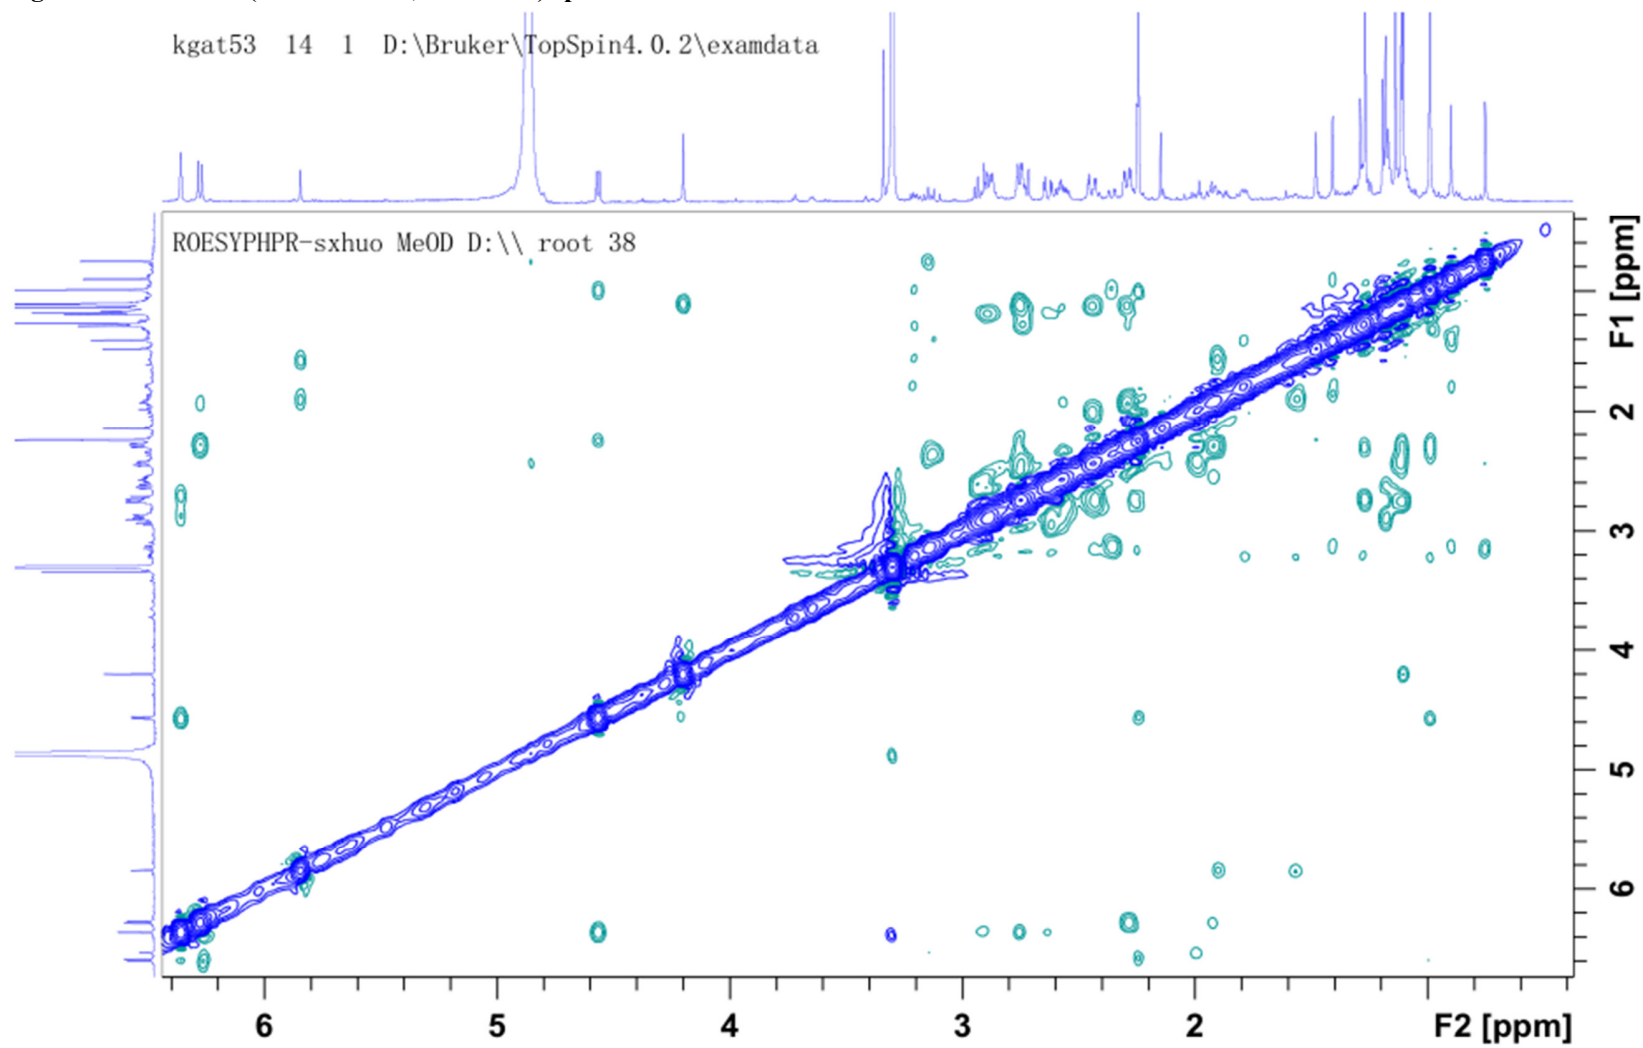

## Section S12: HRESIMS spectrum of 5

Figure S38. HRESIMS spectrum of 5.

### Qualitative Analysis Report

|                               |              |                      |                     |
|-------------------------------|--------------|----------------------|---------------------|
| <b>Data Filename</b>          | kgat53.d     | <b>Sample Name</b>   | kgat53              |
| <b>Sample Type</b>            | Sample       | <b>Position</b>      | P1-A2               |
| <b>Instrument Name</b>        | Instrument 1 | <b>User Name</b>     |                     |
| <b>Acq Method</b>             | s-.m         | <b>Acquired Time</b> | 7/9/2021 2:52:30 PM |
| <b>IRM Calibration Status</b> | Success      | <b>DA Method</b>     | Default.m           |
| <b>Comment</b>                |              |                      |                     |

  

|                       |                             |              |
|-----------------------|-----------------------------|--------------|
| <b>Sample Group</b>   |                             | <b>Info.</b> |
| <b>Acquisition SW</b> | 6200 series TOF/6500 series |              |
| <b>Version</b>        | Q-TOF B.05.01 (B5125.2)     |              |

### User Spectra

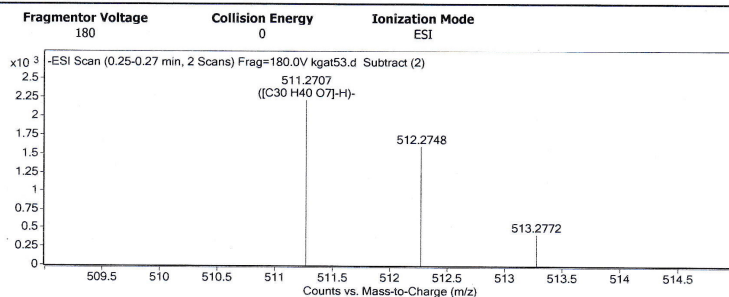

### Peak List

| m/z      | z | Abund   | Formula    | Ion    |
|----------|---|---------|------------|--------|
| 113.9895 |   | 422.89  |            |        |
| 511.2707 |   | 2213.88 | C30 H40 O7 | (M-H)- |
| 512.2748 | 1 | 1590.76 |            |        |
| 513.2772 | 1 | 409.76  |            |        |
| 515.3022 |   | 448.46  |            |        |
| 525.2506 |   | 447.94  |            |        |
| 527.2635 | 1 | 789.87  |            |        |
| 529.281  |   | 2487.08 |            |        |
| 530.2848 | 1 | 1967.59 |            |        |
| 551.2611 |   | 398.79  |            |        |
| 579.2579 | 1 | 496.07  |            |        |
| 643.2744 | 1 | 433.25  |            |        |

### Formula Calculator Element Limits

| Element | Min | Max |
|---------|-----|-----|
| C       | 3   | 60  |
| H       | 0   | 120 |
| O       | 0   | 30  |

### Formula Calculator Results

| Formula    | CalculatedMass | CalculatedMz | Mz       | Diff. (mDa) | Diff. (ppm) | DBE     |
|------------|----------------|--------------|----------|-------------|-------------|---------|
| C30 H40 O7 | 512.2774       | 511.2701     | 511.2707 | -0.60       | -1.17       | 11.0000 |

--- End Of Report ---

# Section S13: 1D and 2D NMR spectra of compound 6

Figure S39. <sup>1</sup>H NMR (600 MHz, MeOH-*d*<sub>4</sub>) spectrum of 6.

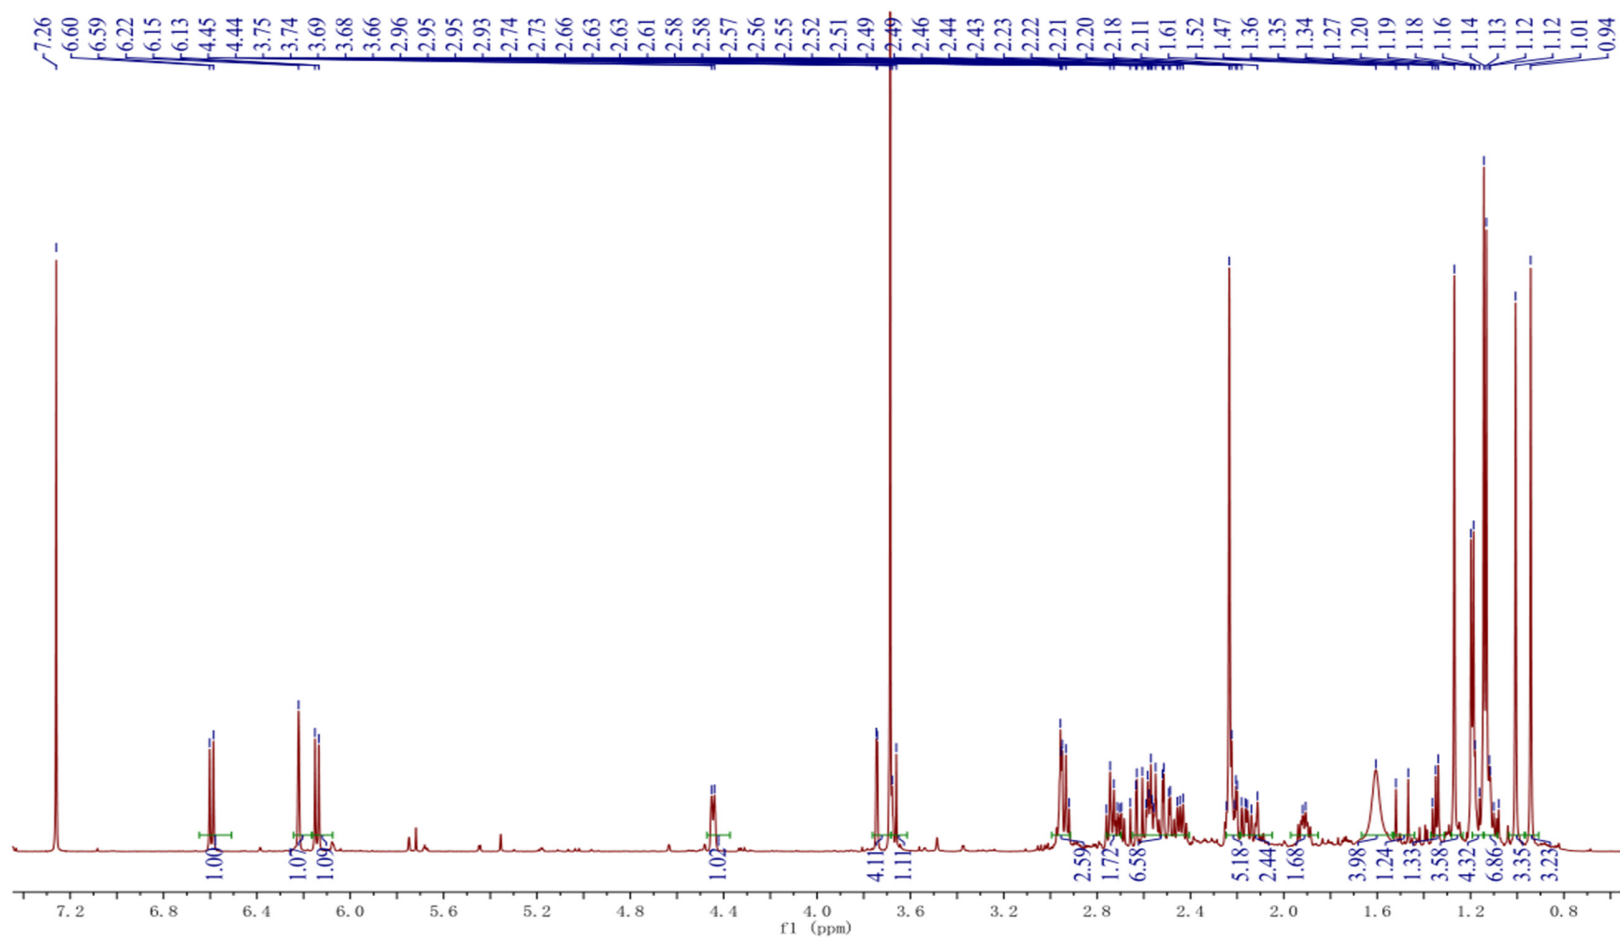

Figure S40.  $^{13}\text{C}$  NMR (150 MHz,  $\text{MeOH-}d_4$ ) spectrum of 6.

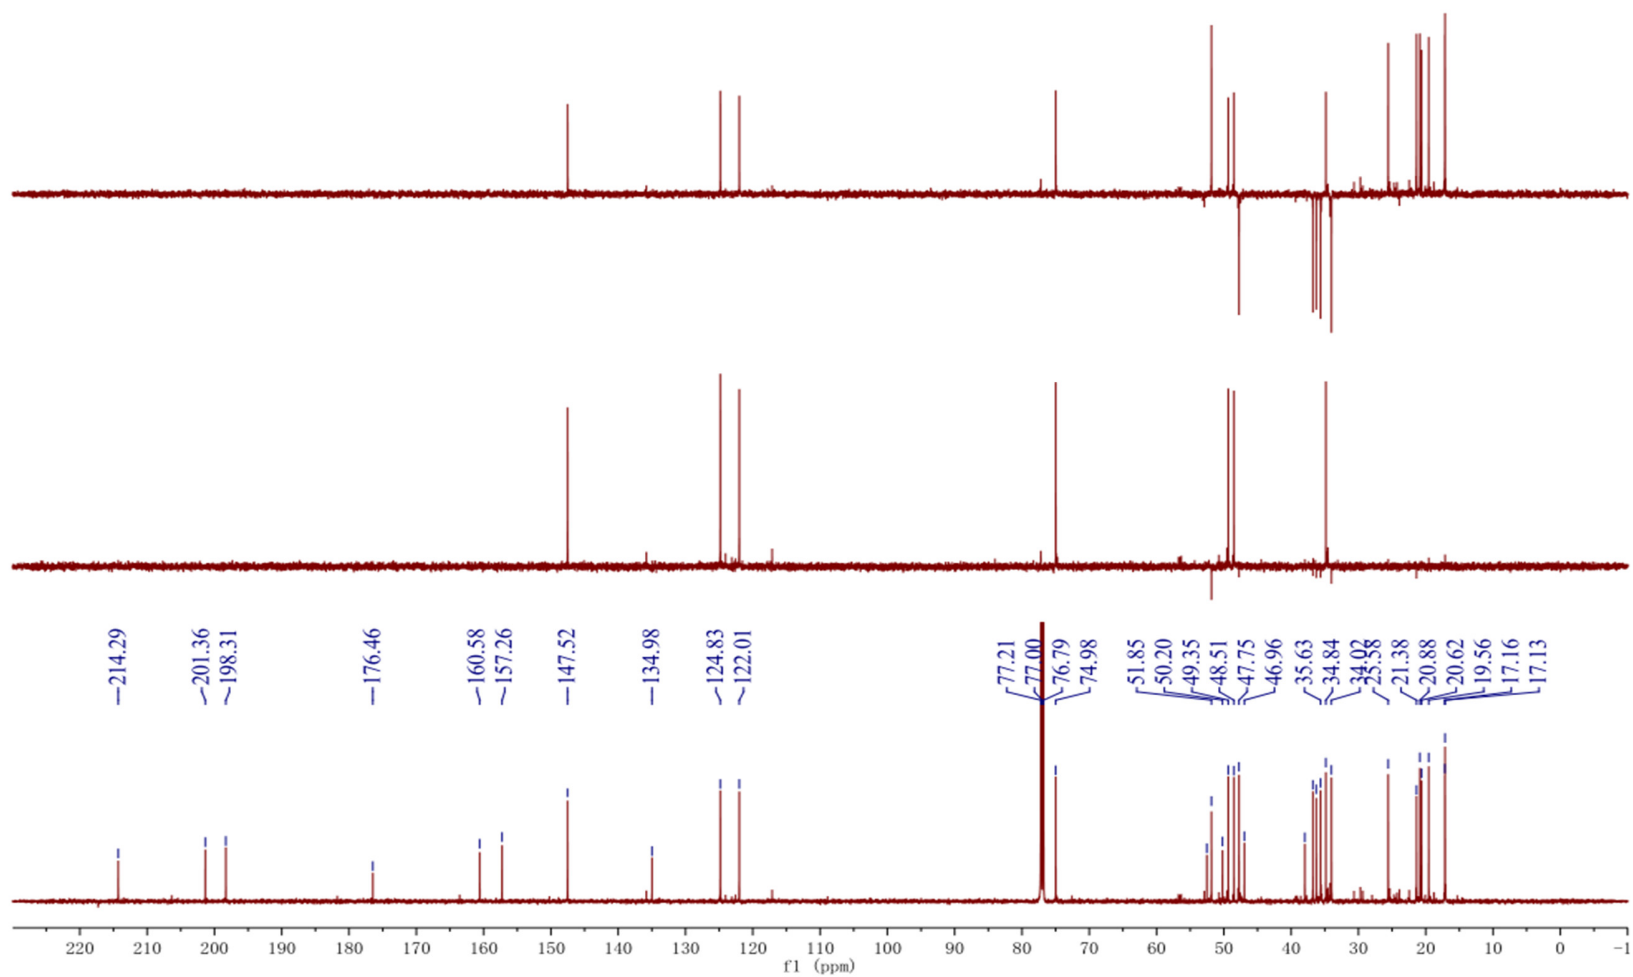

Figure S41.  $^1\text{H}$ - $^1\text{H}$  COSY (600 MHz,  $\text{MeOH-}d_4$ ) spectrum of 6.

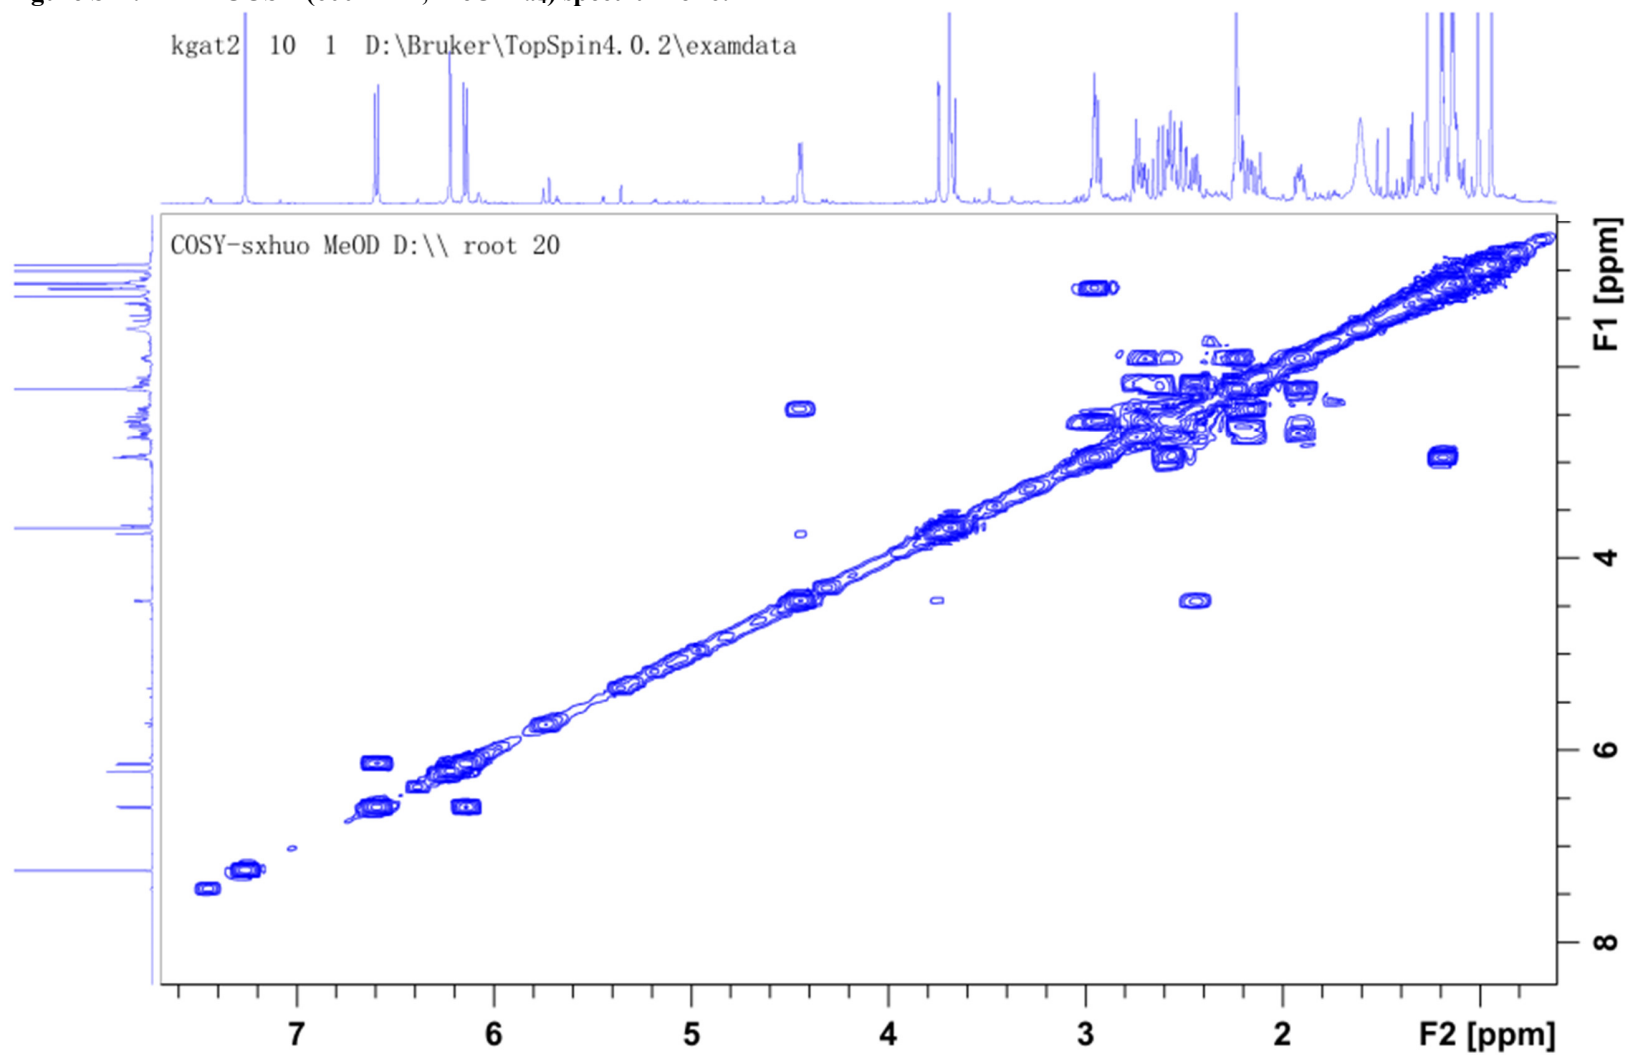

Figure S42. HSQC (600/150 MHz, MeOH-*d*<sub>4</sub>) spectrum of 6.

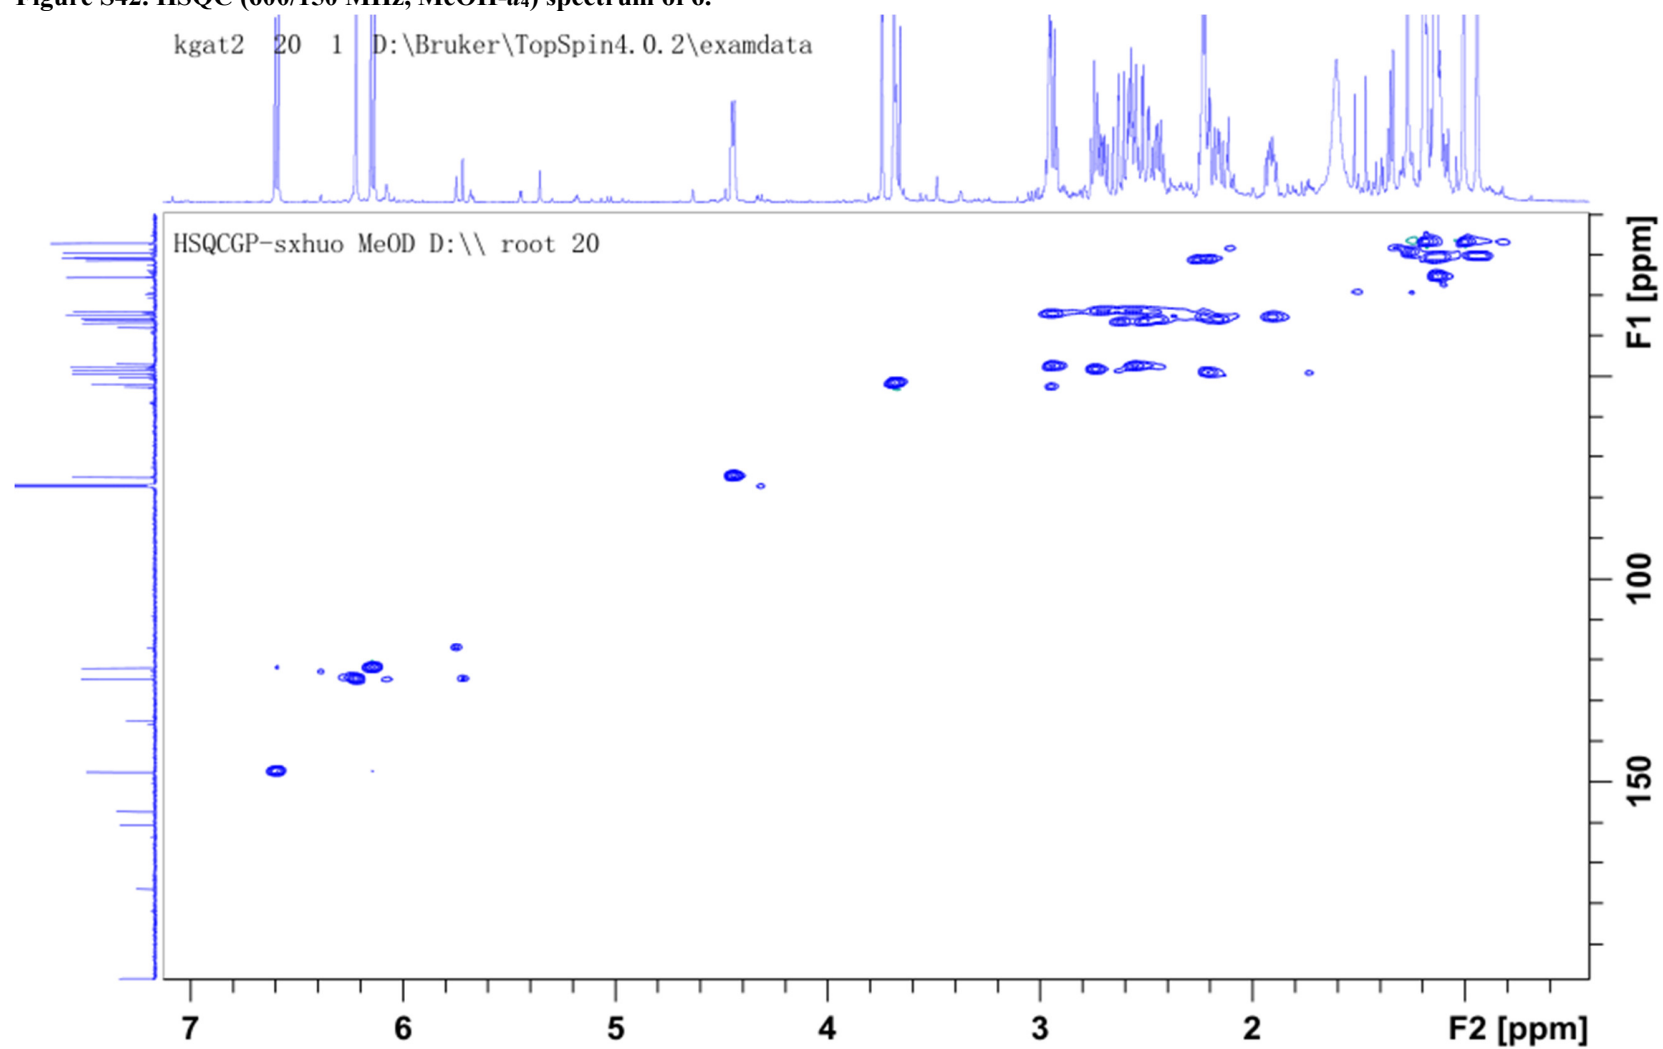

Figure S43. HMBC (600/150 MHz, MeOH-*d*<sub>4</sub>) spectrum of 6.

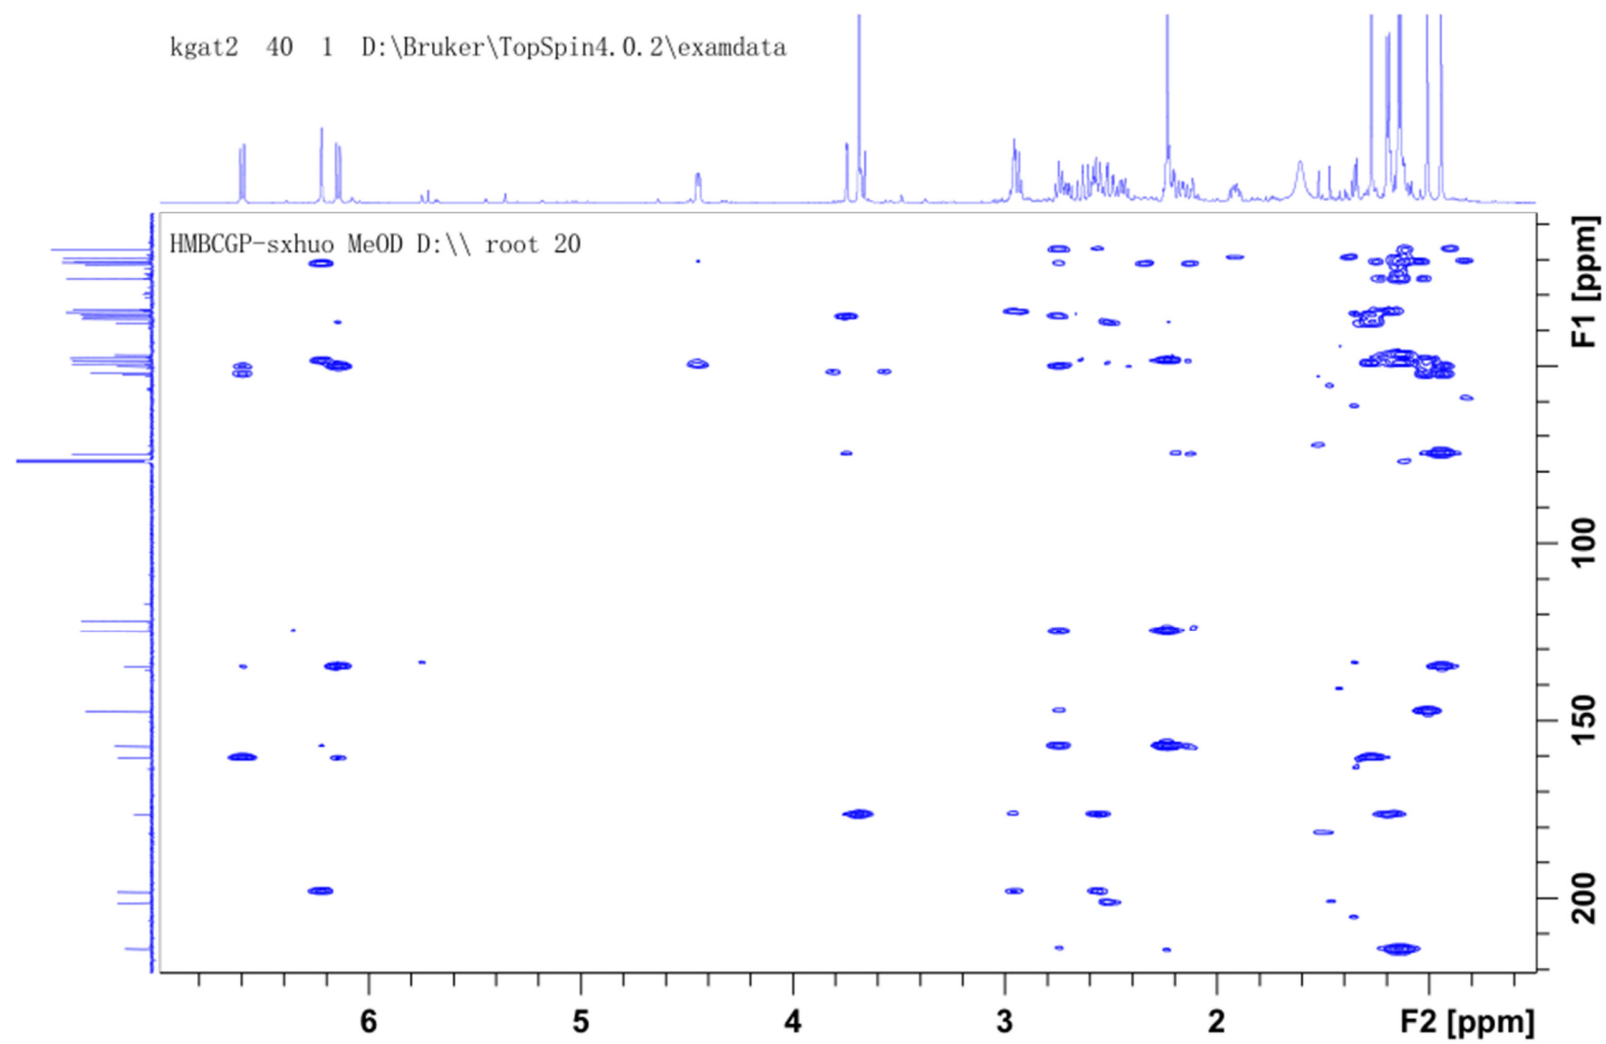



Figure S44. ROESY (600/150 MHz, MeOH-*d*<sub>4</sub>) spectrum of 6.

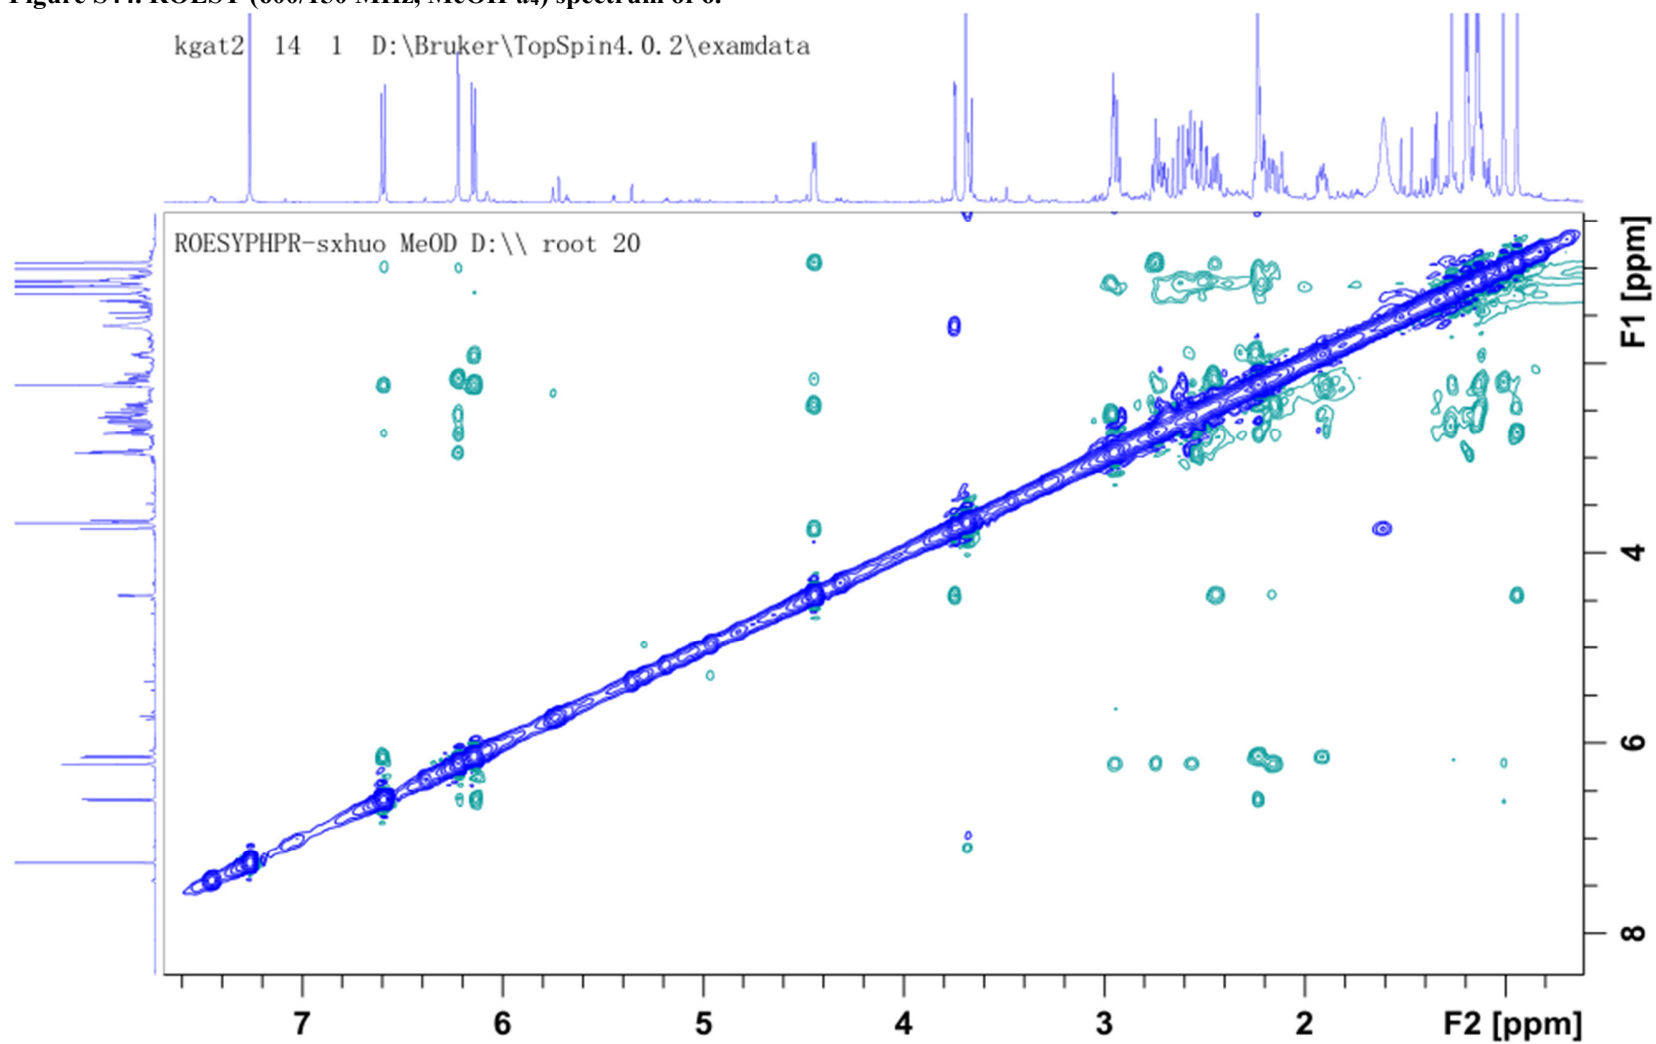

## Section S14: HRESIMS spectrum of 6

Figure S45. HRESIMS spectrum of 6.

### Qualitative Analysis Report

|                               |              |                      |                       |
|-------------------------------|--------------|----------------------|-----------------------|
| <b>Data Filename</b>          | kgat2.d      | <b>Sample Name</b>   | kgat2                 |
| <b>Sample Type</b>            | Sample       | <b>Position</b>      | P1-A3                 |
| <b>Instrument Name</b>        | Instrument 1 | <b>User Name</b>     |                       |
| <b>Acq Method</b>             | s.m          | <b>Acquired Time</b> | 2/25/2021 11:39:22 AM |
| <b>IRM Calibration Status</b> | Success      | <b>DA Method</b>     | Default.m             |
| <b>Comment</b>                |              |                      |                       |

  

|                       |                             |              |
|-----------------------|-----------------------------|--------------|
| <b>Sample Group</b>   |                             | <b>Info.</b> |
| <b>Acquisition SW</b> | 6200 series TOF/6500 series |              |
| <b>Version</b>        | Q-TOF B.05.01 (B5125.2)     |              |

### User Spectra

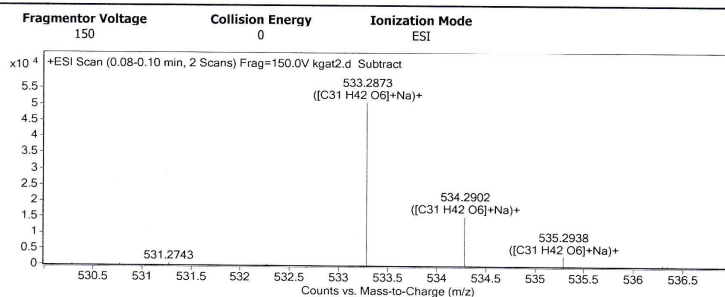

### Peak List

| m/z       | z | Abund    | Formula    | Ion     |
|-----------|---|----------|------------|---------|
| 102.1274  | 1 | 37320.11 |            |         |
| 511.3058  | 1 | 14331.96 |            |         |
| 533.2873  | 1 | 50725.95 | C31 H42 O6 | (M+Na)+ |
| 534.2902  | 1 | 15496.51 | C31 H42 O6 | (M+Na)+ |
| 547.2663  | 1 | 16946.77 |            |         |
| 549.27    | 1 | 16798.7  |            |         |
| 1043.5859 | 1 | 26370.52 |            |         |
| 1044.5892 | 1 | 16678.78 |            |         |
| 1057.5643 | 1 | 10931.84 |            |         |
| 1059.5744 | 1 | 7625.36  |            |         |

### Formula Calculator Element Limits

| Element | Min | Max |
|---------|-----|-----|
| C       | 3   | 60  |
| H       | 0   | 120 |
| O       | 0   | 30  |

### Formula Calculator Results

| Formula    | CalculatedMass | CalculatedMz | Mz       | Diff. (mDa) | Diff. (ppm) | DBE     |
|------------|----------------|--------------|----------|-------------|-------------|---------|
| C31 H42 O6 | 510.2981       | 533.2874     | 533.2873 | 0.10        | 0.19        | 11.0000 |

--- End Of Report ---

# Section S15: 1D and 2D NMR spectra of compound 7

Figure S46. <sup>1</sup>H NMR (600 MHz, MeOH-*d*<sub>4</sub>) spectrum of 7.

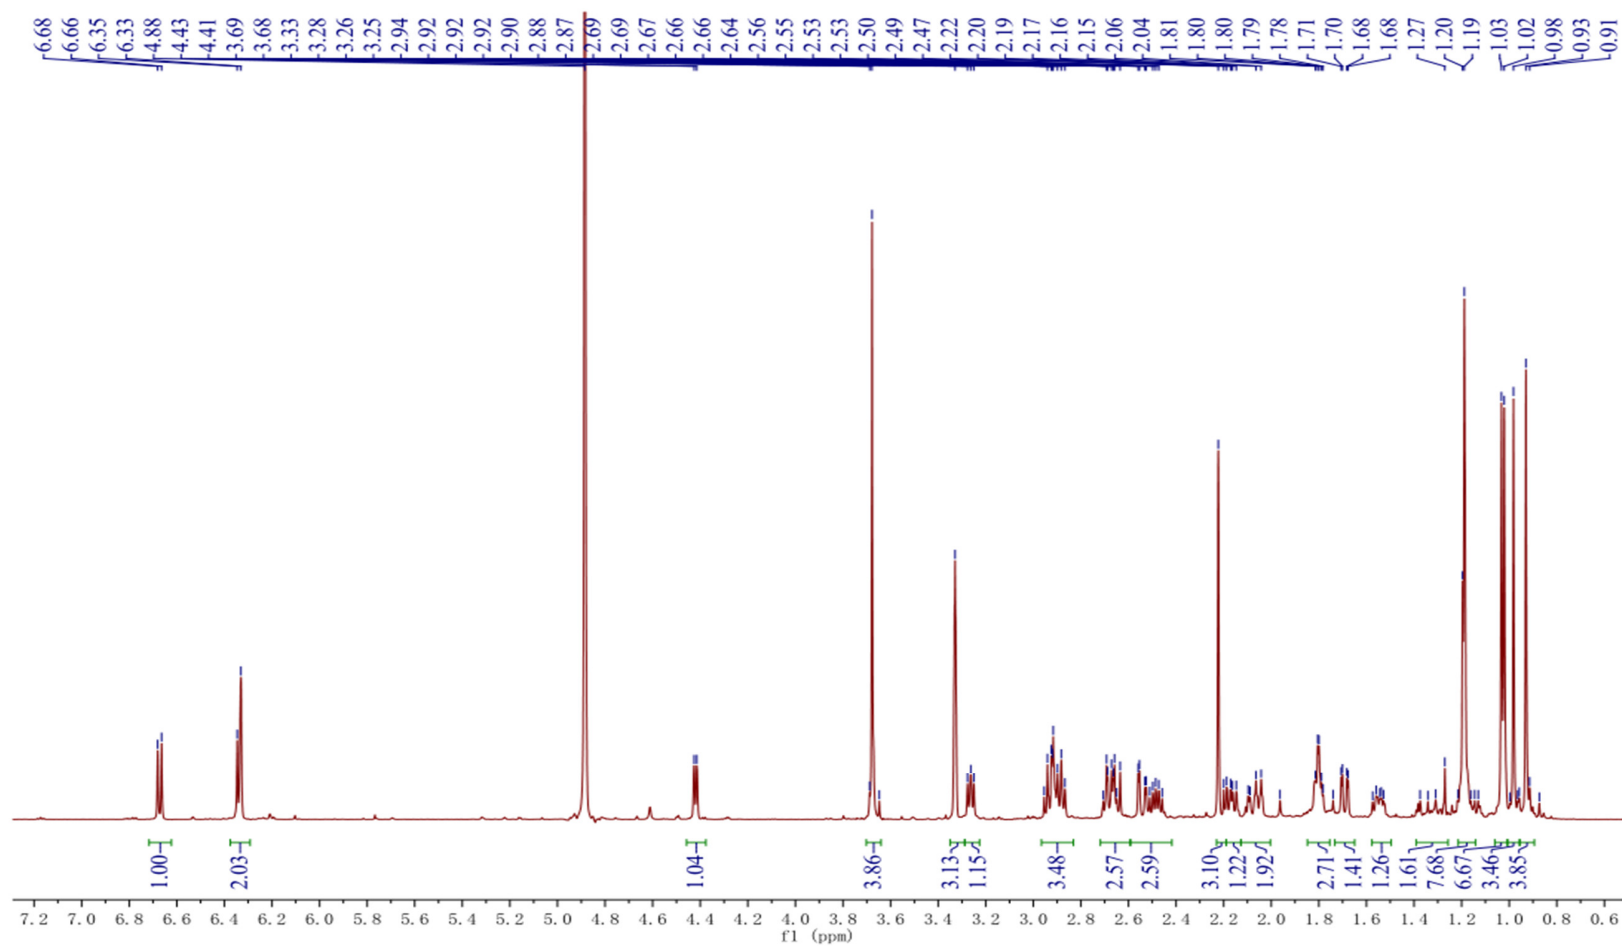

Figure S47.  $^{13}\text{C}$  NMR (150 MHz,  $\text{MeOH-}d_4$ ) spectrum of 7.

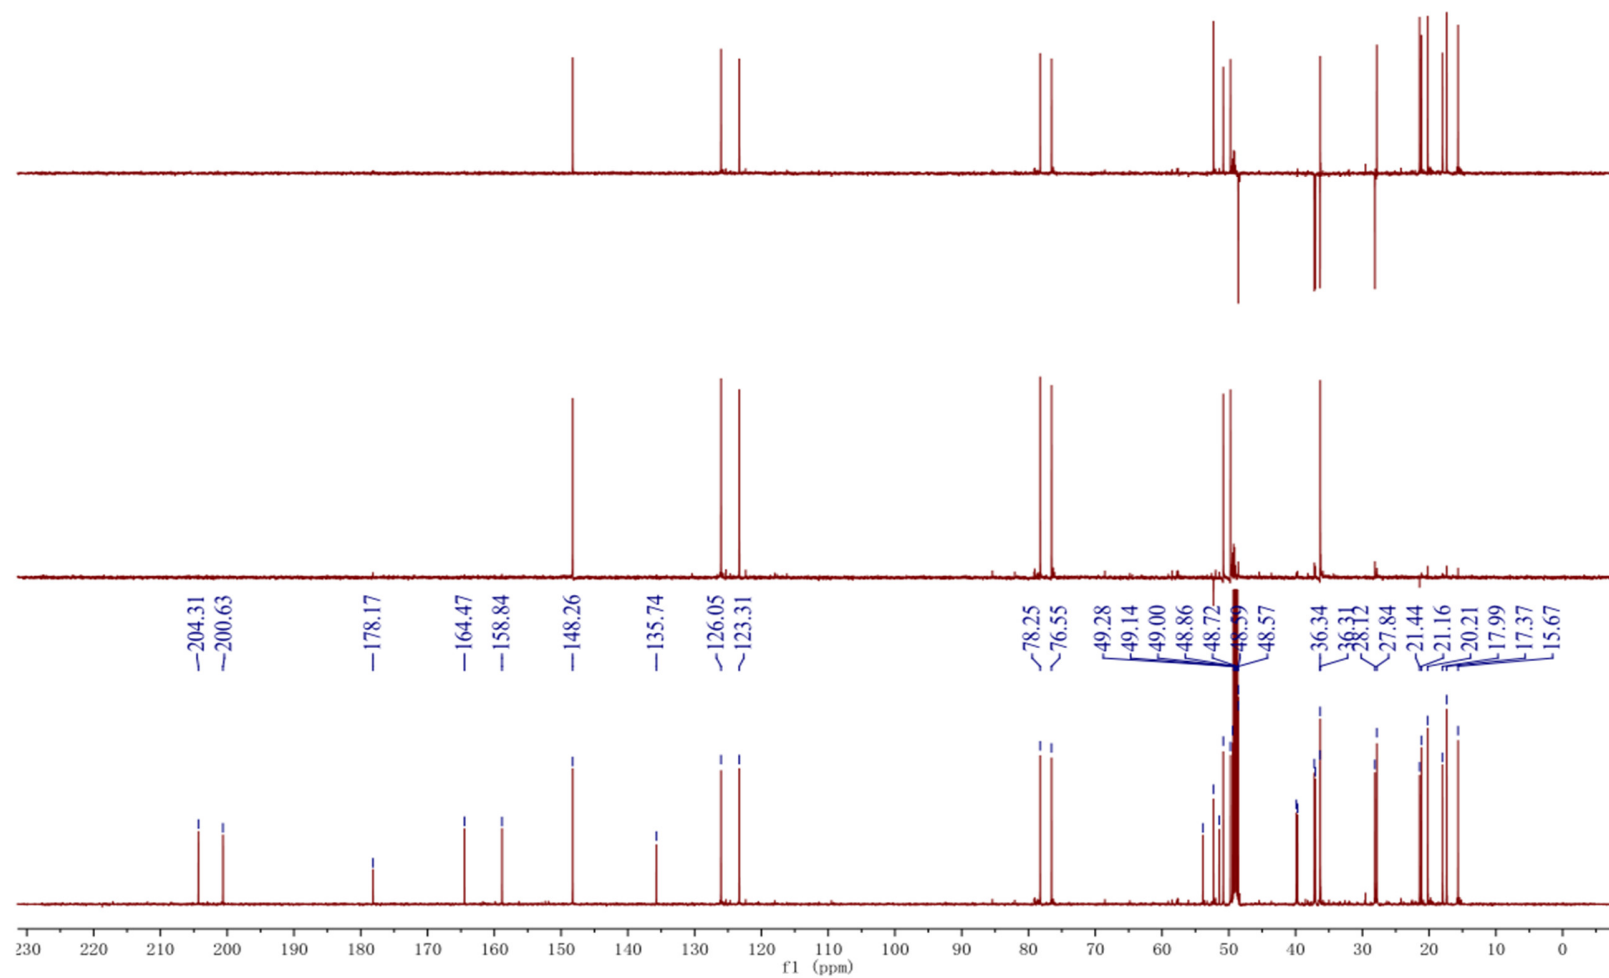

Figure S48.  $^1\text{H}$ - $^1\text{H}$  COSY (600 MHz,  $\text{MeOH-}d_4$ ) spectrum of 7.

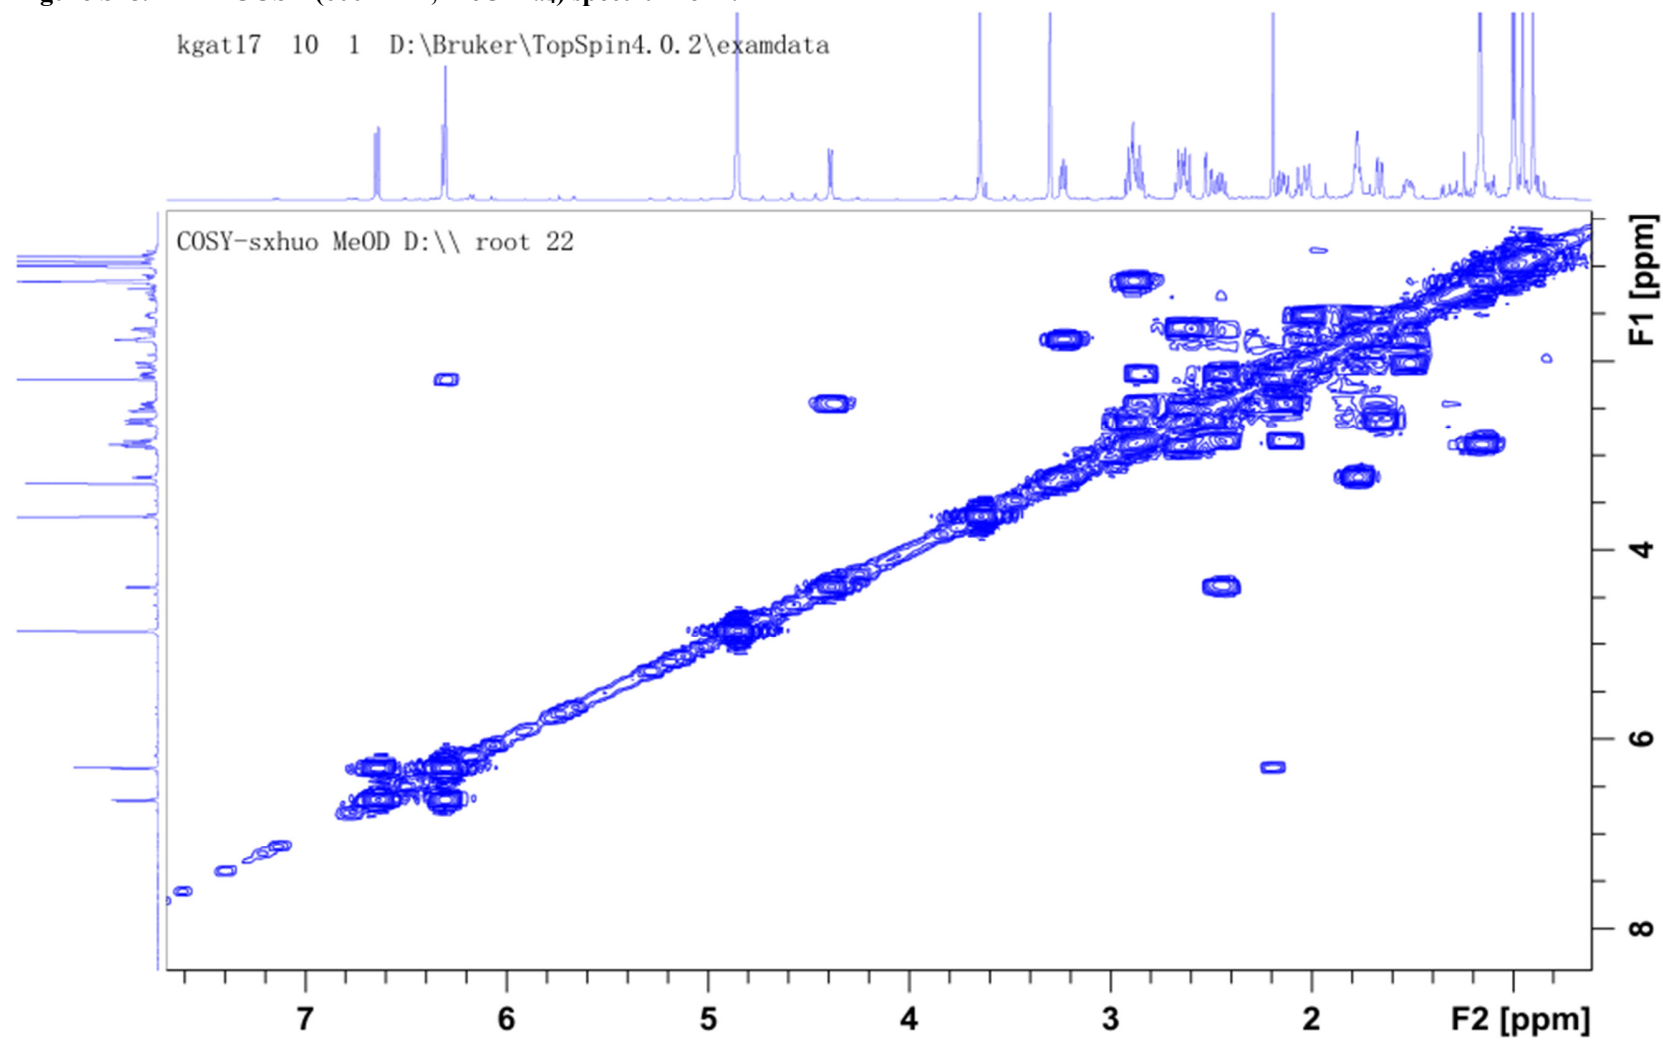

Figure S49. HSQC (600/150 MHz, MeOH-*d*<sub>4</sub>) spectrum of 7.

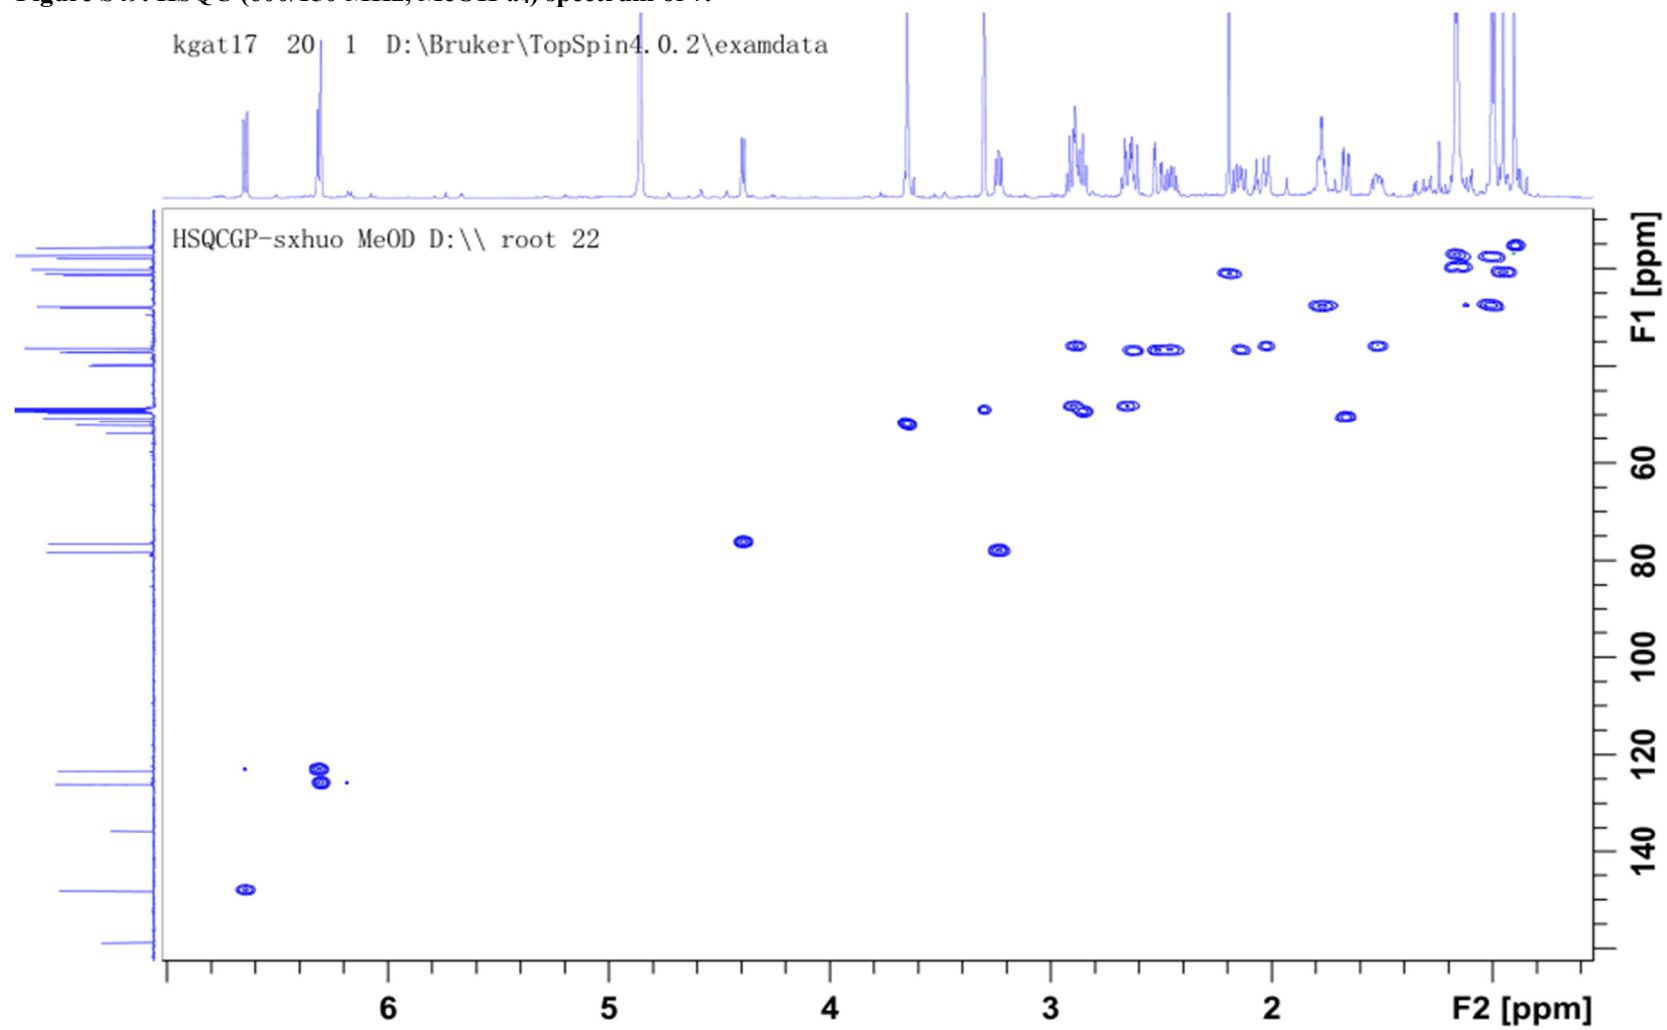

Figure S50. HMBC (600/150 MHz, MeOH-*d*<sub>4</sub>) spectrum of 7.

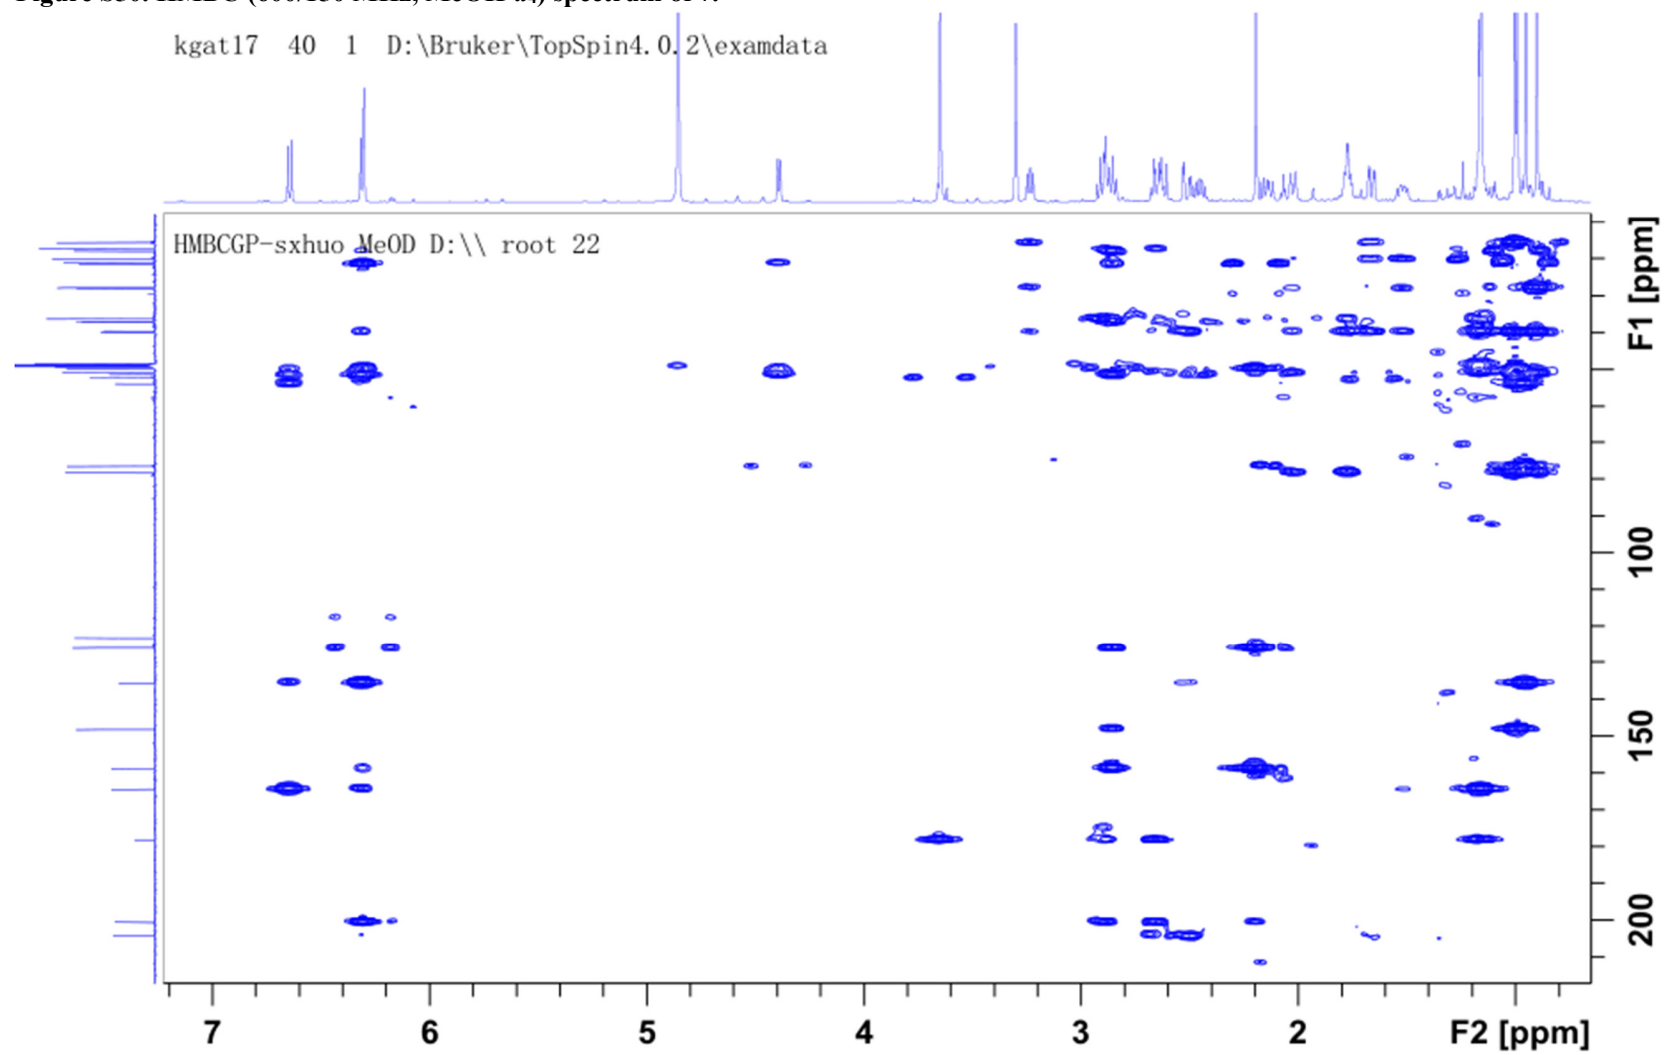

Figure S51. ROESY (600/150 MHz, MeOH-*d*<sub>4</sub>) spectrum of 7.

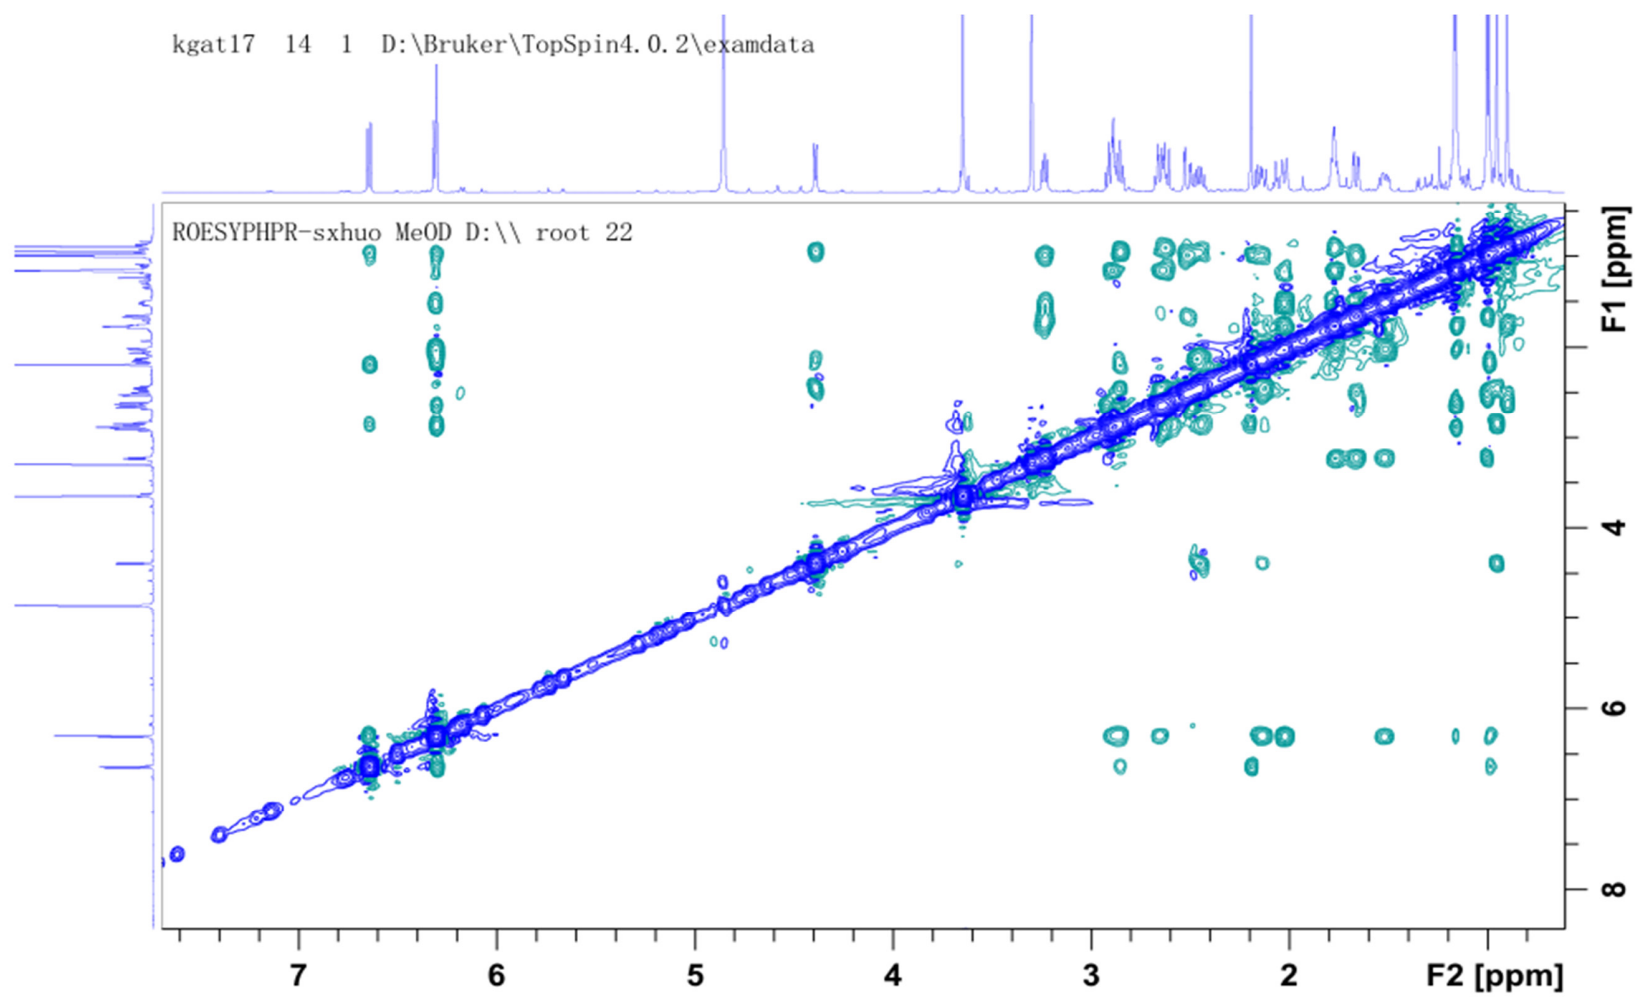



## Section S16: HRESIMS spectrum of 7

Figure S52. HRESIMS spectrum of 7.

### Qualitative Analysis Report

|                               |              |                      |                       |
|-------------------------------|--------------|----------------------|-----------------------|
| <b>Data Filename</b>          | kgat17.d     | <b>Sample Name</b>   | kgat17                |
| <b>Sample Type</b>            | Sample       | <b>Position</b>      | P1-A6                 |
| <b>Instrument Name</b>        | Instrument 1 | <b>User Name</b>     |                       |
| <b>Acq Method</b>             | s.m          | <b>Acquired Time</b> | 2/25/2021 11:42:54 AM |
| <b>IRM Calibration Status</b> | Success      | <b>DA Method</b>     | Default.m             |
| <b>Comment</b>                |              |                      |                       |

  

|                       |                             |
|-----------------------|-----------------------------|
| <b>Sample Group</b>   | Info.                       |
| <b>Acquisition SW</b> | 6200 series TOF/6500 series |
| <b>Version</b>        | Q-TOF B.05.01 (B5125.2)     |

### User Spectra

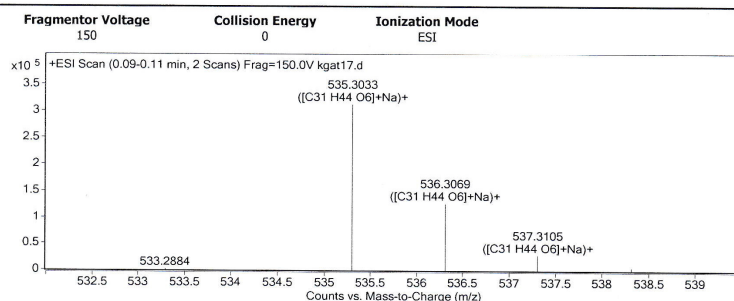

### Peak List

| m/z       | z | Abund     | Formula    | Ion     |
|-----------|---|-----------|------------|---------|
| 102.1274  | 1 | 86095.78  |            |         |
| 146.0803  | 1 | 29545.42  |            |         |
| 172.0936  | 1 | 51061.72  |            |         |
| 513.3209  | 1 | 77645.1   |            |         |
| 514.3248  | 1 | 33235.68  |            |         |
| 535.3033  | 1 | 312486.22 | C31 H44 O6 | (M+Na)+ |
| 536.3069  | 1 | 127098.86 | C31 H44 O6 | (M+Na)+ |
| 1047.6183 | 1 | 225229.94 |            |         |
| 1048.622  | 1 | 183508.3  |            |         |
| 1049.625  | 1 | 76631.34  |            |         |

### Formula Calculator Element Limits

| Element | Min | Max |
|---------|-----|-----|
| C       | 3   | 60  |
| H       | 0   | 120 |
| O       | 0   | 30  |

### Formula Calculator Results

| Formula    | CalculatedMass | CalculatedMz | Mz       | Diff. (mDa) | Diff. (ppm) | DBE     |
|------------|----------------|--------------|----------|-------------|-------------|---------|
| C31 H44 O6 | 512.3138       | 535.3030     | 535.3033 | -0.30       | -0.56       | 10.0000 |

--- End Of Report ---

Section S17: 1D and 2D NMR spectra of compound 8

Figure S53.  $^1\text{H}$  NMR (600 MHz,  $\text{MeOH-}d_4$ ) spectrum of 8.

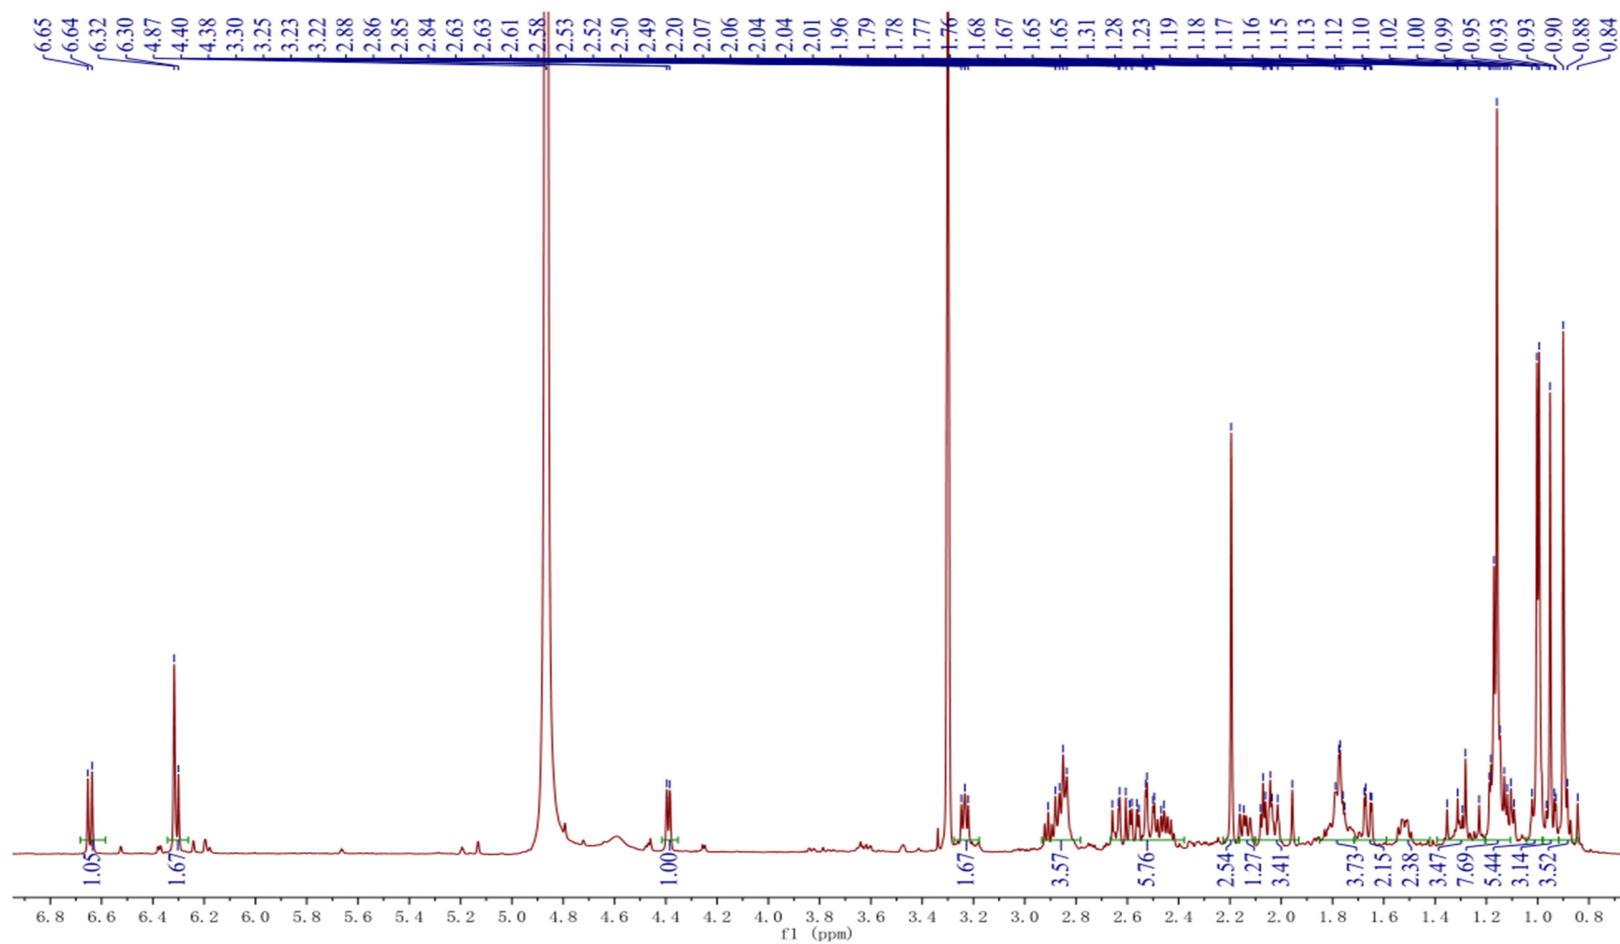

Figure S54.  $^{13}\text{C}$  NMR (150 MHz,  $\text{MeOH-}d_4$ ) spectrum of 8.

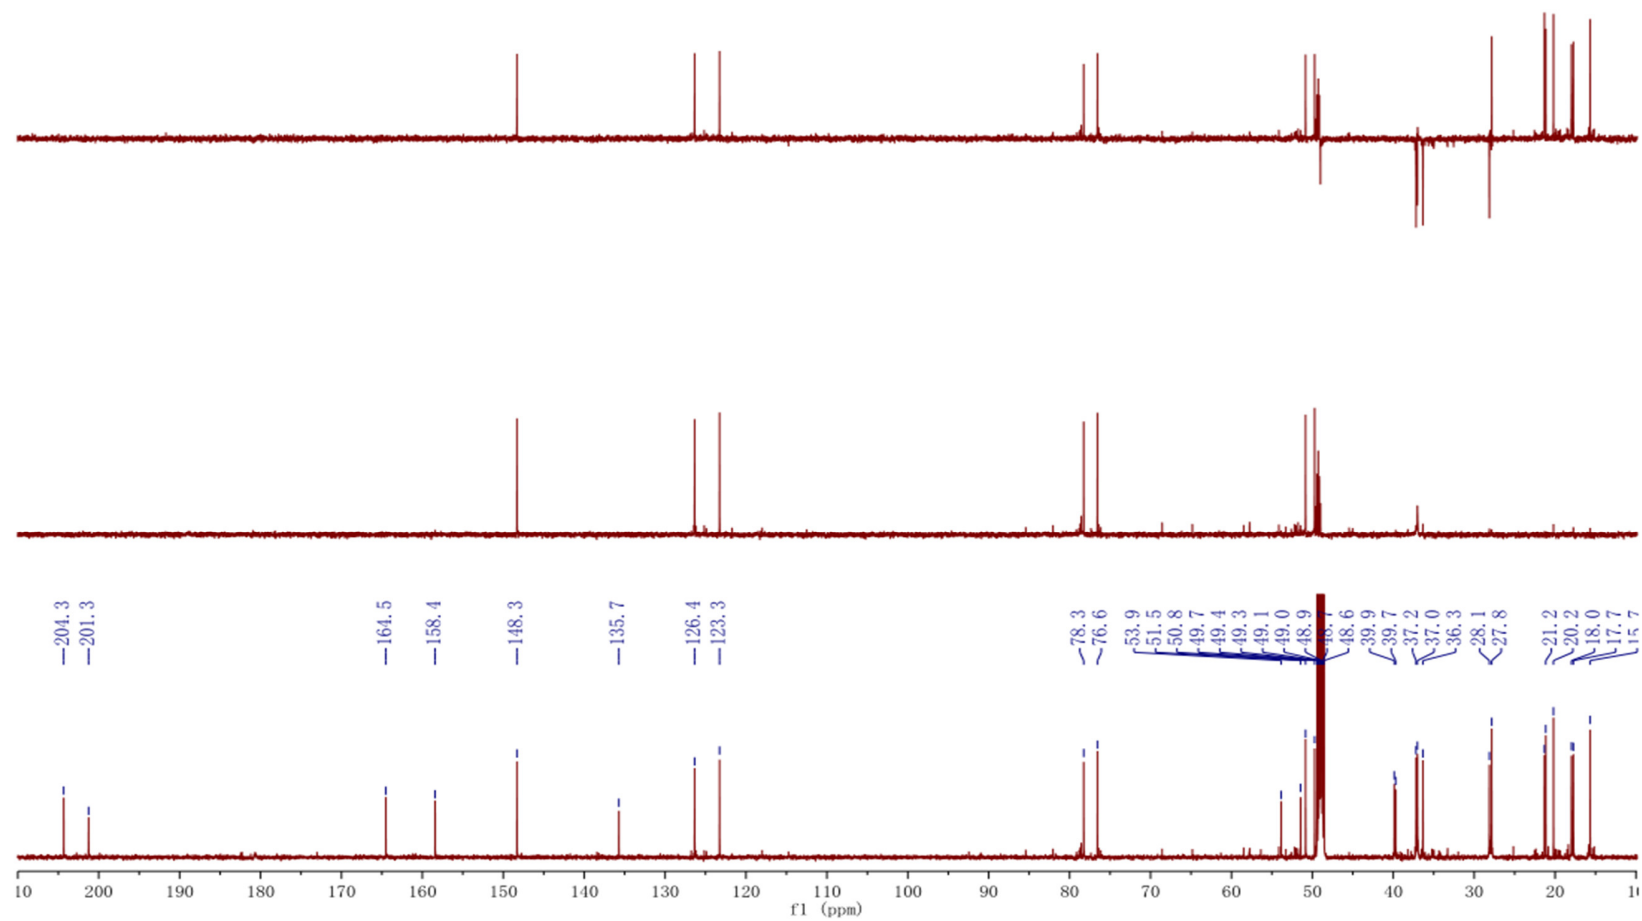

Figure S55.  $^1\text{H}$ - $^1\text{H}$  COSY (600 MHz,  $\text{MeOH-}d_4$ ) spectrum of 8.

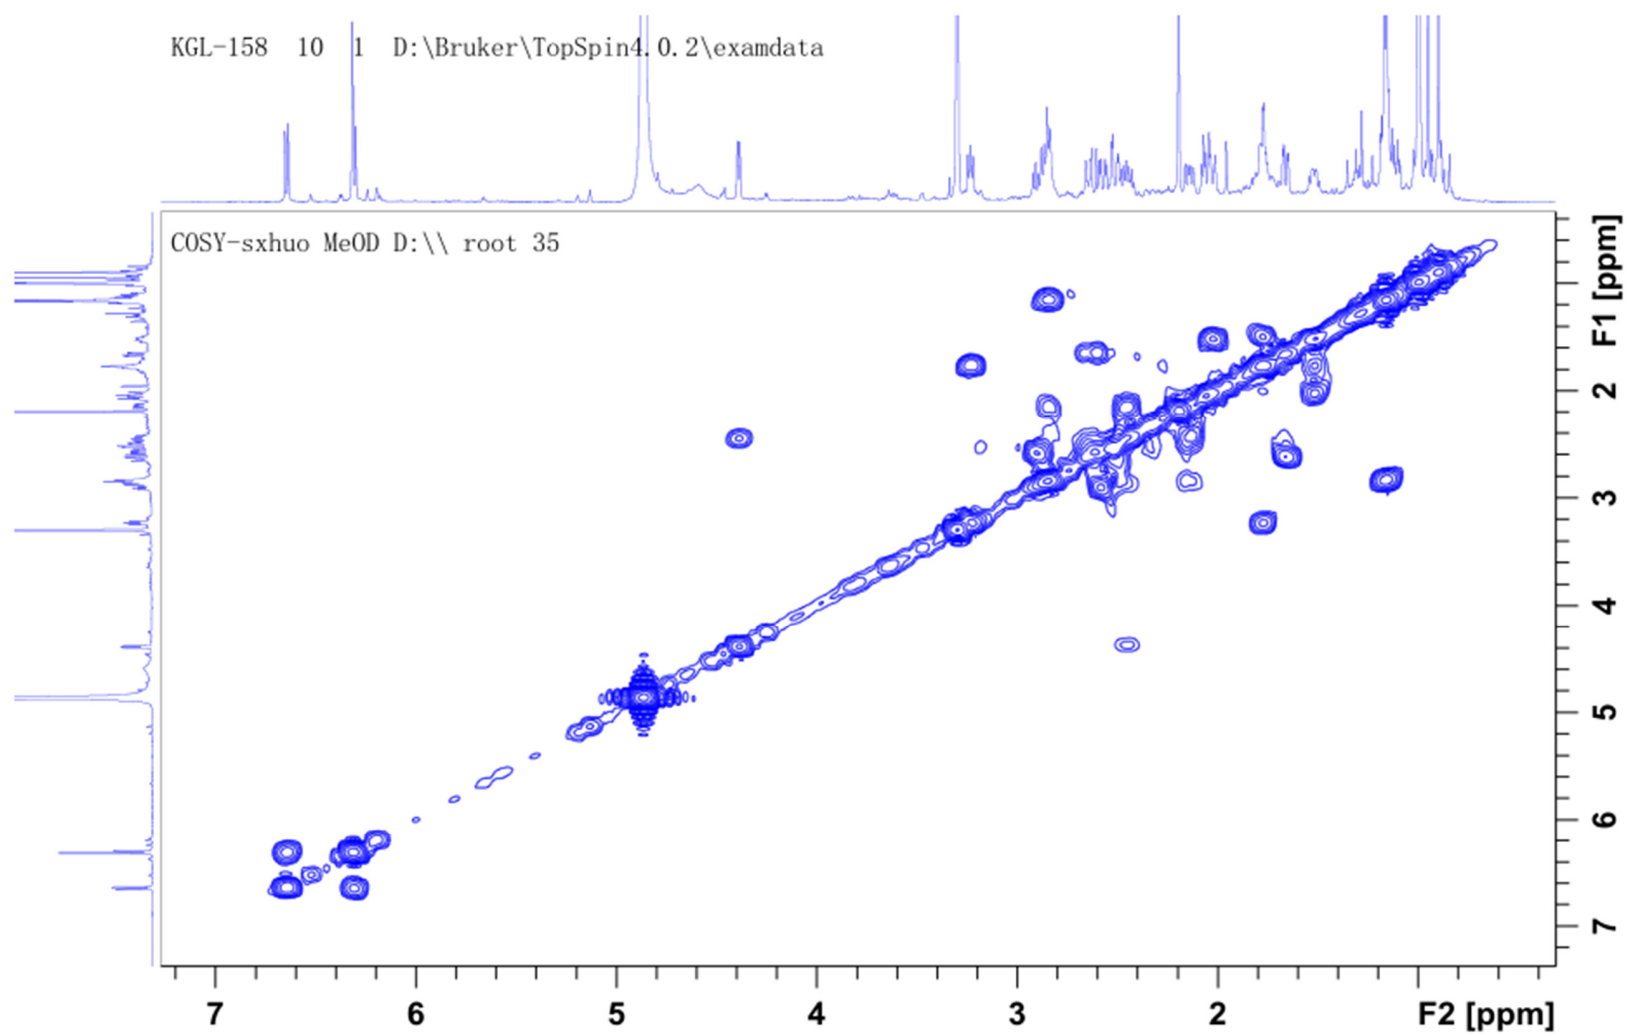

Figure S56. HSQC (600/150 MHz, MeOH-*d*<sub>4</sub>) spectrum of 8.

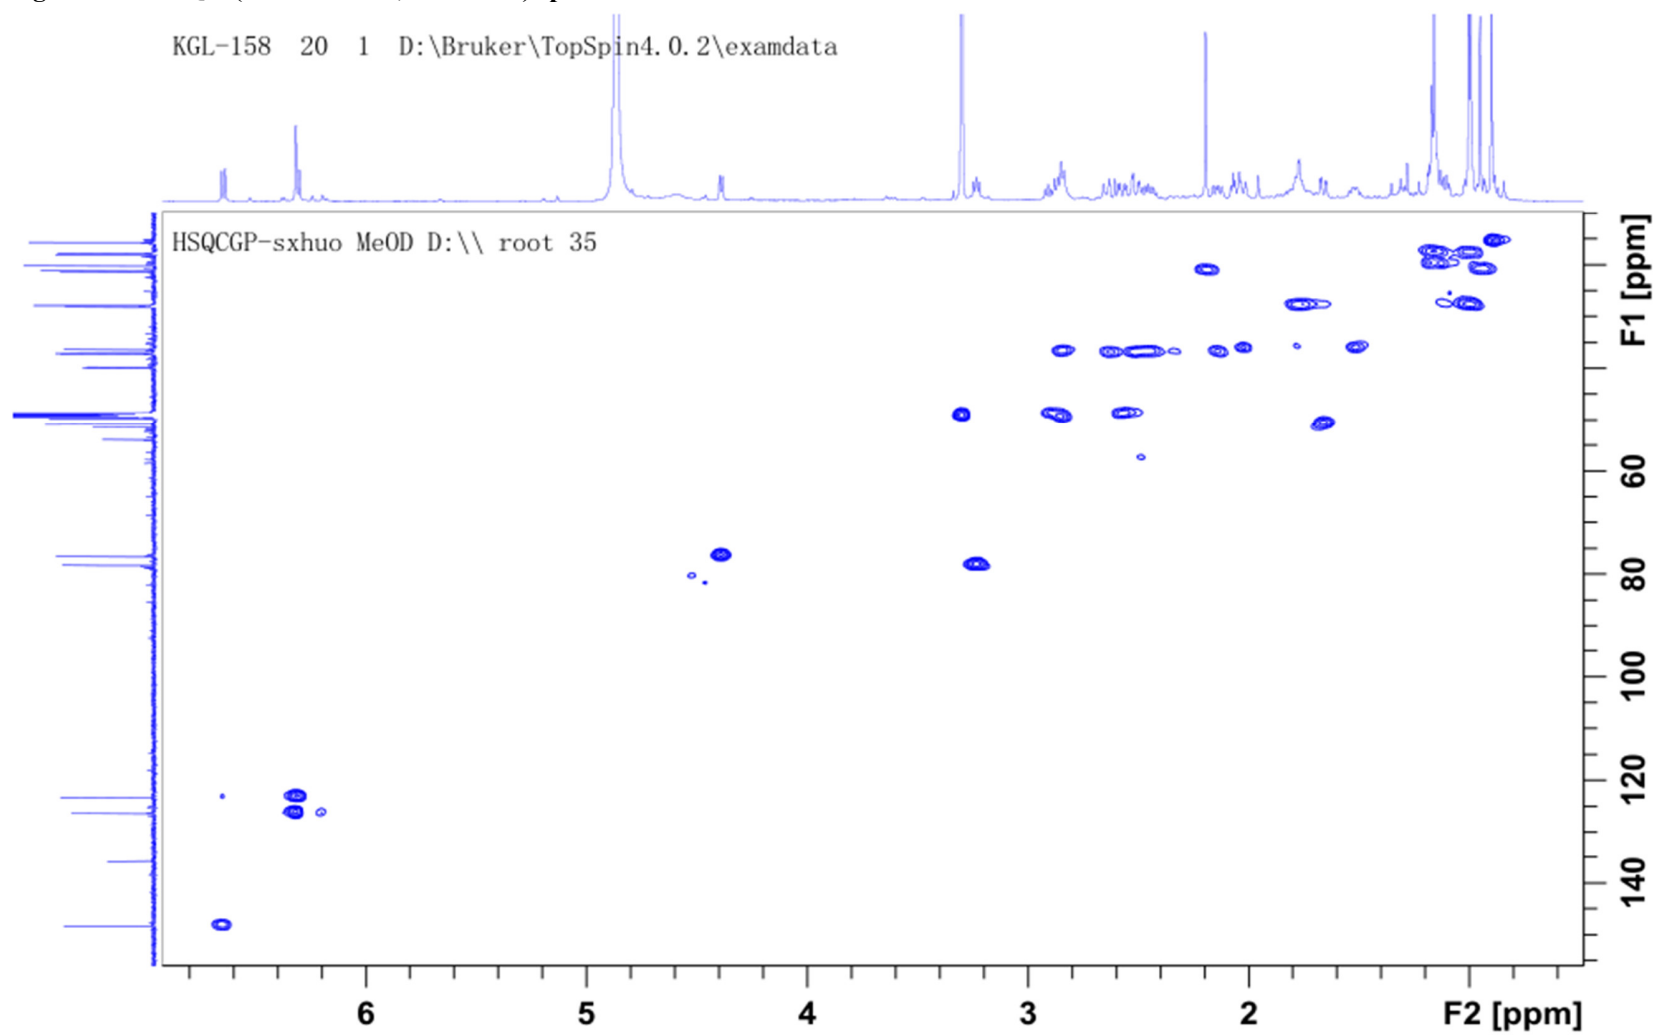

Figure S57. HMBC (600/150 MHz, MeOH-*d*<sub>4</sub>) spectrum of 8.

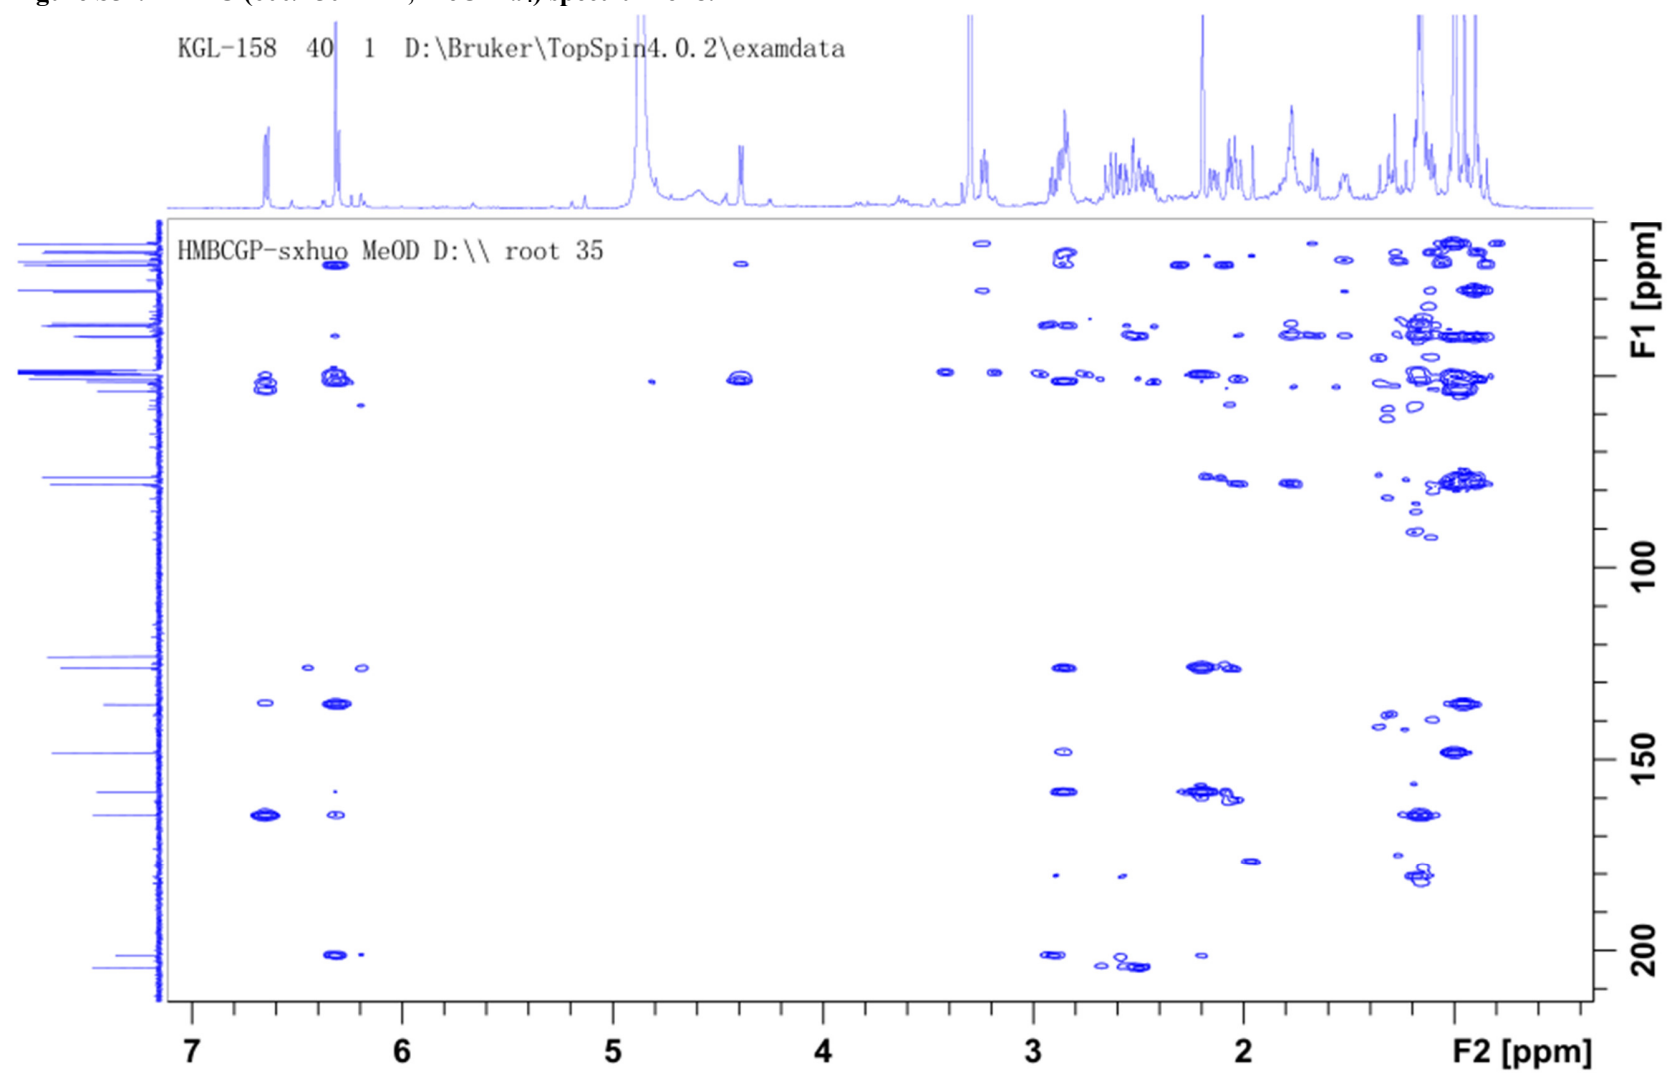

Figure S58. ROESY (600 MHz, MeOH-*d*<sub>4</sub>) spectrum of 8.

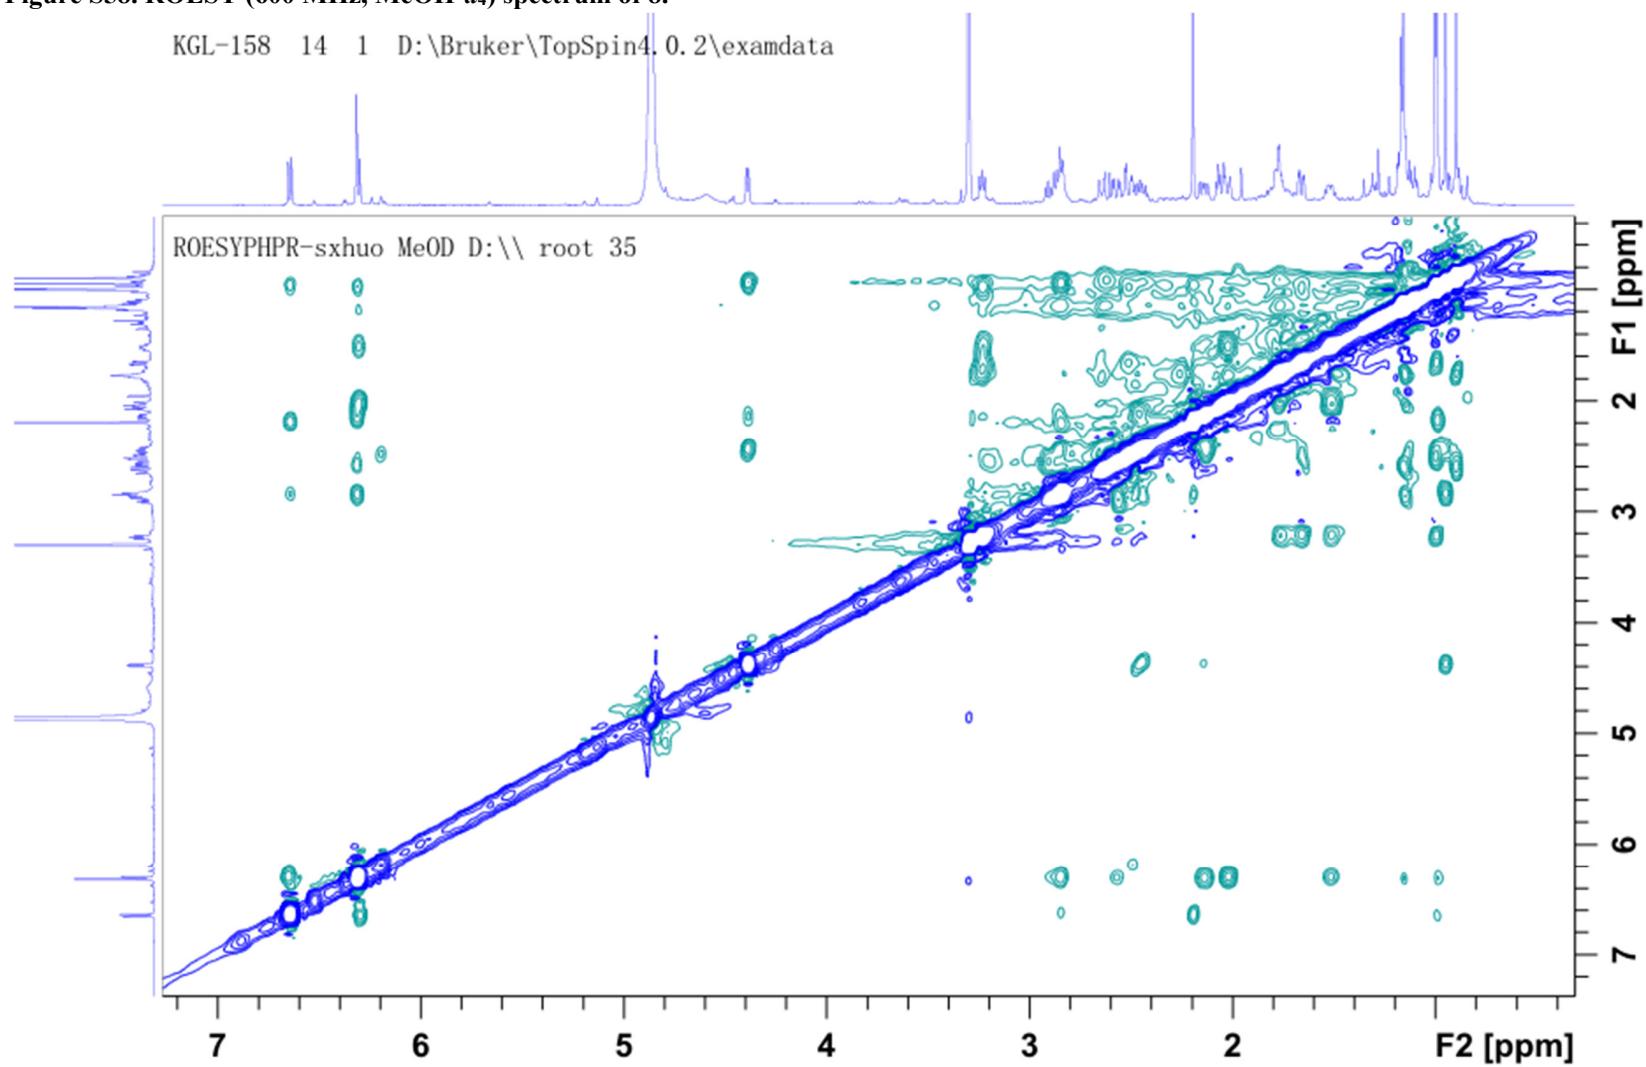

## Section S18: HRESIMS spectrum of 8

Figure S59. HRESIMS spectrum of 8.

### Qualitative Analysis Report

|                               |                                                        |                      |                        |
|-------------------------------|--------------------------------------------------------|----------------------|------------------------|
| <b>Data Filename</b>          | kg1-158.d                                              | <b>Sample Name</b>   | kg1-158                |
| <b>Sample Type</b>            | Sample                                                 | <b>Position</b>      | P1-A2                  |
| <b>Instrument Name</b>        | Instrument 1                                           | <b>User Name</b>     |                        |
| <b>Acq Method</b>             | s-m                                                    | <b>Acquired Time</b> | 10/12/2020 11:08:38 AM |
| <b>IRM Calibration Status</b> | Success                                                | <b>DA Method</b>     | ZRR3.m                 |
| <b>Comment</b>                |                                                        |                      |                        |
| <b>Sample Group</b>           | <b>Info.</b>                                           |                      |                        |
| <b>Acquisition SW Version</b> | 6200 series TOF/6500 series<br>Q-TOF B.05.01 (B5125.2) |                      |                        |

### User Spectra

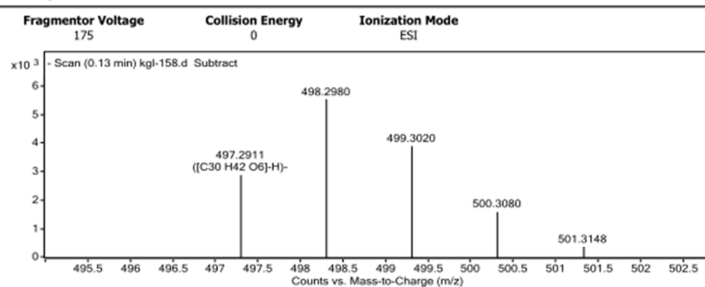

### Peak List

| m/z       | z | Abund   | Formula    | Ion    |
|-----------|---|---------|------------|--------|
| 497.2911  |   | 2925.91 | C30 H42 O6 | (M-H)- |
| 498.298   |   | 5542.1  |            |        |
| 499.302   | 1 | 3925.09 |            |        |
| 500.308   | 1 | 1642.42 |            |        |
| 512.2784  |   | 921.76  |            |        |
| 513.2855  |   | 1117.4  |            |        |
| 514.292   | 1 | 1240.95 |            |        |
| 515.3006  | 1 | 692.01  |            |        |
| 566.2904  | 1 | 797.03  |            |        |
| 1033.9881 |   | 1762.93 |            |        |

### Formula Calculator Element Limits

| Element | Min | Max |
|---------|-----|-----|
| C       | 3   | 60  |
| H       | 0   | 120 |
| O       | 0   | 30  |

### Formula Calculator Results

| Formula    | CalculatedMass | CalculatedMz | Mz       | Diff. (mDa) | Diff. (ppm) | DBE     |
|------------|----------------|--------------|----------|-------------|-------------|---------|
| C30 H42 O6 | 498.2981       | 497.2909     | 497.2911 | -0.20       | -0.40       | 10.0000 |

--- End Of Report ---



# Section S19: 1D and 2D NMR spectra of compound 9

Figure S60. <sup>1</sup>H NMR (600 MHz, CDCl<sub>3</sub>) spectrum of 9.

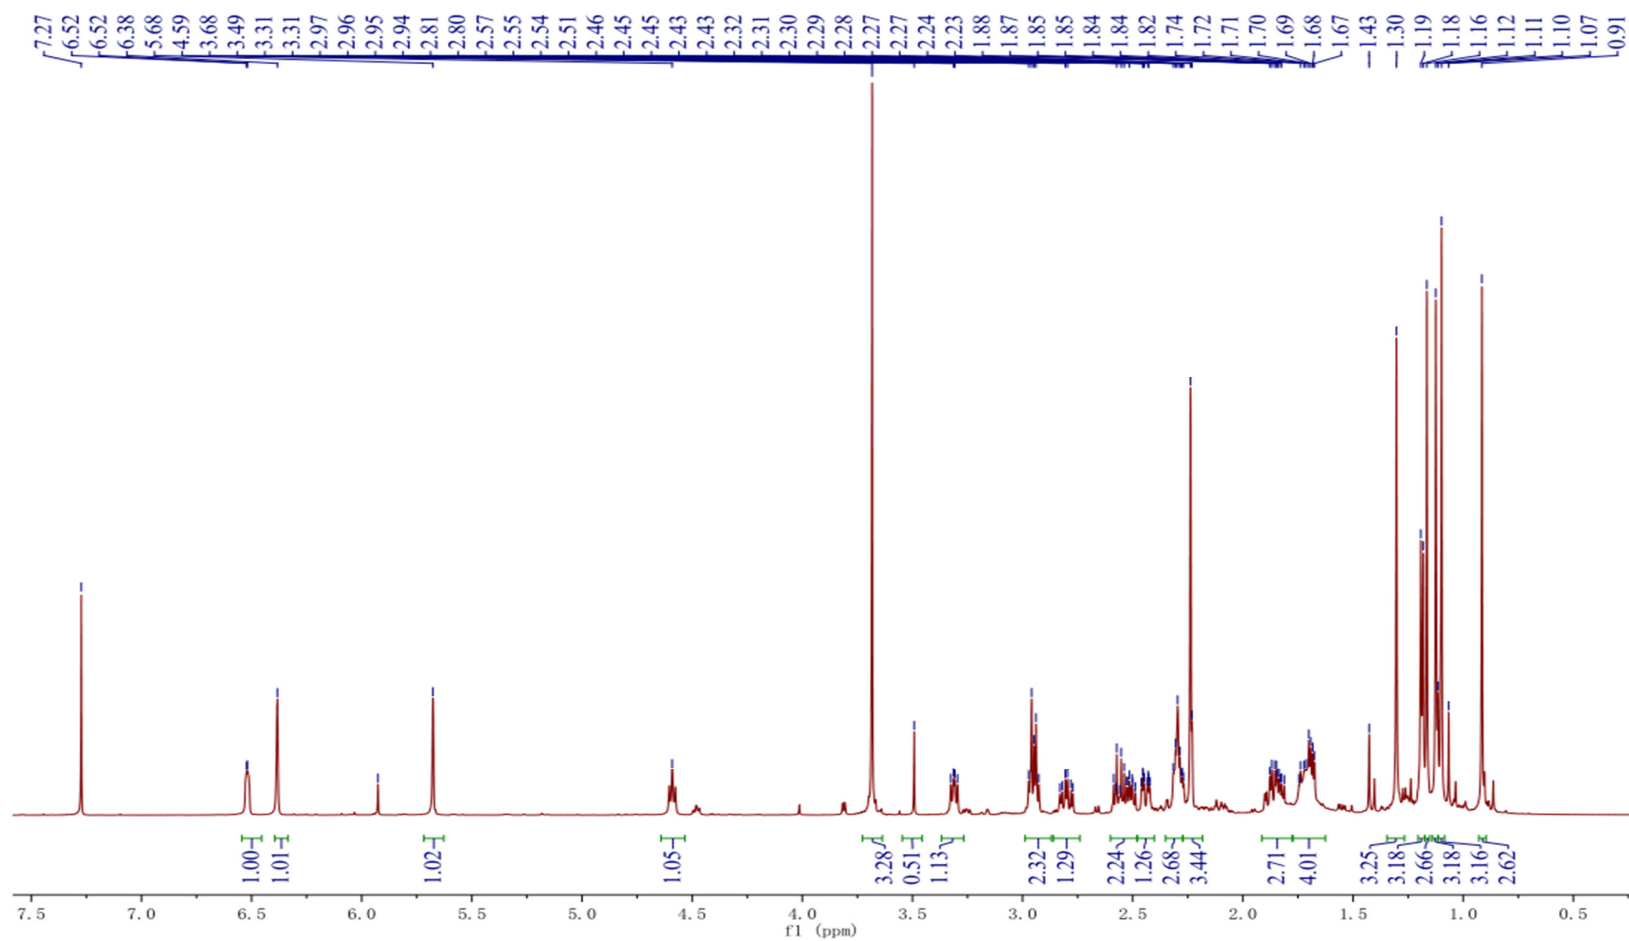

Figure S61.  $^{13}\text{C}$  NMR (150 MHz,  $\text{CDCl}_3$ ) spectrum of 9.

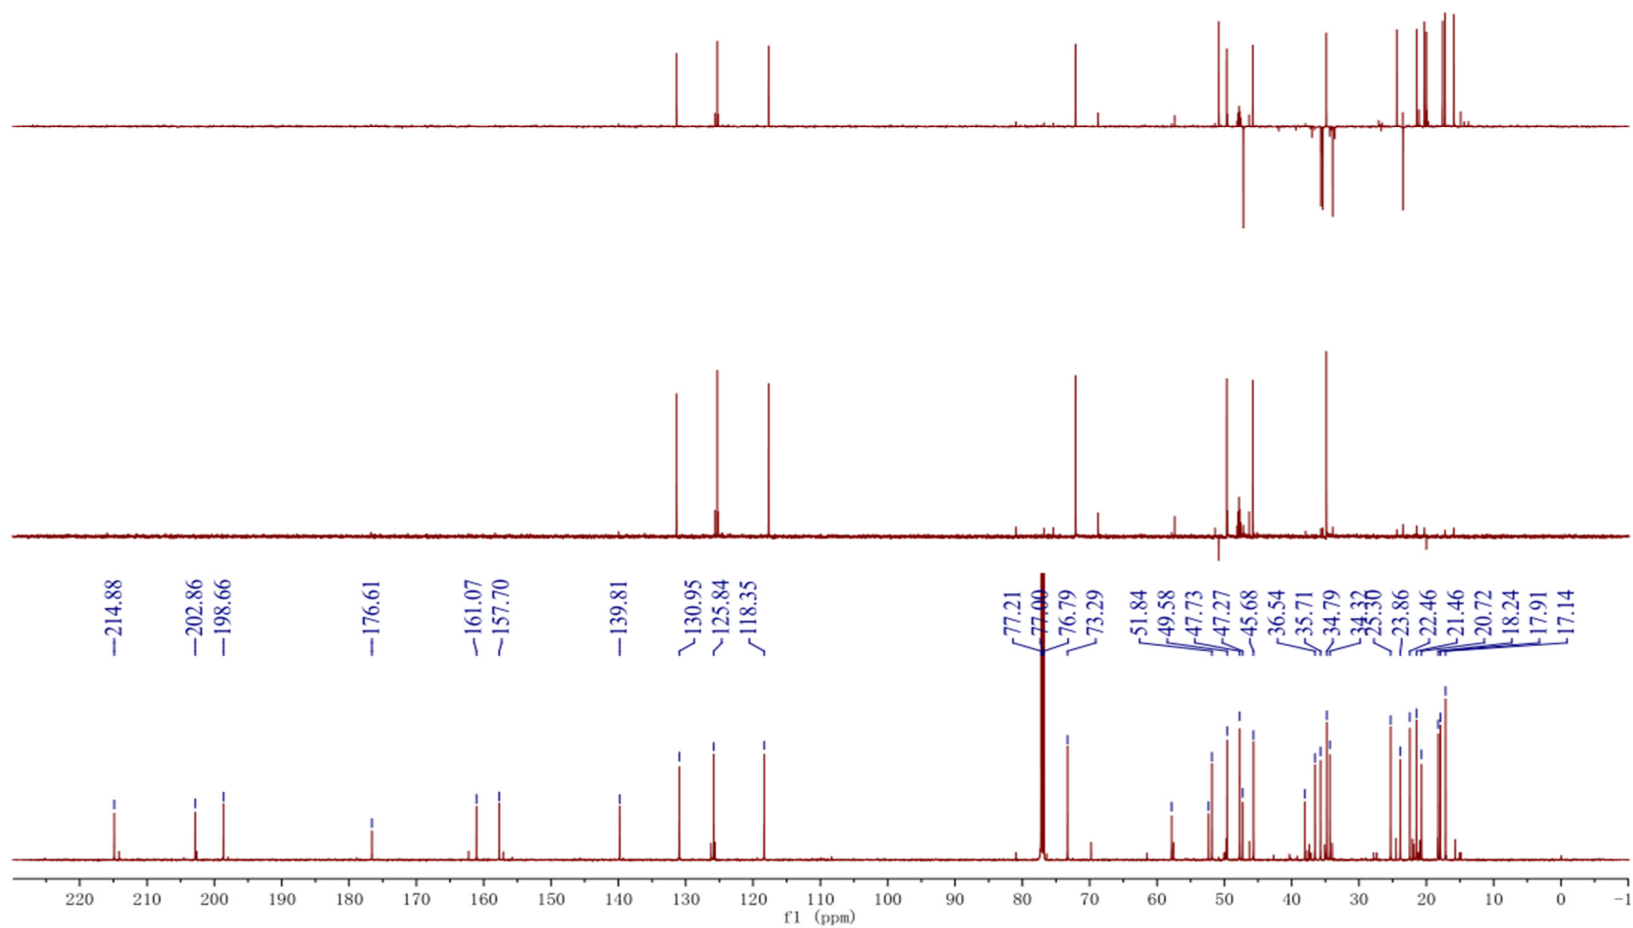

Figure S62.  $^1\text{H}$ - $^1\text{H}$  COSY (600 MHz,  $\text{CDCl}_3$ ) spectrum of 9.

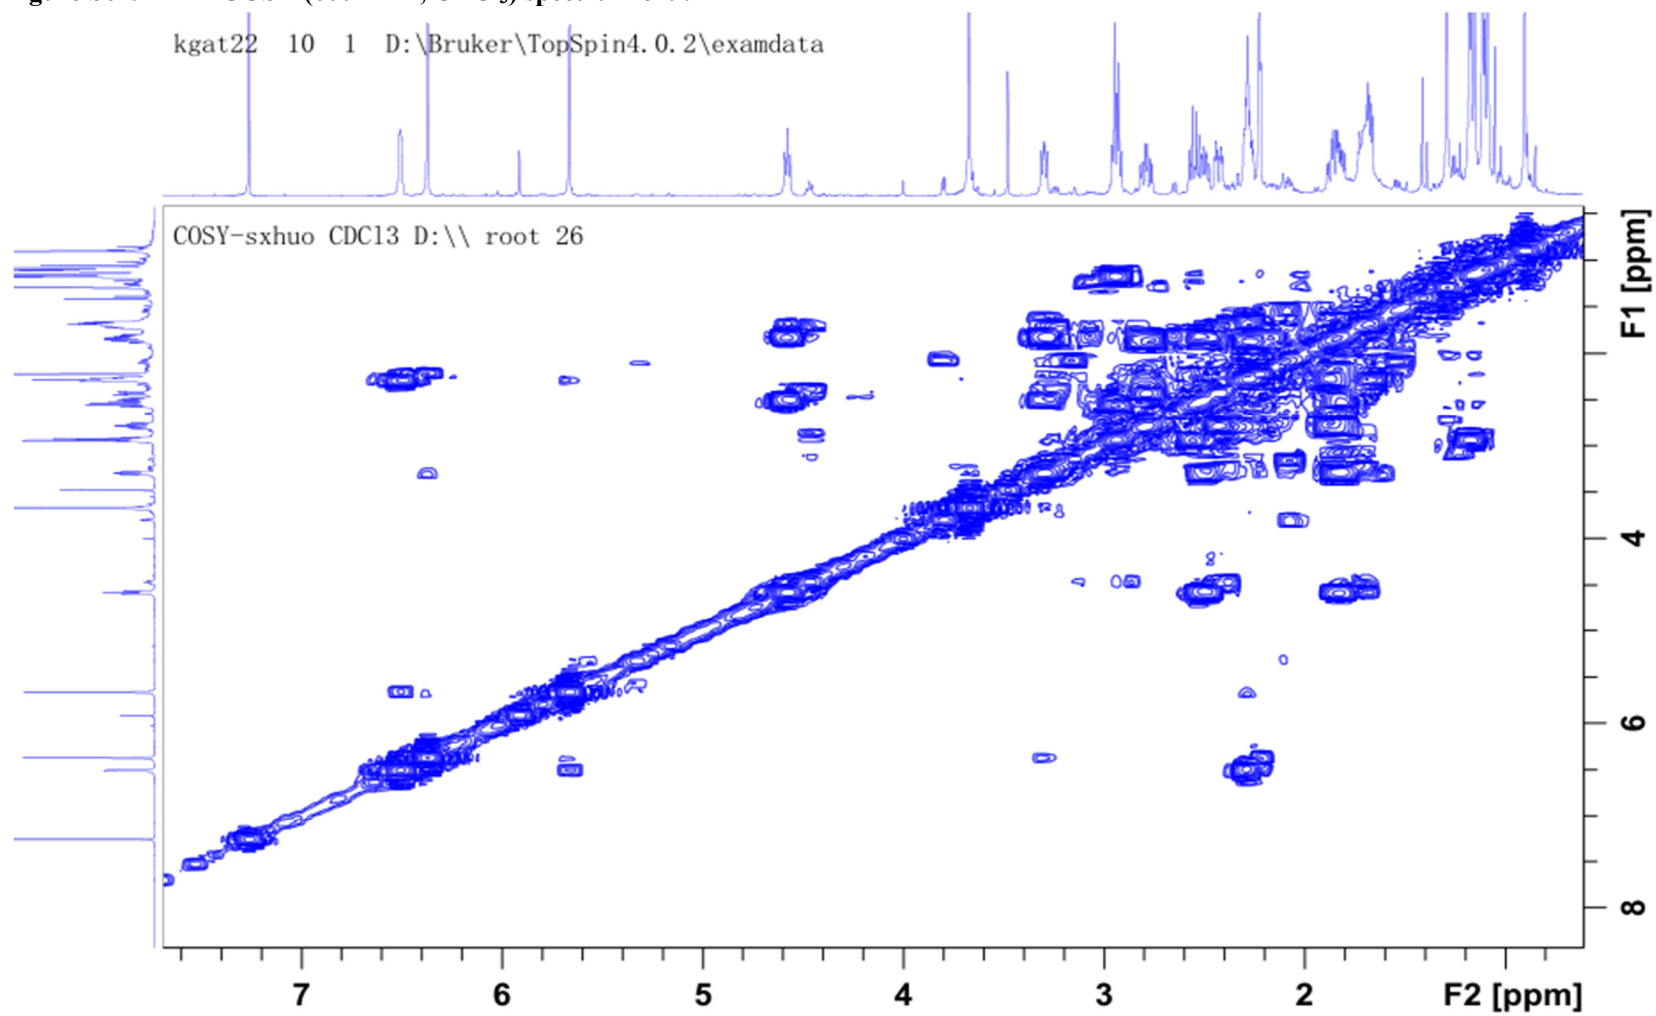

Figure S63. HSQC (600/150 MHz, CDCl<sub>3</sub>) spectrum of 9.

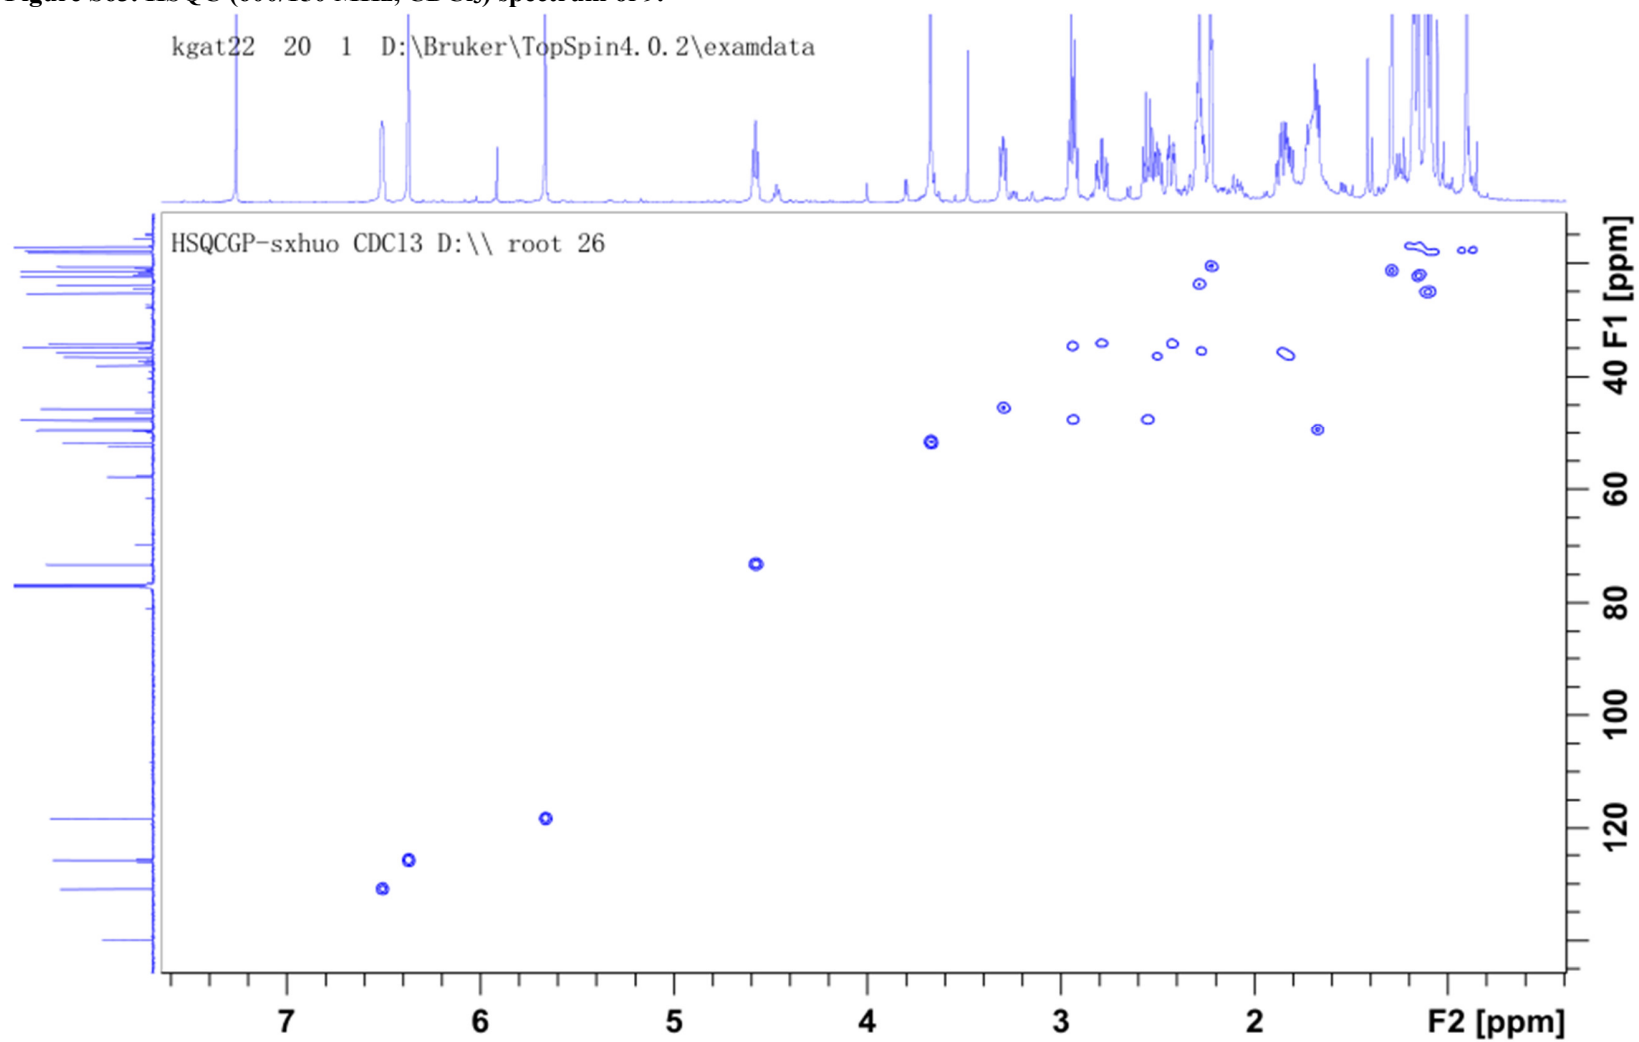

Figure S64. HMBC (600/150 MHz, CDCl<sub>3</sub>) spectrum of 9.

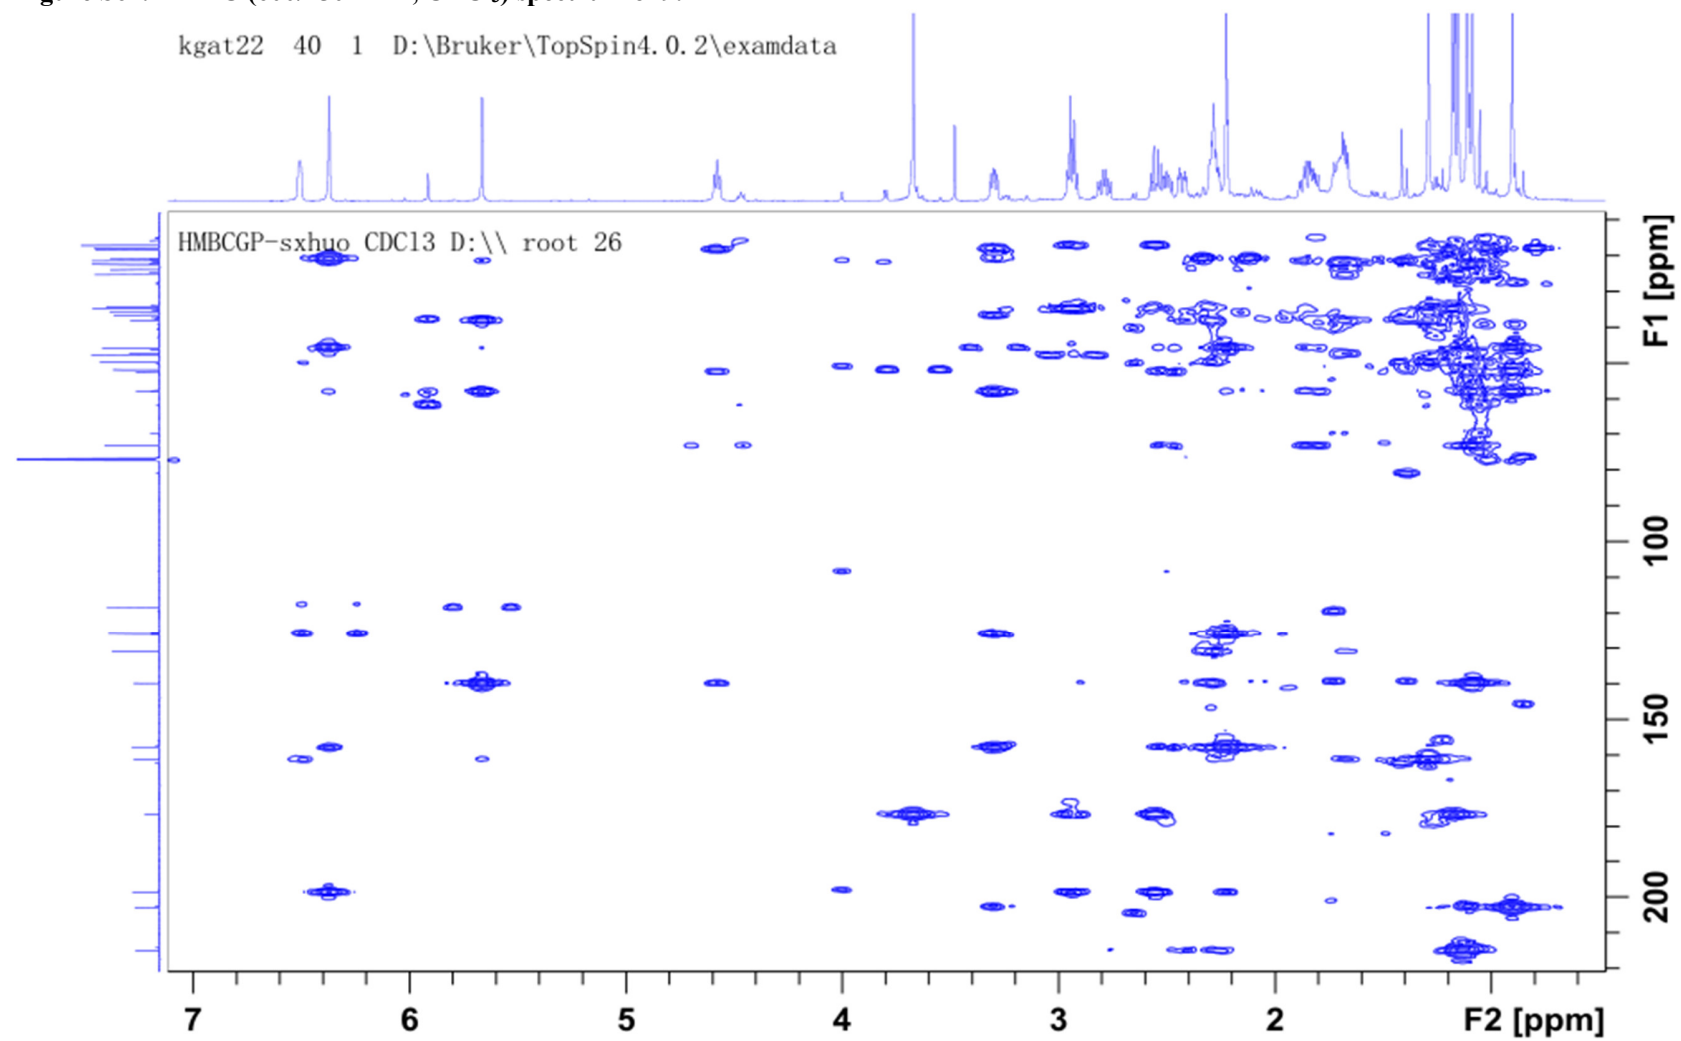

Figure S65. ROESY (600/150 MHz, CDCl<sub>3</sub>) spectrum of 9.

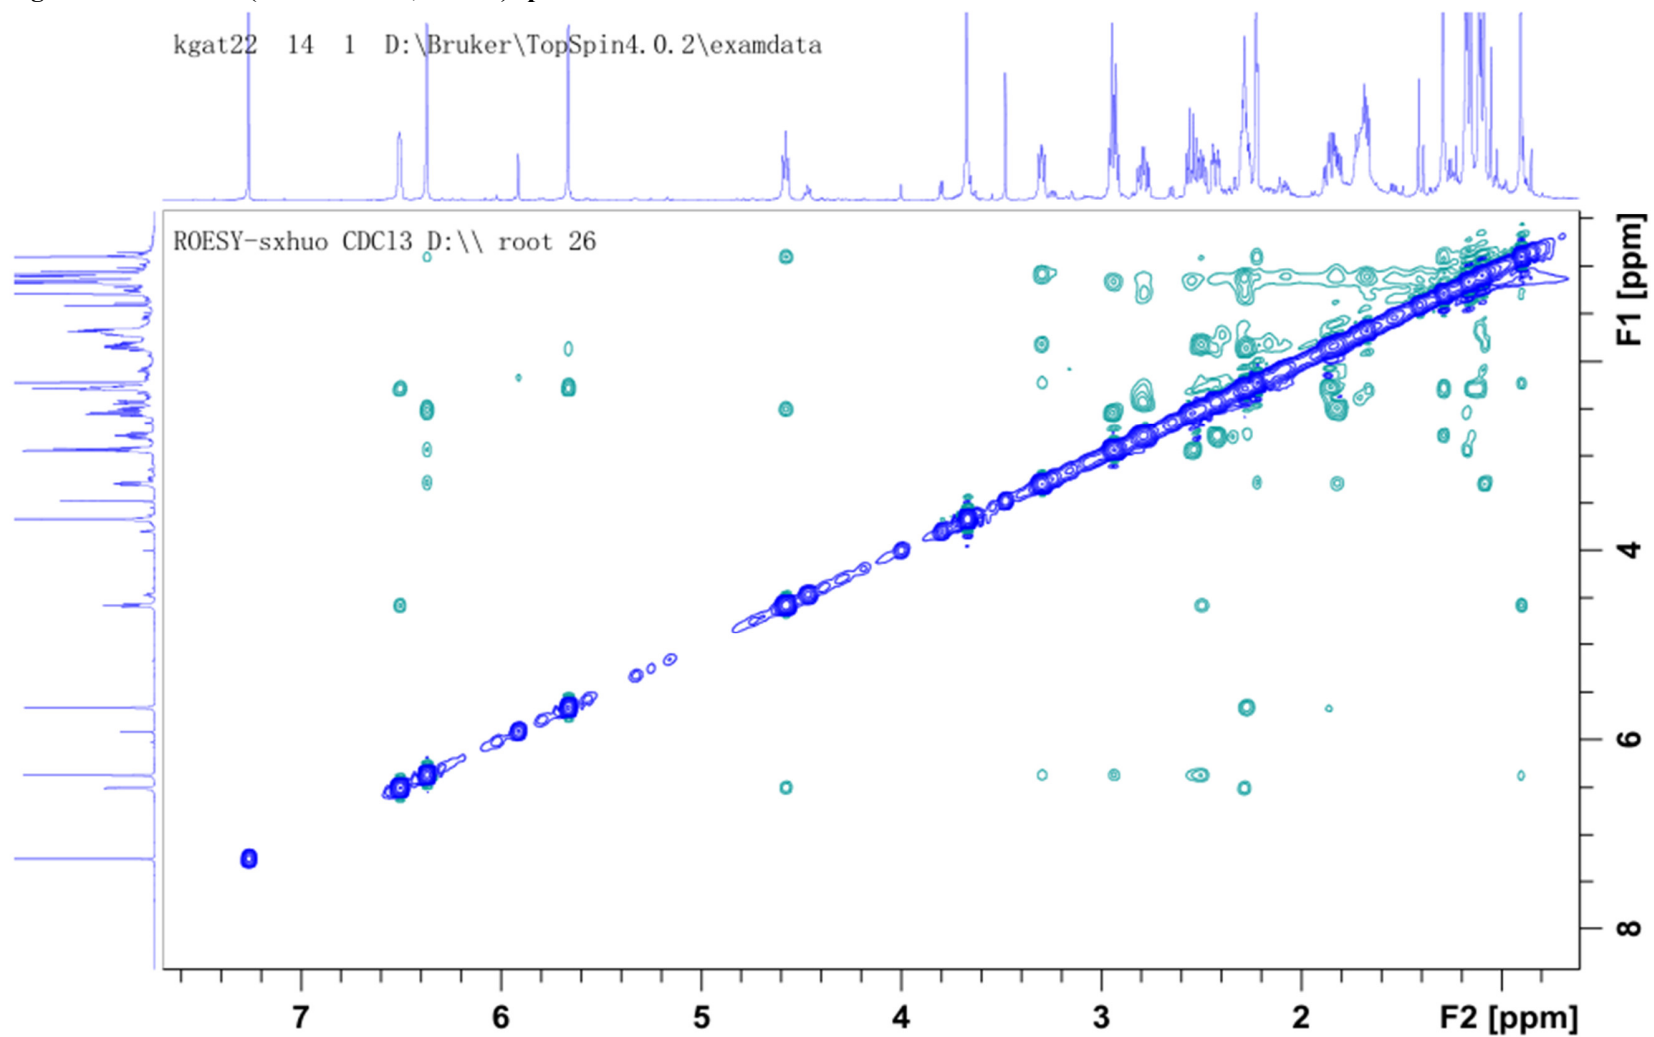

**Section S20: HRESIMS spectrum of 9**

**Figure S66. HRESIMS spectrum of 9.**

### Qualitative Analysis Report

|                               |              |                      |                       |
|-------------------------------|--------------|----------------------|-----------------------|
| <b>Data Filename</b>          | kgat22.d     | <b>Sample Name</b>   | kgat22                |
| <b>Sample Type</b>            | Sample       | <b>Position</b>      | P1-A9                 |
| <b>Instrument Name</b>        | Instrument 1 | <b>User Name</b>     |                       |
| <b>Acq Method</b>             | s.m          | <b>Acquired Time</b> | 2/25/2021 11:46:27 AM |
| <b>IRM Calibration Status</b> | Success      | <b>DA Method</b>     | Default.m             |
| <b>Comment</b>                |              |                      |                       |

  

|                       |                             |
|-----------------------|-----------------------------|
| <b>Sample Group</b>   | <b>Info.</b>                |
| <b>Acquisition SW</b> | 6200 series TOF/6500 series |
| <b>Version</b>        | Q-TOF B.05.01 (B5125.2)     |

#### User Spectra

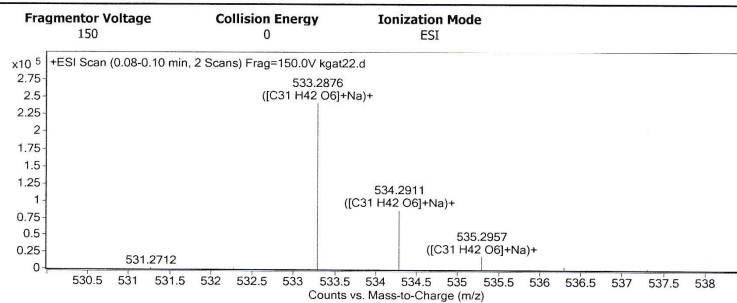

#### Peak List

| m/z       | z | Abund     | Formula    | Ion     |
|-----------|---|-----------|------------|---------|
| 102.1274  | 1 | 24207.48  |            |         |
| 172.0936  | 1 | 56103.34  |            |         |
| 511.3051  | 1 | 46827.01  |            |         |
| 533.2876  | 1 | 242101.48 | C31 H42 O6 | (M+Na)+ |
| 534.2911  | 1 | 87653.3   | C31 H42 O6 | (M+Na)+ |
| 549.2734  | 1 | 36785.6   |            |         |
| 1043.5863 | 1 | 125190.95 |            |         |
| 1044.5899 | 1 | 93311.35  |            |         |
| 1045.5928 | 1 | 41897.05  |            |         |
| 1059.5807 | 1 | 31313.65  |            |         |

#### Formula Calculator Element Limits

| Element | Min | Max |
|---------|-----|-----|
| C       | 3   | 60  |
| H       | 0   | 120 |
| O       | 0   | 30  |

#### Formula Calculator Results

| Formula    | CalculatedMass | CalculatedMz | Mz       | Diff. (mDa) | Diff. (ppm) | DBE     |
|------------|----------------|--------------|----------|-------------|-------------|---------|
| C31 H42 O6 | 510.2981       | 533.2874     | 533.2876 | -0.20       | -0.38       | 11.0000 |

--- End Of Report ---

# Section S21: 1D and 2D NMR spectra of compound 10

Figure S67. <sup>1</sup>H NMR (600 MHz, MeOH-*d*<sub>4</sub>) spectrum of 10.

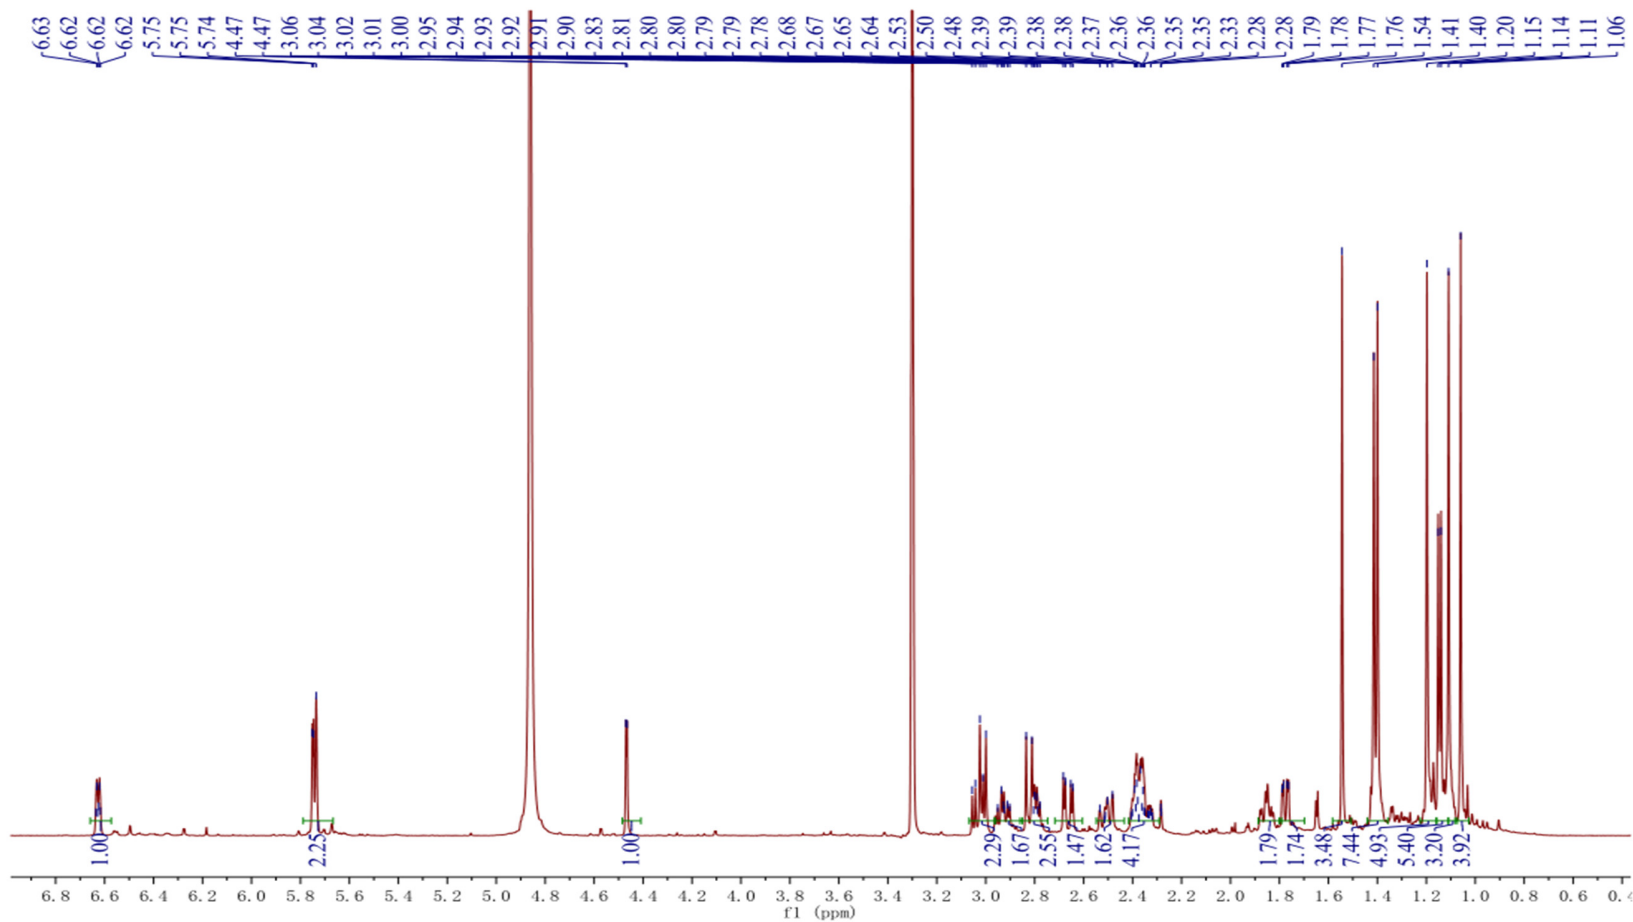



Figure S68.  $^{13}\text{C}$  NMR (150 MHz,  $\text{MeOH-}d_4$ ) spectrum of 10.

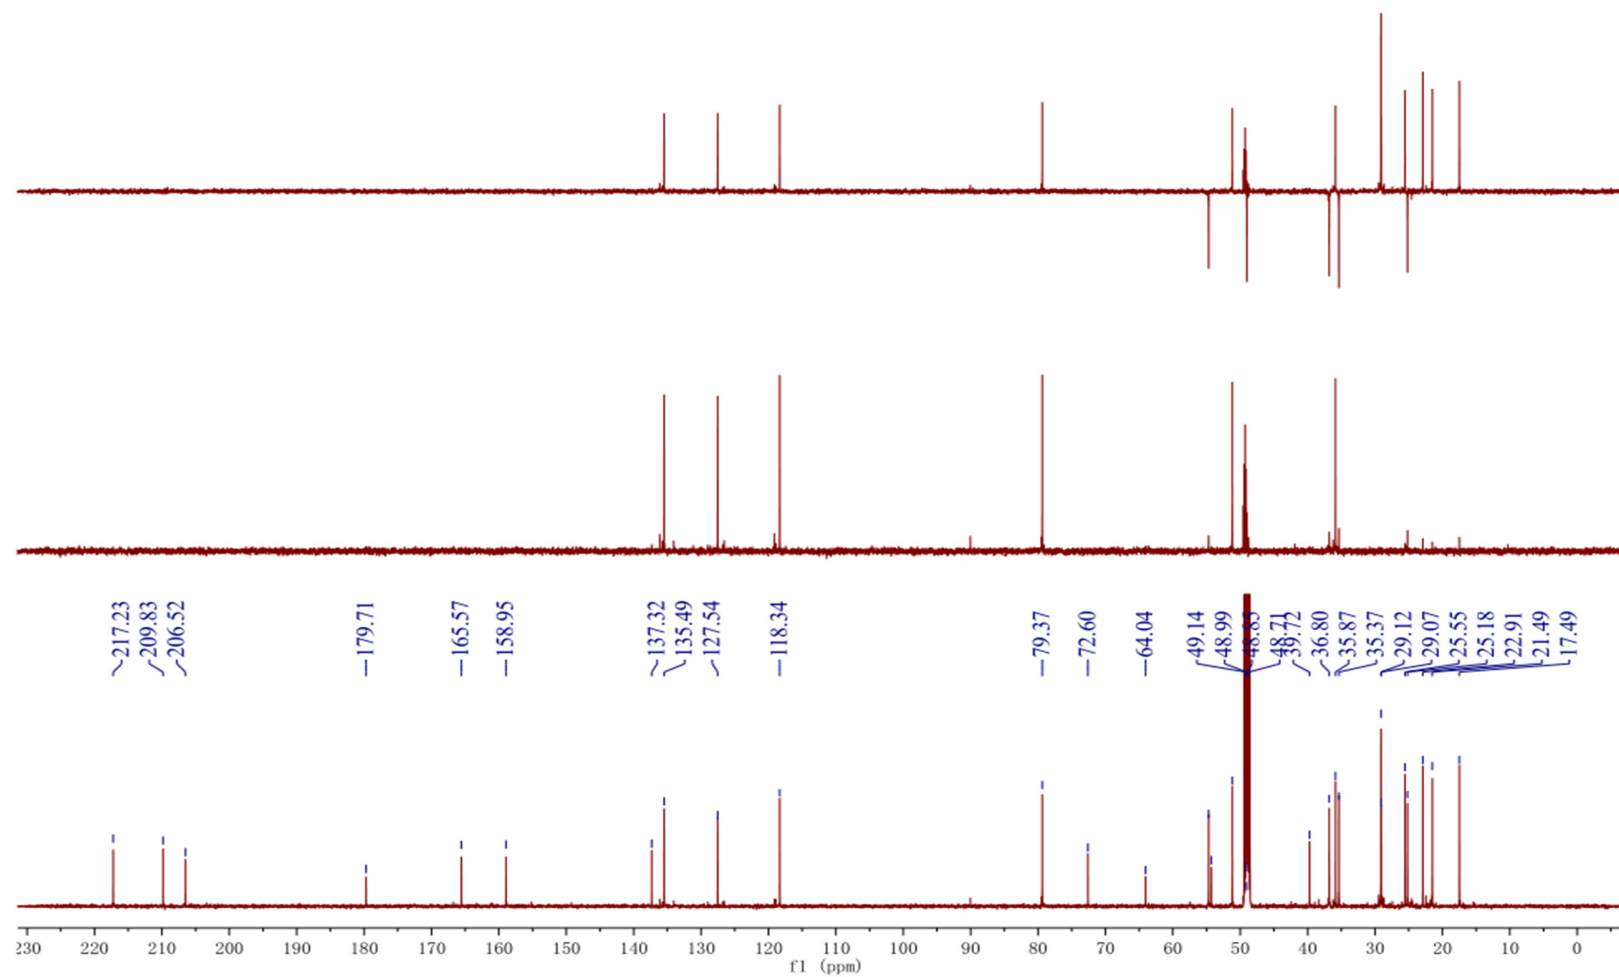

Figure S69.  $^1\text{H}$ - $^1\text{H}$  COSY (600 MHz,  $\text{MeOH-}d_4$ ) spectrum of 10.

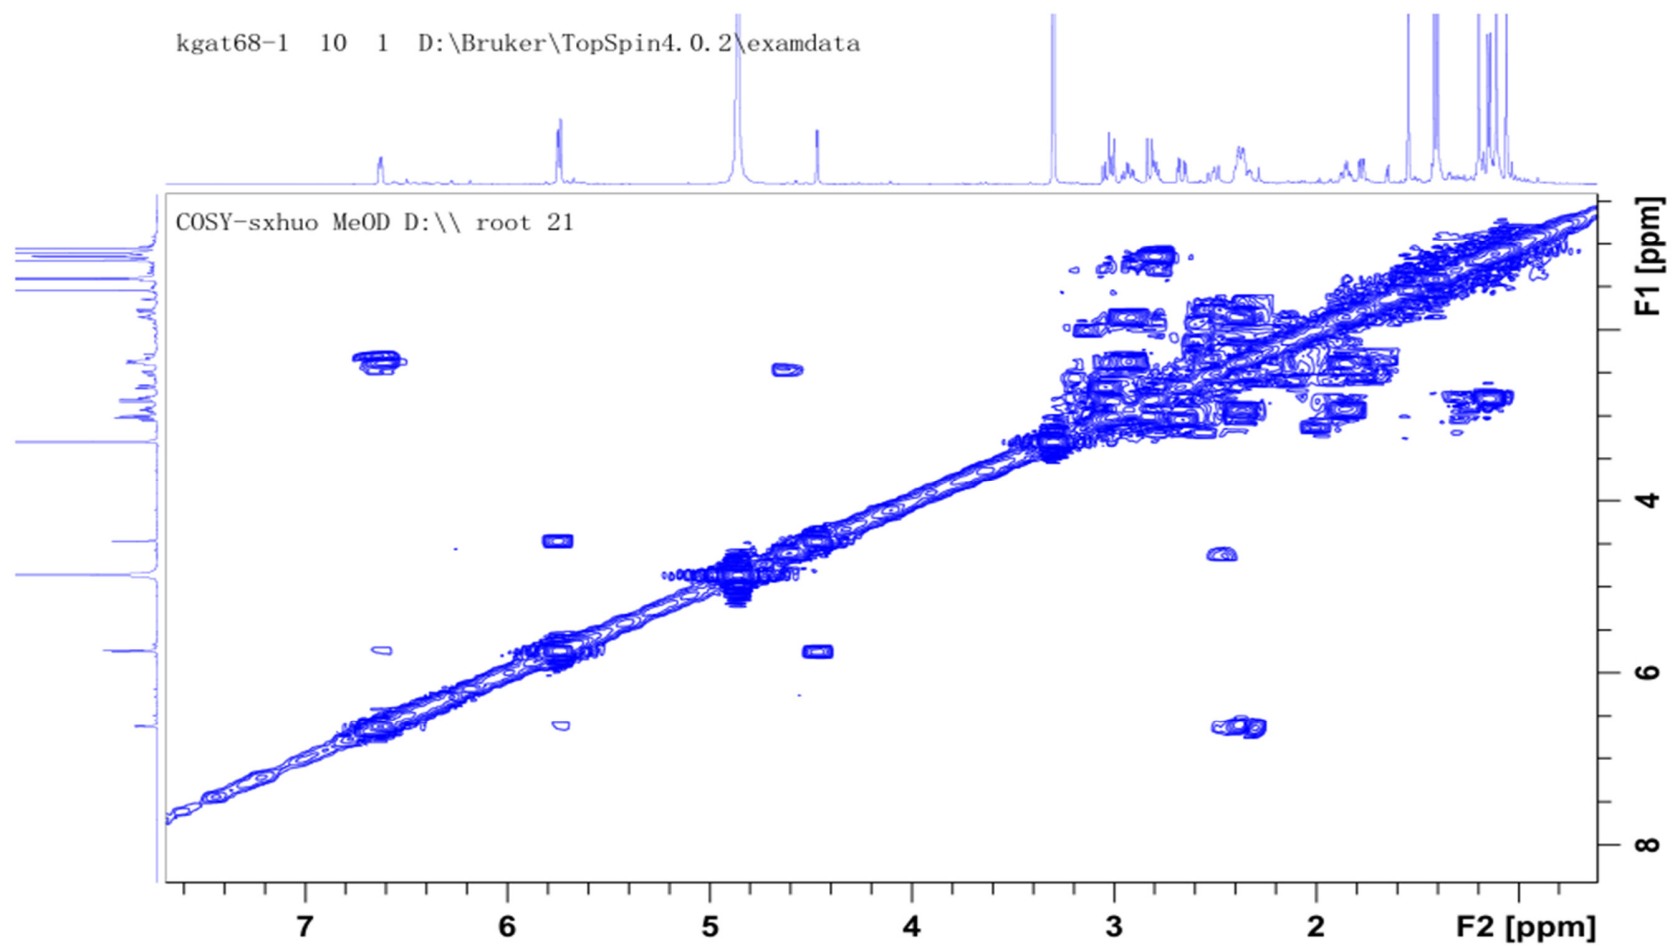

Figure S70. HSQC (600/150 MHz, MeOH-*d*<sub>4</sub>) spectrum of 10.

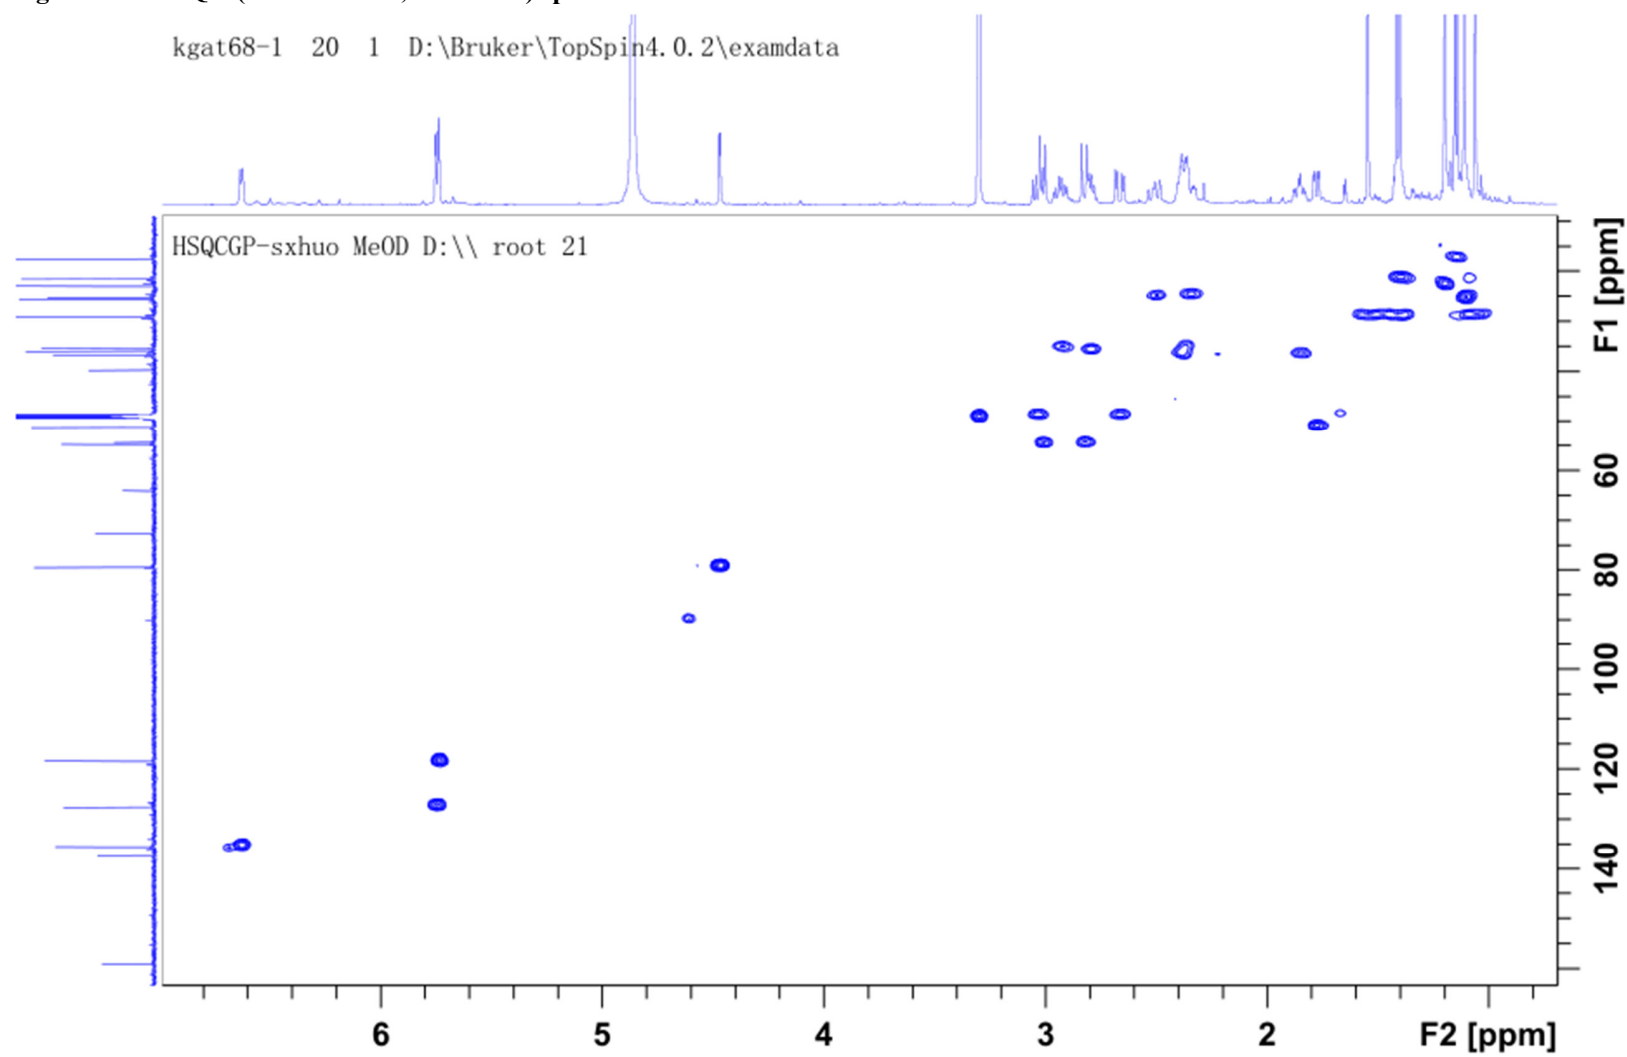

Figure S71. HMBC (600/150 MHz, MeOH-*d*<sub>4</sub>) spectrum of 10.

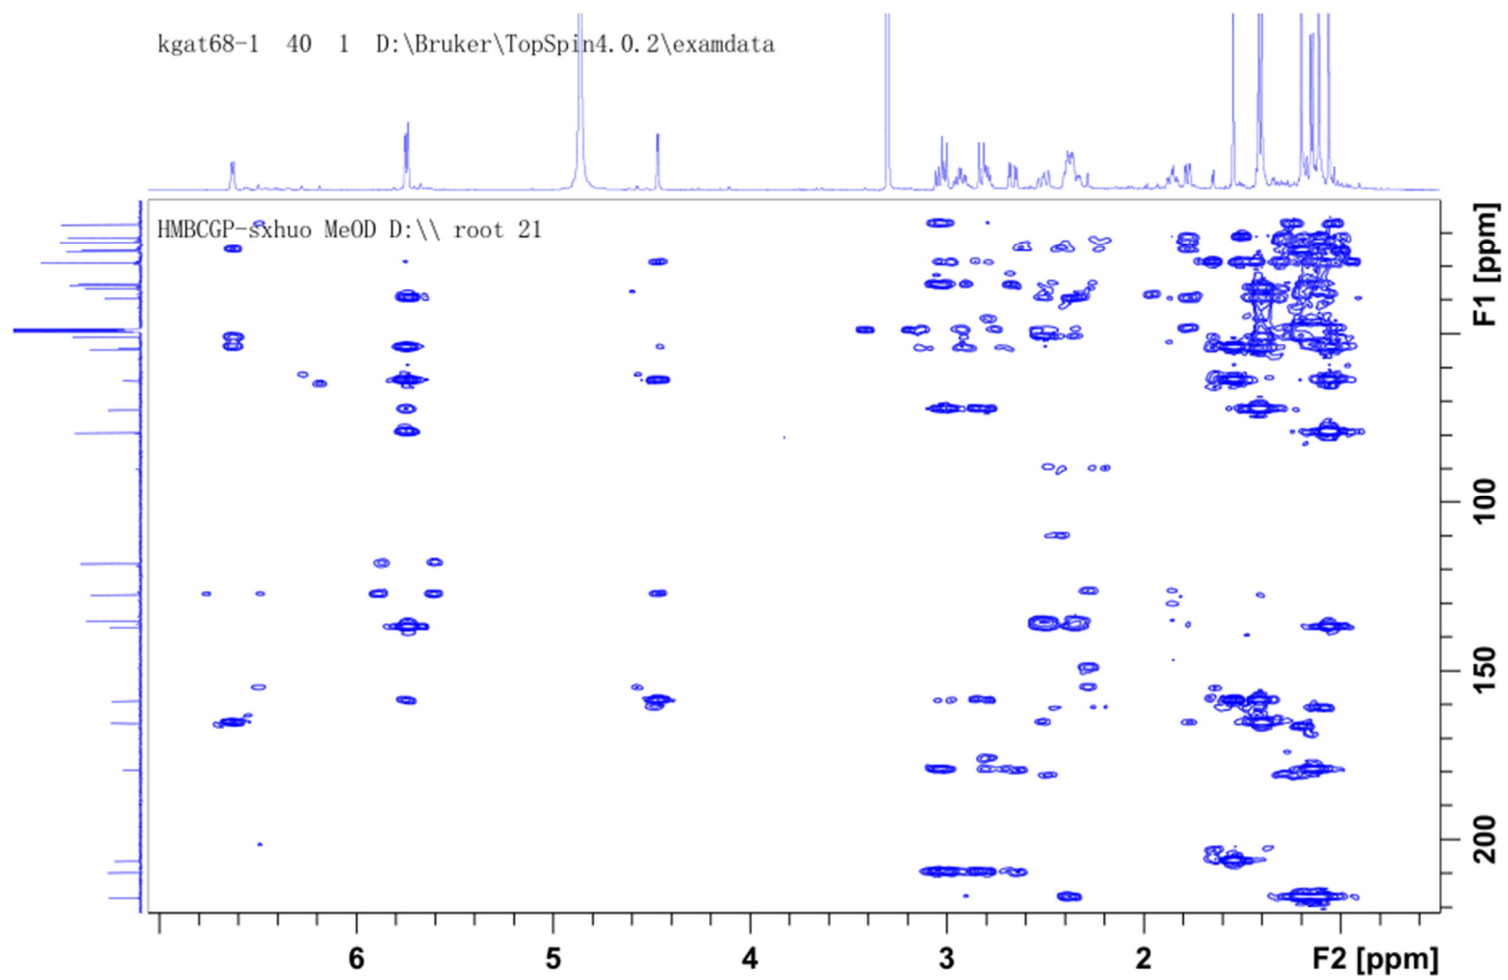

Figure S72. ROESY (600/150 MHz, MeOH-*d*<sub>4</sub>) spectrum of 10.

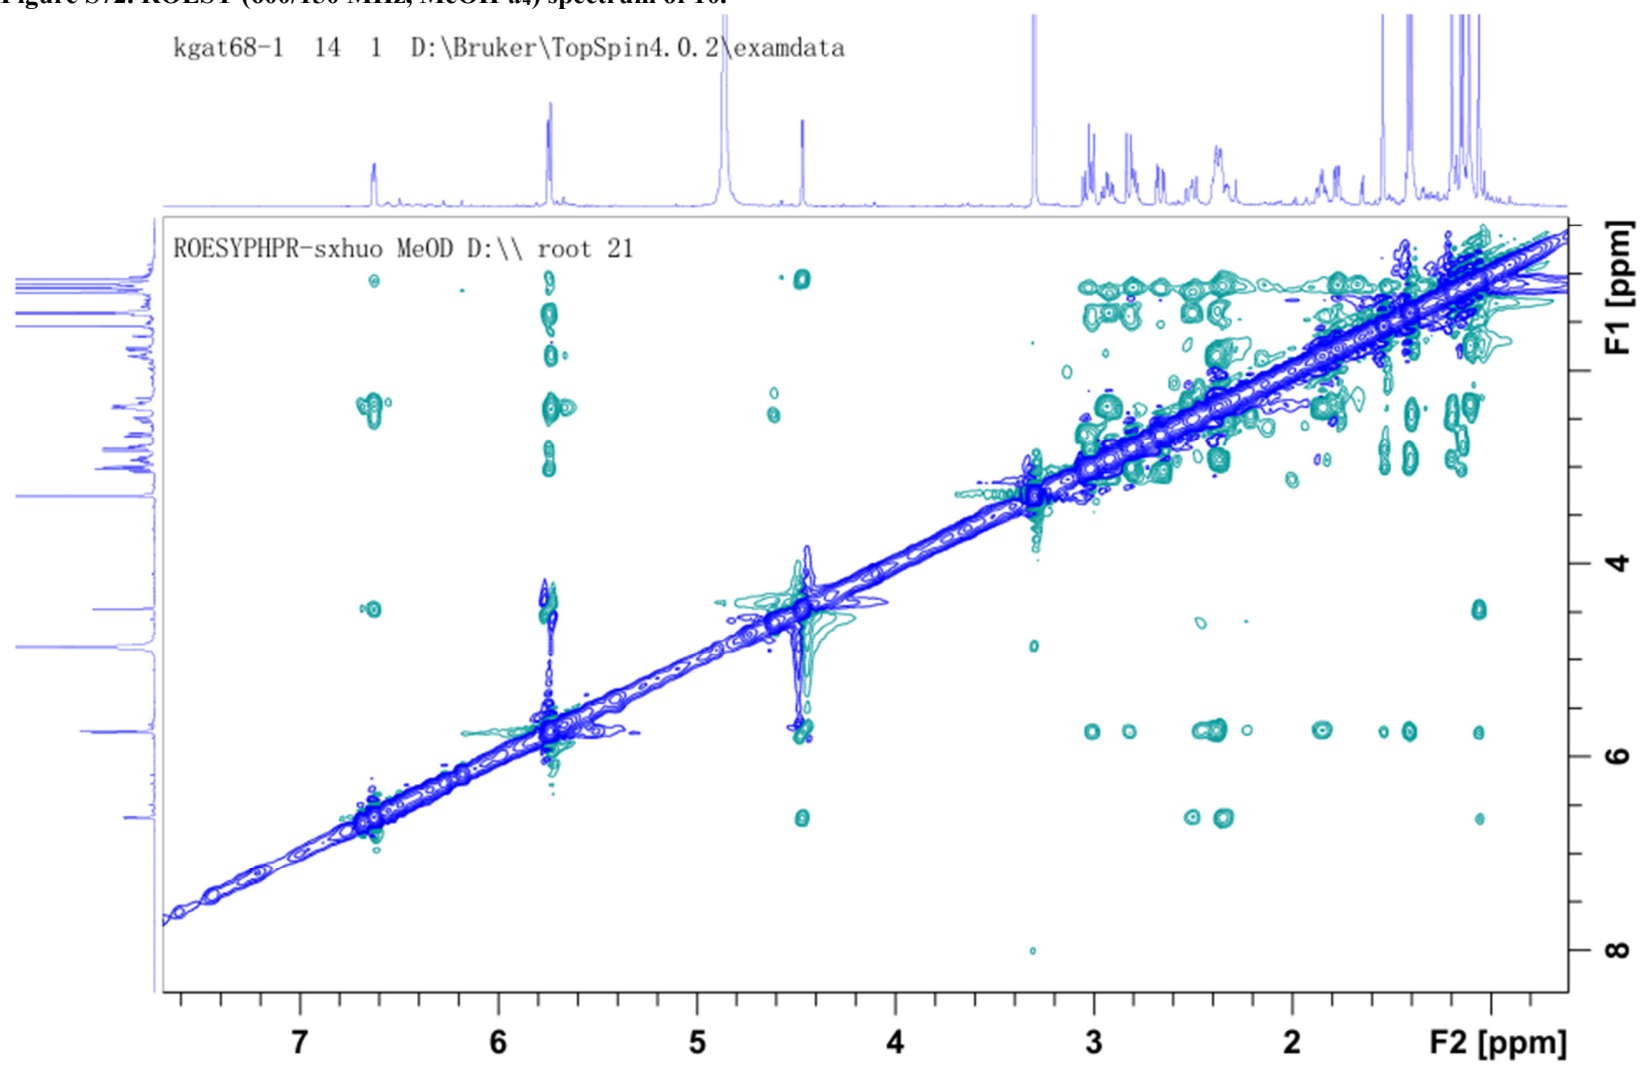

## Section S22: HRESIMS spectrum of 10

Figure S73. HRESIMS spectrum of 10.

### Qualitative Analysis Report

|                               |              |                      |                     |
|-------------------------------|--------------|----------------------|---------------------|
| <b>Data Filename</b>          | kgat68-1.d   | <b>Sample Name</b>   | kgat68-1            |
| <b>Sample Type</b>            | Sample       | <b>Position</b>      | P1-A6               |
| <b>Instrument Name</b>        | Instrument 1 | <b>User Name</b>     |                     |
| <b>Acq Method</b>             | s-.m         | <b>Acquired Time</b> | 7/9/2021 3:17:33 PM |
| <b>IRM Calibration Status</b> | Success      | <b>DA Method</b>     | Default.m           |
| <b>Comment</b>                |              |                      |                     |

  

|                       |                             |              |
|-----------------------|-----------------------------|--------------|
| <b>Sample Group</b>   |                             | <b>Info.</b> |
| <b>Acquisition SW</b> | 6200 series TOF/6500 series |              |
| <b>Version</b>        | Q-TOF B.05.01 (B5125.2)     |              |

### User Spectra

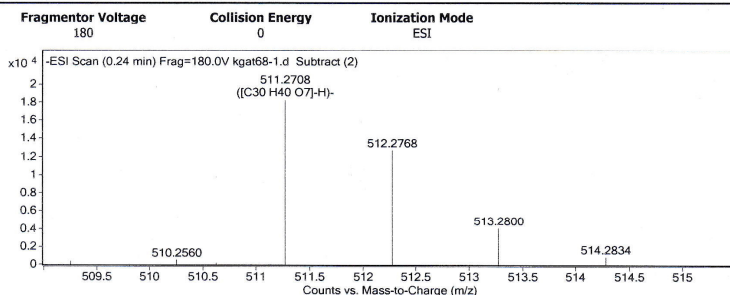

### Peak List

| m/z      | z | Abund    | Formula    | Ion    |
|----------|---|----------|------------|--------|
| 129.0554 |   | 2320     |            |        |
| 493.2601 |   | 1402.9   |            |        |
| 494.2642 | 1 | 1299.74  |            |        |
| 511.2708 |   | 18227.04 | C30 H40 O7 | (M-H)- |
| 512.2768 | 1 | 12667.26 |            |        |
| 513.28   | 1 | 4049.29  |            |        |
| 527.2673 |   | 3307.64  |            |        |
| 528.2705 | 1 | 2243.17  |            |        |
| 528.3024 | 1 | 1029.55  |            |        |
| 529.2735 | 1 | 1051.21  |            |        |
| 579.2585 | 1 | 2825.05  |            |        |
| 580.2648 | 1 | 1943.69  |            |        |

### Formula Calculator Element Limits

| Element | Min | Max |
|---------|-----|-----|
| C       | 3   | 60  |
| H       | 0   | 120 |
| O       | 0   | 30  |

### Formula Calculator Results

| Formula    | CalculatedMass | CalculatedMz | Mz       | Diff. (mDa) | Diff. (ppm) | DBE     |
|------------|----------------|--------------|----------|-------------|-------------|---------|
| C30 H40 O7 | 512.2774       | 511.2701     | 511.2708 | -0.70       | -1.37       | 11.0000 |

--- End Of Report ---

Section S23: 1D and 2D NMR spectra of compound 11

Figure S74.  $^1\text{H}$  NMR (600 MHz,  $\text{MeOH-}d_4$ ) spectrum of 11.

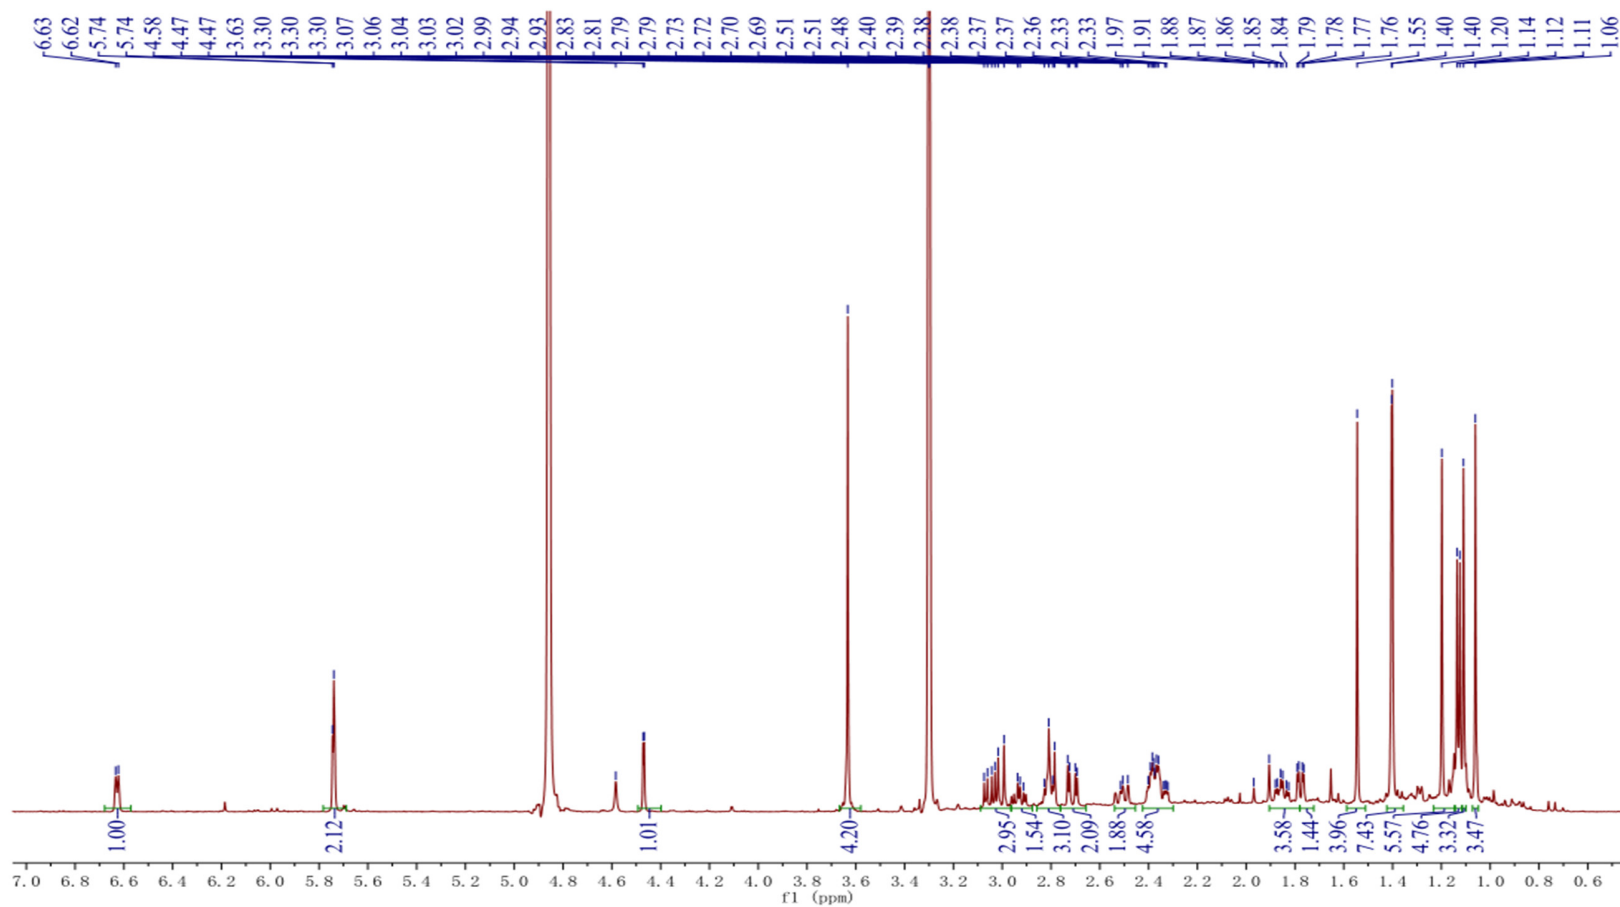

Figure S75.  $^{13}\text{C}$  NMR (150 MHz,  $\text{MeOH-}d_4$ ) spectrum of 11.

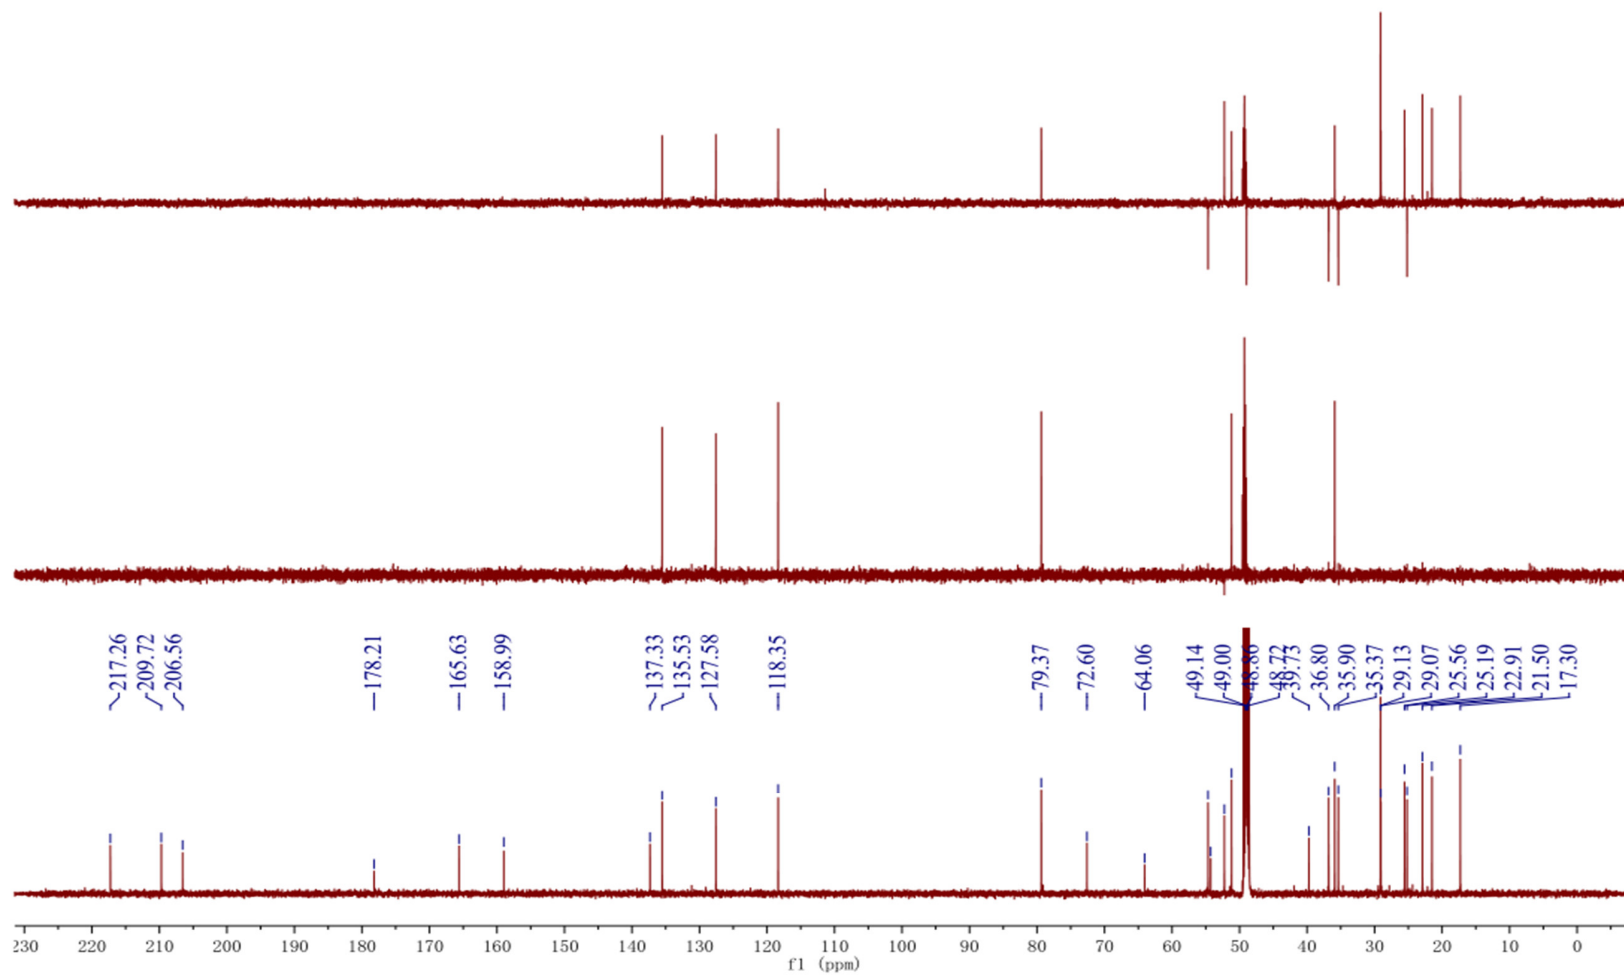



Figure S76.  $^1\text{H}$ - $^1\text{H}$  COSY (600 MHz,  $\text{MeOH-}d_4$ ) spectrum of 11.

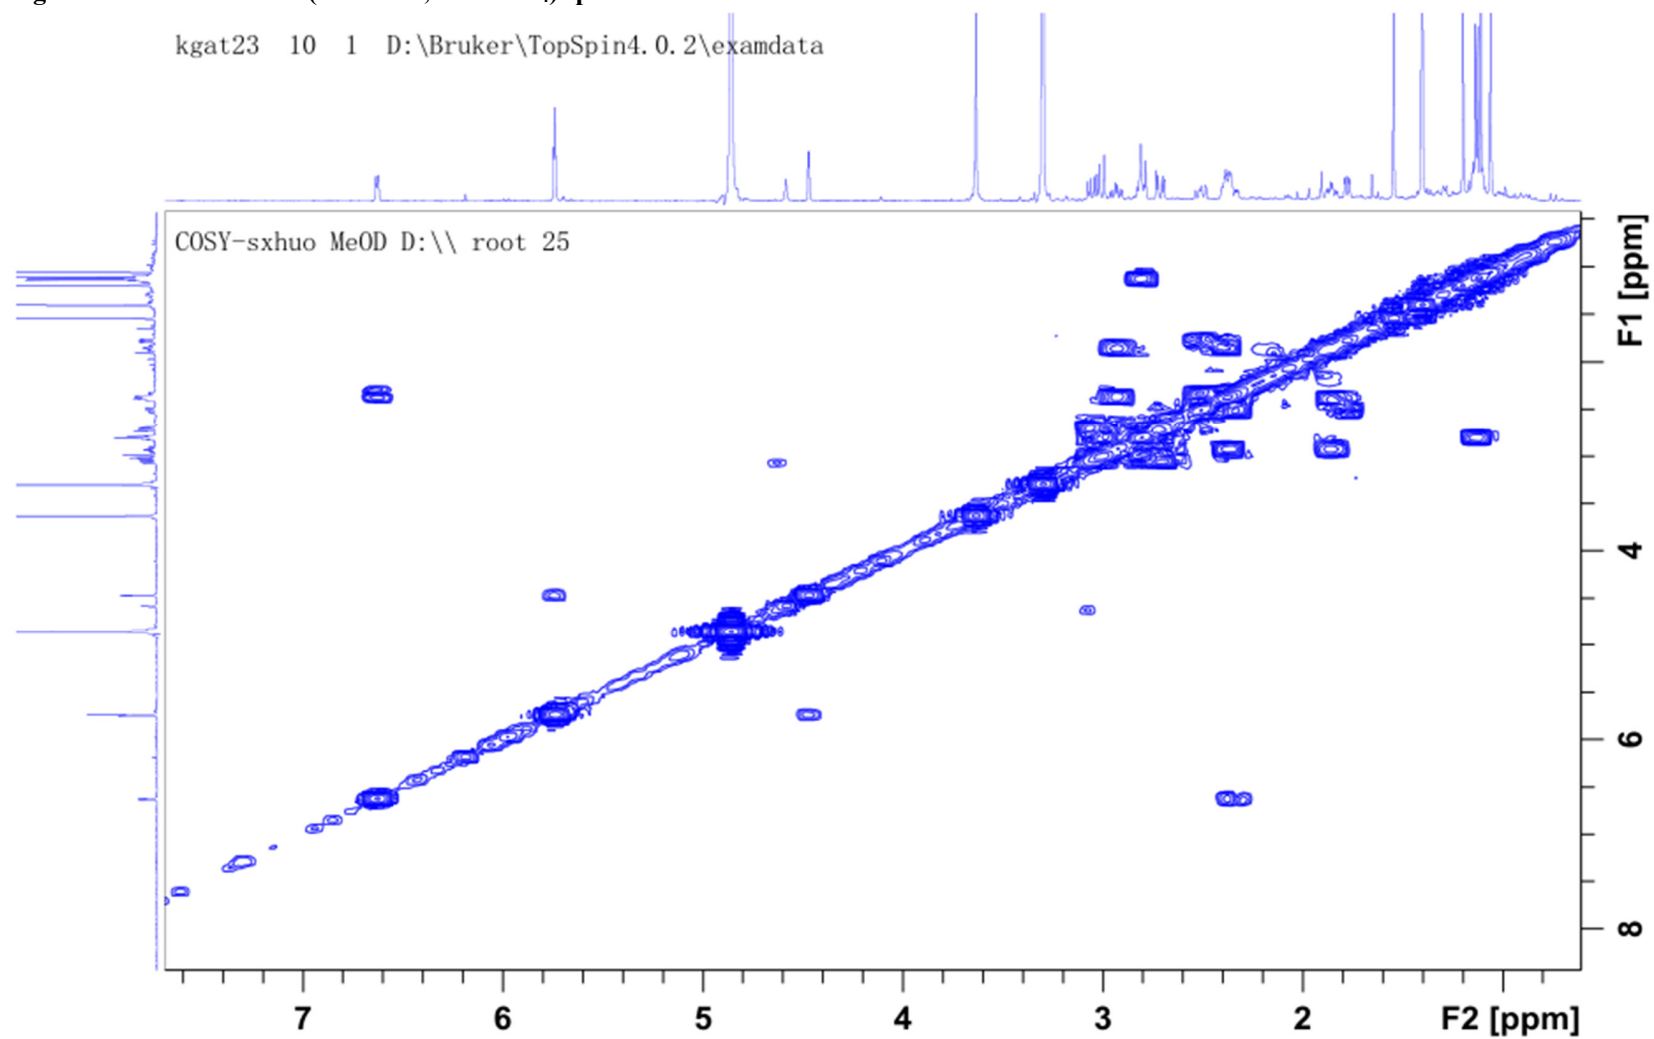

Figure S77. HSQC (600/150 MHz, MeOH-*d*<sub>4</sub>) spectrum of 11.

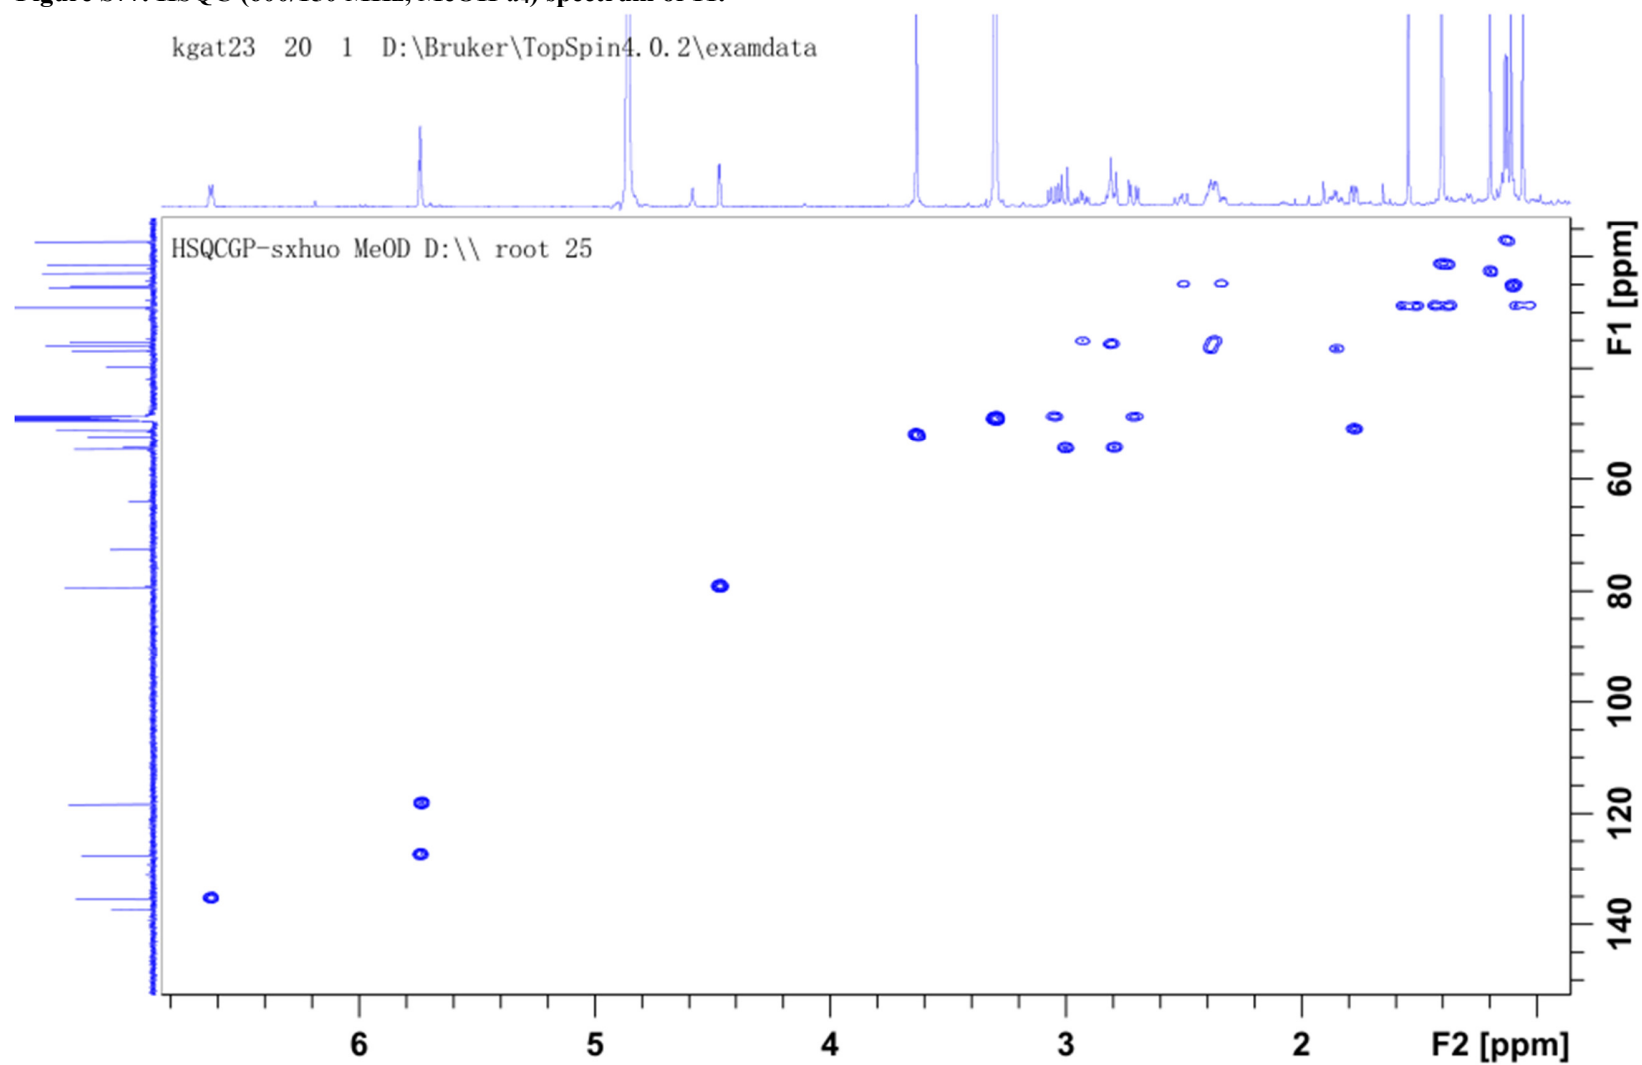

Figure S78. HMBC (600/150 MHz, MeOH-*d*<sub>4</sub>) spectrum of 11.

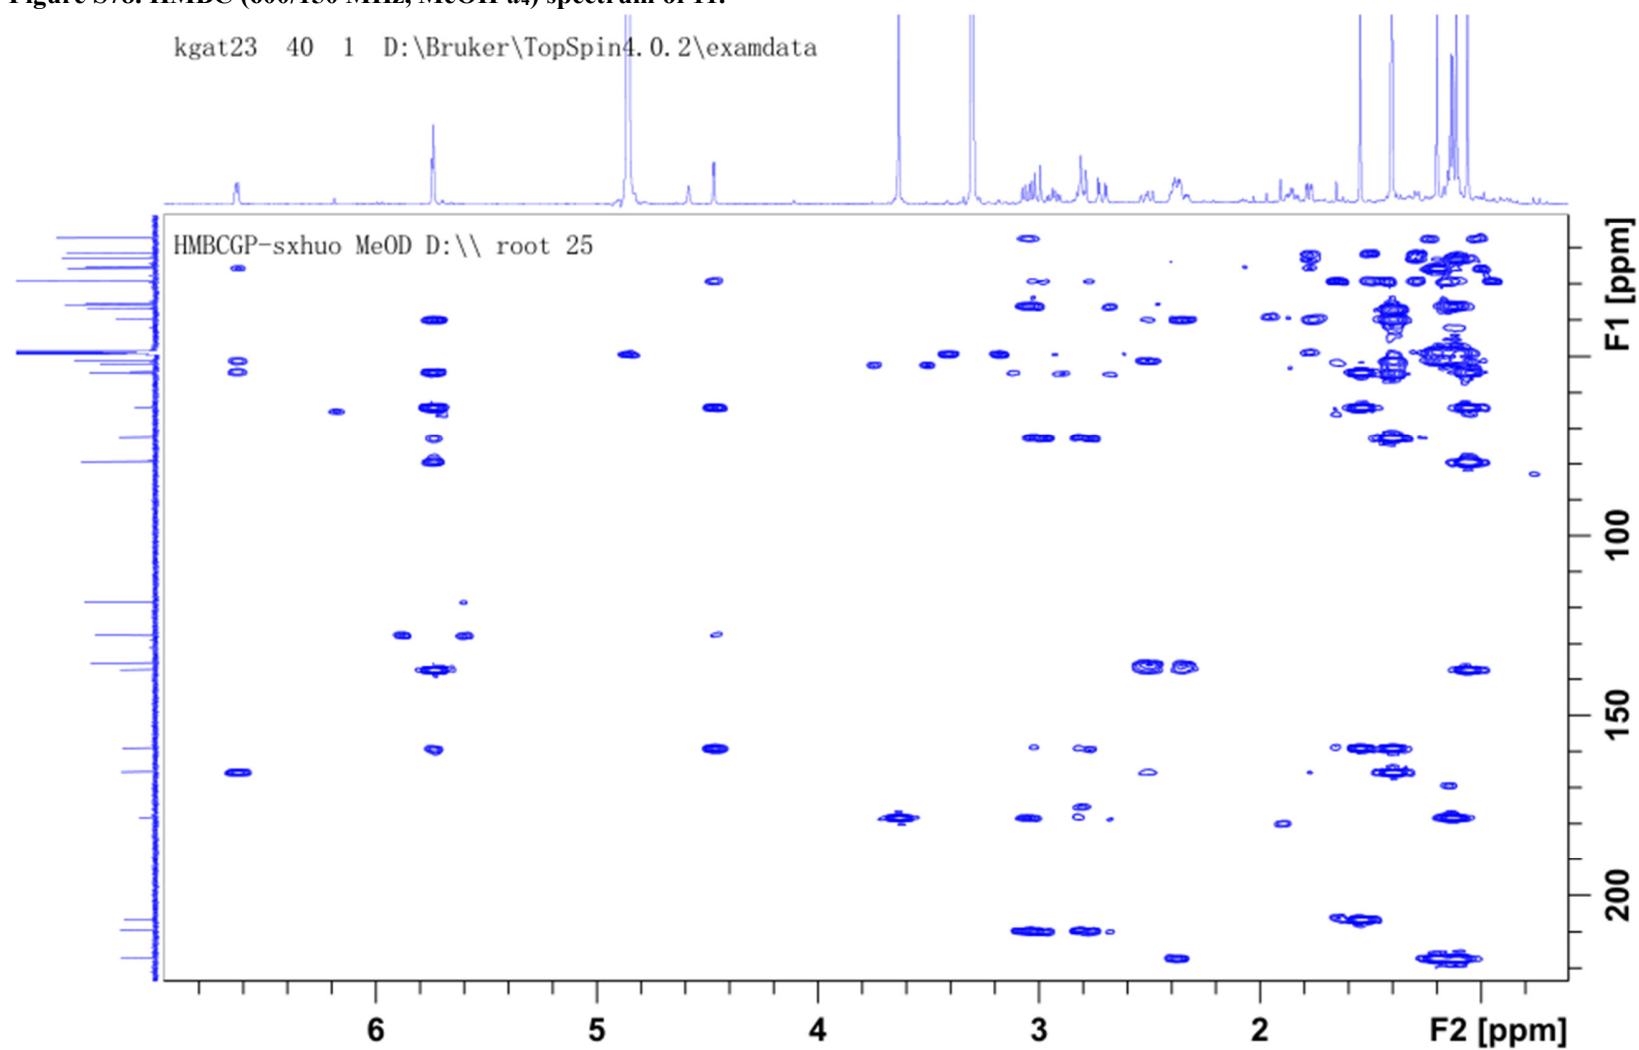

Figure S79. ROESY (600/150 MHz, MeOH-*d*<sub>4</sub>) spectrum of 11.

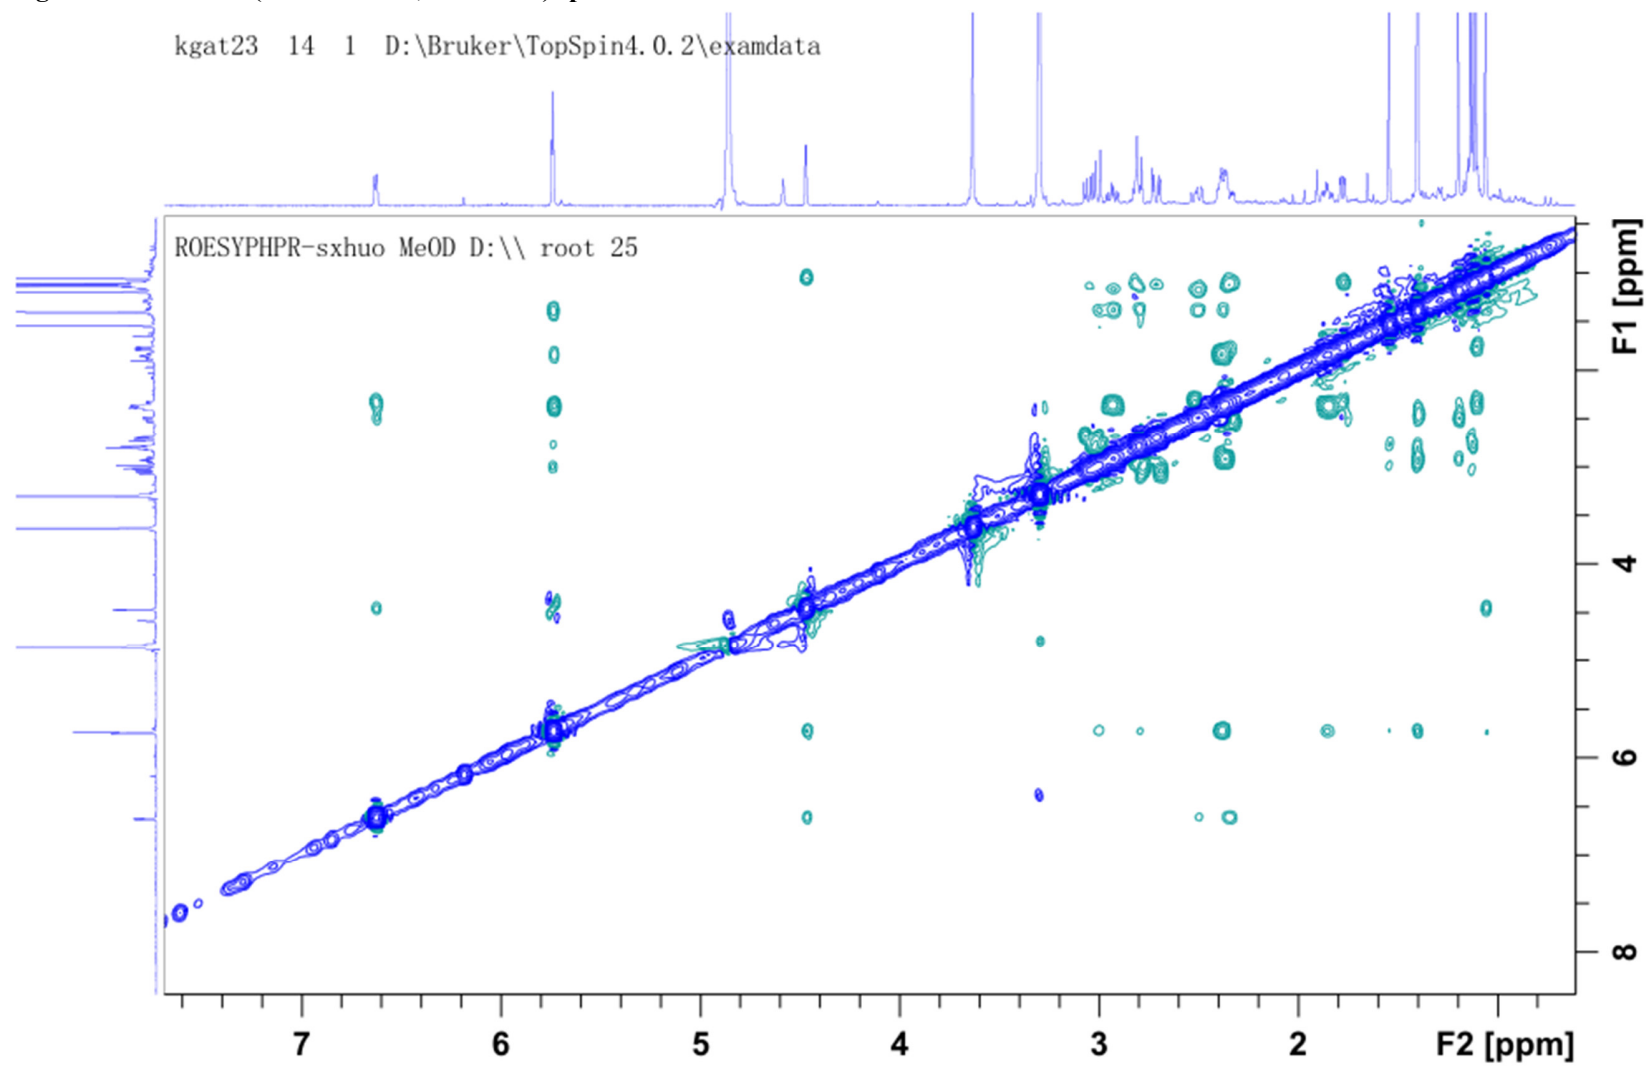

## Section S24: HRESIMS spectrum of 11

Figure S80. HRESIMS spectrum of 11.

### Qualitative Analysis Report

|                               |                             |                      |                       |
|-------------------------------|-----------------------------|----------------------|-----------------------|
| <b>Data Filename</b>          | kgat23.d                    | <b>Sample Name</b>   | kgat23                |
| <b>Sample Type</b>            | Sample                      | <b>Position</b>      | P1-B1                 |
| <b>Instrument Name</b>        | Instrument 1                | <b>User Name</b>     |                       |
| <b>Acq Method</b>             | s.m                         | <b>Acquired Time</b> | 2/25/2021 11:47:38 AM |
| <b>IRM Calibration Status</b> | Success                     | <b>DA Method</b>     | Default.m             |
| <b>Comment</b>                |                             |                      |                       |
| <b>Sample Group</b>           | Info.                       |                      |                       |
| <b>Acquisition SW</b>         | 6200 series TOF/6500 series |                      |                       |
| <b>Version</b>                | Q-TOF B.05.01 (B5125.2)     |                      |                       |

### User Spectra

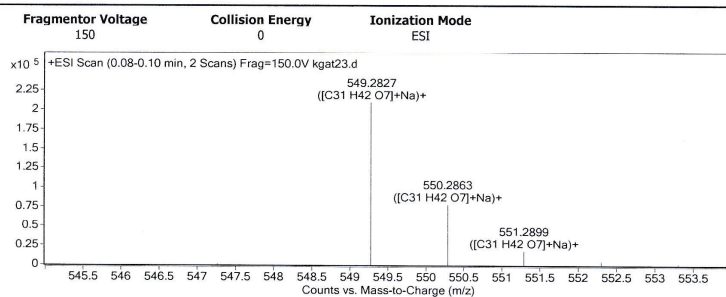

### Peak List

| m/z       | z | Abund     | Formula    | Ion     |
|-----------|---|-----------|------------|---------|
| 146.0803  | 1 | 25692.33  |            |         |
| 172.0937  | 1 | 58315.53  |            |         |
| 527.3001  | 1 | 35446.52  |            |         |
| 533.2871  | 1 | 34701.41  |            |         |
| 549.2827  | 1 | 209133.06 | C31 H42 O7 | (M+Na)+ |
| 550.2863  | 1 | 78684.9   | C31 H42 O7 | (M+Na)+ |
| 698.3877  | 1 | 23987.68  |            |         |
| 1075.577  | 1 | 124756.34 |            |         |
| 1076.5805 | 1 | 99580.17  |            |         |
| 1077.5836 | 1 | 41677.77  |            |         |

### Formula Calculator Element Limits

| Element | Min | Max |
|---------|-----|-----|
| C       | 3   | 60  |
| H       | 0   | 120 |
| O       | 0   | 30  |

### Formula Calculator Results

| Formula    | CalculatedMass | CalculatedMz | Mz       | Diff. (mDa) | Diff. (ppm) | DBE     |
|------------|----------------|--------------|----------|-------------|-------------|---------|
| C31 H42 O7 | 526.2931       | 549.2823     | 549.2827 | -0.40       | -0.73       | 11.0000 |

--- End Of Report ---

# Section S25: 1D and 2D NMR spectra of compound 12

Figure S81.  $^1\text{H}$  NMR (600 MHz,  $\text{MeOH-}d_4$ ) spectrum of 12.

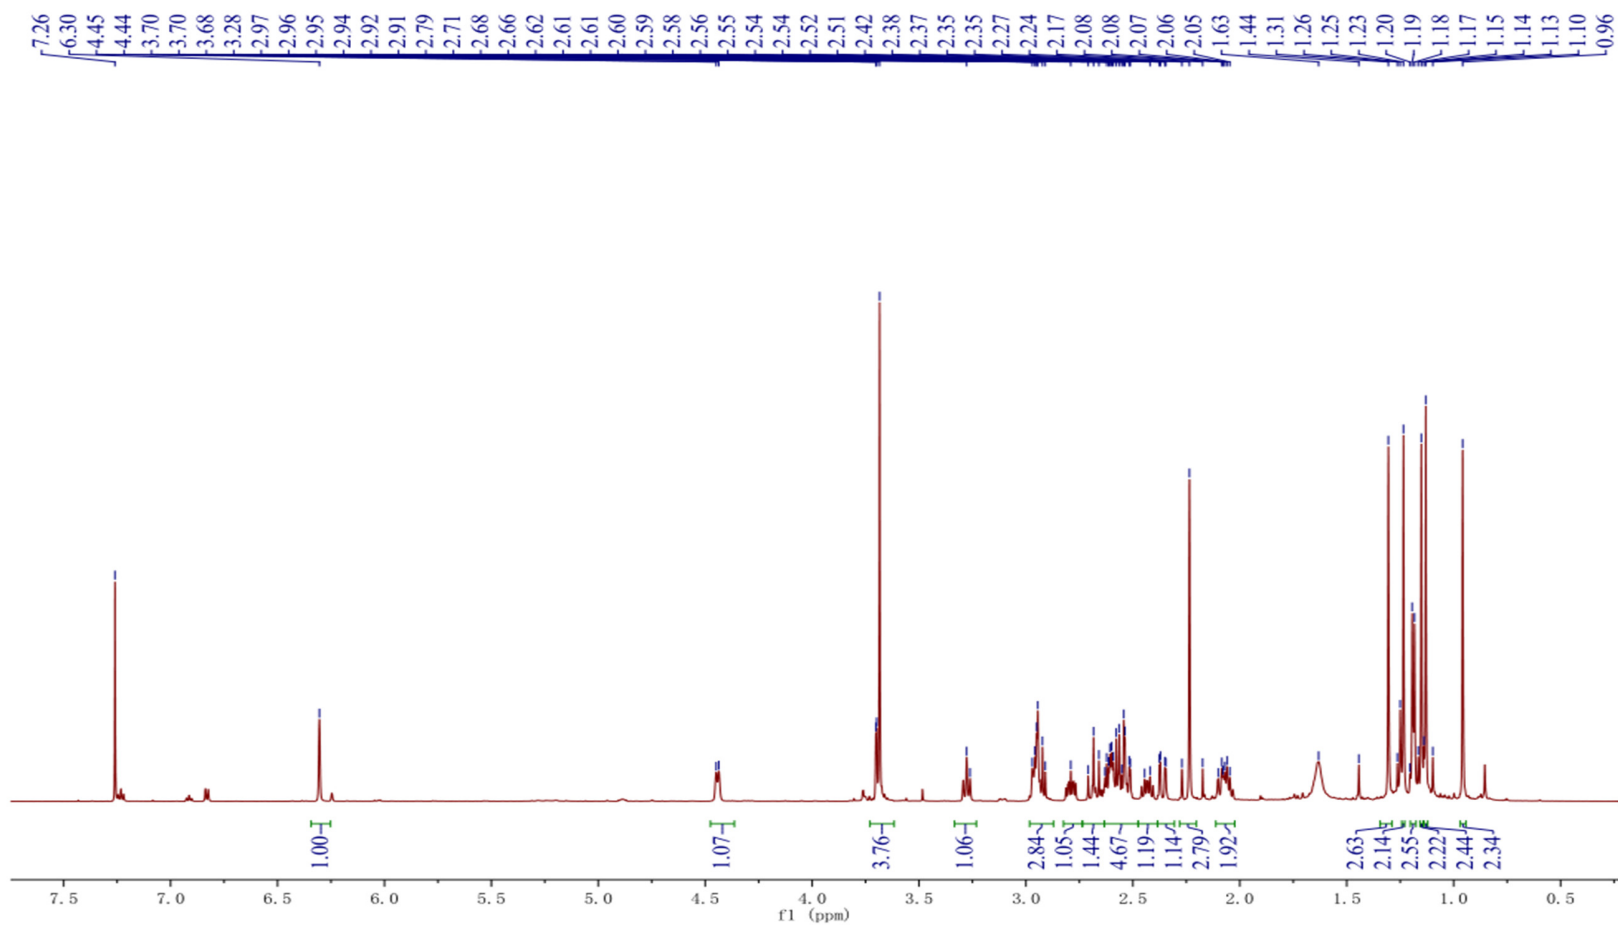

Figure S82.  $^{13}\text{C}$  NMR (150 MHz,  $\text{MeOH-}d_4$ ) spectrum of 12.

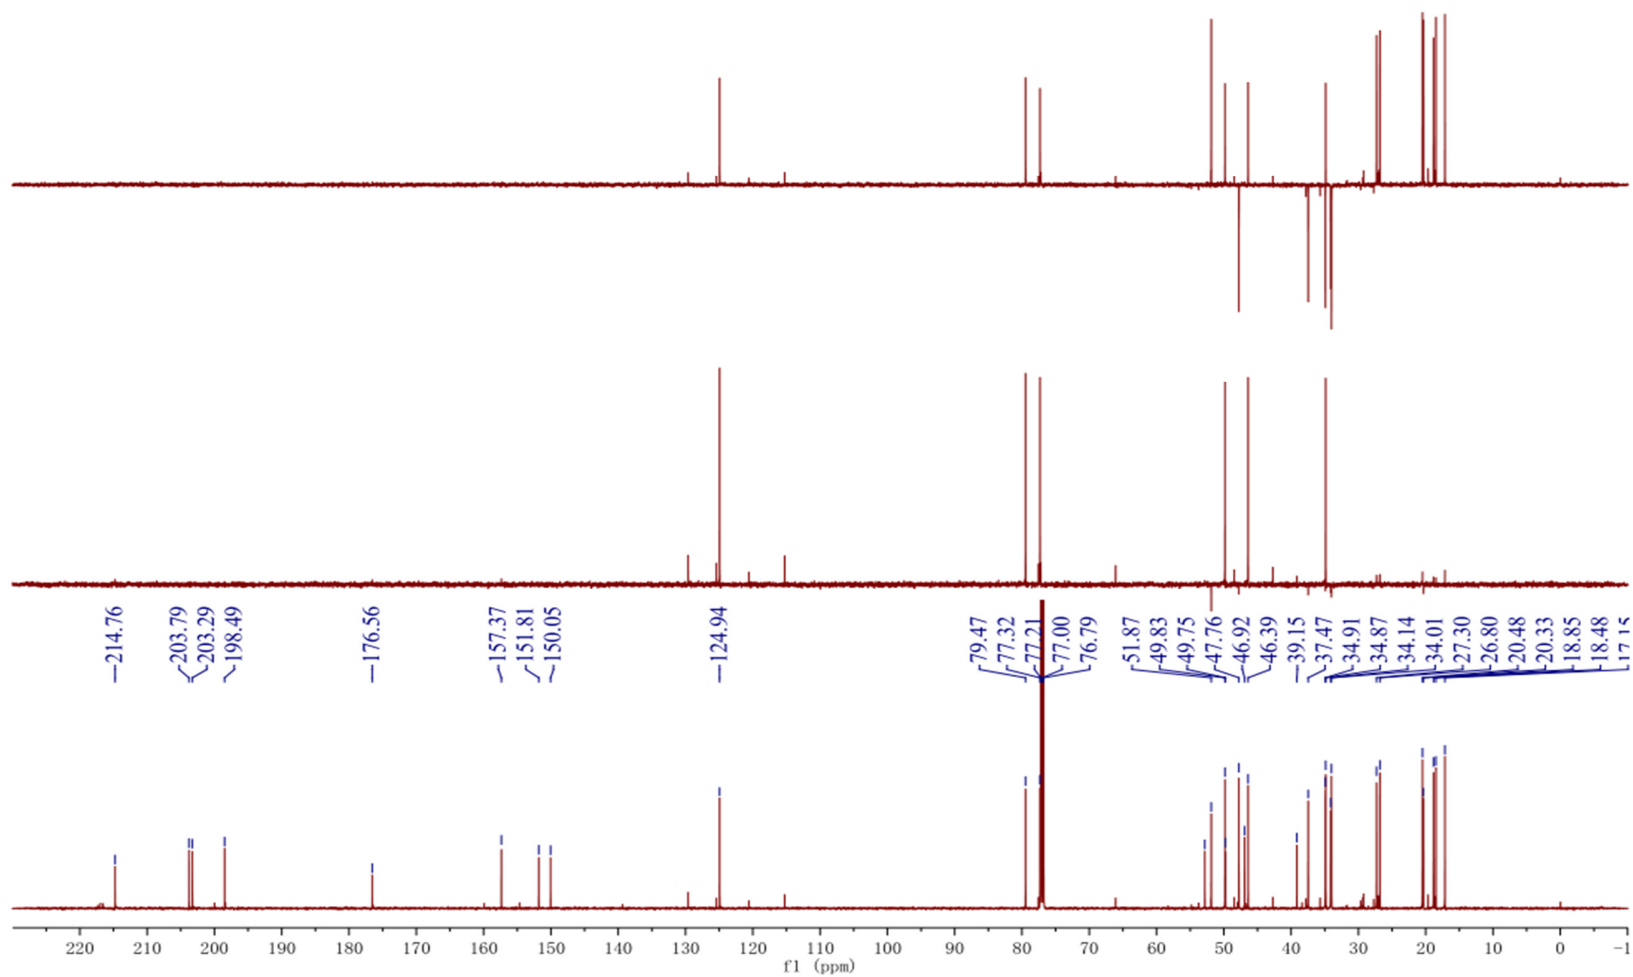

Figure S83.  $^1\text{H}$ - $^1\text{H}$  COSY (600 MHz,  $\text{MeOH-}d_4$ ) spectrum of 12.

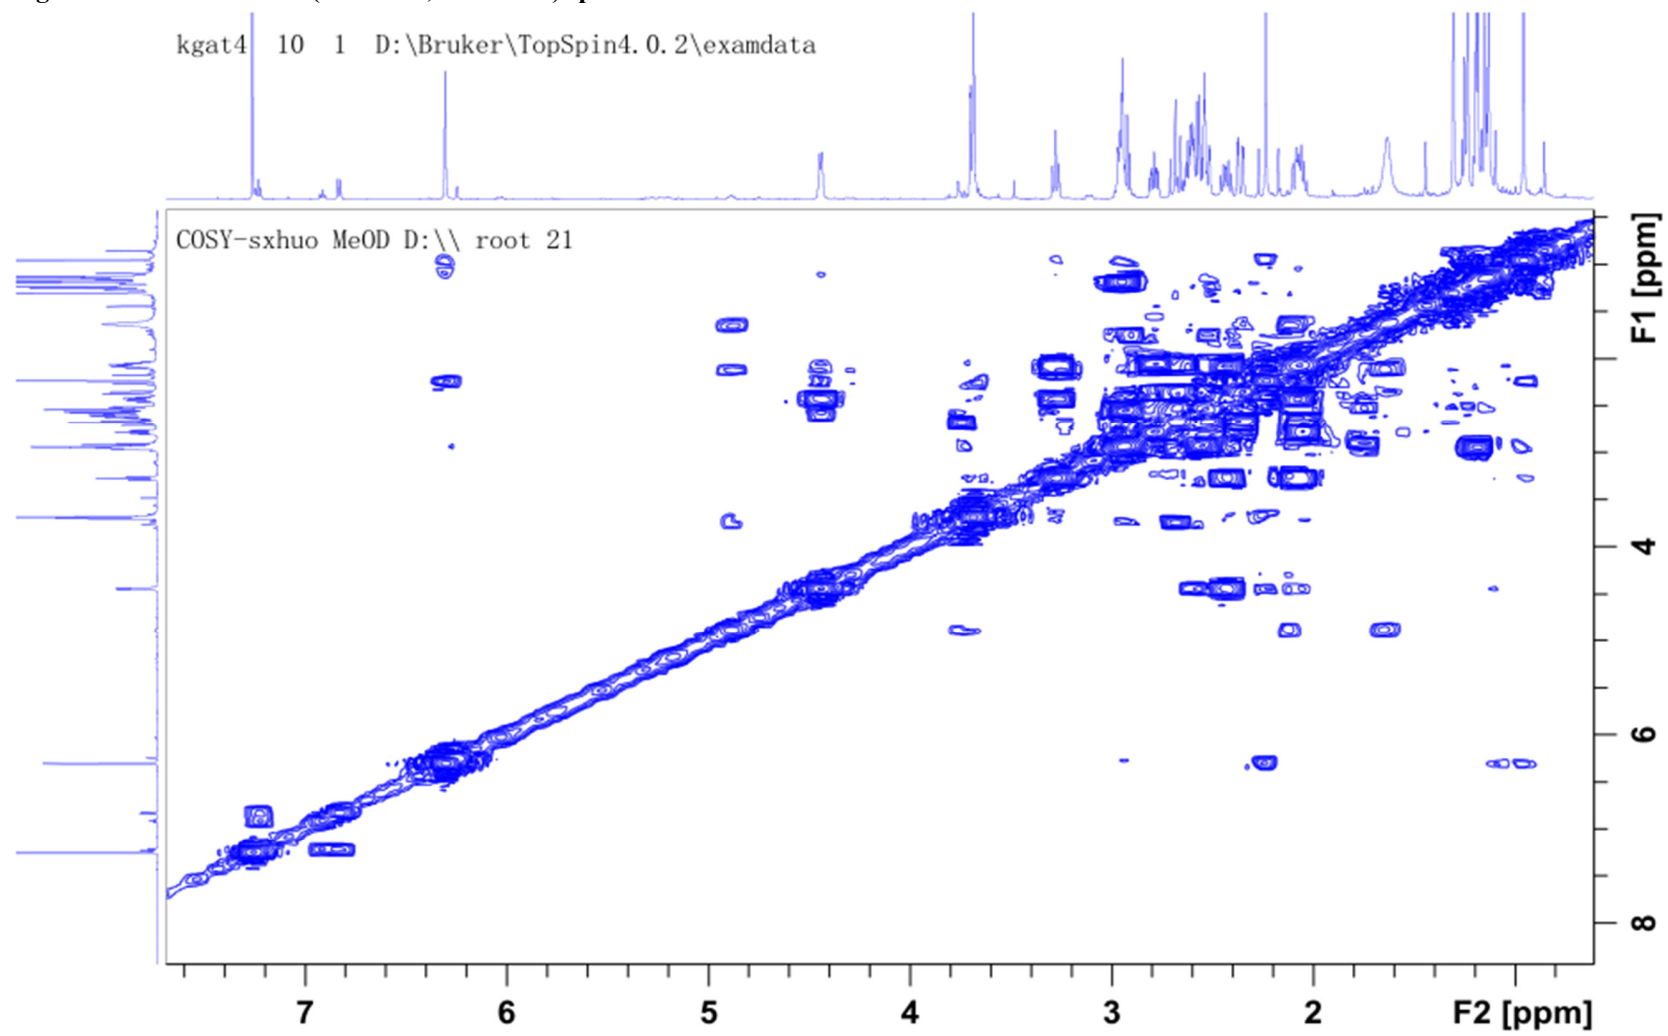



Figure S84. HSQC (600/150 MHz, MeOH-*d*<sub>4</sub>) spectrum of 12.

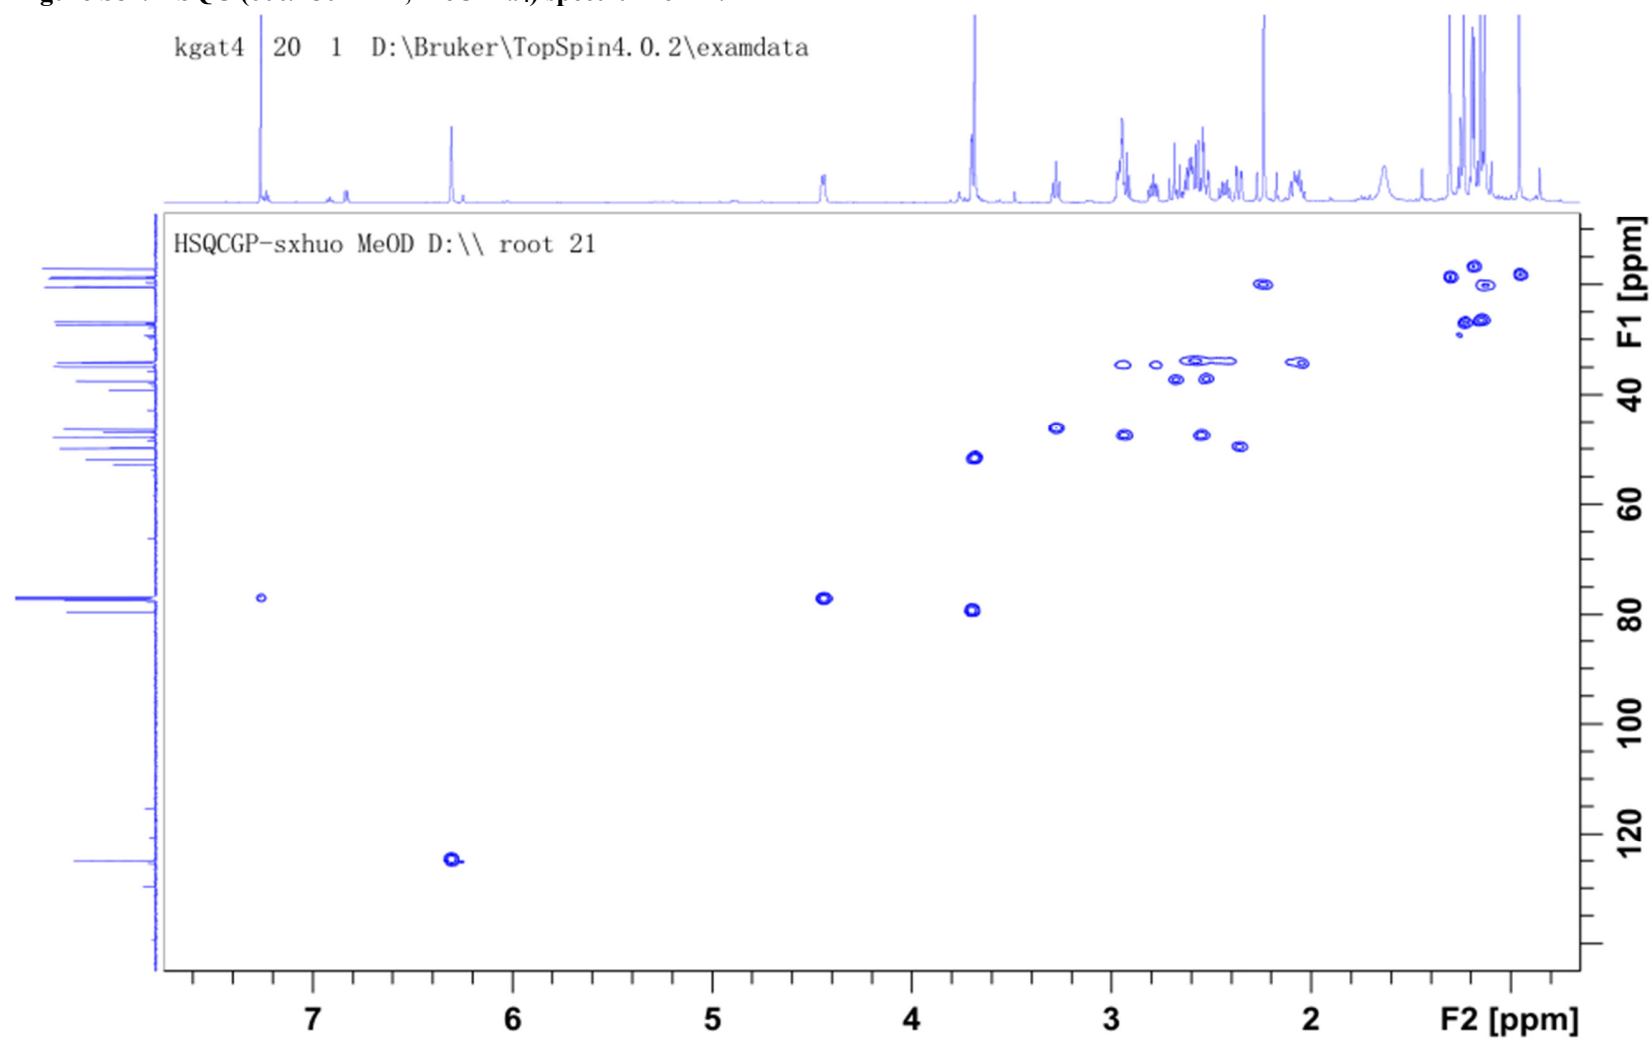

Figure S85. HMBC (600/150 MHz, MeOH-*d*<sub>4</sub>) spectrum of 12.

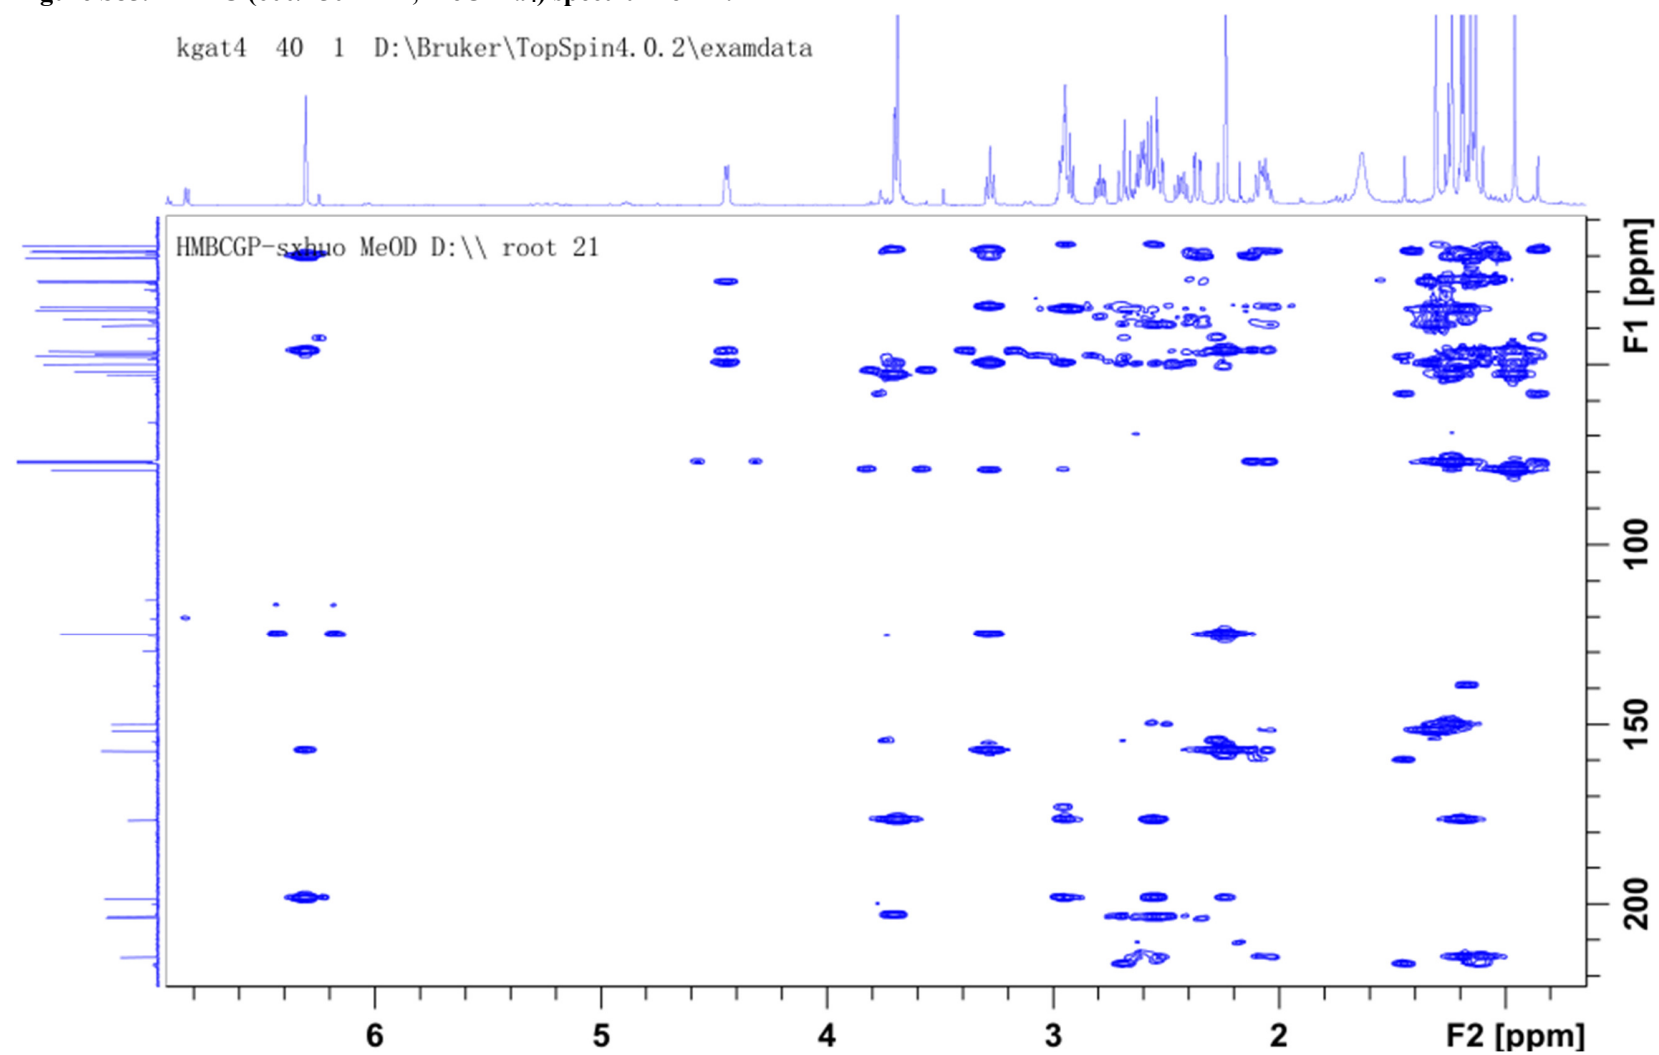

Figure S86. ROESY (600/150 MHz, MeOH-*d*<sub>4</sub>) spectrum of 12.

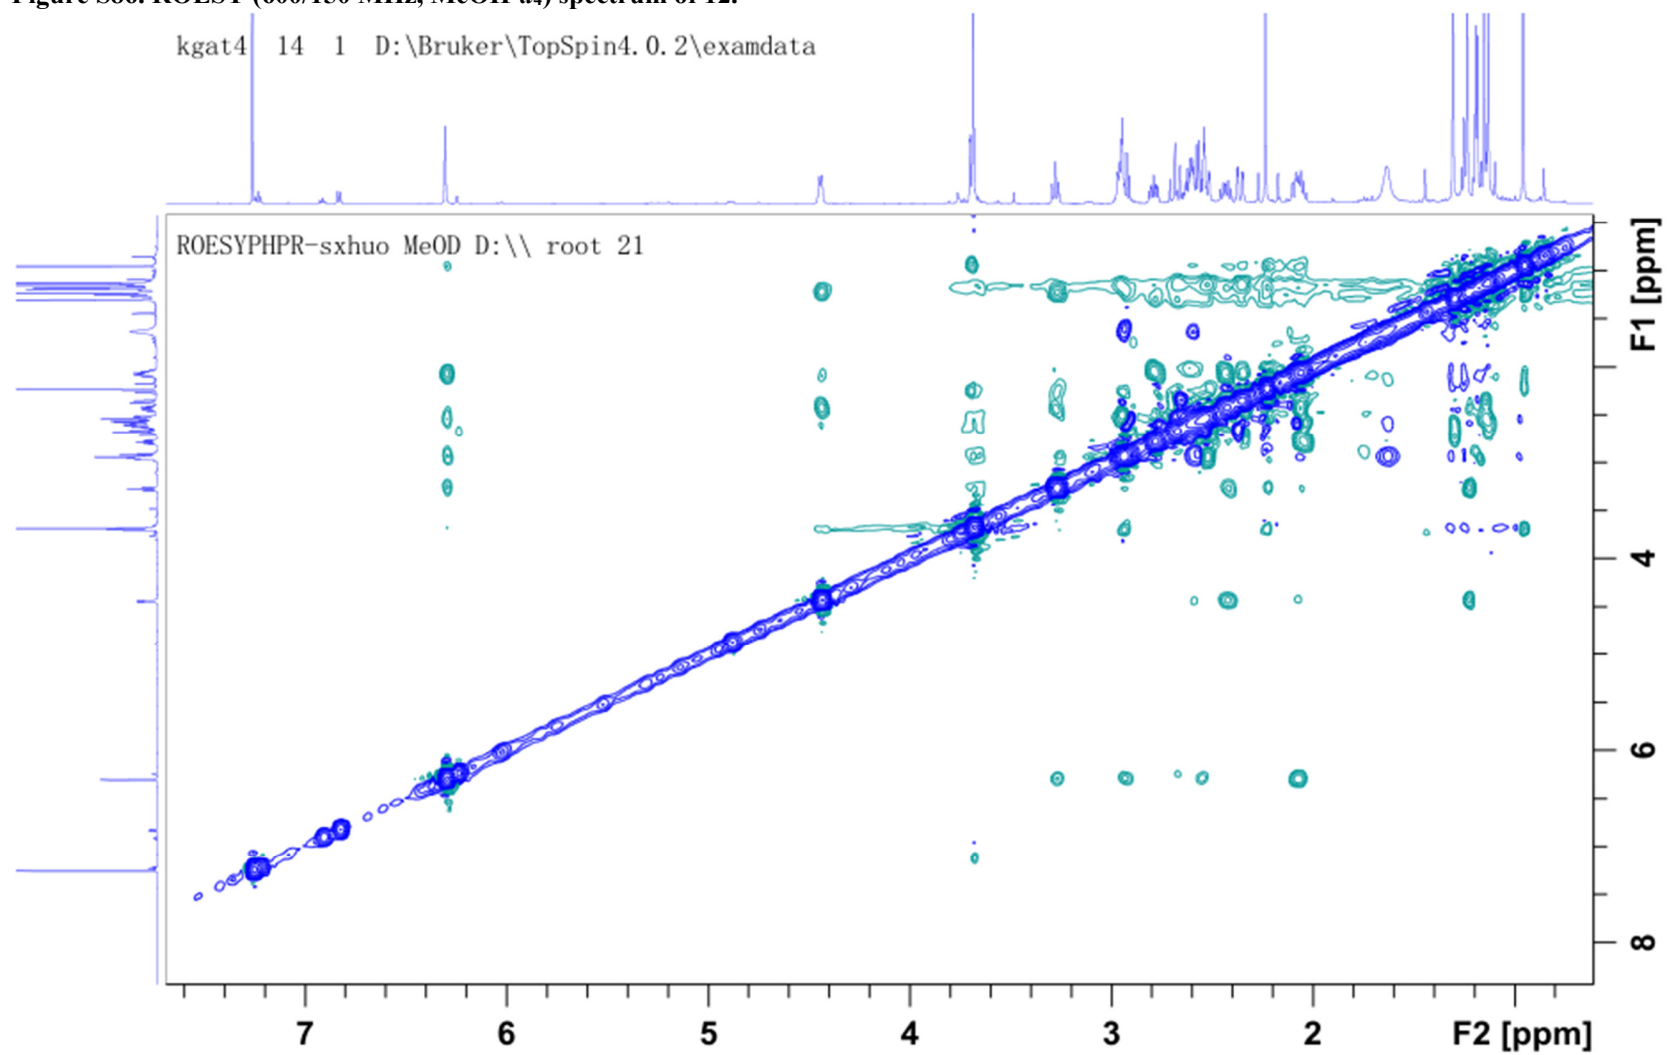

Section S26: HRESIMS spectrum of 12  
Figure S87. HRESIMS spectrum of 12.

### Qualitative Analysis Report

|                               |              |                      |                       |
|-------------------------------|--------------|----------------------|-----------------------|
| <b>Data Filename</b>          | kgat4.d      | <b>Sample Name</b>   | kgat4                 |
| <b>Sample Type</b>            | Sample       | <b>Position</b>      | P1-A4                 |
| <b>Instrument Name</b>        | Instrument 1 | <b>User Name</b>     |                       |
| <b>Acq Method</b>             | s.m          | <b>Acquired Time</b> | 2/25/2021 11:40:32 AM |
| <b>IRM Calibration Status</b> | Success      | <b>DA Method</b>     | Default.m             |
| <b>Comment</b>                |              |                      |                       |

  

|                       |                             |              |  |
|-----------------------|-----------------------------|--------------|--|
| <b>Sample Group</b>   |                             | <b>Info.</b> |  |
| <b>Acquisition SW</b> | 6200 series TOF/6500 series |              |  |
| <b>Version</b>        | Q-TOF B.05.01 (B5125.2)     |              |  |

#### User Spectra

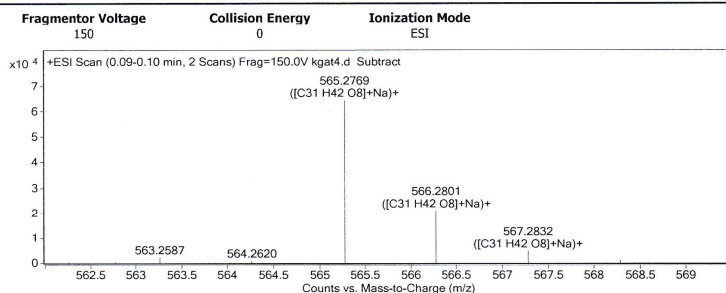

#### Peak List

| m/z       | z | Abund    | Formula    | Ion     |
|-----------|---|----------|------------|---------|
| 102.1274  | 1 | 16389.11 |            |         |
| 533.2869  | 1 | 4995.39  |            |         |
| 543.2943  | 1 | 9074.71  |            |         |
| 565.2769  | 1 | 64496.13 | C31 H42 O8 | (M+Na)+ |
| 566.2801  | 1 | 20900.9  | C31 H42 O8 | (M+Na)+ |
| 581.2508  | 1 | 13391.67 |            |         |
| 582.2538  | 1 | 5103.63  |            |         |
| 1107.5652 | 1 | 44161.14 |            |         |
| 1108.5683 | 1 | 28777.86 |            |         |
| 1109.5723 | 1 | 10624.63 |            |         |

#### Formula Calculator Element Limits

| Element | Min | Max |
|---------|-----|-----|
| C       | 3   | 60  |
| H       | 0   | 120 |
| O       | 0   | 30  |

#### Formula Calculator Results

| Formula    | CalculatedMass | CalculatedMz | Mz       | Diff. (mDa) | Diff. (ppm) | DBE     |
|------------|----------------|--------------|----------|-------------|-------------|---------|
| C31 H42 O8 | 542.2880       | 565.2772     | 565.2769 | 0.30        | 0.53        | 11.0000 |

--- End Of Report ---

# Section S27: 1D and 2D NMR spectra of compound 13

Figure S88.  $^1\text{H}$  NMR (600 MHz,  $\text{MeOH-}d_4$ ) spectrum of 13.

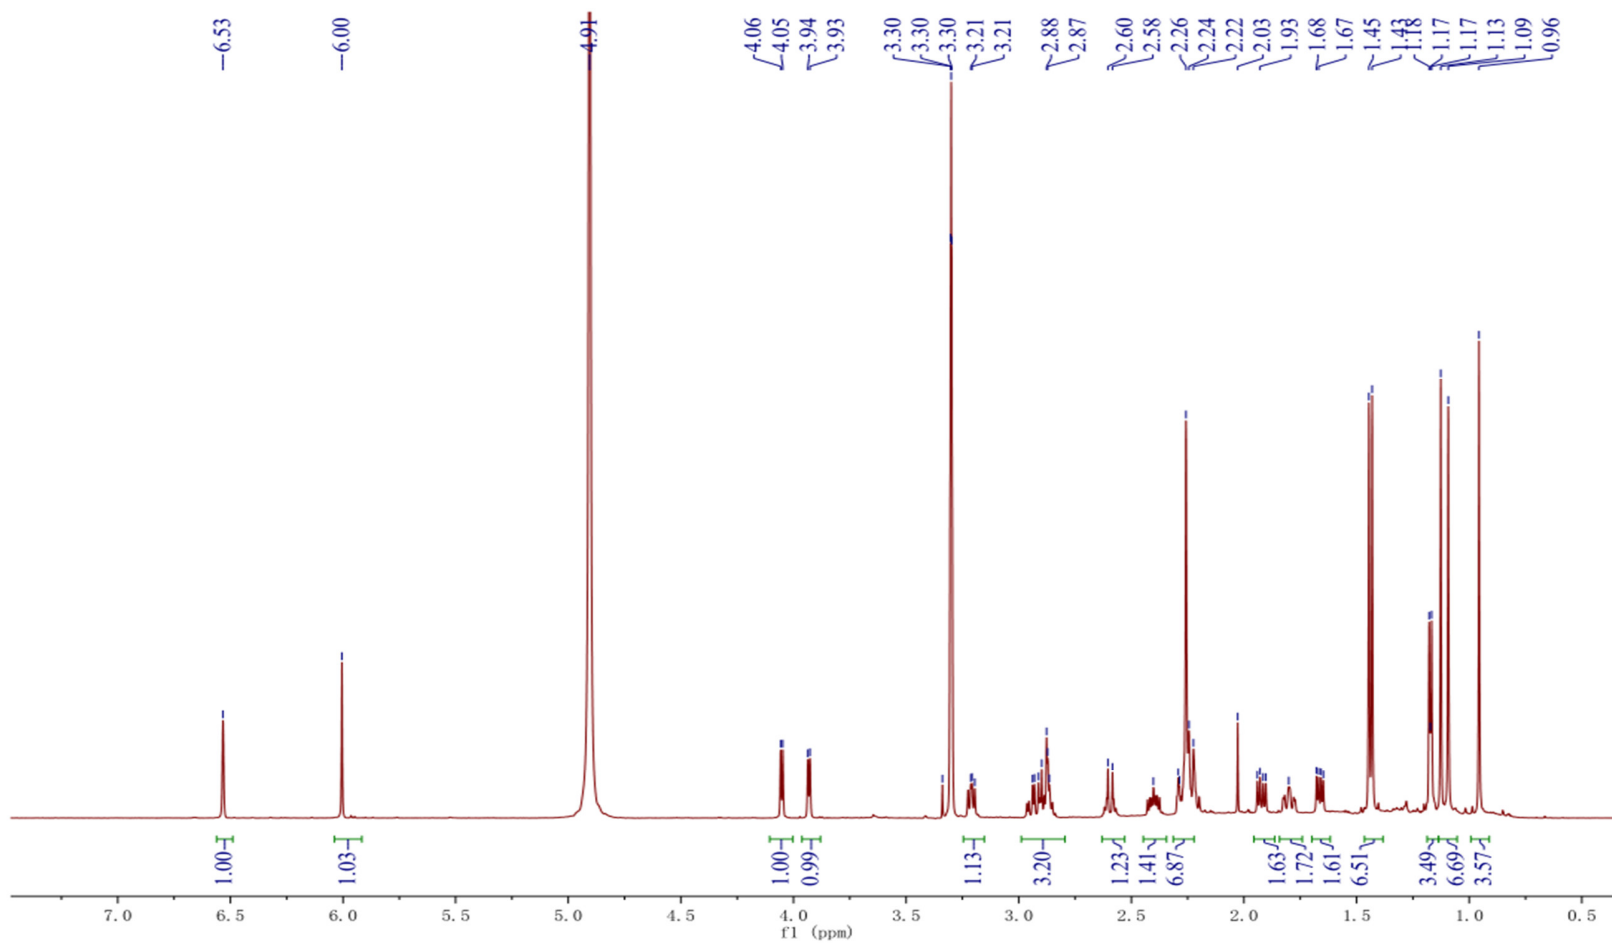

Figure S89.  $^{13}\text{C}$  NMR (150 MHz,  $\text{MeOH-}d_4$ ) spectrum of 13.

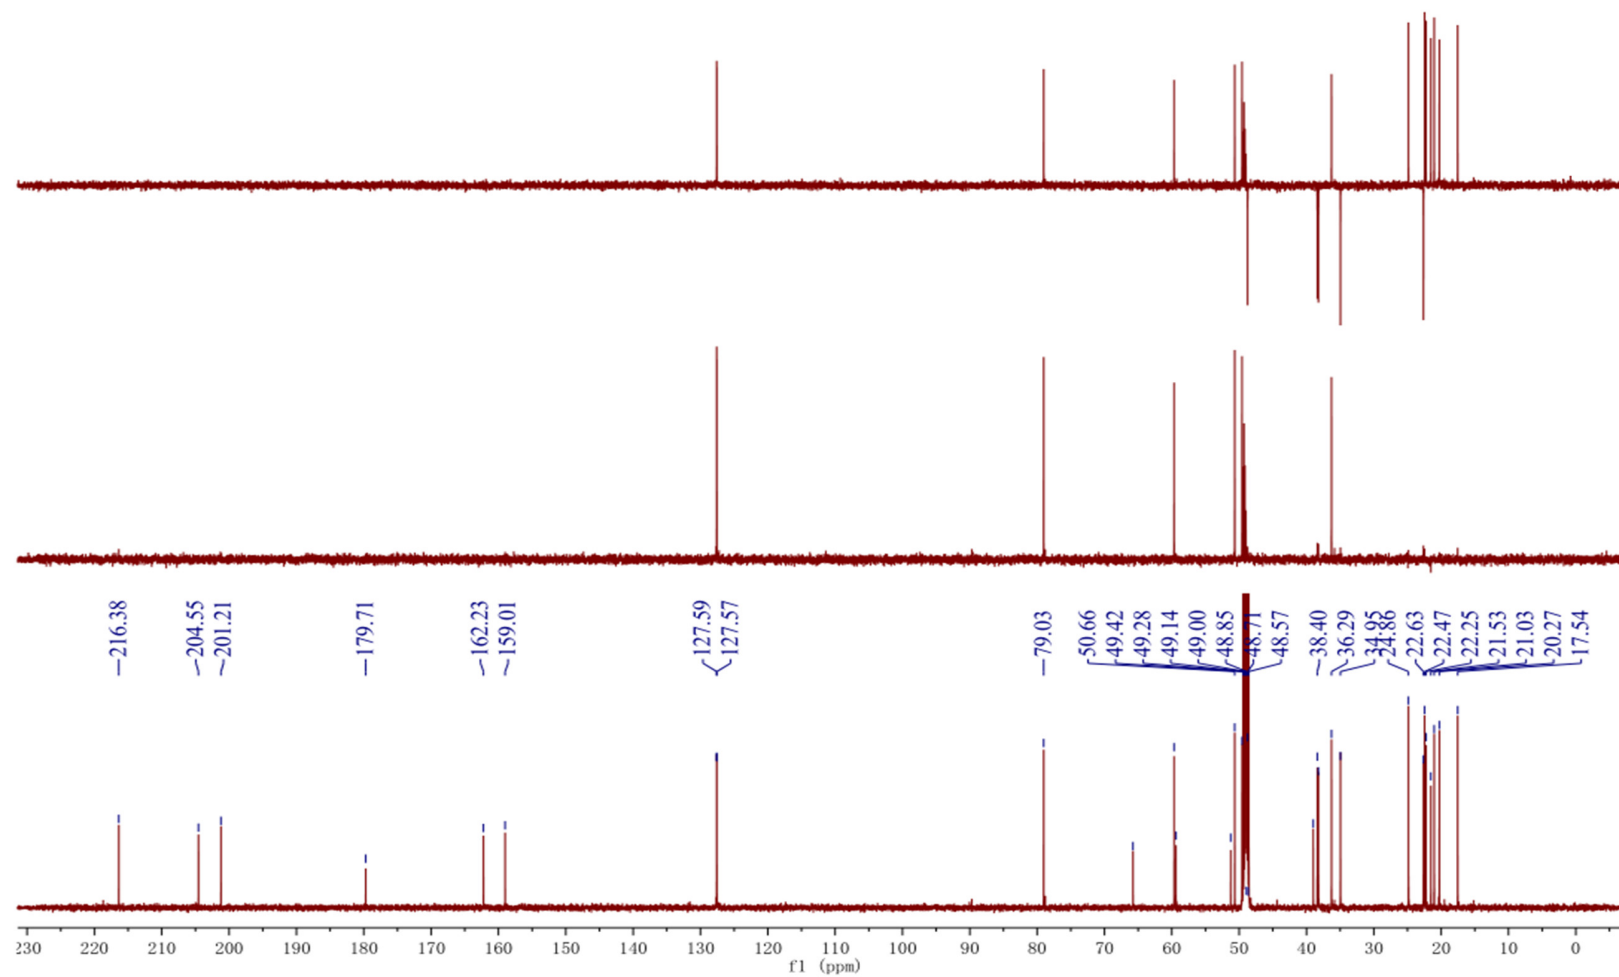

Figure S90.  $^1\text{H}$ - $^1\text{H}$  COSY (600 MHz,  $\text{MeOH-}d_4$ ) spectrum of 13.

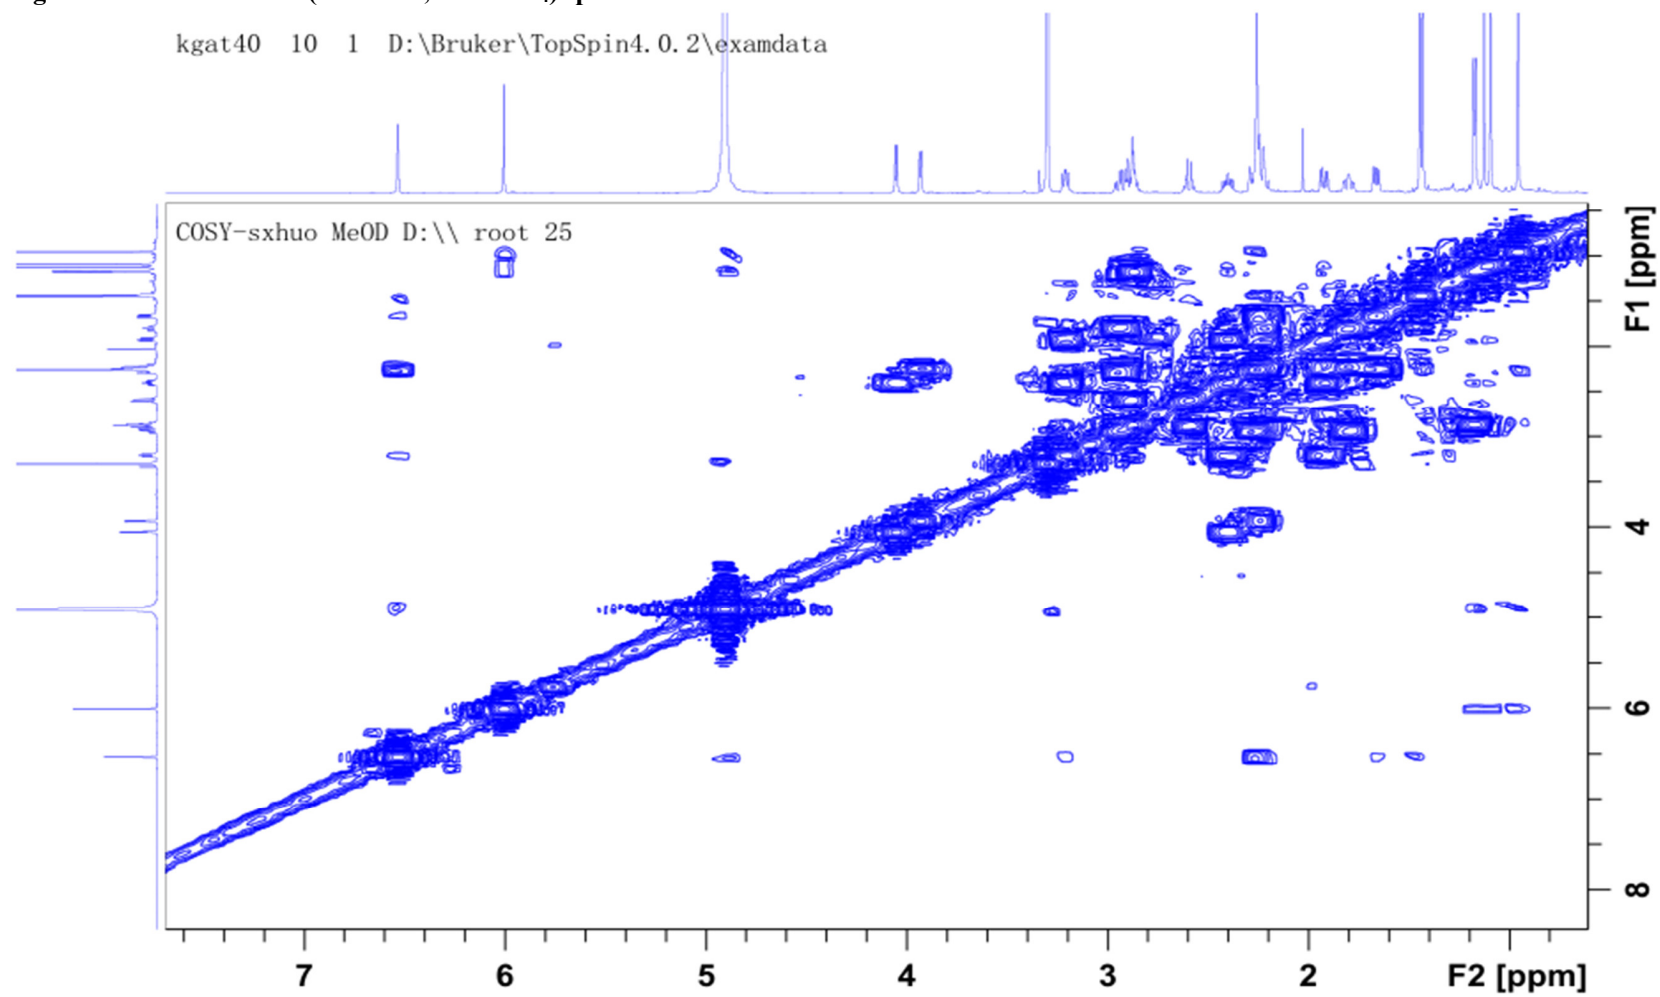

Figure S91. HSQC (600/150 MHz, MeOH-*d*<sub>4</sub>) spectrum of 13.

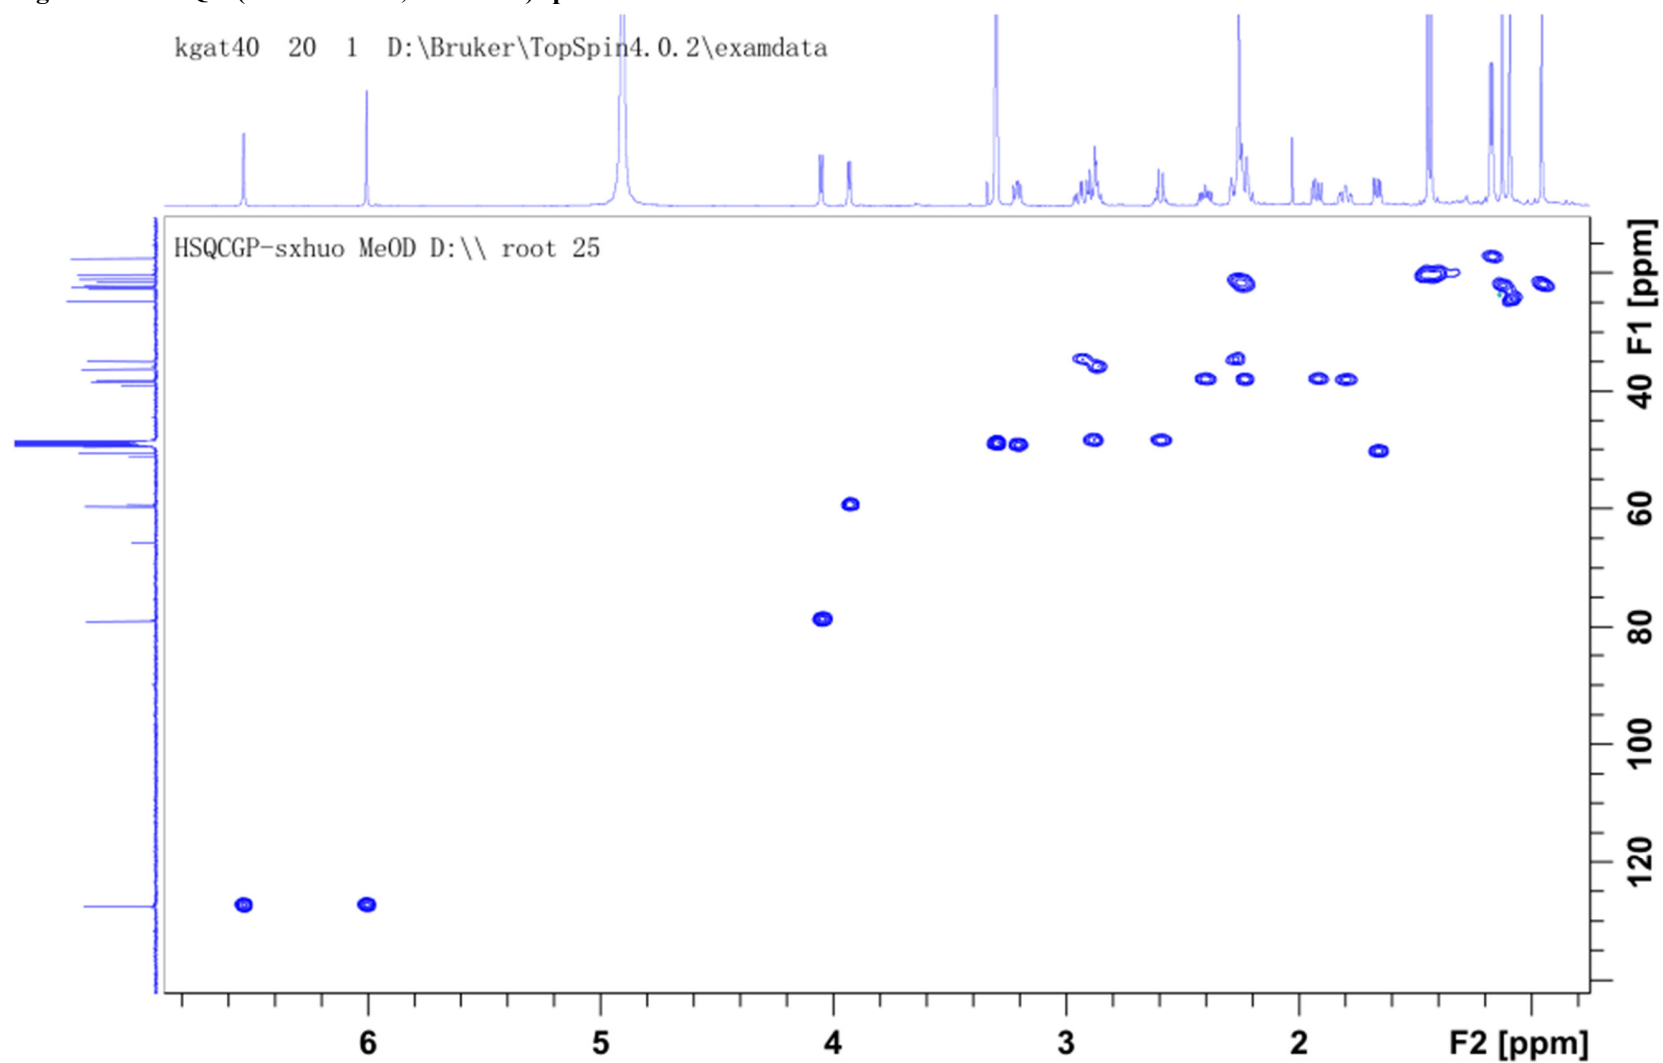



Figure S92. HMBC (600/150 MHz, MeOH-*d*<sub>4</sub>) spectrum of 13.

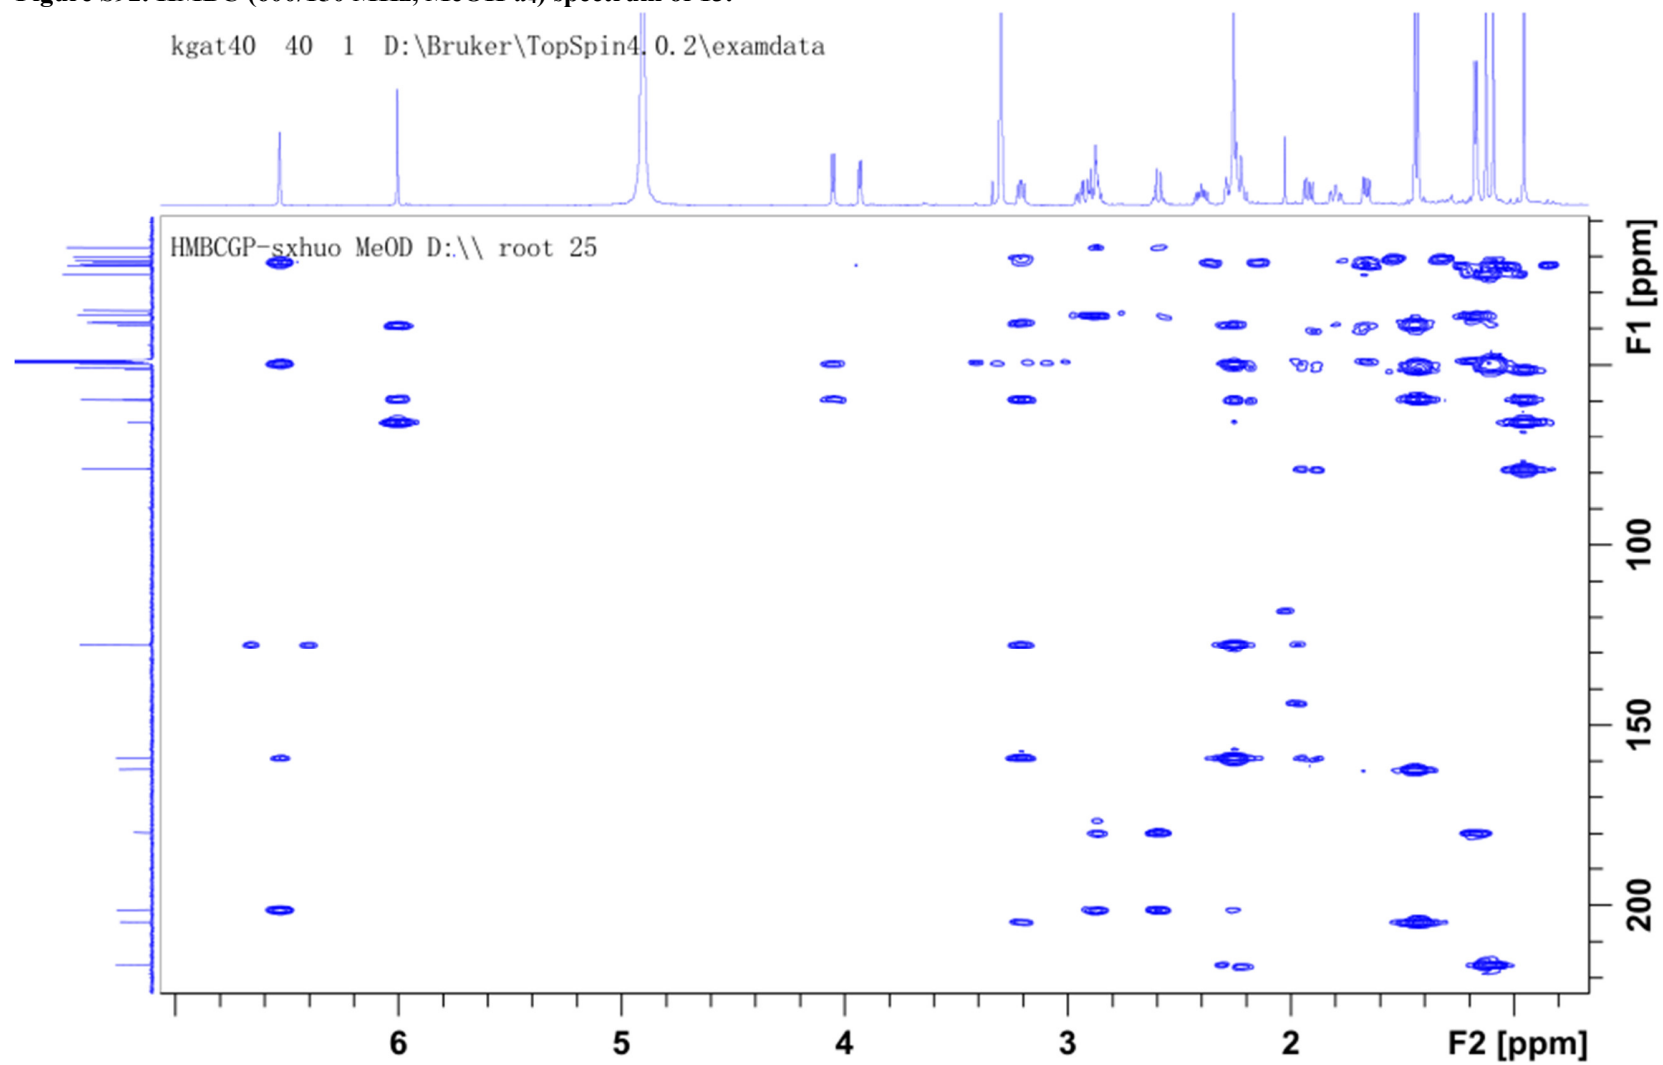

Figure S93. ROESY (600/150 MHz, MeOH-*d*<sub>4</sub>) spectrum of 13.

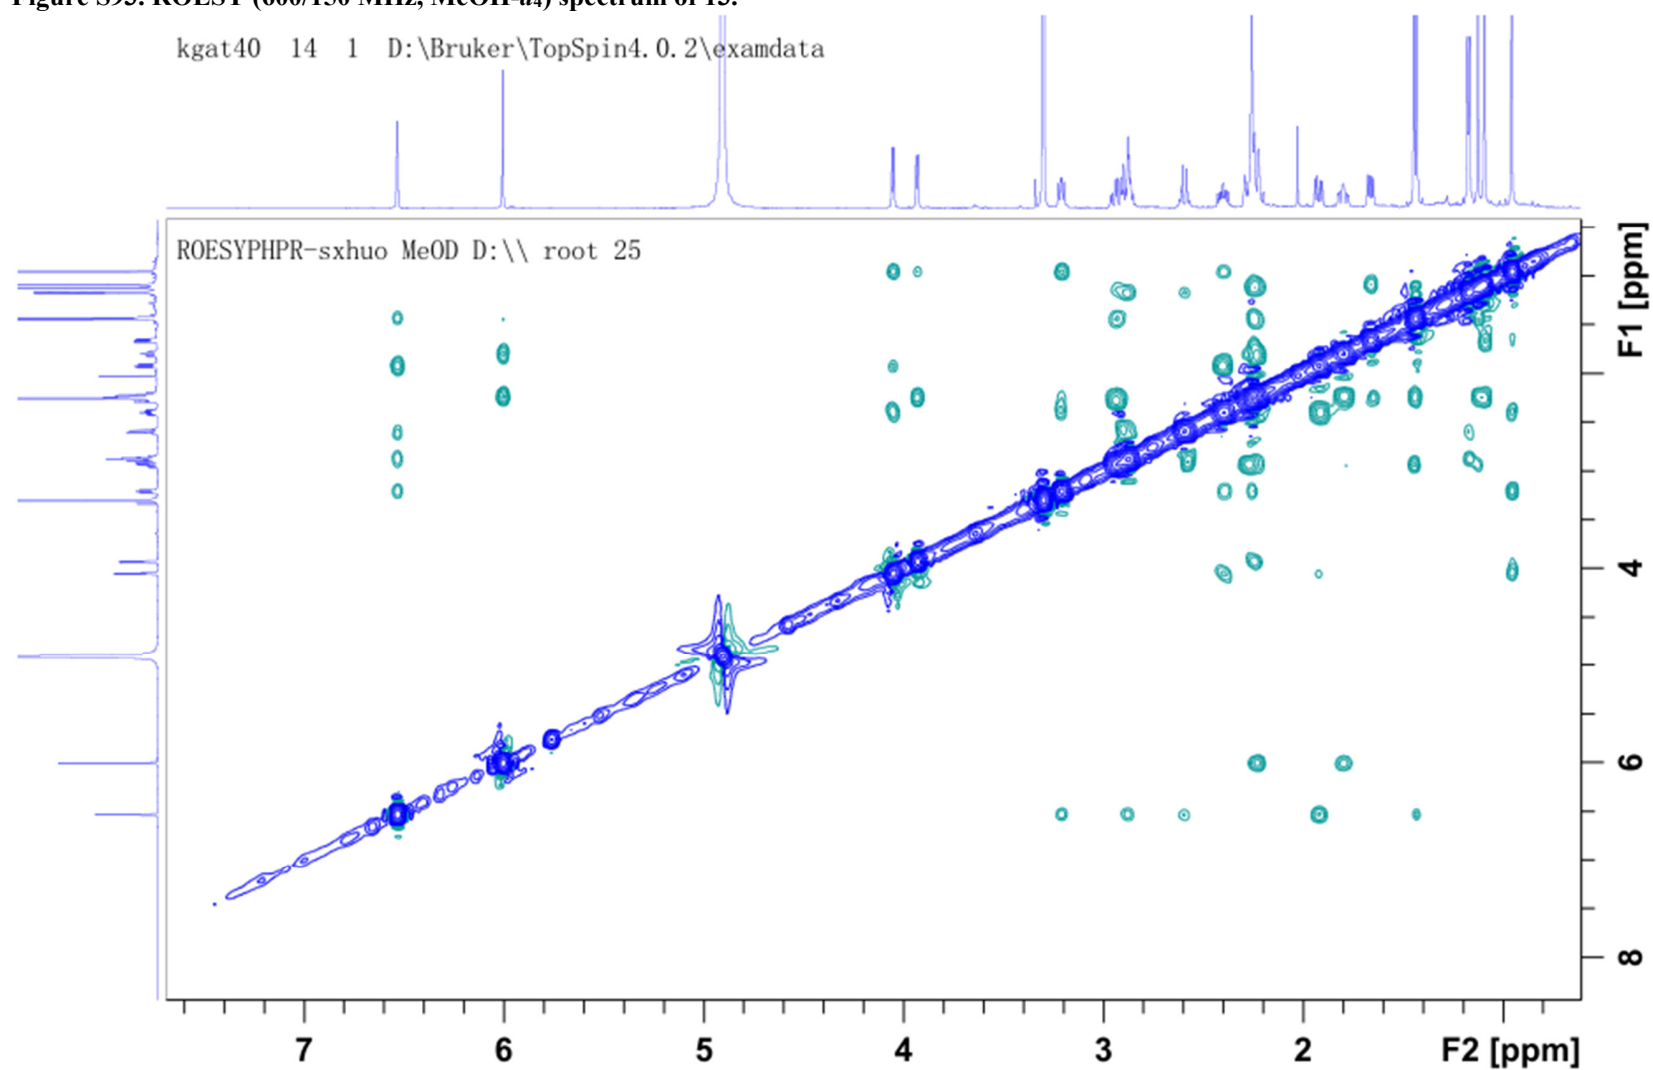

Section S28: HRESIMS spectrum of 13  
Figure S94. HRESIMS spectrum of 13.

### Qualitative Analysis Report

|                               |              |                      |                      |
|-------------------------------|--------------|----------------------|----------------------|
| <b>Data Filename</b>          | kgat40.d     | <b>Sample Name</b>   | kgat40               |
| <b>Sample Type</b>            | Sample       | <b>Position</b>      | P1-B4                |
| <b>Instrument Name</b>        | Instrument 1 | <b>User Name</b>     |                      |
| <b>Acq Method</b>             | s.m          | <b>Acquired Time</b> | 2/25/2021 2:06:00 PM |
| <b>IRM Calibration Status</b> | Success      | <b>DA Method</b>     | Default.m            |
| <b>Comment</b>                |              |                      |                      |

  

|                       |                             |              |  |
|-----------------------|-----------------------------|--------------|--|
| <b>Sample Group</b>   |                             | <b>Info.</b> |  |
| <b>Acquisition SW</b> | 6200 series TOF/6500 series |              |  |
| <b>Version</b>        | Q-TOF B.05.01 (B5125.2)     |              |  |

#### User Spectra

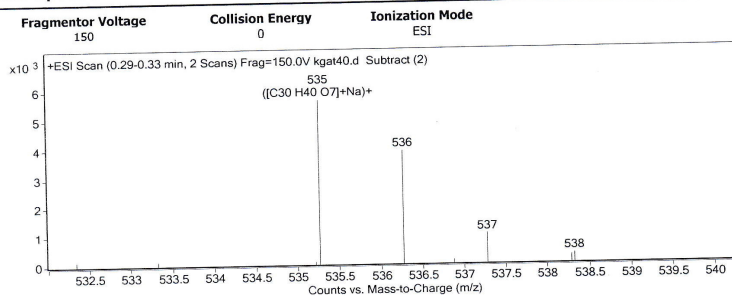

#### Peak List

| m/z | z | Abund    | Formula    | Ion     |
|-----|---|----------|------------|---------|
| 535 |   | 5665.46  | C30 H40 O7 | (M+Na)+ |
| 536 | 1 | 3920.02  |            |         |
| 552 | 1 | 19353.48 |            |         |
| 553 | 1 | 11162.89 |            |         |
| 554 | 1 | 3792.42  |            |         |
| 557 | 1 | 2477.68  |            |         |
| 568 | 1 | 7182.2   |            |         |
| 569 | 1 | 3411.75  |            |         |
| 701 | 1 | 4822.14  |            |         |
| 702 | 1 | 3227.21  |            |         |

#### Formula Calculator Element Limits

| Element | Min | Max |
|---------|-----|-----|
| C       | 3   | 60  |
| H       | 0   | 120 |
| O       | 0   | 30  |

#### Formula Calculator Results

| Formula    | CalculatedMass | CalculatedMz | Mz       | Diff. (mDa) | Diff. (ppm) | DBE     |
|------------|----------------|--------------|----------|-------------|-------------|---------|
| C30 H40 O7 | 512.2774       | 535.0000     | 535.0000 | 0.00        | 0.00        | 11.0000 |

--- End Of Report ---

## Section S29: 1D and 2D NMR spectra of compound 14

Figure S95.  $^1\text{H}$  NMR (600 MHz,  $\text{MeOH-}d_4$ ) spectrum of 14.

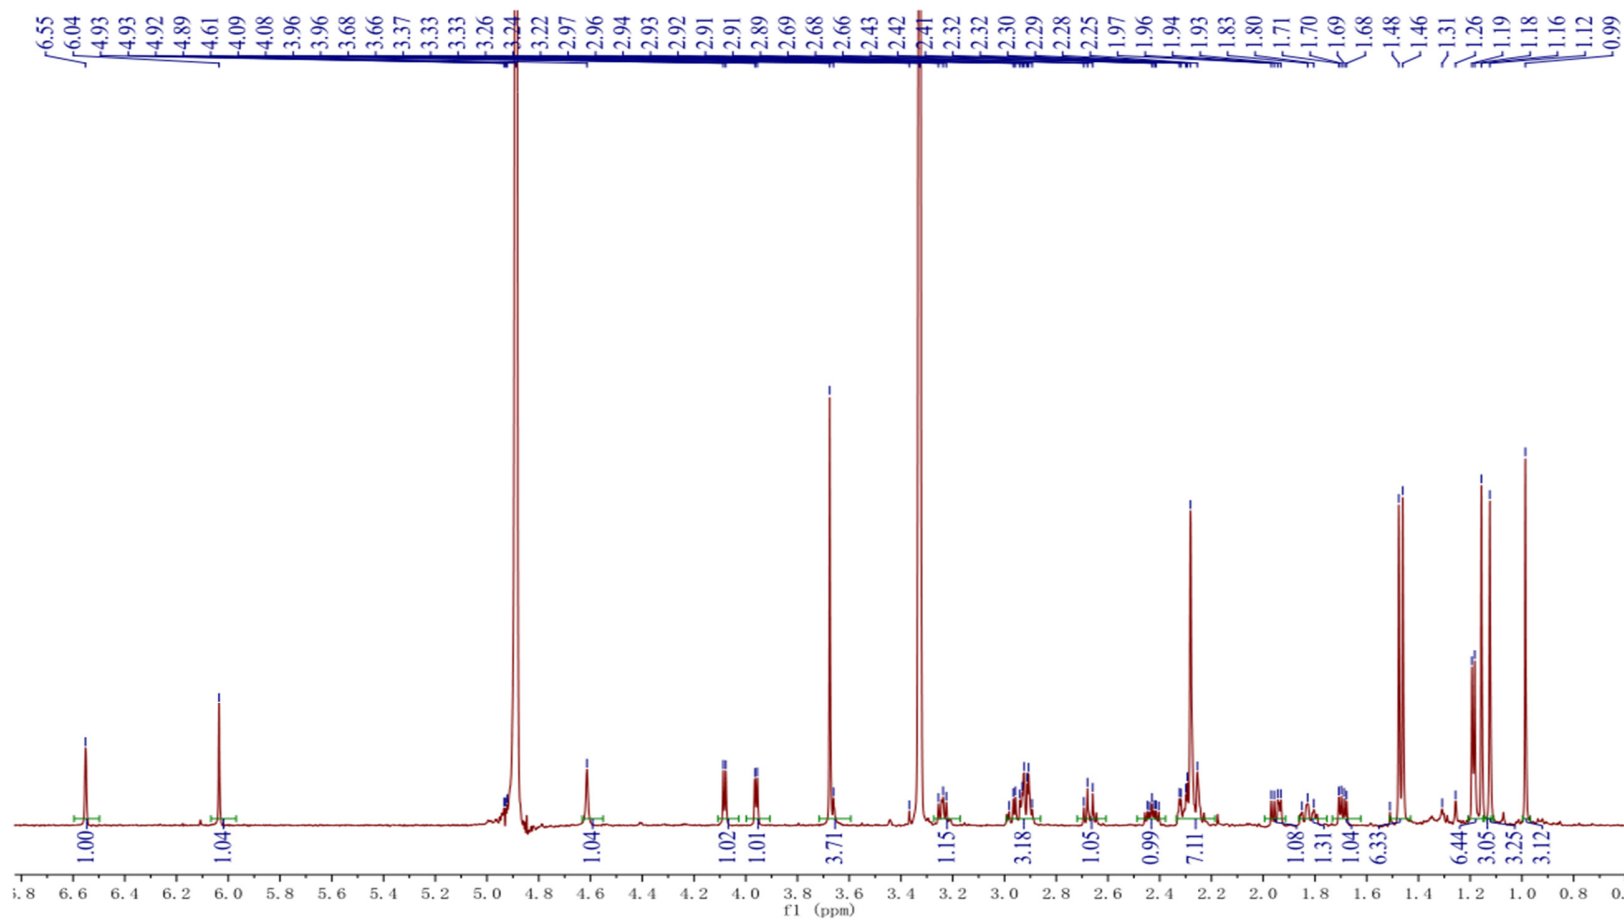

Figure S96.  $^{13}\text{C}$  NMR (150 MHz,  $\text{MeOH-}d_4$ ) spectrum of 14.

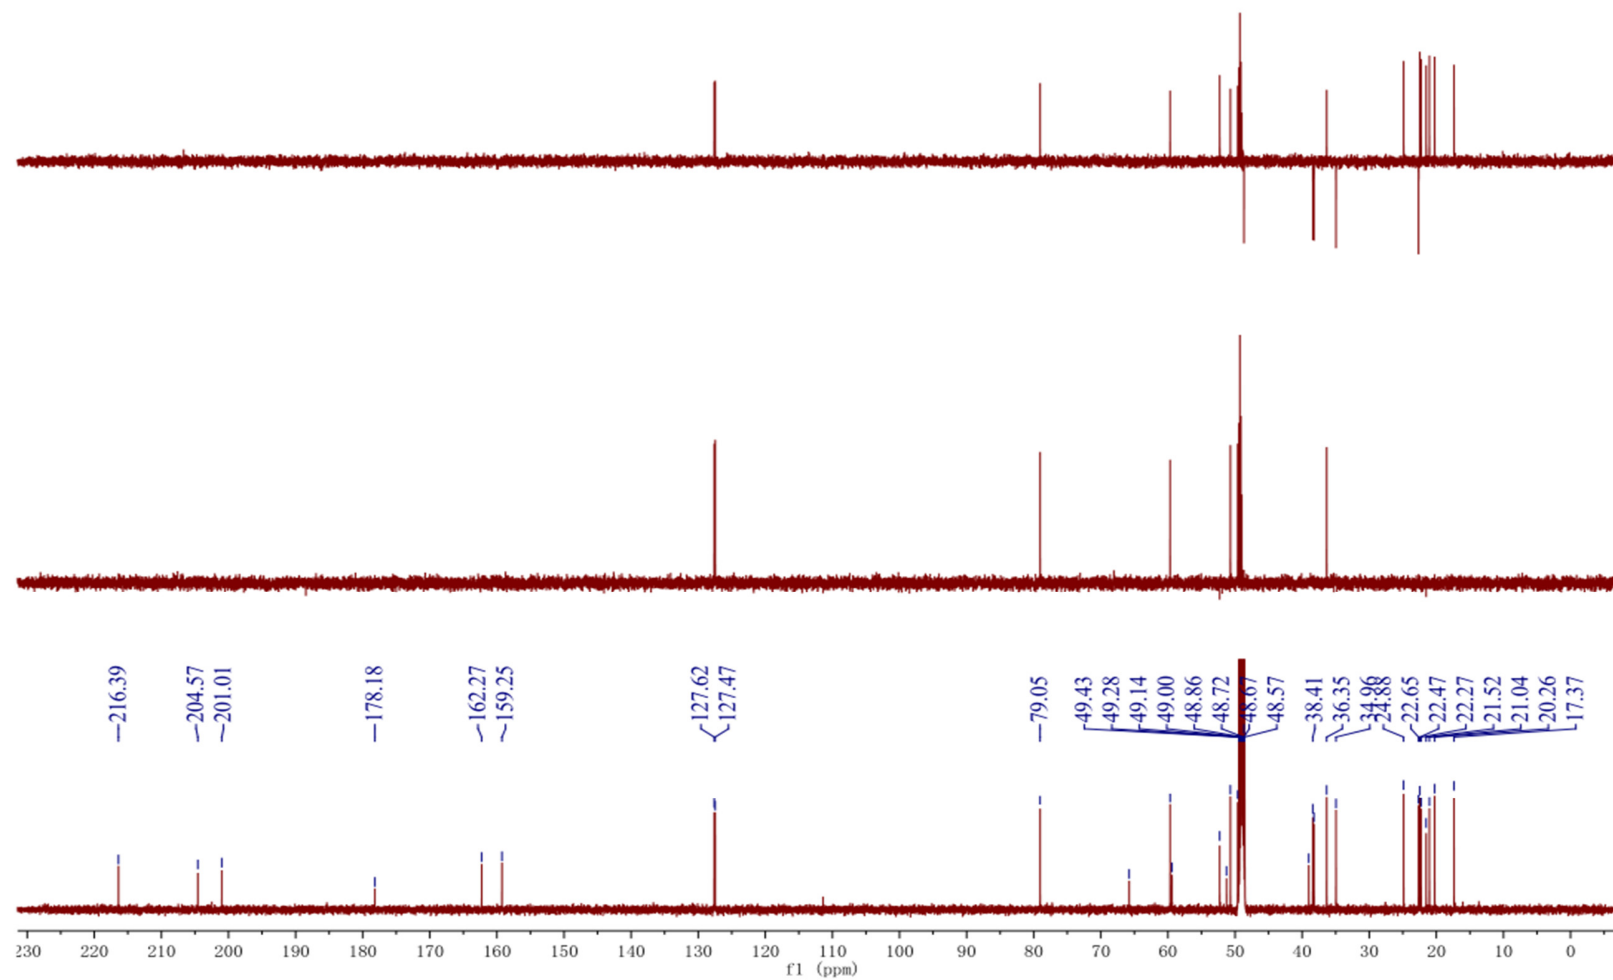

2D COSY NMR spectrum of compound 23 in MeOD. The plot shows correlations between protons, with a diagonal of 1D <sup>1</sup>H NMR peaks. Significant cross-peaks are observed, particularly in the aromatic region (6-7 ppm) and the aliphatic region (2-4 ppm). The x-axis is labeled F2 [ppm] and the y-axis is labeled F1 [ppm].



Figure S99. HMBC (600/150 MHz, MeOH-*d*<sub>4</sub>) spectrum of 14.

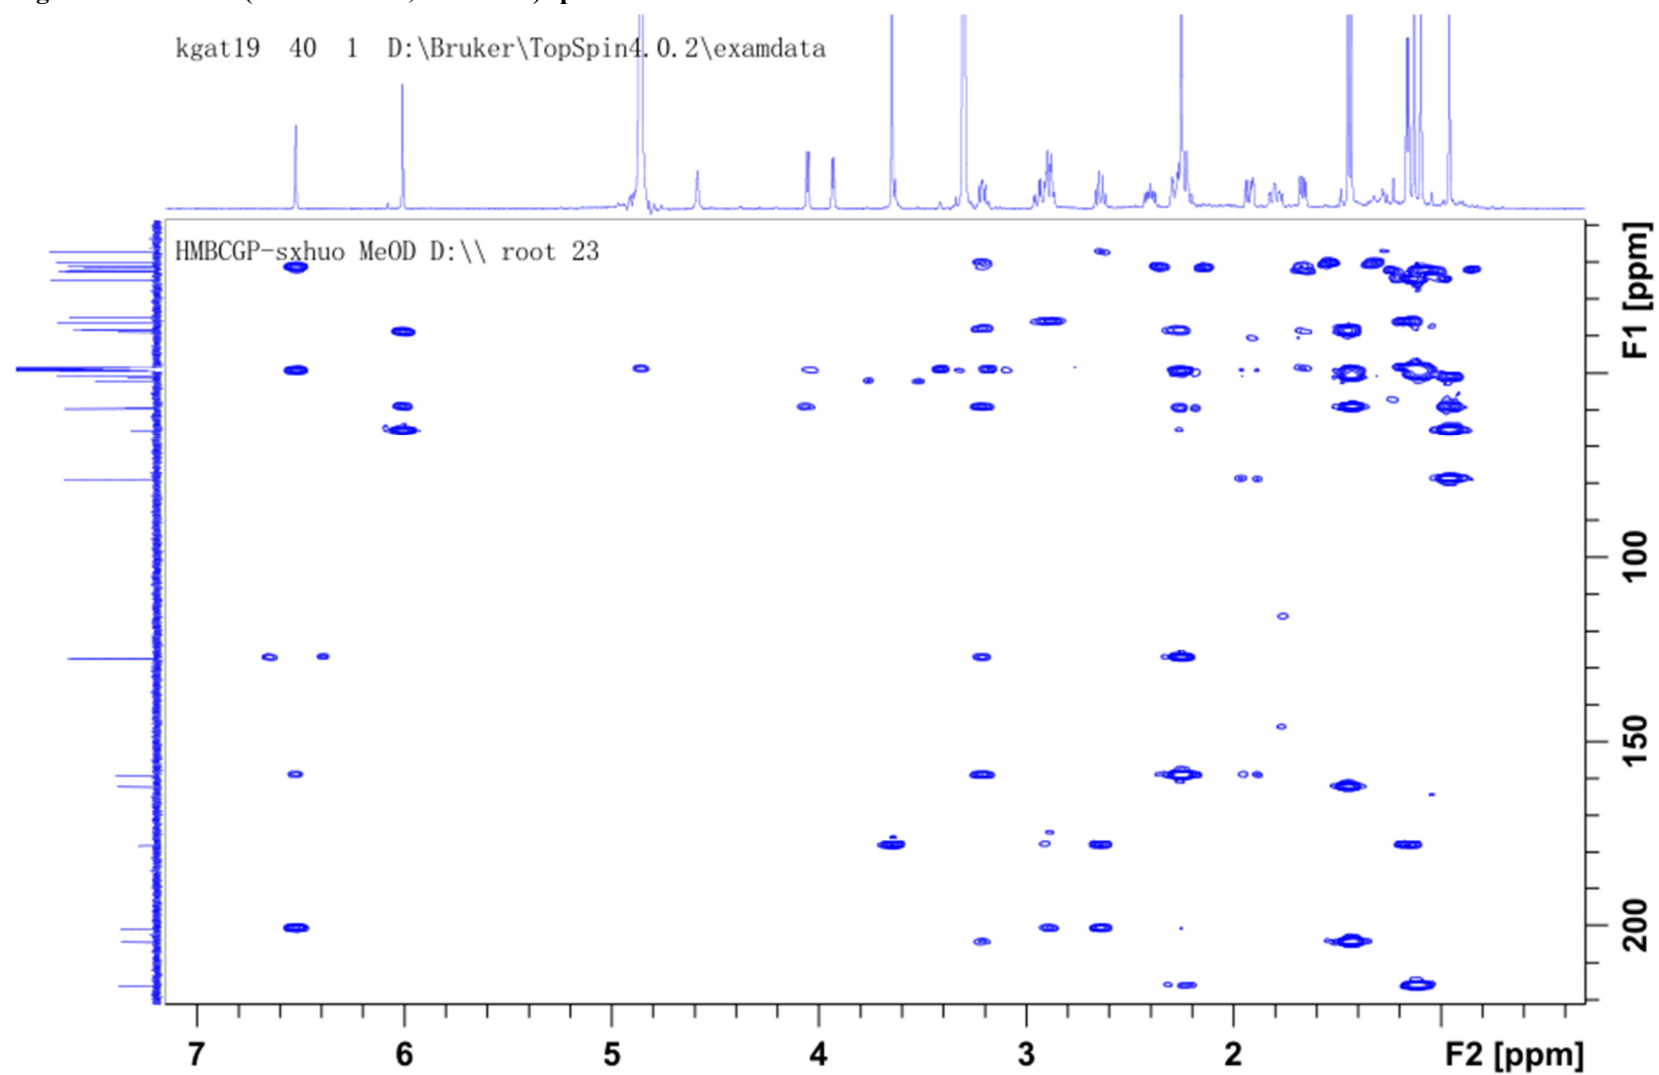



Figure S100. ROESY (600/150 MHz, MeOH-*d*<sub>4</sub>) spectrum of 14.

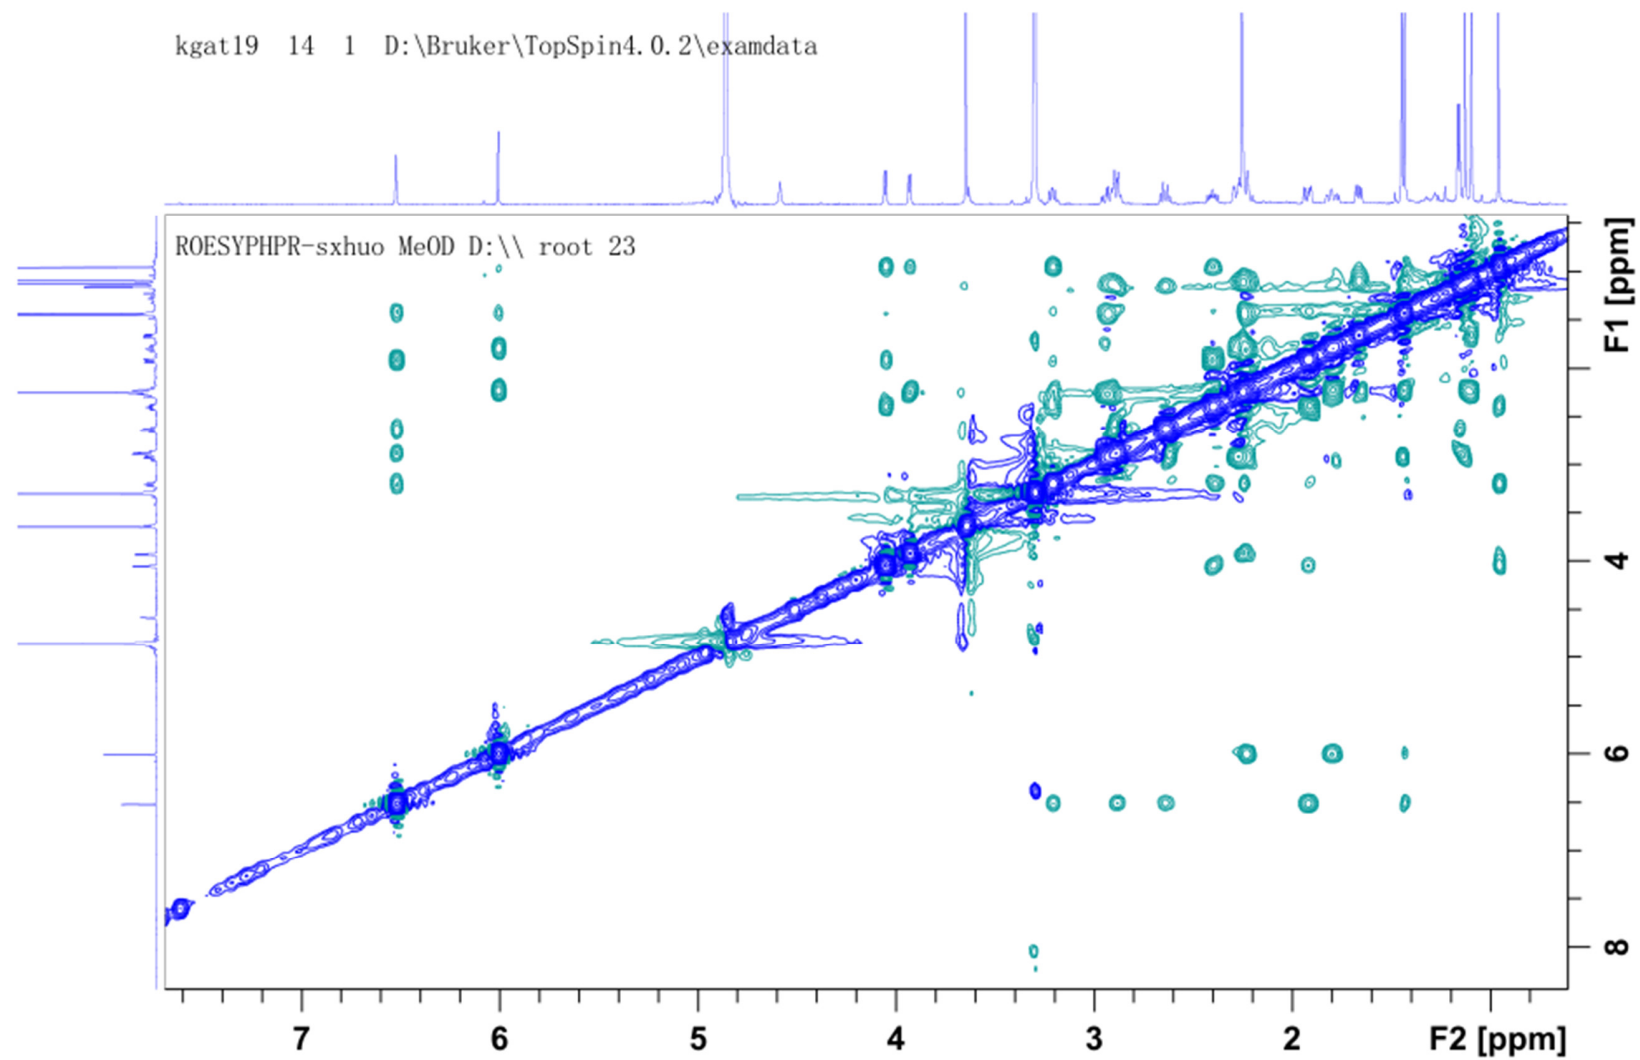

## Section S30: HRESIMS spectrum of 14

Figure S101. HRESIMS spectrum of 14.

### Qualitative Analysis Report

|                               |              |                      |                       |
|-------------------------------|--------------|----------------------|-----------------------|
| <b>Data Filename</b>          | kgat19.d     | <b>Sample Name</b>   | kgat19                |
| <b>Sample Type</b>            | Sample       | <b>Position</b>      | P1-A8                 |
| <b>Instrument Name</b>        | Instrument 1 | <b>User Name</b>     |                       |
| <b>Acq Method</b>             | s.m          | <b>Acquired Time</b> | 2/25/2021 11:45:17 AM |
| <b>IRM Calibration Status</b> | Success      | <b>DA Method</b>     | Default.m             |
| <b>Comment</b>                |              |                      |                       |

|                       |                             |              |
|-----------------------|-----------------------------|--------------|
| <b>Sample Group</b>   |                             | <b>Info.</b> |
| <b>Acquisition SW</b> | 6200 series TOF/6500 series |              |
| <b>Version</b>        | Q-TOF B.05.01 (B5125.2)     |              |

#### User Spectra

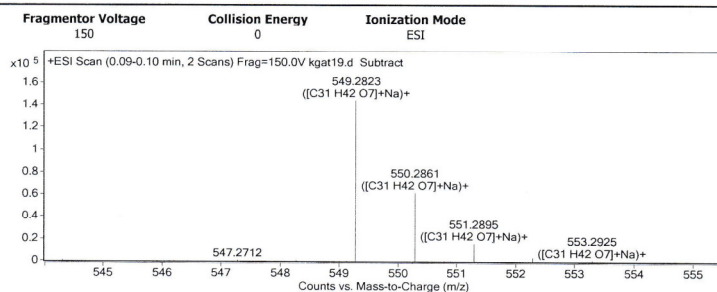

#### Peak List

| m/z       | z | Abund     | Formula    | Ion     |
|-----------|---|-----------|------------|---------|
| 535.3027  | 1 | 41472.34  |            |         |
| 536.3062  | 1 | 16993.7   |            |         |
| 549.2823  | 1 | 144187.16 | C31 H42 O7 | (M+Na)+ |
| 550.2861  | 1 | 61901.48  | C31 H42 O7 | (M+Na)+ |
| 551.2895  | 1 | 15919.39  | C31 H42 O7 | (M+Na)+ |
| 565.2684  | 1 | 22792.32  |            |         |
| 698.3868  | 1 | 20275.38  |            |         |
| 1061.5959 | 1 | 17146.34  |            |         |
| 1075.5751 | 1 | 36301.75  |            |         |
| 1076.5791 | 1 | 32261.56  |            |         |

#### Formula Calculator Element Limits

| Element | Min | Max |
|---------|-----|-----|
| C       | 3   | 60  |
| H       | 0   | 120 |
| O       | 0   | 30  |

#### Formula Calculator Results

| Formula    | CalculatedMass | CalculatedMz | Mz       | Diff. (mDa) | Diff. (ppm) | DBE     |
|------------|----------------|--------------|----------|-------------|-------------|---------|
| C31 H42 O7 | 526.2931       | 549.2823     | 549.2823 | 0.00        | 0.00        | 11.0000 |

--- End Of Report ---

# Section S31: 1D and 2D NMR spectra of compound 15

Figure S102. Comparison of the  $^1\text{H}$  NMR (600 MHz,  $\text{MeOH-}d_4$ ) spectra of 15 and 28.

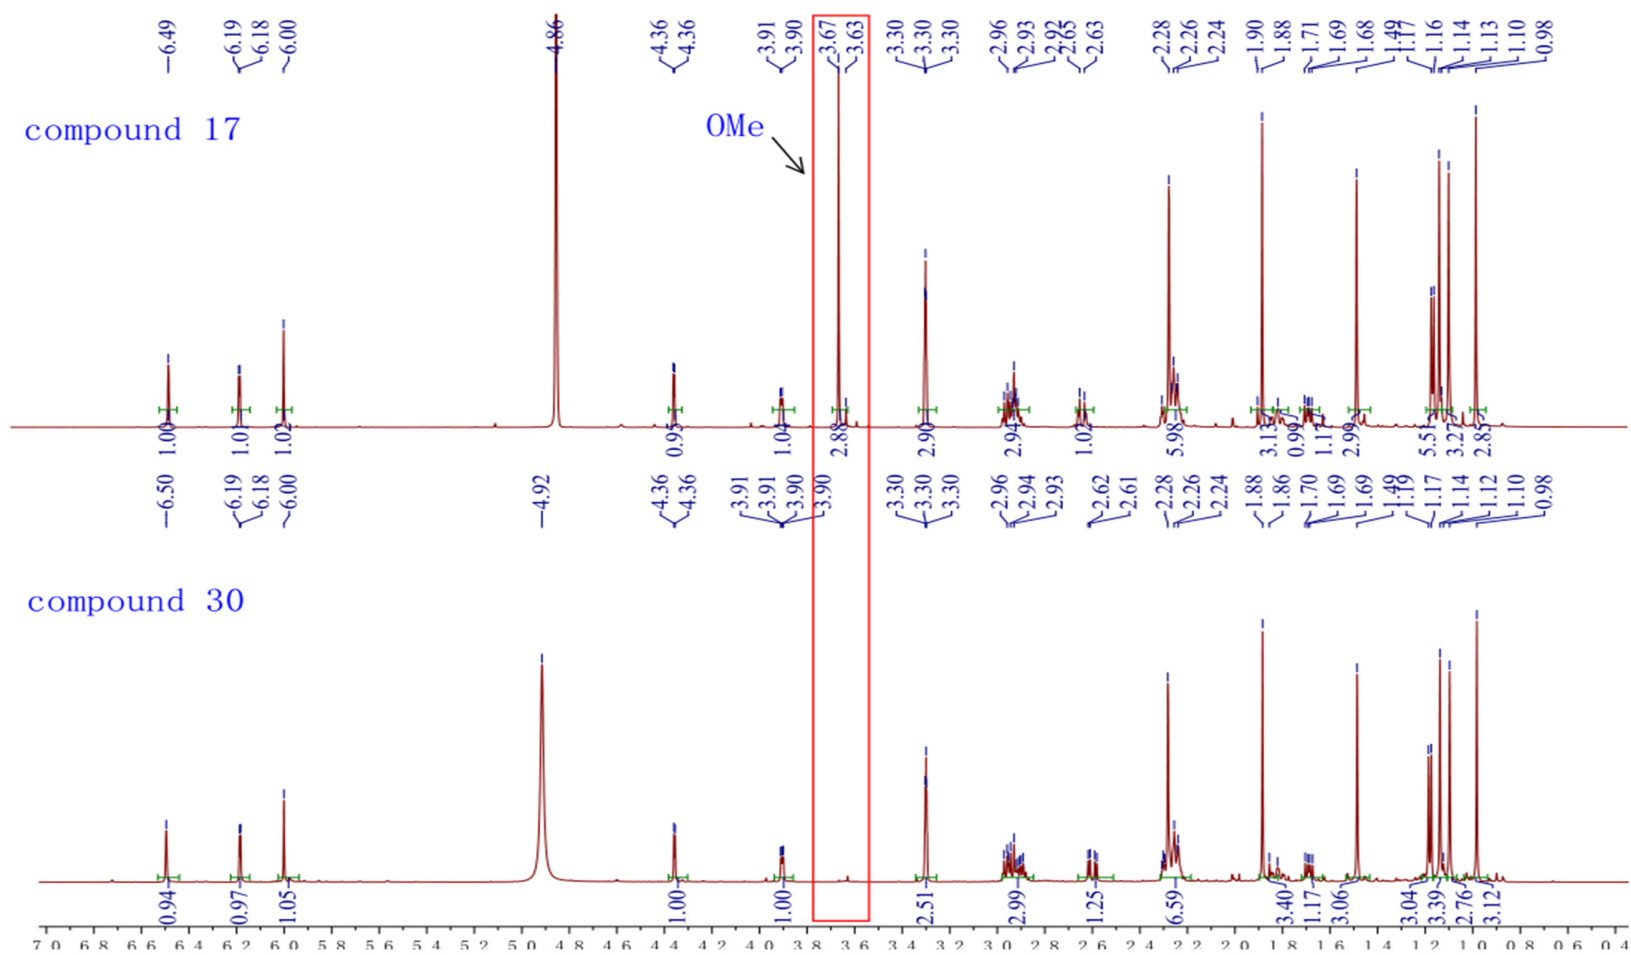

## Section S32: HRESIMS spectrum of 15

Figure S103. HRESIMS spectrum of 15.

### Qualitative Analysis Report

|                               |              |                      |                       |
|-------------------------------|--------------|----------------------|-----------------------|
| <b>Data Filename</b>          | kgat24.d     | <b>Sample Name</b>   | kgat24                |
| <b>Sample Type</b>            | Sample       | <b>Position</b>      | P1-B2                 |
| <b>Instrument Name</b>        | Instrument 1 | <b>User Name</b>     |                       |
| <b>Acq Method</b>             | s.m          | <b>Acquired Time</b> | 2/25/2021 11:48:49 AM |
| <b>IRM Calibration Status</b> | Success      | <b>DA Method</b>     | Default.m             |
| <b>Comment</b>                |              |                      |                       |

  

|                       |                             |              |
|-----------------------|-----------------------------|--------------|
| <b>Sample Group</b>   |                             | <b>Info.</b> |
| <b>Acquisition SW</b> | 6200 series TOF/6500 series |              |
| <b>Version</b>        | Q-TOF B.05.01 (B5125.2)     |              |

### User Spectra

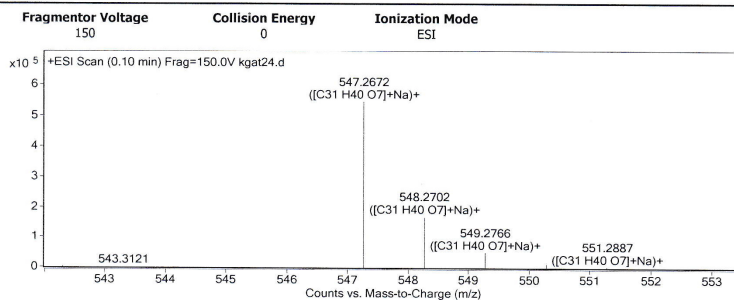

### Peak List

| m/z       | z | Abund     | Formula    | Ion     |
|-----------|---|-----------|------------|---------|
| 172.0937  | 1 | 58406.09  |            |         |
| 507.2738  | 1 | 47417.16  |            |         |
| 547.2672  | 1 | 545135.31 | C31 H40 O7 | (M+Na)+ |
| 548.2702  | 1 | 169740.53 | C31 H40 O7 | (M+Na)+ |
| 549.2766  | 1 | 49009.27  | C31 H40 O7 | (M+Na)+ |
| 563.2411  | 1 | 65920.91  |            |         |
| 696.372   | 1 | 58927.06  |            |         |
| 1071.5453 | 1 | 236543.08 |            |         |
| 1072.5485 | 1 | 156751.8  |            |         |
| 1073.5541 | 1 | 76835.13  |            |         |

### Formula Calculator Element Limits

| Element | Min | Max |
|---------|-----|-----|
| C       | 3   | 60  |
| H       | 0   | 120 |
| O       | 0   | 30  |

### Formula Calculator Results

| Formula    | CalculatedMass | CalculatedMz | Mz       | Diff. (mDa) | Diff. (ppm) | DBE     |
|------------|----------------|--------------|----------|-------------|-------------|---------|
| C31 H40 O7 | 524.2774       | 547.2666     | 547.2672 | -0.60       | -1.10       | 12.0000 |

--- End Of Report ---

# Section S33: 1D and 2D NMR spectra of compound 16

Figure S104.  $^1\text{H}$  NMR (600 MHz,  $\text{CDCl}_3$ ) spectrum of 16.

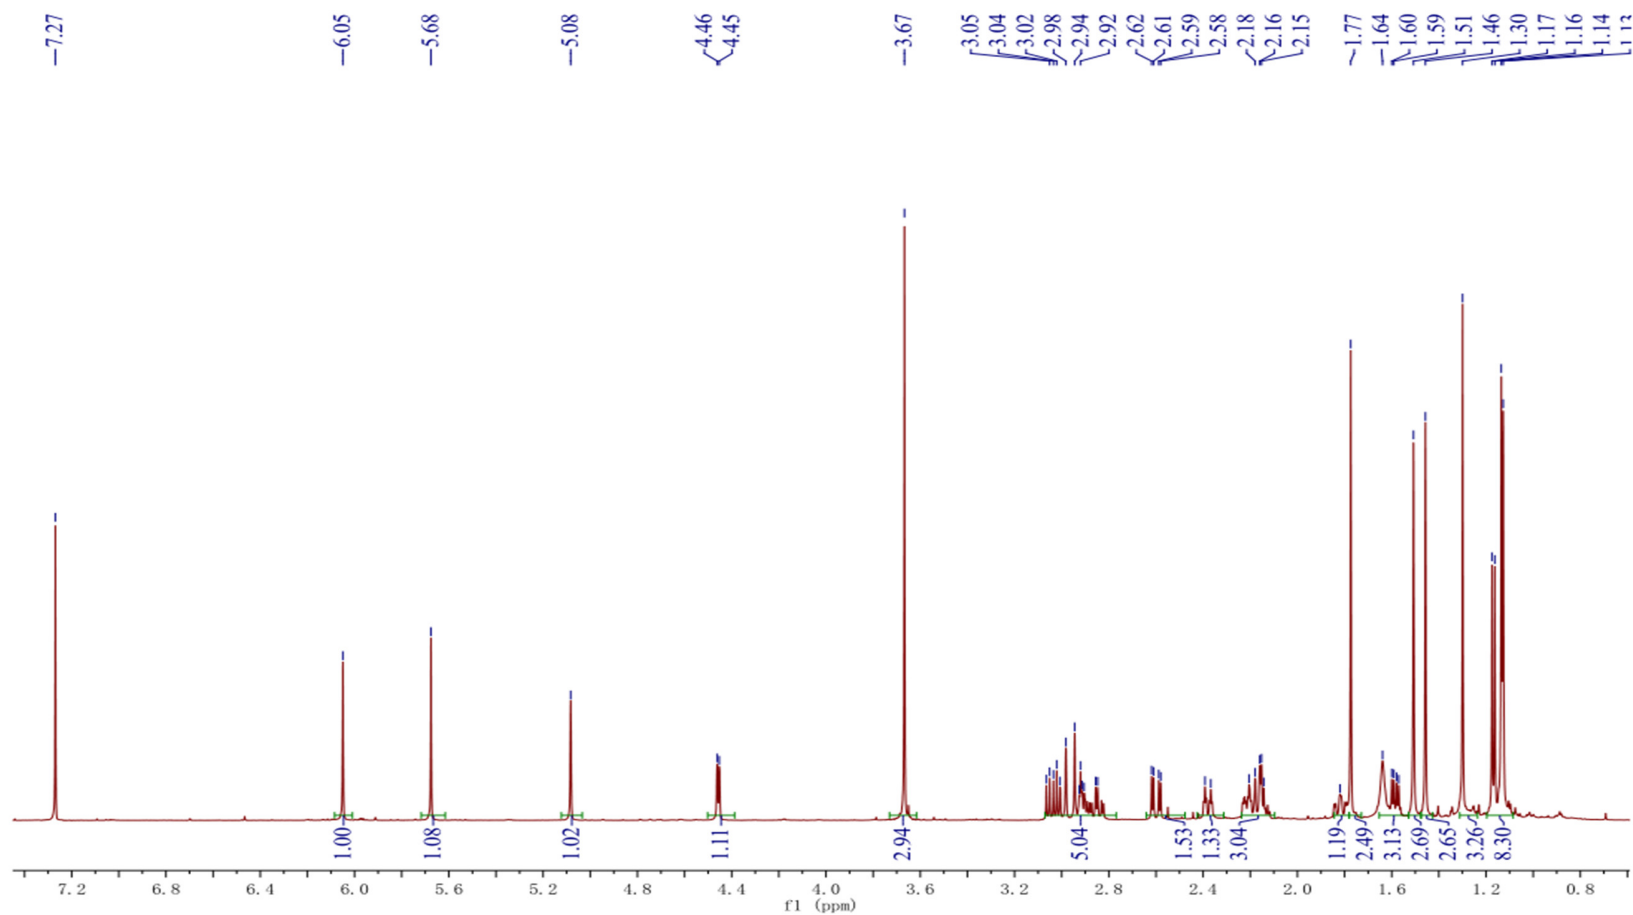

Figure S105.  $^{13}\text{C}$  NMR (150 MHz,  $\text{CDCl}_3$ ) spectrum of 16.

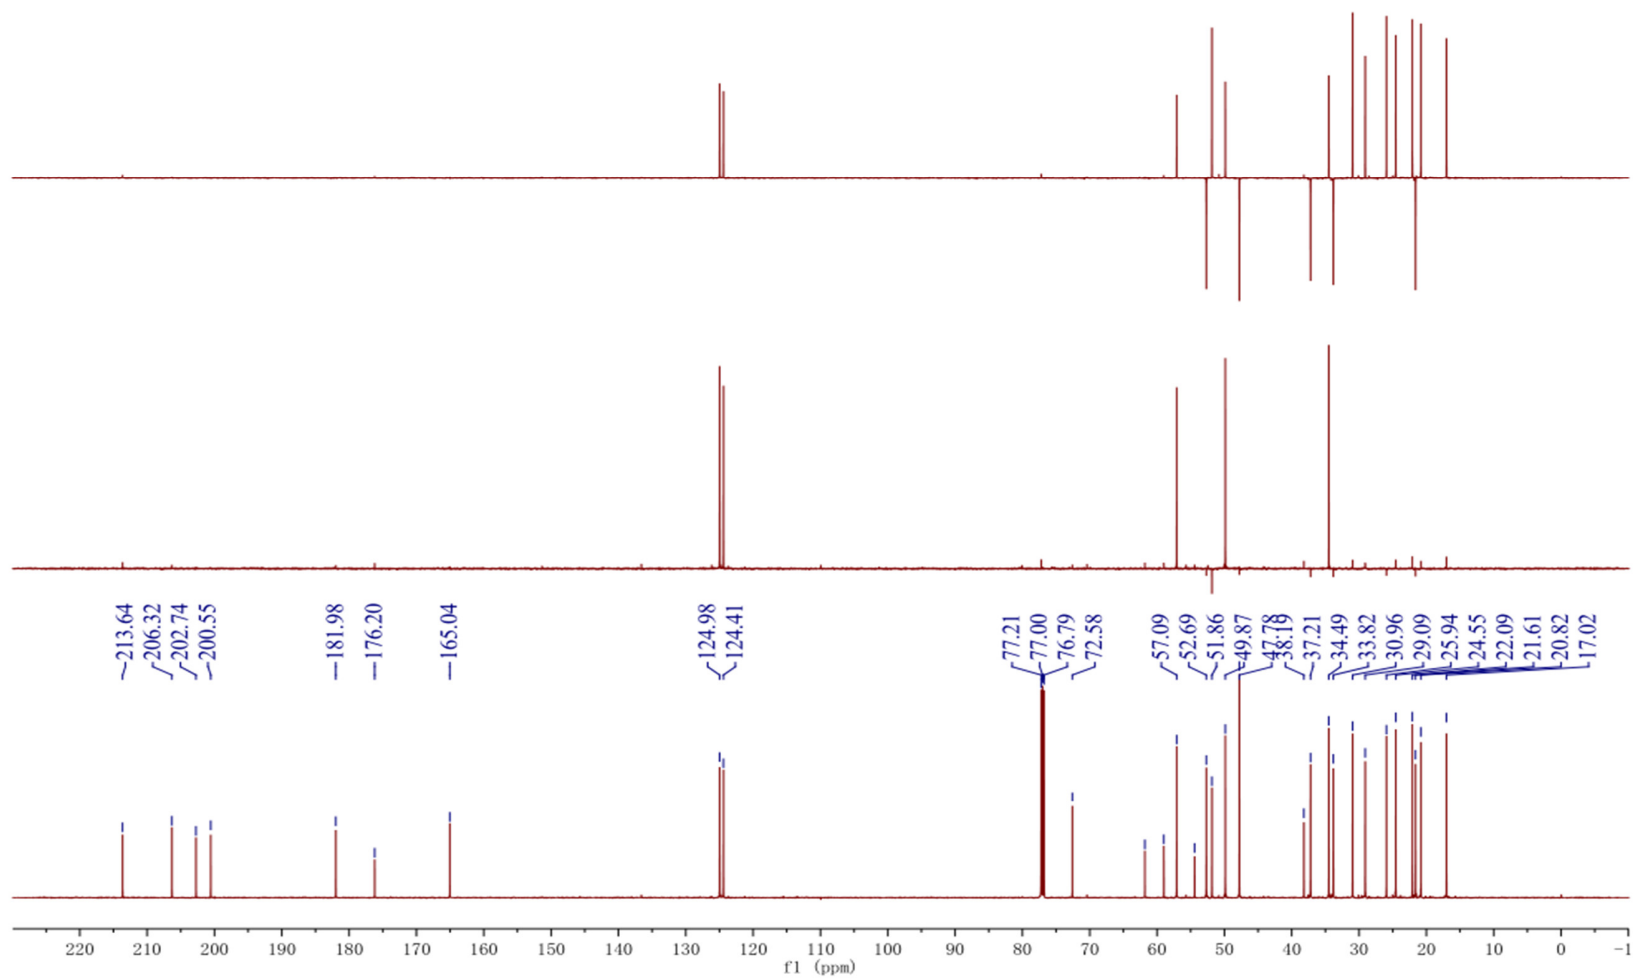

Figure S106.  $^1\text{H}$ - $^1\text{H}$  COSY (600 MHz,  $\text{CDCl}_3$ ) spectrum of 16.

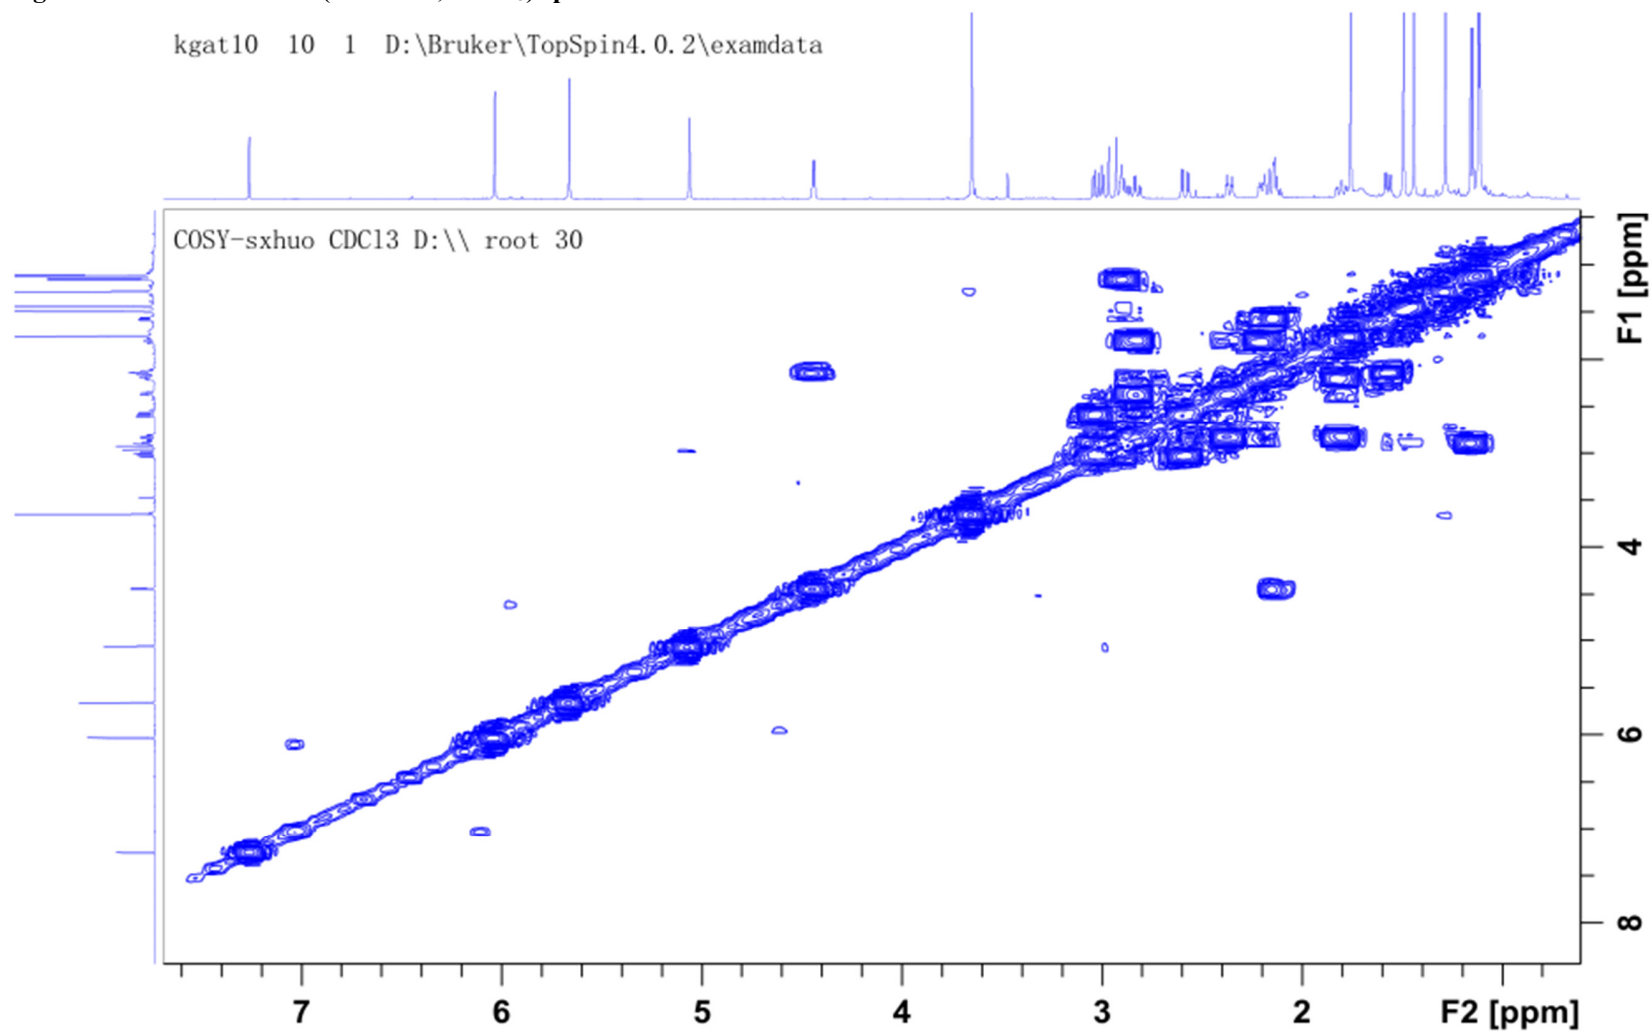

Figure S107. HSQC (600/150 MHz, CDCl<sub>3</sub>) spectrum of 16.

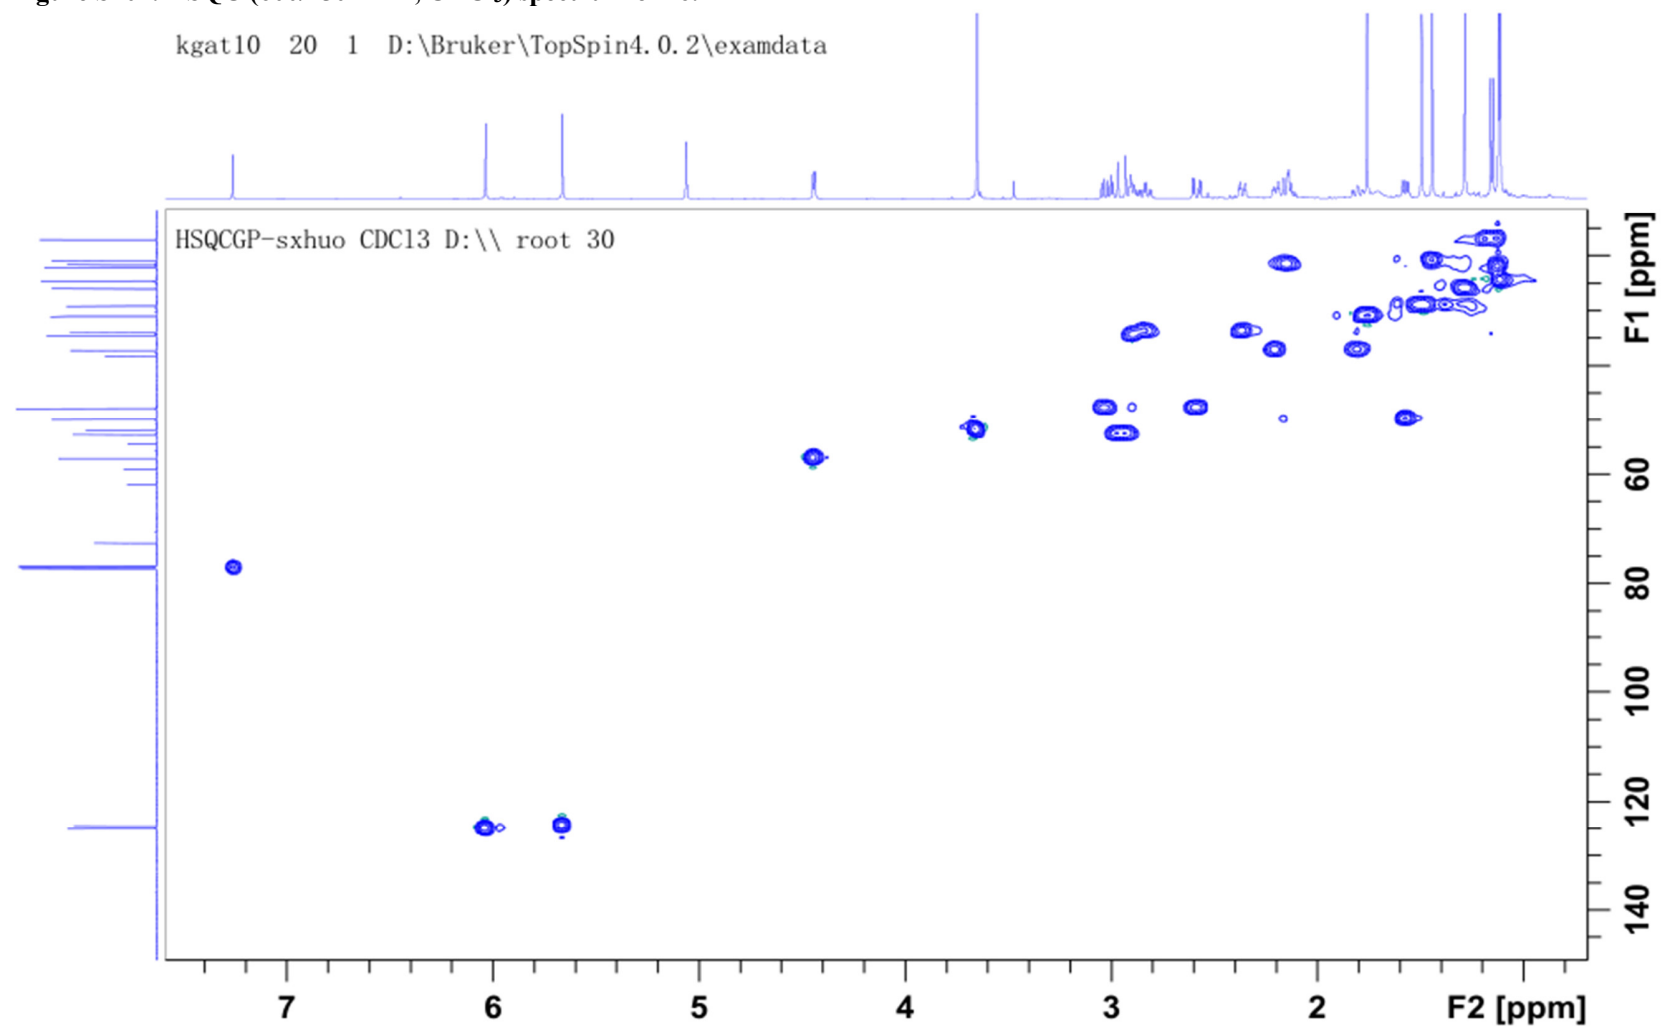



Figure S108. HMBC (600/150 MHz, CDCl<sub>3</sub>) spectrum of 16.

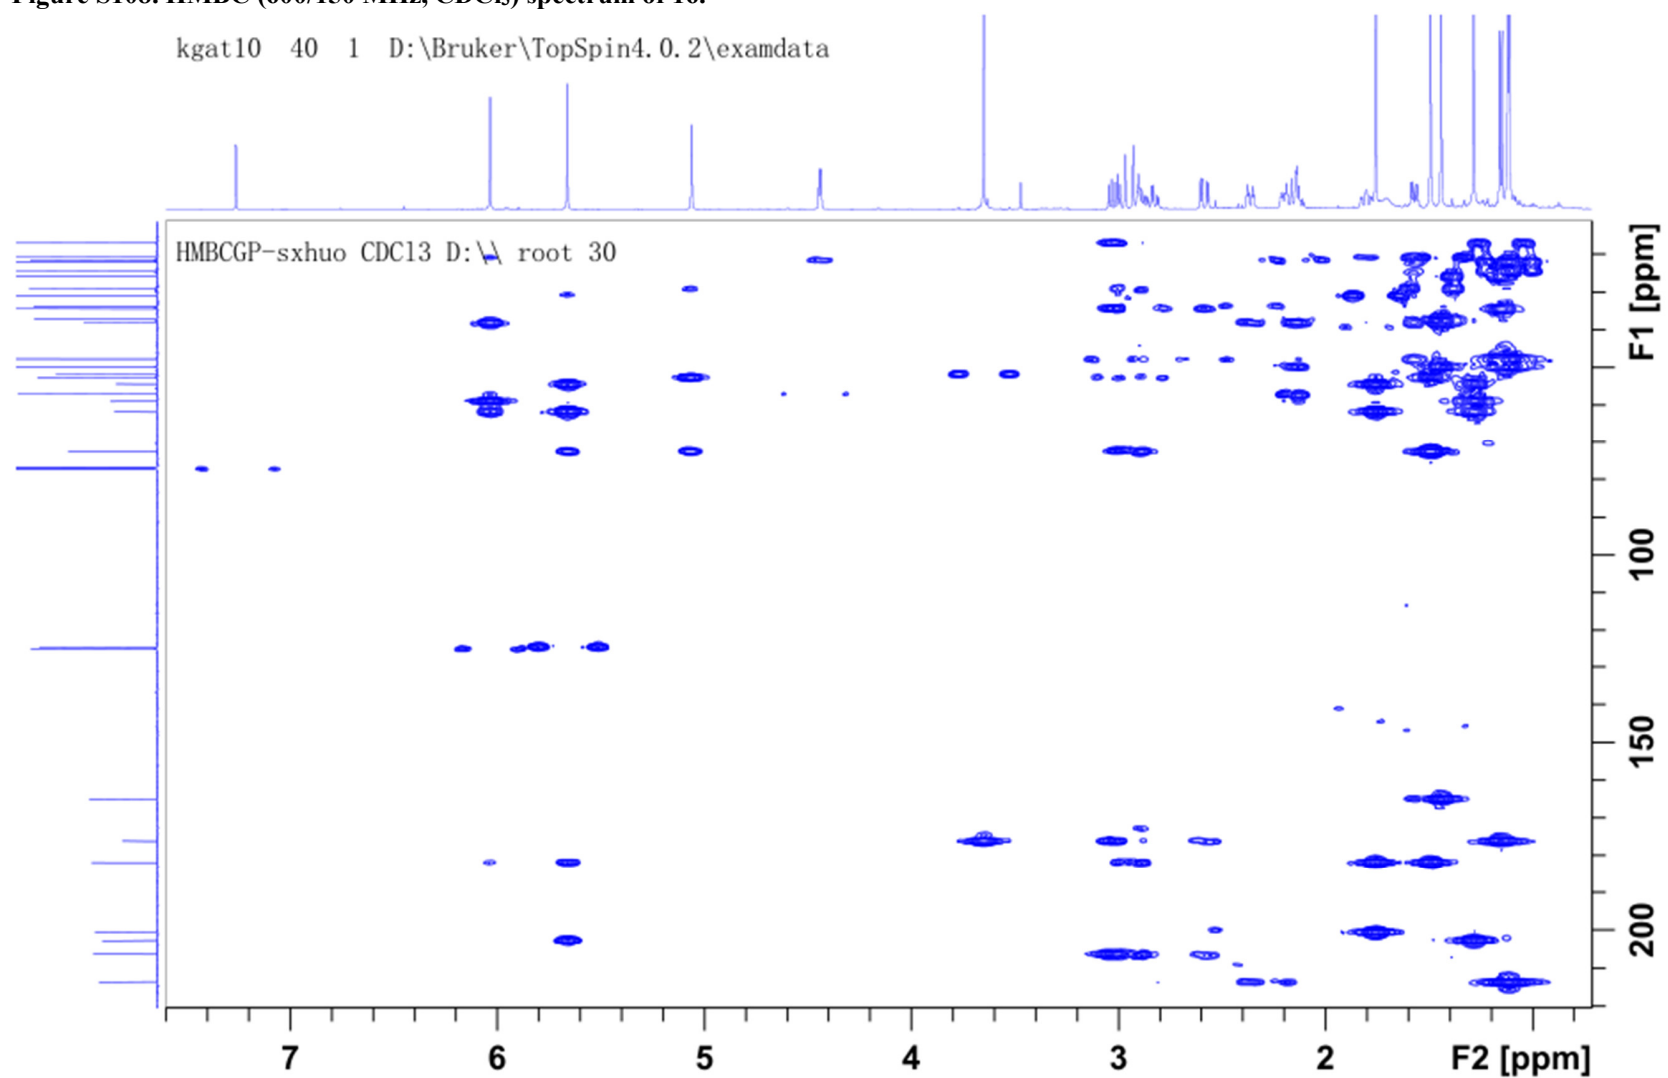

ROESY-sxhuo CDC13 D:\\ root 30

**Section S34: HRESIMS spectrum of 16**  
**Figure S110. HRESIMS spectrum of 16.**

### Qualitative Analysis Report

|                               |              |                      |                       |
|-------------------------------|--------------|----------------------|-----------------------|
| <b>Data Filename</b>          | kgat10.d     | <b>Sample Name</b>   | kgat10                |
| <b>Sample Type</b>            | Sample       | <b>Position</b>      | P1-A5                 |
| <b>Instrument Name</b>        | Instrument 1 | <b>User Name</b>     |                       |
| <b>Acq Method</b>             | s.m          | <b>Acquired Time</b> | 2/25/2021 11:41:44 AM |
| <b>IRM Calibration Status</b> | Success      | <b>DA Method</b>     | Default.m             |
| <b>Comment</b>                |              |                      |                       |

  

|                       |                             |              |
|-----------------------|-----------------------------|--------------|
| <b>Sample Group</b>   |                             | <b>Info.</b> |
| <b>Acquisition SW</b> | 6200 series TOF/6500 series |              |
| <b>Version</b>        | Q-TOF B.05.01 (B5125.2)     |              |

#### User Spectra

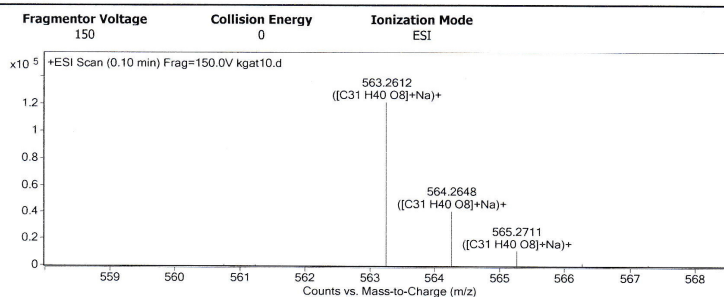

#### Peak List

| <i>m/z</i> | <i>z</i> | Abund     | Formula    | Ion     |
|------------|----------|-----------|------------|---------|
| 102.1273   | 1        | 84281.93  |            |         |
| 118.0856   | 1        | 18442.87  |            |         |
| 134.0802   | 1        | 26488.62  |            |         |
| 146.0803   | 1        | 39095.93  |            |         |
| 150.1117   | 1        | 18621.35  |            |         |
| 172.0936   | 1        | 38768.34  |            |         |
| 563.2612   | 1        | 121532.69 | C31 H40 O8 | (M+Na)+ |
| 564.2648   | 1        | 41008.18  | C31 H40 O8 | (M+Na)+ |
| 579.2346   | 1        | 14703.55  |            |         |
| 1103.5336  | 1        | 16689.55  |            |         |

#### Formula Calculator Element Limits

| Element | Min | Max |
|---------|-----|-----|
| C       | 3   | 60  |
| H       | 0   | 120 |
| O       | 0   | 30  |

#### Formula Calculator Results

| Formula    | CalculatedMass | CalculatedMz | Mz       | Diff. (mDa) | Diff. (ppm) | DBE     |
|------------|----------------|--------------|----------|-------------|-------------|---------|
| C31 H40 O8 | 540.2723       | 563.2615     | 563.2612 | 0.30        | 0.53        | 12.0000 |

--- End Of Report ---
